# Supplementary material for: Protein Profiling in Human Papillomavirus-Associated Cervical Carcinogenesis: Cornulin as a Biomarker for Disease Progression
Source: MDPI journal article supplement (doi:10.3390/cimb45040235), 2023-04-20
Supplement: s1 [file s1]

**Table S1** Semi-quantitative scoring method for immunohistochemical expression of ANXA2 and CRNN proteins

| Percentage of positive cells | Score | Staining intensity | Score |
|------------------------------|-------|--------------------|-------|
| < 1% positive cells          | 0     | No staining        | 0     |
| 1–25% positive cells         | 1     | Weak staining      | 1     |
| 26–50% positive cells        | 2     | Moderate staining  | 2     |
| 51–75% positive cells        | 3     | Strong staining    | 3     |
| ≥ 75% positive cells         | 4     |                    |       |

---

Final score = percentage of positive cells score x staining intensity score.

Final histoscore: 0 = negative.

1 to 3/12 = low expression.

≥ 4/12 = high expression.

---

**Table S3a** List of differentially expressed proteins in squamous intraepithelial lesion (SIL) versus normal cervix

| Protein names                      | Mol. weight [kDa] | Fold change |
|------------------------------------|-------------------|-------------|
| Histone H2A type 3                 | 14.135            | -4.70137    |
| Histone H2A type 1-C               |                   |             |
| Histone H2A type 1                 |                   |             |
| Histone H2A type 1-H               |                   |             |
| Histone H2A type 1-B/E             |                   |             |
| Histone H2A type 1-J               |                   |             |
| Histone H2A type 2-B               |                   |             |
| Histone H2A.J                      |                   |             |
| Histone H2AX                       |                   |             |
| Hemoglobin subunit alpha           | 15.257            | -3.3627     |
| Collagen alpha-1(I) chain          | 138.03            | -2.98011    |
| Actin, aortic smooth muscle        | 42.009            | -2.91875    |
| Actin, gamma-enteric smooth muscle |                   |             |
| Actin, alpha cardiac muscle 1      |                   |             |
| Actin, alpha skeletal muscle       |                   |             |
| Collagen alpha-3(VI) chain         | 343.67            | -2.62217    |
| Prolargin                          | 43.809            | -1.89943    |
| Hemoglobin subunit beta            | 15.998            | -1.85774    |
| Hemoglobin subunit delta           |                   |             |
| Annexin A2                         | 38.604            | -1.83448    |
| Putative annexin A2-like protein   |                   |             |
| Desmin                             | 53.535            | -1.82973    |
| Collagen alpha-2(I) chain          | 129.31            | -1.75035    |
| Lumican                            | 38.429            | -1.74055    |
| Collagen alpha-1(VI) chain         | 108.53            | -1.71452    |
| Collagen alpha-1(XIV) chain        | 193.51            | -1.69579    |
| Histone H4                         | 11.367            | -1.66344    |
| Collagen alpha-2(VI) chain         | 108.58            | -1.63643    |
| Filamin-A                          | 280.74            | -1.59287    |
| Vimentin                           | 53.651            | -1.55866    |
| Actin, cytoplasmic 2               | 41.792            | -1.54039    |
| Actin, cytoplasmic 1               |                   |             |
| Histone H2A type 2-C               | 14.107            | -1.51746    |
| Histone H2A type 2-A               |                   |             |
| Histone H2A type 1-A               |                   |             |
| Histone H2A.V                      |                   |             |
| Histone H2A.Z                      |                   |             |
| 14-3-3 protein zeta/delta          | 27.745            | -1.51517    |
| Cornulin                           | 53.533            | -1.50442    |

**Table S3b** List of differentially expressed proteins in squamous cell carcinoma (SCC) versus squamous intraepithelial lesion (SIL)

| Protein names                      | Mol. weight<br>[kDa] | Fold change |
|------------------------------------|----------------------|-------------|
| Histone H2A type 3                 | 14.135               | 15.94075    |
| Histone H2A type 1-C               |                      |             |
| Histone H2A type 1                 |                      |             |
| Histone H2A type 1-D               |                      |             |
| Histone H2A type 1-H               |                      |             |
| Histone H2A type 1-B/E             |                      |             |
| Histone H2A type 1-J               |                      |             |
| Histone H2A type 2-B               |                      |             |
| Histone H2A.J                      |                      |             |
| Histone H2AX                       |                      |             |
| Actin, cytoplasmic 2               | 41.792               | 9.840621    |
| Histone H2B type 2-E               | 13.948               | 9.180867    |
| Histone H2B type 1-M               |                      |             |
| Histone H2B type 1-N               |                      |             |
| Histone H2B type 1-H               |                      |             |
| Histone H2B type 2-F               |                      |             |
| Histone H2B type 1-C/E/F/G/I       |                      |             |
| Histone H2B type 1-D               |                      |             |
| Histone H2B type F-S               |                      |             |
| Histone H2B type 1-B               |                      |             |
| Histone H2B type 1-O               |                      |             |
| Histone H2B type 1-J               |                      |             |
| Histone H2B type 1-K               |                      |             |
| Putative histone H2B type 2-D      |                      |             |
| Histone H2B type 1-L               |                      |             |
| Putative histone H2B type 2-C      |                      |             |
| Histone H1.3                       | 22.35                | 8.654992    |
| Histone H1.2                       |                      |             |
| Histone H1.4                       |                      |             |
| Histone H4                         | 11.367               | 5.144723    |
| Histone H2A type 2-C               | 14.107               | 4.241194    |
| Histone H2A type 2-A               |                      |             |
| Histone H2A type 1-A               |                      |             |
| Histone H2A.V                      |                      |             |
| Histone H2A.Z                      |                      |             |
| Actin, cytoplasmic 1               | 41.792               | 4.024891    |
| Hemoglobin subunit alpha           | 15.257               | 2.757901    |
| Actin, aortic smooth muscle        | 42.009               | 2.535343    |
| Actin, gamma-enteric smooth muscle |                      |             |
| Actin, alpha cardiac muscle 1      |                      |             |
| Actin, alpha skeletal muscle       |                      |             |
| Histone H2B type 3-B               | 13.95                | 2.359147    |
| Annexin A2                         | 38.604               | 2.3024      |
| Putative annexin A2-like protein   |                      |             |

|                           |        |          |
|---------------------------|--------|----------|
| Desmin                    | 53.535 | 1.927182 |
| 14-3-3 protein zeta/delta | 27.745 | 1.798218 |
| Tubulin beta-4B chain     | 49.83  | 1.745452 |
| Tubulin beta-4A chain     |        |          |
| Hemoglobin subunit beta   | 15.998 | 1.606587 |
| Hemoglobin subunit delta  |        |          |
| Protein S100-A8           | 10.834 | 1.552563 |

**Table S3c** List of upregulated and downregulated proteins in squamous cell carcinoma (SCC) versus normal cervix.

| <b>Upregulated proteins</b>                  |                          |                    |
|----------------------------------------------|--------------------------|--------------------|
| <b>Protein names</b>                         | <b>Mol. weight [kDa]</b> | <b>Fold change</b> |
| Actin, cytoplasmic 2                         | 41.792                   | 13.28935           |
| Actin, cytoplasmic 2, N-terminally processed |                          |                    |
| Histone H2A type 3                           | 14.135                   | 11.23938           |
| Histone H2A type 1-C                         |                          |                    |
| Histone H2A type 1                           |                          |                    |
| Histone H2A type 1-D                         |                          |                    |
| Histone H2A type 1-H                         |                          |                    |
| Histone H2A type 1-B/E                       |                          |                    |
| Histone H2A type 1-J                         |                          |                    |
| Histone H2A type 1-F                         |                          |                    |
| Histone H2A type 1-K                         |                          |                    |
| Histone H2A type 2-B                         |                          |                    |
| Histone H2A.J                                |                          |                    |
| Histone H2AX                                 |                          |                    |
| Histone H2B 3                                | 13.948                   | 9.180867           |
| Histone H2B type 2-E                         |                          |                    |
| Histone H2B type 1-M                         |                          |                    |
| Histone H2B type 1-N                         |                          |                    |
| Histone H2B type 1-H                         |                          |                    |
| Histone H2B type 1-C/E/G                     |                          |                    |
| Histone H2B type 2-B                         |                          |                    |
| Histone H2B type 2-F                         |                          |                    |
| Histone H2B type 1-C/E/F/G/I                 |                          |                    |
| Histone H2B type 1-D                         |                          |                    |
| Histone H2B type F-S                         |                          |                    |
| Histone H2B type 1-B                         |                          |                    |
| Histone H2B type 1-O                         |                          |                    |
| Histone H2B type 1-J                         |                          |                    |
| Histone H2B type 1-K                         |                          |                    |
| Putative histone H2B type 2-D                |                          |                    |
| Histone H2B type 1-A                         |                          |                    |
| Histone H2B type 1-L                         |                          |                    |
| Histone H2B type 1-F/J/L                     |                          |                    |
| Histone H2B type 1-P                         |                          |                    |
| Putative histone H2B type 2-C                |                          |                    |
| Histone H1.3                                 | 22.35                    | 8.654992           |

|                                              |        |          |
|----------------------------------------------|--------|----------|
| Histone H1.2                                 |        |          |
| Histone H1.4                                 |        |          |
| Histone H4                                   | 11.367 | 3.481285 |
| Histone H2A type 2-C                         | 14.107 | 2.723737 |
| Histone H2A type 2-A                         |        |          |
| Histone H2A type 1-A                         |        |          |
| Histone H2A-alpha                            |        |          |
| Histone H2A.V                                |        |          |
| Histone H2A.Z                                |        |          |
| Actin, cytoplasmic 1                         | 41.792 | 2.484502 |
| Actin, cytoplasmic 1, N-terminally processed |        |          |
| Histone H2B type 3-A                         | 13.95  | 1.726984 |
| Histone H2B type 3-B                         |        |          |
| <b>Downregulated proteins</b>                |        |          |
| Collagen alpha-3(VI) chain                   | 343.67 | -2.96006 |
| Collagen alpha-2(I) chain                    | 129.31 | -2.67062 |
| Collagen alpha-1(I) chain                    | 138.03 | -2.65007 |
| Cornulin                                     | 53.533 | -2.53514 |

**Table S4** Demographic and pathology information of the samples obtained from the Department of Pathology, School of Medical Sciences, Universiti Sains Malaysia (USM) Kubang Kerian, Kelantan, Malaysia.

| No | Lab number   | Histopathological<br>Diagnosis | Patient age<br>(years) | SIL grade | SCC stage  |
|----|--------------|--------------------------------|------------------------|-----------|------------|
| 1  | P793/16(1)   | Normal cervix                  | 54                     | -         | -          |
| 2  | P2004/16(A2) | Normal cervix                  | 52                     | -         | -          |
| 3  | P3825/18(2)  | Normal cervix                  | 56                     | -         | -          |
| 4  | P2127/19(2)  | Normal cervix                  | 57                     | -         | -          |
| 5  | P4475/19(1)  | Normal cervix                  | 41                     | -         | -          |
| 6  | P4380/19(A1) | Normal cervix                  | 57                     | -         | -          |
| 7  | P733/19(5)   | SIL                            | 28                     | Grade I   | -          |
| 8  | P611/16(C)   | SIL                            | 36                     | Grade III | -          |
| 9  | P619/15(3)   | SIL                            | 49                     | Grade III | -          |
| 10 | P1952/15(3)  | SIL                            | 41                     | Grade III | -          |
| 11 | P1386/13(A1) | SIL                            | 48                     | Grade III | -          |
| 12 | P2075/16     | SCC                            | 51                     | -         | Stage IIB  |
| 13 | P3108/16(1)  | SCC                            | 91                     | -         | Stage IIIA |
| 14 | P2233/20     | SCC                            | 48                     | -         | Stage IB1  |
| 15 | P2646/13(B)  | SCC                            | 63                     | -         | Stage IB1  |
| 16 | P195/14(A2)  | SCC                            | 70                     | -         | Stage IIB  |
| 17 | P3698/14(B1) | SCC                            | 55                     | -         | Stage IIA  |

**Table S5** Tissue microarray specification of BB10011 and CR1101, Biomax Inc, USA

**Specification of tissue microarray BB10011**

| Position  | No. | Age | Sex | Organ/Anatomic Site | Pathology diagnosis                                       | TNM | Grade | Stage | Type | Tissue ID. |
|-----------|-----|-----|-----|---------------------|-----------------------------------------------------------|-----|-------|-------|------|------------|
| <b>A1</b> | 1   | 40  | F   | Cervix              | Cervical intraepithelial neoplasia                        | -   | 1     | -     | CIN  | Fdu021939  |
| <b>A2</b> | 2   | 40  | F   | Cervix              | Cervical intraepithelial neoplasia                        | -   | 1     | -     | CIN  | Fdu021939  |
| <b>A3</b> | 3   | 47  | F   | Cervix              | Cervical intraepithelial neoplasia                        | -   | 1     | -     | CIN  | Fdu020509  |
| <b>A4</b> | 4   | 47  | F   | Cervix              | Cervical intraepithelial neoplasia                        | -   | 1     | -     | CIN  | Fdu020509  |
| <b>A5</b> | 5   | 43  | F   | Cervix              | Cervical intraepithelial neoplasia                        | -   | 1     | -     | CIN  | Fdu060215  |
| <b>A6</b> | 6   | 43  | F   | Cervix              | Cervical intraepithelial neoplasia                        | -   | 1     | -     | CIN  | Fdu060215  |
| <b>A7</b> | 7   | 58  | F   | Cervix              | Cervical intraepithelial neoplasia                        | -   | -     | -     | CIN  | Fdu050684  |
| <b>A8</b> | 8   | 58  | F   | Cervix              | Cervical intraepithelial neoplasia                        | -   | 1     | -     | CIN  | Fdu050684  |
| <b>B1</b> | 9   | 38  | F   | Cervix              | Cervical intraepithelial neoplasia                        | -   | 1     | -     | CIN  | Fdu050583  |
| <b>B2</b> | 10  | 38  | F   | Cervix              | Cervical intraepithelial neoplasia                        | -   | 1     | -     | CIN  | Fdu050583  |
| <b>B3</b> | 11  | 53  | F   | Cervix              | Cervical intraepithelial neoplasia                        | -   | -     | -     | CIN  | Fdu021993  |
| <b>B4</b> | 12  | 53  | F   | Cervix              | Cervical intraepithelial neoplasia with epidermal erosion | -   | 1     | -     | CIN  | Fdu021993  |
| <b>B5</b> | 13  | 44  | F   | Cervix              | Cervical intraepithelial neoplasia                        | -   | 1     | -     | CIN  | Fdu060278  |
| <b>B6</b> | 14  | 44  | F   | Cervix              | Cervical intraepithelial neoplasia                        | -   | 1     | -     | CIN  | Fdu060278  |
| <b>B7</b> | 15  | 44  | F   | Cervix              | Cervical intraepithelial neoplasia                        | -   | 1     | -     | CIN  | Fdu050612  |
| <b>B8</b> | 16  | 44  | F   | Cervix              | Cervical intraepithelial neoplasia                        | -   | 1     | -     | CIN  | Fdu050612  |
| <b>C1</b> | 17  | 40  | F   | Cervix              | Cervical intraepithelial neoplasia                        | -   | 3     | -     | CIN  | Fdu060279  |
| <b>C2</b> | 18  | 40  | F   | Cervix              | Cervical intraepithelial neoplasia                        | -   | 3     | -     | CIN  | Fdu060279  |
| <b>C3</b> | 19  | 32  | F   | Cervix              | Cervical intraepithelial neoplasia                        | -   | 2     | -     | CIN  | Fdu021238  |
| <b>C4</b> | 20  | 32  | F   | Cervix              | Cervical intraepithelial neoplasia                        | -   | 2     | -     | CIN  | Fdu021238  |
| <b>C5</b> | 21  | 66  | F   | Cervix              | Cervical intraepithelial neoplasia                        | -   | 1     | -     | CIN  | Fur010400  |
| <b>C6</b> | 22  | 66  | F   | Cervix              | Cervical intraepithelial neoplasia                        | -   | 1     | -     | CIN  | Fur010400  |
| <b>C7</b> | 23  | 51  | F   | Cervix              | Cervical intraepithelial neoplasia                        | -   | -     | -     | CIN  | Fur060453  |

|           |    |    |   |        |                                                           |         |   |    |           |           |
|-----------|----|----|---|--------|-----------------------------------------------------------|---------|---|----|-----------|-----------|
| <b>C8</b> | 24 | 51 | F | Cervix | Cervical intraepithelial neoplasia with epidermal erosion | -       | 3 | -  | CIN       | Fur060453 |
| <b>D1</b> | 25 | 42 | F | Cervix | Cervical intraepithelial neoplasia                        | -       | 1 | -  | CIN       | Fdu050665 |
| <b>D2</b> | 26 | 42 | F | Cervix | Cervical intraepithelial neoplasia with epidermal erosion | -       | 1 | -  | CIN       | Fdu050665 |
| <b>D3</b> | 27 | 45 | F | Cervix | Cervical intraepithelial neoplasia                        | -       | 2 | -  | CIN       | Fdu030335 |
| <b>D4</b> | 28 | 45 | F | Cervix | Cervical intraepithelial neoplasia                        | -       | 2 | -  | CIN       | Fdu030335 |
| <b>D5</b> | 29 | 60 | F | Cervix | Cervical intraepithelial neoplasia                        | -       | 3 | -  | CIN       | Fdu030441 |
| <b>D6</b> | 30 | 60 | F | Cervix | Cervical intraepithelial neoplasia                        | -       | 3 | -  | CIN       | Fdu030441 |
| <b>D7</b> | 31 | 47 | F | Cervix | Cervical intraepithelial neoplasia                        | -       | 3 | -  | CIN       | Fdu021150 |
| <b>D8</b> | 32 | 47 | F | Cervix | Cervical intraepithelial neoplasia                        | -       | 3 | -  | CIN       | Fdu021150 |
| <b>E1</b> | 33 | 47 | F | Cervix | Cervical intraepithelial neoplasia                        | -       | 3 | -  | CIN       | Fdu050656 |
| <b>E2</b> | 34 | 47 | F | Cervix | Cervical intraepithelial neoplasia                        | -       | 3 | -  | CIN       | Fdu050656 |
| <b>E3</b> | 35 | 42 | F | Cervix | Cervical intraepithelial neoplasia                        | -       | 3 | -  | CIN       | Fdu040991 |
| <b>E4</b> | 36 | 42 | F | Cervix | Cervical intraepithelial neoplasia                        | -       | 3 | -  | CIN       | Fdu040991 |
| <b>E5</b> | 37 | 43 | F | Cervix | Cervical intraepithelial neoplasia                        | -       | 2 | -  | CIN       | Fur050759 |
| <b>E6</b> | 38 | 43 | F | Cervix | Cervical intraepithelial neoplasia                        | -       | 2 | -  | CIN       | Fur050759 |
| <b>E7</b> | 39 | 41 | F | Cervix | Cervical intraepithelial neoplasia                        | -       | 2 | -  | CIN       | Fdu060182 |
| <b>E8</b> | 40 | 41 | F | Cervix | Cervical intraepithelial neoplasia                        | -       | 2 | -  | CIN       | Fdu060182 |
| <b>F1</b> | 41 | 37 | F | Cervix | Cervical intraepithelial neoplasia                        | -       | 3 | -  | CIN       | Fdu060282 |
| <b>F2</b> | 42 | 37 | F | Cervix | Cervical intraepithelial neoplasia                        | -       | 3 | -  | CIN       | Fdu060282 |
| <b>F3</b> | 43 | 54 | F | Cervix | Squamous cell carcinoma                                   | T1N0M0  | 1 | I  | Malignant | Fdu020681 |
| <b>F4</b> | 44 | 54 | F | Cervix | Squamous cell carcinoma                                   | T1N0M0  | 1 | I  | Malignant | Fdu020681 |
| <b>F5</b> | 45 | 76 | F | Cervix | Squamous cell carcinoma                                   | T2N0M0  | 2 | II | Malignant | Fdu020363 |
| <b>F6</b> | 46 | 76 | F | Cervix | Squamous cell carcinoma                                   | T2N0M0  | 2 | II | Malignant | Fdu020363 |
| <b>F7</b> | 47 | 48 | F | Cervix | Squamous cell carcinoma                                   | T1BN0M0 | 3 | IB | Malignant | Fdu020612 |
| <b>F8</b> | 48 | 48 | F | Cervix | Squamous cell carcinoma                                   | T1BN0M0 | 3 | IB | Malignant | Fdu020612 |

Specification of tissue microarray CR1101

| Position | No. | Age | Sex | Organ/Anatomic Site | Pathology diagnosis                 | TNM     | Grade | Stage | Type      | Tissue ID. |
|----------|-----|-----|-----|---------------------|-------------------------------------|---------|-------|-------|-----------|------------|
| A1       | 1   | 45  | F   | Cervix              | Squamous cell carcinoma             | T2AN0M0 | 1     | IIA   | Malignant | Fdu050255  |
| A2       | 2   | 50  | F   | Cervix              | Squamous cell carcinoma             | T1N0M0  | 2     | I     | Malignant | Fdu050304  |
| A3       | 3   | 48  | F   | Cervix              | Squamous cell carcinoma             | T1N0M0  | 2     | I     | Malignant | Fdu050087  |
| A4       | 4   | 55  | F   | Cervix              | Squamous cell carcinoma             | T3N1M0  | 2     | IIIB  | Malignant | Fdu050086  |
| A5       | 5   | 41  | F   | Cervix              | Squamous cell carcinoma             | T1N0M0  | 1     | I     | Malignant | Fdu031081  |
| A6       | 6   | 48  | F   | Cervix              | Squamous cell carcinoma             | T2BN0M0 | 2     | IIB   | Malignant | Fdu041171  |
| A7       | 7   | 53  | F   | Cervix              | Squamous cell carcinoma             | T2N0M0  | 2     | II    | Malignant | Fdu050620  |
| A8       | 8   | 32  | F   | Cervix              | Squamous cell carcinoma             | T1BN0M0 | -     | IB    | Malignant | Fdu041026  |
| A9       | 9   | 54  | F   | Cervix              | Squamous cell carcinoma             | T2BN0M0 | 2     | IIB   | Malignant | Fdu041131  |
| A10      | 10  | 80  | F   | Cervix              | Squamous cell carcinoma             | T1N0M0  | 2     | I     | Malignant | Fdu030670  |
| B1       | 11  | 63  | F   | Cervix              | Squamous cell carcinoma             | T2AN0M0 | 3     | IIA   | Malignant | Fdu030882  |
| B2       | 12  | 50  | F   | Cervix              | Squamous cell carcinoma             | T2BN0M0 | 3     | IIB   | Malignant | Fdu041325  |
| B3       | 13  | 39  | F   | Cervix              | Squamous cell carcinoma             | T1N0M0  | 2     | I     | Malignant | Fdu041045  |
| B4       | 14  | 78  | F   | Cervix              | Squamous cell carcinoma             | T2AN0M0 | 2     | IIA   | Malignant | Fdu031029  |
| B5       | 15  | 51  | F   | Cervix              | Squamous cell carcinoma             | T1BN0M0 | 2     | IB    | Malignant | Fdu050231  |
| B6       | 16  | 32  | F   | Cervix              | Squamous cell carcinoma             | T2BN0M0 | 2     | IIB   | Malignant | Fdu041031  |
| B7       | 17  | 41  | F   | Cervix              | Squamous cell carcinoma             | T1N0M0  | 2     | I     | Malignant | Fdu032098  |
| B8       | 18  | 58  | F   | Cervix              | Squamous cell carcinoma             | T2BN0M0 | 2     | IIB   | Malignant | Fdu030689  |
| B9       | 19  | 50  | F   | Cervix              | Squamous cell carcinoma             | T1N0M0  | -     | I     | Malignant | Fdu031649  |
| B10      | 20  | 63  | F   | Cervix              | Squamous cell carcinoma             | T1BN0M0 | 3     | IB    | Malignant | Fdu031823  |
| C1       | 21  | 46  | F   | Cervix              | Squamous cell carcinoma             | T2AN0M0 | 3     | IIA   | Malignant | Fdu050186  |
| C2       | 22  | 41  | F   | Cervix              | Squamous cell carcinoma             | T2BN0M0 | 3     | IIB   | Malignant | Fdu041033  |
| C3       | 23  | 35  | F   | Cervix              | Squamous cell carcinoma<br>(sparse) | -       | -     | -     | Malignant | Fdu050245  |
| C4       | 24  | 60  | F   | Cervix              | Squamous cell carcinoma             | T1N0M0  | 3     | I     | Malignant | Fdu030623  |
| C5       | 25  | 60  | F   | Cervix              | Squamous cell carcinoma             | T2AN0M0 | 2     | IIA   | Malignant | Fdu030918  |
| C6       | 26  | 58  | F   | Cervix              | Squamous cell carcinoma             | T2BN0M0 | 3     | IIB   | Malignant | Fdu050187  |
| C7       | 27  | 42  | F   | Cervix              | Squamous cell carcinoma             | T2BN0M0 | 3     | IIB   | Malignant | Fdu050258  |



|            |    |    |   |        |                                     |         |   |      |           |           |
|------------|----|----|---|--------|-------------------------------------|---------|---|------|-----------|-----------|
| <b>C8</b>  | 28 | 38 | F | Cervix | Squamous cell carcinoma             | T1BN0M0 | 3 | IB   | Malignant | Fdu031959 |
| <b>C9</b>  | 29 | 62 | F | Cervix | Squamous cell carcinoma             | T1CN0M0 | 3 | IC   | Malignant | Fdu030657 |
| <b>C10</b> | 30 | 45 | F | Cervix | Squamous cell carcinoma             | T2N0M0  | 3 | II   | Malignant | Fdu050328 |
| <b>D1</b>  | 31 | 42 | F | Cervix | Squamous cell carcinoma             | T2BN0M0 | 2 | IIB  | Malignant | Fdu040492 |
| <b>D2</b>  | 32 | 58 | F | Cervix | Squamous cell carcinoma             | T2N0M0  | 2 | II   | Malignant | Fdu040874 |
| <b>D3</b>  | 33 | 48 | F | Cervix | Squamous cell carcinoma             | T2AN0M0 | 2 | IIA  | Malignant | Fdu040093 |
| <b>D4</b>  | 34 | 59 | F | Cervix | Squamous cell carcinoma             | T2AN0M0 | 1 | IIA  | Malignant | Fdu032230 |
| <b>D5</b>  | 35 | 33 | F | Cervix | Squamous cell carcinoma             | T1N1M0  | 1 | IIIB | Malignant | Fdu050393 |
| <b>D6</b>  | 36 | 67 | F | Cervix | Squamous cell carcinoma             | T1BN0M0 | 1 | IB   | Malignant | Fdu032429 |
| <b>D7</b>  | 37 | 42 | F | Cervix | Squamous cell carcinoma             | T1BN0M0 | - | IB   | Malignant | Fdu040875 |
| <b>D8</b>  | 38 | 40 | F | Cervix | Squamous cell carcinoma             | T1BN0M0 | 2 | IB   | Malignant | Fdu040128 |
| <b>D9</b>  | 39 | 37 | F | Cervix | Squamous cell carcinoma             | T2AN0M0 | 1 | IIA  | Malignant | Fdu050343 |
| <b>D10</b> | 40 | 58 | F | Cervix | Squamous cell carcinoma             | T2AN0M0 | 2 | IIA  | Malignant | Fdu030694 |
| <b>E1</b>  | 41 | 40 | F | Cervix | Squamous cell carcinoma             | T1N0M0  | 2 | I    | Malignant | Fdu030467 |
| <b>E2</b>  | 42 | 46 | F | Cervix | Squamous cell carcinoma             | T1BN1M0 | 2 | IIIB | Malignant | Fdu031222 |
| <b>E3</b>  | 43 | 67 | F | Cervix | Squamous cell carcinoma             | T1BN0M0 | - | IB   | Malignant | Fdu031576 |
| <b>E4</b>  | 44 | 36 | F | Cervix | Squamous cell carcinoma             | T2AN0M0 | 3 | IIA  | Malignant | Fdu050136 |
| <b>E5</b>  | 45 | 48 | F | Cervix | Squamous cell carcinoma             | T2AN0M0 | 2 | IIA  | Malignant | Fdu060001 |
| <b>E6</b>  | 46 | 42 | F | Cervix | Squamous cell carcinoma             | T1N0M0  | 3 | I    | Malignant | Fdu050080 |
| <b>E7</b>  | 47 | 42 | F | Cervix | Squamous cell carcinoma             | T2BN0M0 | 3 | IIB  | Malignant | Fdu041266 |
| <b>E8</b>  | 48 | 41 | F | Cervix | Squamous cell carcinoma             | T2AN0M0 | 3 | IIA  | Malignant | Fdu041301 |
| <b>E9</b>  | 49 | 55 | F | Cervix | Squamous cell carcinoma             | T1N0M0  | 3 | I    | Malignant | Fdu031543 |
| <b>E10</b> | 50 | 61 | F | Cervix | Squamous cell carcinoma             | T1BN0M0 | 3 | IB   | Malignant | Fdu041326 |
| <b>F1</b>  | 51 | 48 | F | Cervix | Squamous cell carcinoma             | T1N0M0  | 3 | I    | Malignant | Fdu032401 |
| <b>F2</b>  | 52 | 39 | F | Cervix | Squamous cell carcinoma             | T2N0M0  | 3 | II   | Malignant | Fdu050590 |
| <b>F3</b>  | 53 | 46 | F | Cervix | Squamous cell carcinoma<br>(sparse) | T1N0M0  | 3 | I    | Malignant | Fdu031555 |
| <b>F4</b>  | 54 | 71 | F | Cervix | Squamous cell carcinoma             | T1BN0M0 | 3 | IB   | Malignant | Fdu031573 |
| <b>F5</b>  | 55 | 46 | F | Cervix | Squamous cell carcinoma             | T2BN0M0 | 3 | IIB  | Malignant | Fdu032031 |
| <b>F6</b>  | 56 | 67 | F | Cervix | Squamous cell carcinoma             | T1N0M0  | 3 | I    | Malignant | Fdu050313 |
| <b>F7</b>  | 57 | 50 | F | Cervix | Squamous cell carcinoma             | T1BN0M0 | 3 | IB   | Malignant | Fdu050135 |
| <b>F8</b>  | 58 | 40 | F | Cervix | Squamous cell carcinoma             | T2AN0M0 | 3 | IIA  | Malignant | Fdu031179 |

|            |    |    |   |        |                         |         |   |      |           |           |
|------------|----|----|---|--------|-------------------------|---------|---|------|-----------|-----------|
| <b>F9</b>  | 59 | 38 | F | Cervix | Squamous cell carcinoma | T1N0M0  | 3 | I    | Malignant | Fdu031388 |
| <b>F10</b> | 60 | 72 | F | Cervix | Squamous cell carcinoma | T2AN0M0 | 3 | IIA  | Malignant | Fdu050157 |
| <b>G1</b>  | 61 | 30 | F | Cervix | Squamous cell carcinoma | T1AN0M0 | 3 | IA   | Malignant | Fdu050037 |
| <b>G2</b>  | 62 | 51 | F | Cervix | Squamous cell carcinoma | T1BN0M0 | 3 | IB   | Malignant | Fdu050830 |
| <b>G3</b>  | 63 | 40 | F | Cervix | Squamous cell carcinoma | T1N0M0  | 3 | I    | Malignant | Fdu041331 |
| <b>G4</b>  | 64 | 50 | F | Cervix | Squamous cell carcinoma | T1N0M0  | 3 | I    | Malignant | Fdu030548 |
| <b>G5</b>  | 65 | 39 | F | Cervix | Squamous cell carcinoma | T3N0M0  | 3 | III  | Malignant | Fdu050252 |
| <b>G6</b>  | 66 | 45 | F | Cervix | Squamous cell carcinoma | T1N1M0  | 3 | IIIB | Malignant | Fdu050023 |
| <b>G7</b>  | 67 | 39 | F | Cervix | Squamous cell carcinoma | T2BN0M0 | 3 | IIB  | Malignant | Fdu050041 |
| <b>G8</b>  | 68 | 50 | F | Cervix | Squamous cell carcinoma | T1BN0M0 | 3 | IB   | Malignant | Fdu050168 |
| <b>G9</b>  | 69 | 47 | F | Cervix | Squamous cell carcinoma | T1BN0M0 | 3 | IB   | Malignant | Fdu031647 |
| <b>G10</b> | 70 | 44 | F | Cervix | Squamous cell carcinoma | T1N0M0  | 3 | I    | Malignant | Fdu032033 |
| <b>H1</b>  | 71 | 49 | F | Cervix | Squamous cell carcinoma | T1N0M0  | 3 | I    | Malignant | Fdu032415 |
| <b>H2</b>  | 72 | 43 | F | Cervix | Squamous cell carcinoma | T1BN0M0 | 2 | IB   | Malignant | Fdu040322 |
| <b>H3</b>  | 73 | 49 | F | Cervix | Squamous cell carcinoma | T2AN0M0 | 3 | IIA  | Malignant | Fdu032247 |
| <b>H4</b>  | 74 | 50 | F | Cervix | Squamous cell carcinoma | T2AN0M0 | 3 | IIA  | Malignant | Fdu050337 |
| <b>H5</b>  | 75 | 50 | F | Cervix | Squamous cell carcinoma | T1N0M0  | 3 | I    | Malignant | Fdu030591 |
| <b>H6</b>  | 76 | 42 | F | Cervix | Squamous cell carcinoma | T2AN0M0 | 3 | IIA  | Malignant | Fdu041260 |
| <b>H7</b>  | 77 | 44 | F | Cervix | Squamous cell carcinoma | T1BN0M0 | 3 | IB   | Malignant | Fdu041259 |
| <b>H8</b>  | 78 | 57 | F | Cervix | Squamous cell carcinoma | T1BN0M0 | 3 | IB   | Malignant | Fdu032209 |
| <b>H9</b>  | 79 | 40 | F | Cervix | Squamous cell carcinoma | T1N0M0  | 3 | I    | Malignant | Fdu041291 |
| <b>H10</b> | 80 | 53 | F | Cervix | Squamous cell carcinoma | T1BN0M0 | 3 | IB   | Malignant | Fdu031345 |
| <b>I1</b>  | 81 | 50 | F | Cervix | Squamous cell carcinoma | T2N0M0  | 2 | II   | Malignant | Fdu040488 |
| <b>I2</b>  | 82 | 48 | F | Cervix | Squamous cell carcinoma | T1BN0M0 | 2 | IB   | Malignant | Fdu032482 |
| <b>I3</b>  | 83 | 42 | F | Cervix | Squamous cell carcinoma | T1N0M0  | 3 | I    | Malignant | Fdu040138 |
| <b>I4</b>  | 84 | 40 | F | Cervix | Squamous cell carcinoma | T1N0M0  | 3 | I    | Malignant | Fdu040302 |
| <b>I5</b>  | 85 | 38 | F | Cervix | Squamous cell carcinoma | T2AN0M0 | 3 | IIA  | Malignant | Fdu032381 |
| <b>I6</b>  | 86 | 44 | F | Cervix | Squamous cell carcinoma | T1BN0M0 | 3 | IB   | Malignant | Fdu032527 |
| <b>I7</b>  | 87 | 58 | F | Cervix | Squamous cell carcinoma | T1N0M0  | 3 | I    | Malignant | Fdu040254 |
| <b>I8</b>  | 88 | 55 | F | Cervix | Squamous cell carcinoma | T1N0M0  | 3 | I    | Malignant | Fdu040032 |
| <b>I9</b>  | 89 | 67 | F | Cervix | Squamous cell carcinoma | T1N0M0  | 3 | I    | Malignant | Fdu040075 |
| <b>I10</b> | 90 | 68 | F | Cervix | Squamous cell carcinoma | T2AN0M0 | 3 | IIA  | Malignant | Fdu032417 |

|            |     |    |   |        |                                     |         |   |     |           |           |
|------------|-----|----|---|--------|-------------------------------------|---------|---|-----|-----------|-----------|
| <b>J1</b>  | 91  | 29 | F | Cervix | Squamous cell carcinoma             | T1N0M0  | 3 | I   | Malignant | Fdu031227 |
| <b>J2</b>  | 92  | 54 | F | Cervix | Squamous cell carcinoma             | T1N0M0  | 3 | I   | Malignant | Fdu041086 |
| <b>J3</b>  | 93  | 46 | F | Cervix | Squamous cell carcinoma<br>(sparse) | T1BN0M0 | - | IB  | Malignant | Fdu031194 |
| <b>J4</b>  | 94  | 55 | F | Cervix | Squamous cell carcinoma             | T1N0M0  | 3 | I   | Malignant | Fdu030692 |
| <b>J5</b>  | 95  | 45 | F | Cervix | Squamous cell carcinoma             | T1BN0M0 | 3 | IB  | Malignant | Fdu050045 |
| <b>J6</b>  | 96  | 49 | F | Cervix | Adenocarcinoma                      | T1N0M0  | 2 | I   | Malignant | Fdu040462 |
| <b>J7</b>  | 97  | 46 | F | Cervix | Adenocarcinoma                      | T2BN0M0 | 2 | IIB | Malignant | Fdu041224 |
| <b>J8</b>  | 98  | 49 | F | Cervix | Adenosquamous carcinoma             | T1N0M0  | - | I   | Malignant | Fdu041307 |
| <b>J9</b>  | 99  | 47 | F | Cervix | Endometrioid<br>adenocarcinoma      | T1BN0M0 | 1 | IB  | Malignant | Fdu032048 |
| <b>J10</b> | 100 | 51 | F | Cervix | Endometrioid<br>adenocarcinoma      | T2AN0M0 | 1 | IIA | Malignant | Fdu040099 |
| <b>K1</b>  | 101 | 58 | F | Cervix | Adjacent chronic cervicitis         | -       | - | -   | NAT       | Fdu140266 |
| <b>K2</b>  | 102 | 61 | F | Cervix | Adjacent chronic cervicitis         | -       | - | -   | NAT       | Fdu150094 |
| <b>K3</b>  | 103 | 60 | F | Cervix | Adjacent chronic cervicitis         | -       | - | -   | NAT       | Fdu140176 |
| <b>K4</b>  | 104 | 63 | F | Cervix | Adjacent chronic cervicitis         | -       | - | -   | NAT       | Fdu150376 |
| <b>K5</b>  | 105 | 70 | F | Cervix | Adjacent cervical canals tissue     | -       | - | -   | NAT       | Fdu031779 |
| <b>K6</b>  | 106 | 70 | F | Cervix | Adjacent cervical canals tissue     | -       | - | -   | NAT       | Fdu031820 |
| <b>K7</b>  | 107 | 70 | F | Cervix | Adjacent cervix tissue              | -       | - | -   | NAT       | Fdu031822 |
| <b>K8</b>  | 108 | 40 | F | Cervix | Adjacent cervix tissue              | -       | - | -   | NAT       | Fdu031909 |
| <b>K9</b>  | 109 | 72 | F | Cervix | Adjacent cervix tissue              | -       | - | -   | NAT       | Fdu031770 |
| <b>K10</b> | 110 | 50 | F | Cervix | Adjacent cervix tissue              | -       | - | -   | NAT       | Fdu032477 |
