# Supplementary material for: Protein Profiling in Human Papillomavirus-Associated Cervical Carcinogenesis: Cornulin as a Biomarker for Disease Progression
Source: Curr Issues Mol Biol. 2023 Apr 20;45(4):3603–27. doi: 10.3390/cimb45040235 (PMC10137006; doi:10.3390/cimb45040235)
Supplement: Supplementary file 1 [file cimb-45-00235-s001.zip › Supplementary Table S2.xlsx]

## Sheet: overlapping
Protein Group	Protein ID	Accession	-10lgP	#Peptides	#Unique	PTM	Avg. Mass	Description
15	1	tr|Q8WVW5|Q8WVW5_HUMAN	156.79	11	7	Carbamidomethylation	40503	Putative uncharacterized protein (Fragment) OS=Homo sapiens PE=2 SV=1
15	2	tr|Q53G76|Q53G76_HUMAN	156.79	11	7	Carbamidomethylation	41721	Beta actin variant (Fragment) OS=Homo sapiens PE=2 SV=1
15	3	P60709|ACTB_HUMAN	156.79	11	7	Carbamidomethylation	41737	Actin cytoplasmic 1 OS=Homo sapiens GN=ACTB PE=1 SV=1
35	4	tr|Q53GK6|Q53GK6_HUMAN	82.93	4	1		41723	Beta actin variant (Fragment) OS=Homo sapiens PE=2 SV=1
15	5	P63261|ACTG_HUMAN	156.79	11	7	Carbamidomethylation	41793	Actin cytoplasmic 2 OS=Homo sapiens GN=ACTG1 PE=1 SV=1
15	6	tr|Q1KLZ0|Q1KLZ0_HUMAN	156.79	11	7	Carbamidomethylation	41737	HCG15971 isoform CRA_a OS=Homo sapiens GN=PS1TP5BP1 PE=2 SV=1
35	7	tr|Q53G99|Q53G99_HUMAN	82.93	4	1		41765	Beta actin variant (Fragment) OS=Homo sapiens PE=2 SV=1
19	8	tr|B4E335|B4E335_HUMAN	89.81	3	3		39226	cDNA FLJ52842 highly similar to Actin cytoplasmic 1 OS=Homo sapiens PE=2 SV=1
15	9	tr|B4E3A4|B4E3A4_HUMAN	156.79	11	7	Carbamidomethylation	39800	cDNA FLJ57283 highly similar to Actin cytoplasmic 2 OS=Homo sapiens PE=2 SV=1
31	10	tr|B4DVQ0|B4DVQ0_HUMAN	70.2	3	2		37349	cDNA FLJ58286 highly similar to Actin cytoplasmic 2 OS=Homo sapiens PE=2 SV=1
15	11	tr|I3L3I4|I3L3I4_HUMAN	156.79	11	7	Carbamidomethylation	42106	Actin cytoplasmic 2 N-terminally processed OS=Homo sapiens GN=ACTG1 PE=3 SV=1
14	17	P63267|ACTH_HUMAN	161.86	14	10	Carbamidomethylation; Mutation	41877	Actin gamma-enteric smooth muscle OS=Homo sapiens GN=ACTG2 PE=1 SV=1
12	19	tr|B3KW67|B3KW67_HUMAN	112.44	6	3	Mutation	41817	cDNA FLJ42347 fis clone UTERU2003399 highly similar to Actin gamma-enteric smooth muscle OS=Homo sapiens PE=2 SV=1
1	20	tr|F6KPG5|F6KPG5_HUMAN	127.12	12	12	Carbamidomethylation; Oxidation (M)	66531	Albumin (Fragment) OS=Homo sapiens PE=2 SV=1
1	21	tr|A8K9P0|A8K9P0_HUMAN	127.12	12	12	Carbamidomethylation; Oxidation (M)	69268	cDNA FLJ78413 highly similar to Homo sapiens albumin mRNA OS=Homo sapiens PE=2 SV=1
1	22	P02768|ALBU_HUMAN	127.12	12	12	Carbamidomethylation; Oxidation (M)	69367	Serum albumin OS=Homo sapiens GN=ALB PE=1 SV=2
28	26	tr|I3L3I0|I3L3I0_HUMAN	32.28	1	1		23845	Actin cytoplasmic 2 N-terminally processed (Fragment) OS=Homo sapiens GN=ACTG1 PE=3 SV=1
28	27	tr|I3L1U9|I3L1U9_HUMAN	32.28	1	1		23845	Actin cytoplasmic 2 N-terminally processed (Fragment) OS=Homo sapiens GN=ACTG1 PE=3 SV=1
14	30	tr|B4DW52|B4DW52_HUMAN	120.13	6	3	Oxidation (M); Mutation	38633	cDNA FLJ55253 highly similar to Actin cytoplasmic 1 OS=Homo sapiens PE=2 SV=1
12	34	tr|Q13707|Q13707_HUMAN	112.44	6	3	Mutation	36807	ACTA2 protein (Fragment) OS=Homo sapiens GN=ACTA2 PE=2 SV=1
13	39	P04264|K2C1_HUMAN	99.94	5	1		66039	Keratin type II cytoskeletal 1 OS=Homo sapiens GN=KRT1 PE=1 SV=6
22	44	tr|B3KRK8|B3KRK8_HUMAN	91.13	4	4		46976	cDNA FLJ34494 fis clone HLUNG2005030 highly similar to VIMENTIN OS=Homo sapiens PE=2 SV=1
22	45	tr|B0YJC4|B0YJC4_HUMAN	91.13	4	4		49653	Vimentin OS=Homo sapiens GN=VIM PE=3 SV=1
22	46	P08670|VIME_HUMAN	91.13	4	4		53652	Vimentin OS=Homo sapiens GN=VIM PE=1 SV=4
61	47	tr|Q53HU8|Q53HU8_HUMAN	31.51	1	1		53684	Vimentin variant (Fragment) OS=Homo sapiens PE=2 SV=1
28	54	tr|I3L3R2|I3L3R2_HUMAN	32.28	1	1		18032	Actin cytoplasmic 2 N-terminally processed (Fragment) OS=Homo sapiens GN=ACTG1 PE=3 SV=1
78	56	tr|D6RHD5|D6RHD5_HUMAN	41.94	1	1		52059	Serum albumin OS=Homo sapiens GN=ALB PE=2 SV=1
19	59	P13645|K1C10_HUMAN	128.65	5	5	Carbamidomethylation	58827	Keratin type I cytoskeletal 10 OS=Homo sapiens GN=KRT10 PE=1 SV=6
28	61	tr|F6UVQ4|F6UVQ4_HUMAN	32.28	1	1		16759	Actin aortic smooth muscle (Fragment) OS=Homo sapiens GN=ACTA2 PE=2 SV=1
28	62	tr|F6QUT6|F6QUT6_HUMAN	32.28	1	1		16759	Actin aortic smooth muscle (Fragment) OS=Homo sapiens GN=ACTA2 PE=3 SV=1
28	69	tr|K7EM38|K7EM38_HUMAN	32.28	1	1		14522	Actin cytoplasmic 2 N-terminally processed (Fragment) OS=Homo sapiens GN=ACTG1 PE=3 SV=1
28	70	tr|J3KT65|J3KT65_HUMAN	32.28	1	1		21804	Actin cytoplasmic 2 N-terminally processed OS=Homo sapiens GN=ACTG1 PE=3 SV=1
28	91	tr|F8WB63|F8WB63_HUMAN	32.28	1	1		11403	Actin gamma-enteric smooth muscle OS=Homo sapiens GN=ACTG2 PE=2 SV=1
28	92	tr|B8ZZJ2|B8ZZJ2_HUMAN	32.28	1	1		12969	Actin gamma-enteric smooth muscle OS=Homo sapiens GN=ACTG2 PE=2 SV=1
3	94	P35527|K1C9_HUMAN	172.31	27	27	Carbamidomethylation; Oxidation (M); Mutation	62064	Keratin type I cytoskeletal 9 OS=Homo sapiens GN=KRT9 PE=1 SV=3
18	95	P01857|IGHG1_HUMAN	84.57	3	3	Carbamidomethylation	36106	Ig gamma-1 chain C region OS=Homo sapiens GN=IGHG1 PE=1 SV=1
18	96	tr|Q6PYX1|Q6PYX1_HUMAN	84.57	3	3	Carbamidomethylation	38162	Hepatitis B virus receptor binding protein (Fragment) OS=Homo sapiens PE=1 SV=1
18	97	tr|Q6GMX6|Q6GMX6_HUMAN	84.57	3	3	Carbamidomethylation	51083	IGH@ protein OS=Homo sapiens GN=IGH@ PE=1 SV=1
18	98	tr|Q6N096|Q6N096_HUMAN	84.57	3	3	Carbamidomethylation	50927	Putative uncharacterized protein DKFZp686I15196 OS=Homo sapiens GN=DKFZp686I15196 PE=2 SV=1
18	99	tr|A8K008|A8K008_HUMAN	84.57	3	3	Carbamidomethylation	51597	cDNA FLJ78387 OS=Homo sapiens PE=2 SV=1
18	100	tr|Q6N089|Q6N089_HUMAN	84.57	3	3	Carbamidomethylation	51725	Putative uncharacterized protein DKFZp686P15220 OS=Homo sapiens GN=DKFZp686P15220 PE=1 SV=1
18	101	tr|Q6MZV7|Q6MZV7_HUMAN	84.57	3	3	Carbamidomethylation	52121	Putative uncharacterized protein DKFZp686C11235 OS=Homo sapiens GN=DKFZp686C11235 PE=1 SV=1
18	102	tr|Q6MZQ6|Q6MZQ6_HUMAN	84.57	3	3	Carbamidomethylation	52043	Putative uncharacterized protein DKFZp686G11190 OS=Homo sapiens GN=DKFZp686G11190 PE=1 SV=1
18	104	tr|Q5EFE5|Q5EFE5_HUMAN	84.57	3	3	Carbamidomethylation	52363	Anti-RhD monoclonal T125 gamma1 heavy chain OS=Homo sapiens PE=2 SV=1
18	105	tr|Q6N094|Q6N094_HUMAN	84.57	3	3	Carbamidomethylation	52613	Putative uncharacterized protein DKFZp686O01196 OS=Homo sapiens GN=DKFZp686O01196 PE=1 SV=1
18	106	tr|Q6N097|Q6N097_HUMAN	84.57	3	3	Carbamidomethylation	52759	Putative uncharacterized protein DKFZp686H20196 OS=Homo sapiens GN=DKFZp686H20196 PE=2 SV=1
18	107	tr|Q7Z351|Q7Z351_HUMAN	84.57	3	3	Carbamidomethylation	52852	Putative uncharacterized protein DKFZp686N02209 OS=Homo sapiens GN=DKFZp686N02209 PE=2 SV=1
40	112	P62805|H4_HUMAN	36.22	1	1		11367	Histone H4 OS=Homo sapiens GN=HIST1H4A PE=1 SV=2
40	113	tr|Q0VAS5|Q0VAS5_HUMAN	36.22	1	1		11314	Histone H4 OS=Homo sapiens GN=HIST1H4H PE=2 SV=1
40	114	tr|B2R4R0|B2R4R0_HUMAN	36.22	1	1		11367	Histone H4 OS=Homo sapiens GN=HIST1H4J PE=2 SV=1
3	136	tr|D9YZU5|D9YZU5_HUMAN	103.22	9	8	Oxidation (M); Mutation	15998	Hemoglobin beta OS=Homo sapiens GN=HBB PE=2 SV=1
3	137	P68871|HBB_HUMAN	100.24	6	6	Oxidation (M)	15998	Hemoglobin subunit beta OS=Homo sapiens GN=HBB PE=1 SV=2
17	142	P02533|K1C14_HUMAN	85.68	5	3		51562	Keratin type I cytoskeletal 14 OS=Homo sapiens GN=KRT14 PE=1 SV=4
5	143	P08779|K1C16_HUMAN	164.1	26	14	Carbamidomethylation; Oxidation (M)	51268	Keratin type I cytoskeletal 16 OS=Homo sapiens GN=KRT16 PE=1 SV=4
45	205	tr|Q6PJF2|Q6PJF2_HUMAN	62.63	2	2	Carbamidomethylation	25521	IGK@ protein OS=Homo sapiens GN=IGK@ PE=1 SV=1
45	206	tr|Q6PIL8|Q6PIL8_HUMAN	62.63	2	2	Carbamidomethylation	25834	IGK@ protein OS=Homo sapiens GN=IGK@ PE=1 SV=1
45	208	tr|Q6P5S8|Q6P5S8_HUMAN	62.63	2	2	Carbamidomethylation	25773	IGK@ protein OS=Homo sapiens GN=IGK@ PE=1 SV=1
32	238	tr|B7ZAF0|B7ZAF0_HUMAN	110.33	6	6	Carbamidomethylation	46566	cDNA FLJ79164 highly similar to Tubulin beta-7 chain OS=Homo sapiens PE=2 SV=1
32	240	tr|Q5JP53|Q5JP53_HUMAN	110.33	6	6	Carbamidomethylation	47767	Tubulin beta chain OS=Homo sapiens GN=TUBB PE=3 SV=1
32	241	tr|F8VW92|F8VW92_HUMAN	110.33	6	6	Carbamidomethylation	48519	Tubulin beta chain OS=Homo sapiens GN=TUBB PE=2 SV=1
32	242	tr|F8VYX6|F8VYX6_HUMAN	110.33	6	6	Carbamidomethylation	48461	Tubulin beta chain OS=Homo sapiens GN=TUBB PE=3 SV=1
32	244	tr|Q5SU16|Q5SU16_HUMAN	110.33	6	6	Carbamidomethylation	49671	Beta 5-tubulin OS=Homo sapiens GN=TUBB PE=2 SV=1
32	246	tr|Q8IWP6|Q8IWP6_HUMAN	110.33	6	6	Carbamidomethylation	49753	Class IVb beta tubulin OS=Homo sapiens PE=2 SV=1
32	247	tr|Q8IZ29|Q8IZ29_HUMAN	110.33	6	6	Carbamidomethylation	49840	Tubulin beta 2C OS=Homo sapiens GN=TUBB2C PE=2 SV=1
36	250	tr|Q53SB5|Q53SB5_HUMAN	83.28	5	5		53536	Desmin isoform CRA_a OS=Homo sapiens GN=tmp_locus_29 PE=2 SV=1
36	251	tr|Q9H319|Q9H319_HUMAN	83.28	5	5		53566	Mutant desmin OS=Homo sapiens PE=2 SV=1
36	252	tr|A5Z217|A5Z217_HUMAN	83.28	5	5		53596	Mutant desmin OS=Homo sapiens PE=2 SV=1
36	253	P17661|DESM_HUMAN	83.28	5	5		53536	Desmin OS=Homo sapiens GN=DES PE=1 SV=3
36	254	tr|Q45VM8|Q45VM8_HUMAN	83.28	5	5		53579	Mutant desmin OS=Homo sapiens PE=2 SV=1
36	255	tr|Q45VM7|Q45VM7_HUMAN	83.28	5	5		53584	Mutant desmin OS=Homo sapiens PE=2 SV=1
36	256	tr|Q45VM6|Q45VM6_HUMAN	83.28	5	5		53535	Mutant desmin OS=Homo sapiens PE=2 SV=1
24	257	P12110|CO6A2_HUMAN	59.31	3	3		108579	Collagen alpha-2(VI) chain OS=Homo sapiens GN=COL6A2 PE=1 SV=4
58	270	tr|E9M4D4|E9M4D4_HUMAN	27.79	1	1		10783	Hemoglobin alpha-1 globin chain (Fragment) OS=Homo sapiens GN=HBA1 PE=3 SV=1
58	271	tr|Q4ZGM8|Q4ZGM8_HUMAN	27.79	1	1		10796	Hemoglobin alpha-2 globin mutant (Fragment) OS=Homo sapiens PE=2 SV=1
11	272	P69905|HBA_HUMAN	86.68	3	3	Oxidation (M)	15258	Hemoglobin subunit alpha OS=Homo sapiens GN=HBA1 PE=1 SV=2
11	273	tr|D1MGQ2|D1MGQ2_HUMAN	86.68	3	3	Oxidation (M)	15258	Alpha-2 globin chain OS=Homo sapiens GN=HBA2 PE=2 SV=1
11	274	tr|I1VZV6|I1VZV6_HUMAN	82.53	3	3	Oxidation (M)	15280	Hemoglobin alpha 1 OS=Homo sapiens GN=HBA1 PE=3 SV=1
70	282	P06733|ENOA_HUMAN	56.01	2	2		47169	Alpha-enolase OS=Homo sapiens GN=ENO1 PE=1 SV=2
26	301	tr|A3KPC7|A3KPC7_HUMAN	58.49	2	2		13906	Histone H2A OS=Homo sapiens GN=HIST1H2AH PE=2 SV=1
26	302	Q99878|H2A1J_HUMAN	58.49	2	2		13936	Histone H2A type 1-J OS=Homo sapiens GN=HIST1H2AJ PE=1 SV=3
26	303	Q96KK5|H2A1H_HUMAN	58.49	2	2		13906	Histone H2A type 1-H OS=Homo sapiens GN=HIST1H2AH PE=1 SV=3
26	304	Q9BTM1|H2AJ_HUMAN	58.49	2	2		14019	Histone H2A.J OS=Homo sapiens GN=H2AFJ PE=1 SV=1
26	305	Q16777|H2A2C_HUMAN	58.49	2	2		13988	Histone H2A type 2-C OS=Homo sapiens GN=HIST2H2AC PE=1 SV=4
26	306	tr|B2R5B3|B2R5B3_HUMAN	58.49	2	2		14111	Histone H2A OS=Homo sapiens PE=2 SV=1
26	307	Q6FI13|H2A2A_HUMAN	58.49	2	2		14095	Histone H2A type 2-A OS=Homo sapiens GN=HIST2H2AA3 PE=1 SV=3
26	308	P20671|H2A1D_HUMAN	58.49	2	2		14107	Histone H2A type 1-D OS=Homo sapiens GN=HIST1H2AD PE=1 SV=2
26	309	tr|B2R5B6|B2R5B6_HUMAN	58.49	2	2		14137	Histone H2A OS=Homo sapiens PE=2 SV=1
26	310	tr|A4FTV9|A4FTV9_HUMAN	58.49	2	2		14091	Histone H2A OS=Homo sapiens GN=HIST1H2AK PE=2 SV=1
26	311	P0C0S8|H2A1_HUMAN	58.49	2	2		14091	Histone H2A type 1 OS=Homo sapiens GN=HIST1H2AG PE=1 SV=2
51	318	tr|E7EUT5|E7EUT5_HUMAN	63.15	2	2		27871	Glyceraldehyde-3-phosphate dehydrogenase OS=Homo sapiens GN=GAPDH PE=2 SV=1
51	319	tr|E7EUT4|E7EUT4_HUMAN	63.15	2	2		31548	Glyceraldehyde-3-phosphate dehydrogenase OS=Homo sapiens GN=GAPDH PE=2 SV=1
51	320	P04406|G3P_HUMAN	63.15	2	2		36053	Glyceraldehyde-3-phosphate dehydrogenase OS=Homo sapiens GN=GAPDH PE=1 SV=3
43	321	tr|Q2TSD0|Q2TSD0_HUMAN	46.05	1	1		36049	Glyceraldehyde-3-phosphate dehydrogenase OS=Homo sapiens PE=2 SV=1
7	332	tr|D3DTX7|D3DTX7_HUMAN	99.07	6	2		84740	Collagen type I alpha 1 isoform CRA_a OS=Homo sapiens GN=COL1A1 PE=2 SV=1
68	442	tr|Q8TCJ5|Q8TCJ5_HUMAN	67.92	2	2	Carbamidomethylation	11266	Putative uncharacterized protein DKFZp667J0810 (Fragment) OS=Homo sapiens GN=DKFZp667J0810 PE=2 SV=1
68	444	tr|Q6PJR7|Q6PJR7_HUMAN	67.92	2	2	Carbamidomethylation	14678	IGL@ protein OS=Homo sapiens GN=IGL@ PE=2 SV=1
68	445	tr|C6KXN3|C6KXN3_HUMAN	67.92	2	2	Carbamidomethylation	24742	Lambda light chain of human immunoglobulin surface antigen-related protein (Fragment) OS=Homo sapiens GN=IgLC-rG PE=2 SV=1
68	447	tr|Q8N5F4|Q8N5F4_HUMAN	67.92	2	2	Carbamidomethylation	24961	IGL@ protein OS=Homo sapiens GN=IGL@ PE=2 SV=1
68	448	tr|Q6GMV8|Q6GMV8_HUMAN	67.92	2	2	Carbamidomethylation	24910	Putative uncharacterized protein OS=Homo sapiens PE=2 SV=1
68	449	tr|Q8N355|Q8N355_HUMAN	67.92	2	2	Carbamidomethylation	24793	IGL@ protein OS=Homo sapiens GN=IGL@ PE=2 SV=1
68	450	tr|Q7Z2U7|Q7Z2U7_HUMAN	67.92	2	2	Carbamidomethylation	25015	Putative uncharacterized protein OS=Homo sapiens PE=1 SV=1
68	451	tr|Q6GMW3|Q6GMW3_HUMAN	67.92	2	2	Carbamidomethylation	24654	IGL@ protein OS=Homo sapiens GN=IGL@ PE=2 SV=1
68	452	tr|Q6PJG0|Q6PJG0_HUMAN	67.92	2	2	Carbamidomethylation	24632	Putative uncharacterized protein OS=Homo sapiens PE=1 SV=1
68	453	tr|A2NUT2|A2NUT2_HUMAN	67.92	2	2	Carbamidomethylation	24655	Lambda-chain (AA -20 to 215) OS=Homo sapiens PE=2 SV=1
68	454	tr|Q567P1|Q567P1_HUMAN	67.92	2	2	Carbamidomethylation	24800	IGL@ protein OS=Homo sapiens GN=IGL@ PE=2 SV=1
68	455	tr|A0A5E4|A0A5E4_HUMAN	67.92	2	2	Carbamidomethylation	24747	Putative uncharacterized protein OS=Homo sapiens PE=2 SV=1
68	456	tr|Q6IN99|Q6IN99_HUMAN	67.92	2	2	Carbamidomethylation	24888	IGL@ protein OS=Homo sapiens GN=IGL@ PE=2 SV=1
68	457	tr|Q6PIQ7|Q6PIQ7_HUMAN	67.92	2	2	Carbamidomethylation	25021	IGL@ protein OS=Homo sapiens GN=IGL@ PE=2 SV=1
68	458	tr|Q8NEJ1|Q8NEJ1_HUMAN	67.92	2	2	Carbamidomethylation	25024	Putative uncharacterized protein OS=Homo sapiens PE=2 SV=1
68	459	tr|Q6GMX4|Q6GMX4_HUMAN	67.92	2	2	Carbamidomethylation	24810	IGL@ protein OS=Homo sapiens GN=IGL@ PE=1 SV=1
68	460	tr|Q6GMX3|Q6GMX3_HUMAN	67.92	2	2	Carbamidomethylation	24700	IGL@ protein OS=Homo sapiens GN=IGL@ PE=2 SV=1
68	461	tr|Q6IPQ0|Q6IPQ0_HUMAN	67.92	2	2	Carbamidomethylation	24824	IGL@ protein OS=Homo sapiens GN=IGL@ PE=2 SV=1
54	493	tr|K7EK07|K7EK07_HUMAN	68.78	3	2	Carbamidomethylation; Mutation	14914	Histone H3 (Fragment) OS=Homo sapiens GN=H3F3B PE=3 SV=1
71	494	Q71DI3|H32_HUMAN	61.86	2	1	Carbamidomethylation	15388	Histone H3.2 OS=Homo sapiens GN=HIST2H3A PE=1 SV=3
54	496	tr|B2R4P9|B2R4P9_HUMAN	68.78	3	2	Carbamidomethylation; Mutation	15328	Histone H3 OS=Homo sapiens GN=H3F3A PE=2 SV=1
54	497	P84243|H33_HUMAN	68.78	3	2	Carbamidomethylation; Mutation	15328	Histone H3.3 OS=Homo sapiens GN=H3F3A PE=1 SV=2
72	498	P68431|H31_HUMAN	47.77	2	1	Carbamidomethylation	15404	Histone H3.1 OS=Homo sapiens GN=HIST1H3A PE=1 SV=2
54	499	tr|B2R6Y1|B2R6Y1_HUMAN	68.78	3	2	Carbamidomethylation; Mutation	15314	Histone H3 OS=Homo sapiens PE=2 SV=1
31	520	Q7Z794|K2C1B_HUMAN	59.79	4	1		61901	Keratin type II cytoskeletal 1b OS=Homo sapiens GN=KRT77 PE=2 SV=3
9	526	P02538|K2C6A_HUMAN	90.1	5	3		60045	Keratin type II cytoskeletal 6A OS=Homo sapiens GN=KRT6A PE=1 SV=3
26	538	P0C0S5|H2AZ_HUMAN	58.49	2	2		13553	Histone H2A.Z OS=Homo sapiens GN=H2AFZ PE=1 SV=2
26	539	Q71UI9|H2AV_HUMAN	58.49	2	2		13509	Histone H2A.V OS=Homo sapiens GN=H2AFV PE=1 SV=3
2	544	P08123|CO1A2_HUMAN	113.96	11	11		129314	Collagen alpha-2(I) chain OS=Homo sapiens GN=COL1A2 PE=1 SV=7
73	574	P63104|1433Z_HUMAN	46.12	2	2		27745	14-3-3 protein zeta/delta OS=Homo sapiens GN=YWHAZ PE=1 SV=1
73	575	tr|D0PNI1|D0PNI1_HUMAN	46.12	2	2		27745	Tyrosine 3-monooxygenase/tryptophan 5-monooxygenase activation protein zeta polypeptide OS=Homo sapiens GN=YWHAZ PE=2 SV=1
73	576	tr|E7EX29|E7EX29_HUMAN	46.12	2	2		28037	14-3-3 protein zeta/delta (Fragment) OS=Homo sapiens GN=YWHAZ PE=2 SV=1
30	592	tr|Q8IZI0|Q8IZI0_HUMAN	74.02	5	5	Oxidation (M)	11505	Hemoglobin beta chain variant Hb-I_Toulouse (Fragment) OS=Homo sapiens GN=HBB PE=2 SV=1
3	599	tr|Q6V0K9|Q6V0K9_HUMAN	101.37	8	7	Oxidation (M); Mutation	11474	Mutant hemoglobin beta chain (Fragment) OS=Homo sapiens GN=HBB PE=2 SV=1
30	600	tr|Q9BWU5|Q9BWU5_HUMAN	71.34	5	5	Oxidation (M)	11501	Mutant hemoglobin beta chain (Fragment) OS=Homo sapiens GN=HBB PE=2 SV=1
3	602	tr|E9NGZ5|E9NGZ5_HUMAN	101.37	8	7	Oxidation (M); Mutation	11494	Hemoglobin beta globin chain (Fragment) OS=Homo sapiens GN=HBB PE=3 SV=1
3	603	tr|Q9BWV6|Q9BWV6_HUMAN	101.37	8	7	Oxidation (M); Mutation	12234	Mutant beta globin OS=Homo sapiens GN=HBB PE=2 SV=1
3	605	tr|B3VL86|B3VL86_HUMAN	101.37	8	7	Oxidation (M); Mutation	14956	Mutant beta-globin OS=Homo sapiens GN=HBB PE=3 SV=1
20	609	tr|B2R4S9|B2R4S9_HUMAN	90.67	4	4	Mutation	13906	Histone H2B OS=Homo sapiens GN=HIST1H2BF PE=2 SV=1
38	610	tr|Q0D2M2|Q0D2M2_HUMAN	92.23	5	5	Oxidation (M); Mutation	13834	HIST1H2BC protein OS=Homo sapiens GN=HIST1H2BC PE=2 SV=1
20	611	Q16778|H2B2E_HUMAN	90.67	4	4	Mutation	13920	Histone H2B type 2-E OS=Homo sapiens GN=HIST2H2BE PE=1 SV=3
20	612	P62807|H2B1C_HUMAN	90.67	4	4	Mutation	13906	Histone H2B type 1-C/E/F/G/I OS=Homo sapiens GN=HIST1H2BC PE=1 SV=4
20	613	Q99880|H2B1L_HUMAN	90.67	4	4	Mutation	13952	Histone H2B type 1-L OS=Homo sapiens GN=HIST1H2BL PE=1 SV=3
20	614	P06899|H2B1J_HUMAN	90.67	4	4	Mutation	13904	Histone H2B type 1-J OS=Homo sapiens GN=HIST1H2BJ PE=1 SV=3
20	615	Q99879|H2B1M_HUMAN	90.67	4	4	Mutation	13989	Histone H2B type 1-M OS=Homo sapiens GN=HIST1H2BM PE=1 SV=3
5	616	tr|A8K9J7|A8K9J7_HUMAN	122.01	6	6	Oxidation (M); Mutation	13996	Histone H2B OS=Homo sapiens PE=2 SV=1
20	617	P57053|H2BFS_HUMAN	90.67	4	4	Mutation	13944	Histone H2B type F-S OS=Homo sapiens GN=H2BFS PE=1 SV=2
20	618	Q5QNW6|H2B2F_HUMAN	90.67	4	4	Mutation	13920	Histone H2B type 2-F OS=Homo sapiens GN=HIST2H2BF PE=1 SV=3
20	619	P58876|H2B1D_HUMAN	90.67	4	4	Mutation	13936	Histone H2B type 1-D OS=Homo sapiens GN=HIST1H2BD PE=1 SV=2
20	620	P33778|H2B1B_HUMAN	90.67	4	4	Mutation	13950	Histone H2B type 1-B OS=Homo sapiens GN=HIST1H2BB PE=1 SV=2
20	621	Q93079|H2B1H_HUMAN	90.67	4	4	Mutation	13892	Histone H2B type 1-H OS=Homo sapiens GN=HIST1H2BH PE=1 SV=3
20	622	Q99877|H2B1N_HUMAN	90.67	4	4	Mutation	13922	Histone H2B type 1-N OS=Homo sapiens GN=HIST1H2BN PE=1 SV=3
20	623	P23527|H2B1O_HUMAN	90.67	4	4	Mutation	13906	Histone H2B type 1-O OS=Homo sapiens GN=HIST1H2BO PE=1 SV=3
20	624	O60814|H2B1K_HUMAN	90.67	4	4	Mutation	13890	Histone H2B type 1-K OS=Homo sapiens GN=HIST1H2BK PE=1 SV=3
20	626	tr|I6L9F7|I6L9F7_HUMAN	90.67	4	4	Mutation	15157	Histone H2B (Fragment) OS=Homo sapiens GN=HIST1H2BM PE=2 SV=1
20	627	tr|B4DR52|B4DR52_HUMAN	90.67	4	4	Mutation	18041	Histone H2B OS=Homo sapiens GN=HIST2H2BF PE=2 SV=1
28	637	tr|F8WCH0|F8WCH0_HUMAN	32.28	1	1		5570	Actin gamma-enteric smooth muscle OS=Homo sapiens GN=ACTG2 PE=2 SV=1
11	698	tr|G3V1N2|G3V1N2_HUMAN	83.33	3	3	Oxidation (M)	11948	HCG1745306 isoform CRA_a OS=Homo sapiens GN=HBA2 PE=3 SV=1
21	700	tr|Q6FHG6|Q6FHG6_HUMAN	43.4	2	2		43783	PRELP protein (Fragment) OS=Homo sapiens GN=PRELP PE=2 SV=1
21	701	P51888|PRELP_HUMAN	43.4	2	2		43810	Prolargin OS=Homo sapiens GN=PRELP PE=1 SV=1
26	824	tr|C9J0D1|C9J0D1_HUMAN	58.49	2	2		13163	Histone H2A OS=Homo sapiens GN=H2AFV PE=2 SV=1
26	825	Q93077|H2A1C_HUMAN	58.49	2	2		14105	Histone H2A type 1-C OS=Homo sapiens GN=HIST1H2AC PE=1 SV=3
26	826	tr|Q08AJ9|Q08AJ9_HUMAN	58.49	2	2		14135	Histone H2A OS=Homo sapiens GN=HIST1H2AB PE=2 SV=1
26	827	Q7L7L0|H2A3_HUMAN	58.49	2	2		14121	Histone H2A type 3 OS=Homo sapiens GN=HIST3H2A PE=1 SV=3
26	828	P04908|H2A1B_HUMAN	58.49	2	2		14135	Histone H2A type 1-B/E OS=Homo sapiens GN=HIST1H2AB PE=1 SV=2
26	829	Q96QV6|H2A1A_HUMAN	58.49	2	2		14233	Histone H2A type 1-A OS=Homo sapiens GN=HIST1H2AA PE=1 SV=3
26	830	P16104|H2AX_HUMAN	58.49	2	2		15145	Histone H2A.x OS=Homo sapiens GN=H2AFX PE=1 SV=2
58	855	tr|Q8N532|Q8N532_HUMAN	72.25	2	2		36649	TUBA1C protein OS=Homo sapiens GN=TUBA1C PE=2 SV=1
46	859	tr|B3KT06|B3KT06_HUMAN	29.6	1	1		46341	cDNA FLJ37398 fis clone BRAMY2027467 highly similar to Tubulin alpha-ubiquitous chain OS=Homo sapiens PE=2 SV=1
58	860	tr|G3V1U9|G3V1U9_HUMAN	72.25	2	2		46297	Tubulin alpha-1A chain OS=Homo sapiens GN=TUBA1A PE=2 SV=1
58	861	tr|B3KPS3|B3KPS3_HUMAN	72.25	2	2		46241	cDNA FLJ32131 fis clone PEBLM2000267 highly similar to Tubulin alpha-ubiquitous chain OS=Homo sapiens PE=2 SV=1
58	862	Q9BQE3|TBA1C_HUMAN	72.25	2	2		49895	Tubulin alpha-1C chain OS=Homo sapiens GN=TUBA1C PE=1 SV=1
58	863	tr|Q53GA7|Q53GA7_HUMAN	72.25	2	2		49823	Tubulin alpha 6 variant (Fragment) OS=Homo sapiens PE=2 SV=1
58	867	Q71U36|TBA1A_HUMAN	72.25	2	2		50136	Tubulin alpha-1A chain OS=Homo sapiens GN=TUBA1A PE=1 SV=1
58	868	tr|A8JZY9|A8JZY9_HUMAN	72.25	2	2		50136	cDNA FLJ78587 OS=Homo sapiens PE=2 SV=1
58	869	P68363|TBA1B_HUMAN	72.25	2	2		50152	Tubulin alpha-1B chain OS=Homo sapiens GN=TUBA1B PE=1 SV=1
58	870	tr|F5H5D3|F5H5D3_HUMAN	72.25	2	2		57730	Tubulin alpha-1C chain OS=Homo sapiens GN=TUBA1C PE=2 SV=1
64	966	tr|Q6IQ15|Q6IQ15_HUMAN	30.03	1	1		47869	EEF1A1 protein OS=Homo sapiens GN=EEF1A1 PE=2 SV=1
64	975	tr|Q53GE9|Q53GE9_HUMAN	30.03	1	1		50111	Elongation factor 1-alpha (Fragment) OS=Homo sapiens PE=2 SV=1
64	977	tr|Q53GA1|Q53GA1_HUMAN	30.03	1	1		50111	Elongation factor 1-alpha (Fragment) OS=Homo sapiens PE=2 SV=1
5	1023	P02452|CO1A1_HUMAN	93.03	8	4	Oxidation (M)	138942	Collagen alpha-1(I) chain OS=Homo sapiens GN=COL1A1 PE=1 SV=5
20	1026	Q8N257|H2B3B_HUMAN	90.67	4	4	Mutation	13908	Histone H2B type 3-B OS=Homo sapiens GN=HIST3H2BB PE=1 SV=3
10	1029	P51884|LUM_HUMAN	95.27	3	3		38429	Lumican OS=Homo sapiens GN=LUM PE=1 SV=2
8	1100	P13647|K2C5_HUMAN	94.36	4	2		62378	Keratin type II cytoskeletal 5 OS=Homo sapiens GN=KRT5 PE=1 SV=3
39	1106	tr|Q8TBN2|Q8TBN2_HUMAN	28.08	1	1		47704	Putative uncharacterized protein (Fragment) OS=Homo sapiens PE=2 SV=1
39	1107	P12109|CO6A1_HUMAN	28.08	1	1		108529	Collagen alpha-1(VI) chain OS=Homo sapiens GN=COL6A1 PE=1 SV=3
25	1237	Q05707|COEA1_HUMAN	57.72	3	3		193513	Collagen alpha-1(XIV) chain OS=Homo sapiens GN=COL14A1 PE=1 SV=3
35	1425	P04792|HSPB1_HUMAN	108.33	5	5		22783	Heat shock protein beta-1 OS=Homo sapiens GN=HSPB1 PE=1 SV=2
32	1468	P07437|TBB5_HUMAN	110.33	6	6	Carbamidomethylation	49671	Tubulin beta chain OS=Homo sapiens GN=TUBB PE=1 SV=2
79	1532	tr|Q59EM9|Q59EM9_HUMAN	40.64	1	1		147335	Ubiquitin C variant (Fragment) OS=Homo sapiens PE=2 SV=1
58	1533	tr|B7Z1K5|B7Z1K5_HUMAN	72.25	2	2		57760	cDNA FLJ55956 highly similar to Tubulin alpha-6 chain OS=Homo sapiens PE=2 SV=1
32	1662	P68371|TBB4B_HUMAN	110.33	6	6	Carbamidomethylation	49831	Tubulin beta-4B chain OS=Homo sapiens GN=TUBB4B PE=1 SV=1
4	1864	tr|E9PCV6|E9PCV6_HUMAN	123.45	14	14		322000	Collagen alpha-3(VI) chain OS=Homo sapiens GN=COL6A3 PE=2 SV=1
4	1867	tr|D9ZGF2|D9ZGF2_HUMAN	122.43	14	14		343668	Collagen type VI alpha 3 OS=Homo sapiens GN=COL6A3 PE=2 SV=1
4	1868	P12111|CO6A3_HUMAN	122.43	14	14		343668	Collagen alpha-3(VI) chain OS=Homo sapiens GN=COL6A3 PE=1 SV=5
30	1890	P06702|S10A9_HUMAN	94.82	3	3		13242	Protein S100-A9 OS=Homo sapiens GN=S100A9 PE=1 SV=1
81	1901	P05109|S10A8_HUMAN	33.31	1	1		10835	Protein S100-A8 OS=Homo sapiens GN=S100A8 PE=1 SV=1
23	1936	tr|Q3BDU5|Q3BDU5_HUMAN	58.14	1	1		55638	Rhabdomyosarcoma antigen MU-RMS-40.12 OS=Homo sapiens PE=2 SV=1
23	1937	tr|Q6UYC3|Q6UYC3_HUMAN	58.14	1	1		69249	Lamin A/C OS=Homo sapiens GN=LMNA PE=2 SV=1
23	1938	P02545|LMNA_HUMAN	58.14	1	1		74140	Prelamin-A/C OS=Homo sapiens GN=LMNA PE=1 SV=1
23	1939	tr|Q5I6Y6|Q5I6Y6_HUMAN	58.14	1	1		74082	Lamin A/C transcript variant 1 OS=Homo sapiens GN=LMNA PE=2 SV=1
43	3371	tr|H0YMD0|H0YMD0_HUMAN	33.57	1	1		25342	Annexin (Fragment) OS=Homo sapiens GN=ANXA2 PE=3 SV=1
43	3372	tr|H0YMU9|H0YMU9_HUMAN	33.57	1	1		25569	Annexin OS=Homo sapiens GN=ANXA2 PE=3 SV=1
43	3374	tr|H0YN42|H0YN42_HUMAN	33.57	1	1		28825	Annexin (Fragment) OS=Homo sapiens GN=ANXA2 PE=3 SV=1
43	3375	P07355|ANXA2_HUMAN	33.57	1	1		38604	Annexin A2 OS=Homo sapiens GN=ANXA2 PE=1 SV=2
30	3444	tr|B2R4M6|B2R4M6_HUMAN	94.82	3	3		13210	cDNA FLJ92148 highly similar to Homo sapiens S100 calcium binding protein A9 (calgranulin B) (S100A9) mRNA OS=Homo sapiens PE=2 SV=1
41	3453	tr|Q06AH7|Q06AH7_HUMAN	86.32	3	3	Carbamidomethylation	76960	Transferrin OS=Homo sapiens GN=TF PE=2 SV=1
4	3658	tr|B7ZW00|B7ZW00_HUMAN	123.45	14	14		278209	COL6A3 protein OS=Homo sapiens GN=COL6A3 PE=2 SV=1
4	3666	tr|E7ENL6|E7ENL6_HUMAN	122.43	14	14		322186	Collagen alpha-3(VI) chain OS=Homo sapiens GN=COL6A3 PE=2 SV=1
48	5128	tr|D6RBL5|D6RBL5_HUMAN	35.07	1	1		29337	Annexin OS=Homo sapiens GN=ANXA5 PE=2 SV=1
48	5130	P08758|ANXA5_HUMAN	35.07	1	1		35937	Annexin A5 OS=Homo sapiens GN=ANXA5 PE=1 SV=2
28	6748	tr|G5E9R0|G5E9R0_HUMAN	32.28	1	1		13859	Actin cytoplasmic 1 OS=Homo sapiens GN=ACTB PE=2 SV=1
32	6752	tr|Q5ST81|Q5ST81_HUMAN	110.33	6	6	Carbamidomethylation	41742	Tubulin beta chain OS=Homo sapiens GN=TUBB PE=3 SV=1
41	7297	tr|J3KN47|J3KN47_HUMAN	86.32	3	3	Carbamidomethylation	63421	Serotransferrin OS=Homo sapiens GN=TF PE=4 SV=1
41	7298	tr|B4DI57|B4DI57_HUMAN	86.32	3	3	Carbamidomethylation	63437	cDNA FLJ54111 highly similar to Serotransferrin OS=Homo sapiens PE=2 SV=1
41	7300	tr|Q53H26|Q53H26_HUMAN	86.32	3	3	Carbamidomethylation	77080	Transferrin variant (Fragment) OS=Homo sapiens PE=2 SV=1
42	7301	P02787|TRFE_HUMAN	28.5	1	1	Carbamidomethylation	77064	Serotransferrin OS=Homo sapiens GN=TF PE=1 SV=3
1	48412	tr|A0A087WTA8|A0A087WTA8_HUMAN	101.93	8	8		129151	Collagen alpha-2(I) chain OS=Homo sapiens OX=9606 GN=COL1A2 PE=1 SV=1
1	48413	sp|P08123|CO1A2_HUMAN	100.3	8	8		129314	Collagen alpha-2(I) chain OS=Homo sapiens OX=9606 GN=COL1A2 PE=1 SV=7
27	48414	sp|P60709|ACTB_HUMAN	30.55	1	1		41737	Actin cytoplasmic 1 OS=Homo sapiens OX=9606 GN=ACTB PE=1 SV=1
28	48415	sp|P63261|ACTG_HUMAN	32.28	1	1		41793	Actin cytoplasmic 2 OS=Homo sapiens OX=9606 GN=ACTG1 PE=1 SV=1
28	48416	sp|P63267|ACTH_HUMAN	32.28	1	1		41877	Actin gamma-enteric smooth muscle OS=Homo sapiens OX=9606 GN=ACTG2 PE=1 SV=1
28	48417	sp|P68032|ACTC_HUMAN	32.28	1	1		42019	Actin alpha cardiac muscle 1 OS=Homo sapiens OX=9606 GN=ACTC1 PE=1 SV=1
28	48418	sp|P62736|ACTA_HUMAN	32.28	1	1		42009	Actin aortic smooth muscle OS=Homo sapiens OX=9606 GN=ACTA2 PE=1 SV=1
28	48419	sp|P68133|ACTS_HUMAN	32.28	1	1		42051	Actin alpha skeletal muscle OS=Homo sapiens OX=9606 GN=ACTA1 PE=1 SV=1
28	48420	tr|A6NL76|A6NL76_HUMAN	32.28	1	1		28165	Actin alpha skeletal muscle OS=Homo sapiens OX=9606 GN=ACTA1 PE=1 SV=3
28	48421	tr|A0A2R8Y793|A0A2R8Y793_HUMAN	32.28	1	1		34142	Actin cytoplasmic 1 (Fragment) OS=Homo sapiens OX=9606 GN=ACTB PE=1 SV=1
28	48424	tr|E7EVS6|E7EVS6_HUMAN	32.28	1	1		17878	Actin cytoplasmic 1 (Fragment) OS=Homo sapiens OX=9606 GN=ACTB PE=1 SV=8
28	48425	tr|A0A2R8YGF8|A0A2R8YGF8_HUMAN	32.28	1	1		18089	Actin cytoplasmic 1 (Fragment) OS=Homo sapiens OX=9606 GN=ACTB PE=1 SV=1
28	48426	tr|C9JFL5|C9JFL5_HUMAN	32.28	1	1		16158	Actin gamma-enteric smooth muscle (Fragment) OS=Homo sapiens OX=9606 GN=ACTG2 PE=1 SV=8
28	48427	tr|I3L4N8|I3L4N8_HUMAN	32.28	1	1		26878	Actin cytoplasmic 2 (Fragment) OS=Homo sapiens OX=9606 GN=ACTG1 PE=1 SV=8
42	48439	sp|P13647|K2C5_HUMAN	42.92	1	1	Mutation	62378	Keratin type II cytoskeletal 5 OS=Homo sapiens OX=9606 GN=KRT5 PE=1 SV=3
28	48442	tr|C9JUM1|C9JUM1_HUMAN	32.28	1	1		10634	Actin cytoplasmic 1 (Fragment) OS=Homo sapiens OX=9606 GN=ACTB PE=1 SV=2
28	48443	tr|C9JZR7|C9JZR7_HUMAN	32.28	1	1		11295	Actin cytoplasmic 1 (Fragment) OS=Homo sapiens OX=9606 GN=ACTB PE=1 SV=8
28	48447	sp|Q6S8J3|POTEE_HUMAN	32.28	1	1		121363	POTE ankyrin domain family member E OS=Homo sapiens OX=9606 GN=POTEE PE=2 SV=3
28	48448	sp|P0CG38|POTEI_HUMAN	32.28	1	1		121282	POTE ankyrin domain family member I OS=Homo sapiens OX=9606 GN=POTEI PE=3 SV=1
28	48449	sp|A5A3E0|POTEF_HUMAN	32.28	1	1		121444	POTE ankyrin domain family member F OS=Homo sapiens OX=9606 GN=POTEF PE=1 SV=2
25	48480	sp|Q99878|H2A1J_HUMAN	38.2	1	1		13936	Histone H2A type 1-J OS=Homo sapiens OX=9606 GN=H2AC14 PE=1 SV=3
27	48481	sp|Q96KK5|H2A1H_HUMAN	37.13	1	1		13906	Histone H2A type 1-H OS=Homo sapiens OX=9606 GN=HIST1H2AH PE=1 SV=3
15	48483	sp|Q16777|H2A2C_HUMAN	42.31	1	1		13988	Histone H2A type 2-C OS=Homo sapiens OX=9606 GN=HIST2H2AC PE=1 SV=4
27	48484	sp|Q9BTM1|H2AJ_HUMAN	37.13	1	1		14019	Histone H2A.J OS=Homo sapiens OX=9606 GN=H2AFJ PE=1 SV=1
27	48485	sp|Q93077|H2A1C_HUMAN	37.13	1	1		14105	Histone H2A type 1-C OS=Homo sapiens OX=9606 GN=HIST1H2AC PE=1 SV=3
25	48486	sp|P20671|H2A1D_HUMAN	38.2	1	1		14107	Histone H2A type 1-D OS=Homo sapiens OX=9606 GN=H2AC7 PE=1 SV=2
15	48487	sp|Q6FI13|H2A2A_HUMAN	42.31	1	1		14095	Histone H2A type 2-A OS=Homo sapiens OX=9606 GN=HIST2H2AA3 PE=1 SV=3
25	48488	sp|P0C0S8|H2A1_HUMAN	38.2	1	1		14091	Histone H2A type 1 OS=Homo sapiens OX=9606 GN=H2AC11 PE=1 SV=2
27	48490	sp|P04908|H2A1B_HUMAN	37.13	1	1		14135	Histone H2A type 1-B/E OS=Homo sapiens OX=9606 GN=H2AC4 PE=1 SV=2
27	48492	tr|A0A3B3IS11|A0A3B3IS11_HUMAN	37.13	1	1		15407	Histone H2A OS=Homo sapiens OX=9606 PE=3 SV=1
27	48493	sp|P16104|H2AX_HUMAN	37.13	1	1		15145	Histone H2AX OS=Homo sapiens OX=9606 GN=H2AX PE=1 SV=2
27	48494	tr|A0A0U1RR32|A0A0U1RR32_HUMAN	37.13	1	1		18482	Histone H2A OS=Homo sapiens OX=9606 GN=hCG_2039566 PE=3 SV=1
27	48495	tr|A0A0U1RRH7|A0A0U1RRH7_HUMAN	37.13	1	1		18553	Histone H2A OS=Homo sapiens OX=9606 PE=3 SV=1
1	48503	sp|P02538|K2C6A_HUMAN	87.79	6	1	Mutation	60045	Keratin type II cytoskeletal 6A OS=Homo sapiens OX=9606 GN=KRT6A PE=1 SV=3
2	48504	sp|P48668|K2C6C_HUMAN	87.59	6	1	Mutation	60025	Keratin type II cytoskeletal 6C OS=Homo sapiens OX=9606 GN=KRT6C PE=1 SV=3
27	48549	sp|Q8IUE6|H2A2B_HUMAN	37.13	1	1		13995	Histone H2A type 2-B OS=Homo sapiens OX=9606 GN=HIST2H2AB PE=1 SV=3
23	48667	tr|H0YAB0|H0YAB0_HUMAN	58.14	1	1		20796	Prelamin-A/C (Fragment) OS=Homo sapiens OX=9606 GN=LMNA PE=1 SV=1
27	48770	tr|Q5TCU3|Q5TCU3_HUMAN	45.94	1	1		32815	Tropomyosin beta chain OS=Homo sapiens OX=9606 GN=TPM2 PE=1 SV=1
9	51936	sp|Q5CZC0|FSIP2_HUMAN	23.52	1	1		780624	Fibrous sheath-interacting protein 2 OS=Homo sapiens OX=9606 GN=FSIP2 PE=2 SV=4
31	56029	P02461|CO3A1_HUMAN	63.13	1	1		138564	Collagen alpha-1(III) chain OS=Homo sapiens OX=9606 GN=COL3A1 PE=1 SV=4
82	56939	P12107|COBA1_HUMAN	28.82	1	1		181064	Collagen alpha-1(XI) chain OS=Homo sapiens OX=9606 GN=COL11A1 PE=1 SV=4
61	62378	P14618|KPYM_HUMAN	74.95	2	2		57937	Pyruvate kinase PKM OS=Homo sapiens OX=9606 GN=PKM PE=1 SV=4
31	68471	tr|D2JYH5|D2JYH5_HUMAN	63.13	1	1		138564	Collagen type III alpha 1 OS=Homo sapiens GN=COL3A1 PE=2 SV=1
23	68472	tr|Q8N519|Q8N519_HUMAN	58.14	1	1		53197	LMNA protein OS=Homo sapiens PE=2 SV=1
23	68473	tr|Q5TCJ4|Q5TCJ4_HUMAN	58.14	1	1		53250	Lamin A/C OS=Homo sapiens GN=LMNA PE=2 SV=1
23	68474	tr|Q5I6Y5|Q5I6Y5_HUMAN	58.14	1	1		55044	Lamin A/C transcript variant 1 OS=Homo sapiens GN=LMNA PE=2 SV=1
23	68475	tr|Q5TCI8|Q5TCI8_HUMAN	58.14	1	1		55762	Lamin A/C OS=Homo sapiens GN=LMNA PE=3 SV=1
23	68476	tr|Q5TCI9|Q5TCI9_HUMAN	58.14	1	1		57875	Lamin A/C (Fragment) OS=Homo sapiens GN=LMNA PE=2 SV=1
23	68477	tr|D6RAQ3|D6RAQ3_HUMAN	58.14	1	1		62853	Prelamin-A/C OS=Homo sapiens GN=LMNA PE=2 SV=1
23	68478	tr|Q5I6Y4|Q5I6Y4_HUMAN	58.14	1	1		74070	Lamin A/C transcript variant 1 OS=Homo sapiens GN=LMNA PE=2 SV=1
27	68483	tr|K7ERG3|K7ERG3_HUMAN	45.94	1	1		19307	Tropomyosin alpha-4 chain (Fragment) OS=Homo sapiens GN=TPM4 PE=4 SV=1
27	68484	tr|K7ENT6|K7ENT6_HUMAN	45.94	1	1		20621	Tropomyosin alpha-4 chain (Fragment) OS=Homo sapiens GN=TPM4 PE=4 SV=1
27	68485	tr|B4DGC2|B4DGC2_HUMAN	45.94	1	1		21833	cDNA FLJ56690 highly similar to Tropomyosin beta chain OS=Homo sapiens PE=2 SV=1
27	68486	tr|B4DVY2|B4DVY2_HUMAN	45.94	1	1		26221	cDNA FLJ54184 highly similar to Tropomyosin alpha-4 chain OS=Homo sapiens PE=2 SV=1
27	68487	P67936|TPM4_HUMAN	45.94	1	1		28522	Tropomyosin alpha-4 chain OS=Homo sapiens GN=TPM4 PE=1 SV=3
27	68488	tr|A7XZE4|A7XZE4_HUMAN	45.94	1	1		33026	Beta tropomyosin isoform OS=Homo sapiens GN=TPM2b PE=2 SV=1
27	68489	P07951|TPM2_HUMAN	45.94	1	1		32851	Tropomyosin beta chain OS=Homo sapiens GN=TPM2 PE=1 SV=1
27	68490	tr|B4E3P1|B4E3P1_HUMAN	45.94	1	1		34098	cDNA FLJ57036 highly similar to Homo sapiens tropomyosin 2 (beta) (TPM2) transcript variant 2 mRNA OS=Homo sapiens PE=2 SV=1
27	68491	tr|Q5TCU8|Q5TCU8_HUMAN	45.94	1	1		36747	Tropomyosin beta chain OS=Homo sapiens GN=TPM2 PE=4 SV=1
48	68497	tr|D6RBE9|D6RBE9_HUMAN	35.07	1	1		24698	Annexin OS=Homo sapiens GN=ANXA5 PE=2 SV=1
53	68546	tr|A8K0R3|A8K0R3_HUMAN	31.82	1	1		33922	Osteoglycin (Osteoinductive factor mimecan) isoform CRA_a OS=Homo sapiens GN=OGN PE=2 SV=1
53	68547	P20774|MIME_HUMAN	31.82	1	1		33922	Mimecan OS=Homo sapiens GN=OGN PE=1 SV=1
53	68548	tr|B4DI63|B4DI63_HUMAN	31.82	1	1		40553	cDNA FLJ59205 highly similar to Mimecan OS=Homo sapiens PE=2 SV=1
78	72463	P04083|ANXA1_HUMAN	46.91	1	1		38714	Annexin A1 OS=Homo sapiens GN=ANXA1 PE=1 SV=2
82	73022	tr|D3DT72|D3DT72_HUMAN	28.82	1	1		182417	Collagen type XI alpha 1 isoform CRA_c OS=Homo sapiens GN=COL11A1 PE=2 SV=1
78	98030	tr|Q5TZZ9|Q5TZZ9_HUMAN	46.91	1	1		38714	Annexin OS=Homo sapiens GN=ANXA1 PE=2 SV=1
78	98031	tr|B5BU38|B5BU38_HUMAN	46.91	1	1		38680	Annexin OS=Homo sapiens GN=ANXA1 PE=2 SV=1
7	400290	tr|A0A087WTD7|A0A087WTD7_HUMAN	41.03	2	2		161184	A-kinase anchor protein 13 OS=Homo sapiens OX=9606 GN=AKAP13 PE=1 SV=1
7	400299	tr|A8MYJ1|A8MYJ1_HUMAN	41.03	2	2		161840	A-kinase anchor protein 13 OS=Homo sapiens OX=9606 GN=AKAP13 PE=1 SV=3
7	400919	sp|Q12802|AKP13_HUMAN	41.03	2	2		307550	A-kinase anchor protein 13 OS=Homo sapiens OX=9606 GN=AKAP13 PE=1 SV=2
9	426676	sp|P04264|K2C1_HUMAN	40.9	1	1		66039	Keratin type II cytoskeletal 1 OS=Homo sapiens OX=9606 GN=KRT1 PE=1 SV=6
1	441544	sp|P02675|FIBB_HUMAN	60.05	3	3	Mutation	55928	Fibrinogen beta chain OS=Homo sapiens OX=9606 GN=FGB PE=1 SV=2
2	476675	B2R853|B2R853_HUMAN	80.09	5	1		60027	cDNA FLJ93744 highly similar to Homo sapiens keratin 6E (KRT6E) mRNA OS=Homo sapiens OX=9606 PE=2 SV=1
1	476676	B4DRU6|B4DRU6_HUMAN	79.98	5	1		58536	cDNA FLJ54657 highly similar to Keratin type II cytoskeletal 6A OS=Homo sapiens OX=9606 PE=2 SV=1
1	476677	A0A0S2Z428|A0A0S2Z428_HUMAN	79.98	5	1		60045	HCG2039812 isoform CRA_b (Fragment) OS=Homo sapiens OX=9606 GN=KRT6A PE=2 SV=1
1	476678	A8K2I0|A8K2I0_HUMAN	79.98	5	1		60031	cDNA FLJ78504 highly similar to Homo sapiens keratin 6A (KRT6A) mRNA OS=Homo sapiens OX=9606 PE=2 SV=1
4	476679	B4DRY0|B4DRY0_HUMAN	60.5	4	1		58678	cDNA FLJ54379 highly similar to Keratin type II cytoskeletal 6E OS=Homo sapiens OX=9606 PE=2 SV=1
25	476685	B2R5B6|B2R5B6_HUMAN	38.2	1	1		14137	Histone H2A OS=Homo sapiens OX=9606 PE=2 SV=1
25	476686	A0A024R017|A0A024R017_HUMAN	38.2	1	1		14105	Histone H2A OS=Homo sapiens OX=9606 GN=HIST1H2AC PE=3 SV=1
25	476687	A0A3B3IS11|A0A3B3IS11_HUMAN	38.2	1	1		15407	Histone H2A OS=Homo sapiens OX=9606 PE=3 SV=1
6	476702	A0A2X0SF55|A0A2X0SF55_HUMAN	29.91	1	1		307776	AKAP13 (Fragment) OS=Homo sapiens OX=9606 GN=AKAP13 PE=4 SV=1
6	476750	A0A087WTD7|A0A087WTD7_HUMAN	29.91	1	1		161184	A-kinase anchor protein 13 OS=Homo sapiens OX=9606 GN=AKAP13 PE=1 SV=1
6	476751	A8MYJ1|A8MYJ1_HUMAN	29.91	1	1		161840	A-kinase anchor protein 13 OS=Homo sapiens OX=9606 GN=AKAP13 PE=1 SV=3
27	476889	C9JTX5|C9JTX5_HUMAN	30.55	1	1		8534	Actin cytoplasmic 1 (Fragment) OS=Homo sapiens OX=9606 GN=ACTB PE=1 SV=1
27	476890	C9JUM1|C9JUM1_HUMAN	30.55	1	1		10634	Actin cytoplasmic 1 (Fragment) OS=Homo sapiens OX=9606 GN=ACTB PE=1 SV=2
27	476891	C9JZR7|C9JZR7_HUMAN	30.55	1	1		11295	Actin cytoplasmic 1 (Fragment) OS=Homo sapiens OX=9606 GN=ACTB PE=1 SV=8
27	476892	A1E282|A1E282_HUMAN	30.55	1	1		13539	Beta-actin (Fragment) OS=Homo sapiens OX=9606 PE=2 SV=1
27	476893	K7EM38|K7EM38_HUMAN	30.55	1	1		14522	Actin cytoplasmic 2 (Fragment) OS=Homo sapiens OX=9606 GN=ACTG1 PE=1 SV=1
27	476894	C9JFL5|C9JFL5_HUMAN	30.55	1	1		16158	Actin gamma-enteric smooth muscle (Fragment) OS=Homo sapiens OX=9606 GN=ACTG2 PE=1 SV=8
27	476895	F6UVQ4|F6UVQ4_HUMAN	30.55	1	1		16759	Actin aortic smooth muscle (Fragment) OS=Homo sapiens OX=9606 GN=ACTA2 PE=1 SV=1
27	476896	I3L3R2|I3L3R2_HUMAN	30.55	1	1		18032	Actin cytoplasmic 2 (Fragment) OS=Homo sapiens OX=9606 GN=ACTG1 PE=1 SV=1
27	476897	J3KT65|J3KT65_HUMAN	30.55	1	1		21804	Actin cytoplasmic 2 OS=Homo sapiens OX=9606 GN=ACTG1 PE=1 SV=1
27	476898	I3L1U9|I3L1U9_HUMAN	30.55	1	1		23845	Actin cytoplasmic 2 (Fragment) OS=Homo sapiens OX=9606 GN=ACTG1 PE=1 SV=1
27	476899	I3L3I0|I3L3I0_HUMAN	30.55	1	1		23845	Actin cytoplasmic 2 (Fragment) OS=Homo sapiens OX=9606 GN=ACTG1 PE=1 SV=1
27	476900	Q7Z7J6|Q7Z7J6_HUMAN	30.55	1	1		28151	Actin alpha 1 skeletal muscle protein OS=Homo sapiens OX=9606 GN=ACTA1 PE=2 SV=1
27	476901	A0A2R8Y793|A0A2R8Y793_HUMAN	30.55	1	1		34142	Actin cytoplasmic 1 (Fragment) OS=Homo sapiens OX=9606 GN=ACTB PE=1 SV=1
27	476902	B4DVQ0|B4DVQ0_HUMAN	30.55	1	1		37349	cDNA FLJ58286 highly similar to Actin cytoplasmic 2 OS=Homo sapiens OX=9606 PE=2 SV=1
27	476903	E7EVS6|E7EVS6_HUMAN	30.55	1	1		36940	Actin cytoplasmic 1 OS=Homo sapiens OX=9606 GN=ACTB PE=1 SV=9
27	476904	B7Z6P1|B7Z6P1_HUMAN	30.55	1	1		38579	cDNA FLJ53662 highly similar to Actin alpha skeletal muscle OS=Homo sapiens OX=9606 PE=2 SV=1
27	476905	B4DW52|B4DW52_HUMAN	30.55	1	1		38633	cDNA FLJ55253 highly similar to Actin cytoplasmic 1 OS=Homo sapiens OX=9606 PE=2 SV=1
27	476906	I3L4N8|I3L4N8_HUMAN	30.55	1	1		38976	Actin cytoplasmic 2 OS=Homo sapiens OX=9606 GN=ACTG1 PE=1 SV=9
27	476907	B4E3A4|B4E3A4_HUMAN	30.55	1	1		39800	cDNA FLJ57283 highly similar to Actin cytoplasmic 2 OS=Homo sapiens OX=9606 PE=2 SV=1
27	476908	Q8WVW5|Q8WVW5_HUMAN	30.55	1	1		40503	Uncharacterized protein (Fragment) OS=Homo sapiens OX=9606 PE=2 SV=1
27	476909	Q53GK6|Q53GK6_HUMAN	30.55	1	1		41723	Beta actin variant (Fragment) OS=Homo sapiens OX=9606 PE=2 SV=1
27	476910	B3KW67|B3KW67_HUMAN	30.55	1	1		41817	cDNA FLJ42347 fis clone UTERU2003399 highly similar to Actin gamma-enteric smooth muscle OS=Homo sapiens OX=9606 PE=2 SV=1
27	476911	D2JYH4|D2JYH4_HUMAN	30.55	1	1		42009	Actin alpha 2 smooth muscle aorta OS=Homo sapiens OX=9606 GN=ACTA2 PE=3 SV=1
1	477021	A0A087WTA8|A0A087WTA8_HUMAN	100.3	8	8		129151	Collagen alpha-2(I) chain OS=Homo sapiens OX=9606 GN=COL1A2 PE=1 SV=1
1	477022	A0A0S2Z3H5|A0A0S2Z3H5_HUMAN	100.3	8	8		129314	Collagen type I alpha 2 isoform 1 (Fragment) OS=Homo sapiens OX=9606 GN=COL1A2 PE=2 SV=1
1	477023	A0A384MDU2|A0A384MDU2_HUMAN	100.3	8	8		129288	Collagen type I alpha 2 isoform CRA_c OS=Homo sapiens OX=9606 GN=COL1A2 PE=2 SV=1
1	484240	B4E1D3|B4E1D3_HUMAN	60.05	3	3	Mutation	54253	Fibrinogen beta chain OS=Homo sapiens OX=9606 PE=2 SV=1
1	484241	V9HVY1|V9HVY1_HUMAN	60.05	3	3	Mutation	55928	Fibrinogen beta chain OS=Homo sapiens OX=9606 GN=HEL-S-78p PE=2 SV=1
10	481491	A0A0S2Z5N2|A0A0S2Z5N2_HUMAN	28.24	1	1		30263	Transmembrane protein 43 isoform 2 OS=Homo sapiens OX=9606 GN=TMEM43 PE=2 SV=1
22	481527	Q6N094|Q6N094_HUMAN	20.87	1	1		52613	Uncharacterized protein DKFZp686O01196 OS=Homo sapiens OX=9606 GN=DKFZp686O01196 PE=2 SV=1
11	481528	Q6ZSX8|Q6ZSX8_HUMAN	20.84	1	1		15475	cDNA FLJ45139 fis clone BRAWH3039623 OS=Homo sapiens OX=9606 PE=2 SV=1
33	482819	Q5EFE5|Q5EFE5_HUMAN	63.27	1	1	Carbamidomethylation	52363	Anti-RhD monoclonal T125 gamma1 heavy chain OS=Homo sapiens OX=9606 PE=2 SV=1
9	482902	H6VRF8|H6VRF8_HUMAN	40.9	1	1		66053	Cytokeratin-1 OS=Homo sapiens OX=9606 GN=KRT1 PE=3 SV=1
9	482903	H6VRG2|H6VRG2_HUMAN	40.9	1	1		66066	Cytokeratin-1 OS=Homo sapiens OX=9606 GN=KRT1 PE=3 SV=1
9	482904	H6VRF9|H6VRF9_HUMAN	40.9	1	1		66069	Cytokeratin-1 OS=Homo sapiens OX=9606 GN=KRT1 PE=3 SV=1
9	482905	H6VRG3|H6VRG3_HUMAN	40.9	1	1		66111	Cytokeratin-1 OS=Homo sapiens OX=9606 GN=KRT1 PE=3 SV=1
9	482906	H6VRG0|H6VRG0_HUMAN	40.9	1	1		65970	Cytokeratin-1 OS=Homo sapiens OX=9606 GN=KRT1 PE=3 SV=1
9	482907	H6VRG1|H6VRG1_HUMAN	40.9	1	1		66126	Cytokeratin-1 OS=Homo sapiens OX=9606 GN=KRT1 PE=1 SV=1

## Sheet: unique normal
Protein Group	Protein ID	Accession	-10lgP	#Peptides	#Unique	PTM	Avg. Mass	Description
99	159	tr|A7MAP7|A7MAP7_HUMAN	20.93	1	1	Oxidation (M)	38326	MHC class I antigen (Fragment) OS=Homo sapiens GN=HLA-B PE=3 SV=1
20	168	Q04695|K1C17_HUMAN	118.34	13	3	Carbamidomethylation	48106	Keratin type I cytoskeletal 17 OS=Homo sapiens GN=KRT17 PE=1 SV=2
99	188	P04222|1C03_HUMAN	20.93	1	1	Oxidation (M)	40861	HLA class I histocompatibility antigen Cw-3 alpha chain OS=Homo sapiens GN=HLA-C PE=1 SV=2
74	195	tr|Q6NSB4|Q6NSB4_HUMAN	36.71	1	1	Carbamidomethylation	31382	HP protein OS=Homo sapiens GN=HP PE=2 SV=1
50	212	tr|Q6MZU6|Q6MZU6_HUMAN	91.41	4	1	Carbamidomethylation	51099	Putative uncharacterized protein DKFZp686C15213 OS=Homo sapiens GN=DKFZp686C15213 PE=1 SV=1
51	315	tr|Q5ZEY3|Q5ZEY3_HUMAN	25.85	1	1		9201	Glyceraldehyde-3-phosphate dehydrogenase (Fragment) OS=Homo sapiens GN=GAPD PE=2 SV=1
67	334	tr|Q6B823|Q6B823_HUMAN	30.44	1	1		4916	Histone H4 (Fragment) OS=Homo sapiens PE=2 SV=1
99	405	tr|F6IQY1|F6IQY1_HUMAN	20.93	1	1	Oxidation (M)	38165	MHC class I antigen (Fragment) OS=Homo sapiens GN=HLA-A PE=2 SV=1
99	437	tr|Q7YQ33|Q7YQ33_HUMAN	20.93	1	1	Oxidation (M)	40846	MHC class I antigen OS=Homo sapiens GN=HLA-A PE=3 SV=1
13	528	P48668|K2C6C_HUMAN	82.22	8	1		60025	Keratin type II cytoskeletal 6C OS=Homo sapiens GN=KRT6C PE=1 SV=3
30	593	tr|Q3LR79|Q3LR79_HUMAN	74.02	5	5	Oxidation (M)	11482	Hemoglobin beta (Fragment) OS=Homo sapiens GN=HBB PE=2 SV=1
30	606	tr|Q14473|Q14473_HUMAN	74.02	5	5	Oxidation (M)	18931	Beta-globin gene from a thalassemia patient OS=Homo sapiens PE=2 SV=1
58	697	tr|Q96T46|Q96T46_HUMAN	27.79	1	1		8391	Hemoglobin alpha 2 (Fragment) OS=Homo sapiens GN=HBA2 PE=2 SV=1
20	821	tr|A0N071|A0N071_HUMAN	136.26	6	1	Acetylation (N-term)	16055	Delta globin OS=Homo sapiens GN=HBD PE=2 SV=1
20	822	P02042|HBD_HUMAN	136.26	6	1	Acetylation (N-term)	16055	Hemoglobin subunit delta OS=Homo sapiens GN=HBD PE=1 SV=2
55	913	A8MT79|ZAGL1_HUMAN	21.07	1	1	Carbamidomethylation	22980	Putative zinc-alpha-2-glycoprotein-like 1 OS=Homo sapiens PE=5 SV=2
55	914	P25311|ZA2G_HUMAN	21.07	1	1	Carbamidomethylation	34259	Zinc-alpha-2-glycoprotein OS=Homo sapiens GN=AZGP1 PE=1 SV=2
68	947	tr|Q6P5S3|Q6P5S3_HUMAN	67.92	2	2	Carbamidomethylation	24928	Putative uncharacterized protein OS=Homo sapiens PE=2 SV=1
68	948	tr|Q6GMV7|Q6GMV7_HUMAN	67.92	2	2	Carbamidomethylation	24950	Putative uncharacterized protein OS=Homo sapiens PE=2 SV=1
64	965	tr|Q53G89|Q53G89_HUMAN	30.03	1	1		46894	Elongation factor 1-alpha (Fragment) OS=Homo sapiens PE=2 SV=1
76	982	tr|B4DUI0|B4DUI0_HUMAN	59.83	1	1		27413	cDNA FLJ61414 highly similar to Desmin OS=Homo sapiens PE=2 SV=1
80	1169	tr|B4E1H9|B4E1H9_HUMAN	39.56	1	1		35045	cDNA FLJ53125 highly similar to Phosphoglycerate kinase 1 (EC 2.7.2.3) OS=Homo sapiens PE=2 SV=1
80	1170	tr|B7Z7A9|B7Z7A9_HUMAN	39.56	1	1		41429	Phosphoglycerate kinase OS=Homo sapiens GN=PGK1 PE=2 SV=1
80	1171	P00558|PGK1_HUMAN	39.56	1	1		44615	Phosphoglycerate kinase 1 OS=Homo sapiens GN=PGK1 PE=1 SV=3
80	1172	tr|B4DHM5|B4DHM5_HUMAN	39.56	1	1		25677	Phosphoglycerate kinase OS=Homo sapiens PE=2 SV=1
80	1173	tr|E7ERH5|E7ERH5_HUMAN	39.56	1	1		30019	Phosphoglycerate kinase OS=Homo sapiens GN=PGK1 PE=2 SV=1
80	1174	tr|B4DHB3|B4DHB3_HUMAN	39.56	1	1		29992	Phosphoglycerate kinase OS=Homo sapiens PE=2 SV=1
63	1177	tr|C9JQD4|C9JQD4_HUMAN	32.91	1	1		15800	Peptidyl-prolyl cis-trans isomerase (Fragment) OS=Homo sapiens GN=PPIH PE=2 SV=1
63	1182	tr|Q6FH57|Q6FH57_HUMAN	32.91	1	1		19257	Peptidyl-prolyl cis-trans isomerase OS=Homo sapiens GN=PPIH PE=2 SV=1
63	1183	tr|Q6FH36|Q6FH36_HUMAN	32.91	1	1		19208	Peptidyl-prolyl cis-trans isomerase (Fragment) OS=Homo sapiens GN=PPIH PE=2 SV=1
42	1280	tr|D4YW74|D4YW74_HUMAN	40.13	2	1		788544	Polytrophin OS=Homo sapiens GN=TROPH PE=2 SV=1
42	1287	Q8WXH0|SYNE2_HUMAN	40.13	2	1		796457	Nesprin-2 OS=Homo sapiens GN=SYNE2 PE=1 SV=3
34	1296	tr|Q2XP30|Q2XP30_HUMAN	27.63	1	1		2397	Mutant beta-globin OS=Homo sapiens GN=HBB PE=4 SV=1
63	1325	Q9NZT1|CALL5_HUMAN	26.98	1	1		15893	Calmodulin-like protein 5 OS=Homo sapiens GN=CALML5 PE=1 SV=2
75	1353	tr|B4DV42|B4DV42_HUMAN	75.58	2	2		44876	Elongation factor 1-alpha OS=Homo sapiens PE=2 SV=1
12	1362	tr|F8W1S1|F8W1S1_HUMAN	41.05	1	1		59407	Keratin type II cytoskeletal 74 OS=Homo sapiens GN=KRT74 PE=2 SV=1
68	1430	tr|Q6GMW4|Q6GMW4_HUMAN	67.92	2	2	Carbamidomethylation	24855	IGL@ protein OS=Homo sapiens GN=IGL@ PE=2 SV=1
68	1435	tr|Q6DHW4|Q6DHW4_HUMAN	67.92	2	2	Carbamidomethylation	25108	Putative uncharacterized protein OS=Homo sapiens PE=2 SV=1
68	1436	tr|Q6GMW6|Q6GMW6_HUMAN	67.92	2	2	Carbamidomethylation	24804	Putative uncharacterized protein OS=Homo sapiens PE=2 SV=1
68	1438	tr|Q6PIK1|Q6PIK1_HUMAN	67.92	2	2	Carbamidomethylation	24858	IGL@ protein OS=Homo sapiens GN=IGL@ PE=2 SV=1
73	1444	tr|E7EX24|E7EX24_HUMAN	46.12	2	2		19333	14-3-3 protein zeta/delta OS=Homo sapiens GN=YWHAZ PE=2 SV=1
68	1447	tr|Q5CZ94|Q5CZ94_HUMAN	67.92	2	2	Carbamidomethylation	25002	Putative uncharacterized protein DKFZp781M0386 OS=Homo sapiens GN=DKFZp781M0386 PE=2 SV=1
73	1469	tr|B7Z2E6|B7Z2E6_HUMAN	46.12	2	2		13985	14-3-3 protein zeta/delta OS=Homo sapiens GN=YWHAZ PE=2 SV=1
73	1470	tr|H0YB80|H0YB80_HUMAN	46.12	2	2		14636	14-3-3 protein zeta/delta (Fragment) OS=Homo sapiens GN=YWHAZ PE=4 SV=1
68	1472	tr|A0M8Q9|A0M8Q9_HUMAN	67.92	2	2	Carbamidomethylation	11291	C1 segment protein (Fragment) OS=Homo sapiens GN=C1 segment PE=2 SV=1
68	1474	tr|Q6P2J1|Q6P2J1_HUMAN	67.92	2	2	Carbamidomethylation	24970	Putative uncharacterized protein OS=Homo sapiens PE=2 SV=1
73	1476	tr|B7Z465|B7Z465_HUMAN	46.12	2	2		19275	cDNA FLJ51775 highly similar to 14-3-3 protein zeta/delta OS=Homo sapiens PE=2 SV=1
73	1521	tr|Q2F831|Q2F831_HUMAN	46.12	2	2		11810	Tyrosine 3-monooxygenasea/tryptophan 5-monooxygenase activation protein zeta (Fragment) OS=Homo sapiens PE=2 SV=1
79	1529	tr|Q96MH4|Q96MH4_HUMAN	40.64	1	1		43649	cDNA FLJ32377 fis clone SKMUS1000014 highly similar to Polyubiquitin 9 OS=Homo sapiens PE=2 SV=1
79	1531	tr|Q66K58|Q66K58_HUMAN	40.64	1	1		78699	Putative uncharacterized protein (Fragment) OS=Homo sapiens PE=2 SV=1
30	1995	tr|Q5TCU6|Q5TCU6_HUMAN	57.09	2	2	Carbamidomethylation	258079	Talin-1 OS=Homo sapiens GN=TLN1 PE=4 SV=1
39	2045	Q7Z406|MYH14_HUMAN	49.71	1	1		227868	Myosin-14 OS=Homo sapiens GN=MYH14 PE=1 SV=2
60	2086	Q9ULT8|HECD1_HUMAN	20.76	1	1		289383	E3 ubiquitin-protein ligase HECTD1 OS=Homo sapiens GN=HECTD1 PE=1 SV=3
29	2203	tr|Q8NAB7|Q8NAB7_HUMAN	34.2	1	1		36637	cDNA FLJ35635 fis clone SPLEN2011805 highly similar to BONE/CARTILAGE PROTEOGLYCAN I OS=Homo sapiens PE=2 SV=1
32	3369	tr|H0YKS4|H0YKS4_HUMAN	47.73	2	2		19530	Annexin (Fragment) OS=Homo sapiens GN=ANXA2 PE=3 SV=1
43	3397	tr|Q9BUM6|Q9BUM6_HUMAN	94.46	4	1		47451	COL6A2 protein OS=Homo sapiens PE=2 SV=1
43	3423	tr|H0YNA0|H0YNA0_HUMAN	33.57	1	1		9058	Annexin (Fragment) OS=Homo sapiens GN=ANXA2 PE=3 SV=1
43	3424	tr|H0YN28|H0YN28_HUMAN	33.57	1	1		16092	Annexin (Fragment) OS=Homo sapiens GN=ANXA2 PE=3 SV=1
43	3425	tr|H0YL33|H0YL33_HUMAN	33.57	1	1		16433	Annexin (Fragment) OS=Homo sapiens GN=ANXA2 PE=3 SV=1
43	3426	tr|B3KRQ1|B3KRQ1_HUMAN	33.57	1	1		20933	cDNA FLJ34687 fis clone MESAN2000620 highly similar to Annexin A2 OS=Homo sapiens PE=2 SV=1
99	3430	tr|C8CJC0|C8CJC0_HUMAN	20.93	1	1	Oxidation (M)	21239	MHC class I antigen (Fragment) OS=Homo sapiens GN=HLA-B PE=3 SV=1
77	5082	tr|B2R5H0|B2R5H0_HUMAN	52.81	1	1		11724	cDNA FLJ92471 highly similar to Homo sapiens S100 calcium binding protein A11 (calgizzarin) (S100A11) mRNA OS=Homo sapiens PE=2 SV=1
77	5083	P31949|S10AB_HUMAN	52.81	1	1		11740	Protein S100-A11 OS=Homo sapiens GN=S100A11 PE=1 SV=2
63	5123	tr|A9LSU1|A9LSU1_HUMAN	74.89	2	2	Carbamidomethylation	25331	Type IV collagen alpha 1 (Fragment) OS=Homo sapiens PE=2 SV=1
63	5124	tr|Q59F15|Q59F15_HUMAN	74.89	2	2	Carbamidomethylation	82980	COL4A1 protein variant (Fragment) OS=Homo sapiens PE=2 SV=1
63	5125	P02462|CO4A1_HUMAN	74.89	2	2	Carbamidomethylation	160615	Collagen alpha-1(IV) chain OS=Homo sapiens GN=COL4A1 PE=1 SV=3
86	5142	P29400|CO4A5_HUMAN	22.71	1	1	Acetylation (N-term)	161044	Collagen alpha-5(IV) chain OS=Homo sapiens GN=COL4A5 PE=1 SV=2
82	5144	P46783|RS10_HUMAN	29.21	1	1		18898	40S ribosomal protein S10 OS=Homo sapiens GN=RPS10 PE=1 SV=1
82	5145	tr|F6U211|F6U211_HUMAN	29.21	1	1		19868	40S ribosomal protein S10 OS=Homo sapiens GN=RPS10 PE=2 SV=1
82	5146	tr|Q59GE4|Q59GE4_HUMAN	29.21	1	1		19860	Ribosomal protein S10 variant (Fragment) OS=Homo sapiens PE=2 SV=1
41	5150	tr|E9PHF0|E9PHF0_HUMAN	49.62	1	1		82524	Filamin-A OS=Homo sapiens GN=FLNA PE=2 SV=2
41	5152	tr|Q6NXF2|Q6NXF2_HUMAN	49.62	1	1		104164	FLNA protein (Fragment) OS=Homo sapiens GN=FLNA PE=2 SV=1
66	5153	tr|Q8TES4|Q8TES4_HUMAN	28.15	1	1		153599	FLJ00119 protein (Fragment) OS=Homo sapiens GN=FLJ00119 PE=2 SV=1
33	5154	tr|A6NDY9|A6NDY9_HUMAN	56.66	2	2		245864	Filamin A OS=Homo sapiens GN=FLNA PE=2 SV=4
74	5273	tr|Q7Z2W5|Q7Z2W5_HUMAN	21.98	1	1		89397	Putative uncharacterized protein DKFZp686G1646 OS=Homo sapiens GN=DKFZp686G1646 PE=2 SV=1
99	6898	tr|Q56H50|Q56H50_HUMAN	20.93	1	1	Oxidation (M)	21025	MHC class I antigen (Fragment) OS=Homo sapiens GN=HLA-B PE=2 SV=1
39	7724	tr|G8JLL9|G8JLL9_HUMAN	49.71	1	1		232039	Myosin-14 OS=Homo sapiens GN=MYH14 PE=4 SV=1
82	9807	Q14147|DHX34_HUMAN	21.42	1	1	Carbamidomethylation	128120	Probable ATP-dependent RNA helicase DHX34 OS=Homo sapiens GN=DHX34 PE=1 SV=2
60	9841	tr|G3V3A5|G3V3A5_HUMAN	20.76	1	1		216443	Tetratricopeptide repeat protein 6 OS=Homo sapiens GN=TTC6 PE=2 SV=1
99	11229	tr|G1EQ22|G1EQ22_HUMAN	20.93	1	1	Oxidation (M)	21007	MHC class I antigen (Fragment) OS=Homo sapiens GN=HLA-B PE=3 SV=1
58	14959	tr|Q01212|Q01212_HUMAN	37.47	1	1		115280	Profilaggrin (Fragment) OS=Homo sapiens PE=2 SV=1
73	15257	Q8WVV4|POF1B_HUMAN	29.59	1	1		68065	Protein POF1B OS=Homo sapiens GN=POF1B PE=1 SV=3
50	18315	O15050|TRNK1_HUMAN	24.7	1	1		336221	TPR and ankyrin repeat-containing protein 1 OS=Homo sapiens OX=9606 GN=TRANK1 PE=2 SV=4
78	35575	Q96RK0|CIC_HUMAN	24.61	1	1		163819	Protein capicua homolog OS=Homo sapiens OX=9606 GN=CIC PE=1 SV=2
124	37921	tr|E7EVL1|E7EVL1_HUMAN	20.2	1	1		125218	Adenylate cyclase type 8 OS=Homo sapiens OX=9606 GN=ADCY8 PE=1 SV=1
45	37922	sp|P40145|ADCY8_HUMAN	21.3	1	1		140122	Adenylate cyclase type 8 OS=Homo sapiens OX=9606 GN=ADCY8 PE=1 SV=1
262	37953	sp|O75376|NCOR1_HUMAN	28.9	2	1		270207	Nuclear receptor corepressor 1 OS=Homo sapiens OX=9606 GN=NCOR1 PE=1 SV=2
60	37960	sp|O14654|IRS4_HUMAN	27.73	1	1		133767	Insulin receptor substrate 4 OS=Homo sapiens OX=9606 GN=IRS4 PE=1 SV=1
194	38306	tr|E7ENN3|E7ENN3_HUMAN	23.01	2	2		964863	Nesprin-1 OS=Homo sapiens OX=9606 GN=SYNE1 PE=1 SV=2
47	38350	tr|E9PN67|E9PN67_HUMAN	21.09	1	1		231096	Ninein OS=Homo sapiens OX=9606 GN=NIN PE=1 SV=1
131	38534	tr|E7EVH7|E7EVH7_HUMAN	23.27	1	1		83695	Uncharacterized protein OS=Homo sapiens OX=9606 PE=4 SV=1
243	38588	sp|P98161|PKD1_HUMAN	26.06	2	1		462534	Polycystin-1 OS=Homo sapiens OX=9606 GN=PKD1 PE=1 SV=3
62	38657	sp|Q14671|PUM1_HUMAN	24.75	1	1		126473	Pumilio homolog 1 OS=Homo sapiens OX=9606 GN=PUM1 PE=1 SV=3
92	38660	tr|Q5T1Z4|Q5T1Z4_HUMAN	24.15	1	1		126756	Pumilio homolog 1 OS=Homo sapiens OX=9606 GN=PUM1 PE=1 SV=1
92	38668	tr|Q5T1Z8|Q5T1Z8_HUMAN	24.15	1	1		130108	Pumilio homolog 1 OS=Homo sapiens OX=9606 GN=PUM1 PE=1 SV=1
159	38718	sp|P05997|CO5A2_HUMAN	24.39	2	2	Oxidation (M)	144910	Collagen alpha-2(V) chain OS=Homo sapiens OX=9606 GN=COL5A2 PE=1 SV=3
78	38767	tr|I3L2J0|I3L2J0_HUMAN	24.61	1	1		257746	Protein capicua homolog OS=Homo sapiens OX=9606 GN=CIC PE=1 SV=1
13	38783	sp|Q9HCM3|K1549_HUMAN	42.64	2	1		210753	UPF0606 protein KIAA1549 OS=Homo sapiens OX=9606 GN=KIAA1549 PE=1 SV=4
25	38882	sp|Q8WXG9|AGRV1_HUMAN	31.31	2	2		693082	Adhesion G-protein coupled receptor V1 OS=Homo sapiens OX=9606 GN=ADGRV1 PE=1 SV=2
23	38884	tr|A0A0A0MRE3|A0A0A0MRE3_HUMAN	20.03	1	1		788380	Nesprin-2 OS=Homo sapiens OX=9606 GN=SYNE2 PE=1 SV=1
69	40040	Q7Z478|DHX29_HUMAN	21.74	1	1		155235	ATP-dependent RNA helicase DHX29 OS=Homo sapiens OX=9606 GN=DHX29 PE=1 SV=2
88	42220	P08572|CO4A2_HUMAN	20.72	1	1		167553	Collagen alpha-2(IV) chain OS=Homo sapiens OX=9606 GN=COL4A2 PE=1 SV=4
28	48464	sp|Q9BYX7|ACTBM_HUMAN	32.28	1	1		42016	Putative beta-actin-like protein 3 OS=Homo sapiens OX=9606 GN=POTEKP PE=5 SV=1
17	48522	sp|Q99490|AGAP2_HUMAN	32.78	2	2	Mutation	124673	Arf-GAP with GTPase ANK repeat and PH domain-containing protein 2 OS=Homo sapiens OX=9606 GN=AGAP2 PE=1 SV=2
18	48556	tr|A0A0A0MRF6|A0A0A0MRF6_HUMAN	31.74	2	2		453496	A-kinase anchor protein 9 OS=Homo sapiens OX=9606 GN=AKAP9 PE=1 SV=1
107	48849	sp|P02462|CO4A1_HUMAN	23.23	2	1		160611	Collagen alpha-1(IV) chain OS=Homo sapiens OX=9606 GN=COL4A1 PE=1 SV=4
9	48866	sp|Q3SY84|K2C71_HUMAN	40.9	1	1		57292	Keratin type II cytoskeletal 71 OS=Homo sapiens OX=9606 GN=KRT71 PE=1 SV=3
18	48981	tr|A0A0A0MRE9|A0A0A0MRE9_HUMAN	31.74	2	2		362578	A-kinase anchor protein 9 OS=Homo sapiens OX=9606 GN=AKAP9 PE=1 SV=1
104	49375	tr|A0A5F9UQ55|A0A5F9UQ55_HUMAN	22.42	1	1		61812	F-box/WD repeat-containing protein 4 OS=Homo sapiens OX=9606 GN=FBXW4 PE=1 SV=1
9	49446	sp|Q709C8|VP13C_HUMAN	22.62	1	1		422393	Vacuolar protein sorting-associated protein 13C OS=Homo sapiens OX=9606 GN=VPS13C PE=1 SV=1
16	49467	sp|O60281|ZN292_HUMAN	24.68	1	1		304815	Zinc finger protein 292 OS=Homo sapiens OX=9606 GN=ZNF292 PE=1 SV=3
86	49716	tr|Q49AM6|Q49AM6_HUMAN	22.71	1	1	Acetylation (N-term)	64324	COL4A5 protein OS=Homo sapiens OX=9606 GN=COL4A5 PE=1 SV=1
9	49728	tr|E9PEZ5|E9PEZ5_HUMAN	22.62	1	1		155668	BTB/POZ domain-containing protein 8 OS=Homo sapiens OX=9606 GN=BTBD8 PE=1 SV=2
9	49729	tr|A0A1B0GUL6|A0A1B0GUL6_HUMAN	22.62	1	1		199029	BTB/POZ domain-containing protein 8 OS=Homo sapiens OX=9606 GN=BTBD8 PE=1 SV=1
65	49955	sp|P12035|K2C3_HUMAN	22.67	1	1	Oxidation (M)	64417	Keratin type II cytoskeletal 3 OS=Homo sapiens OX=9606 GN=KRT3 PE=1 SV=3
61	50115	tr|E7ENL6|E7ENL6_HUMAN	24.17	1	1	Oxidation (M)	278115	Collagen alpha-3(VI) chain OS=Homo sapiens OX=9606 GN=COL6A3 PE=1 SV=2
26	50116	sp|P12111|CO6A3_HUMAN	20.78	1	1	Oxidation (M)	343668	Collagen alpha-3(VI) chain OS=Homo sapiens OX=9606 GN=COL6A3 PE=1 SV=5
56	51880	tr|A0A087WV20|A0A087WV20_HUMAN	28	2	2		425238	Alstrom syndrome protein 1 OS=Homo sapiens OX=9606 GN=ALMS1 PE=1 SV=1
109	50226	tr|M0QZR4|M0QZR4_HUMAN	21.44	1	1		108324	Rho guanine nucleotide exchange factor 1 OS=Homo sapiens OX=9606 GN=ARHGEF1 PE=1 SV=1
69	50330	tr|A2A341|A2A341_HUMAN	23.78	1	1		116534	Synaptonemal complex protein 2 (Fragment) OS=Homo sapiens OX=9606 GN=SYCP2 PE=1 SV=1
36	50530	tr|E9PGC5|E9PGC5_HUMAN	22.44	1	1		166028	Receptor-type tyrosine-protein phosphatase kappa OS=Homo sapiens OX=9606 GN=PTPRK PE=1 SV=1
10	50929	tr|A0A2R8Y461|A0A2R8Y461_HUMAN	20.85	1	1		129002	Putative Polycomb group protein ASXL3 (Fragment) OS=Homo sapiens OX=9606 GN=ASXL3 PE=4 SV=1
9	50961	tr|A0A140T8Y7|A0A140T8Y7_HUMAN	31.66	2	2	Carbamidomethylation	166684	Coiled-coil and C2 domain-containing protein 2A (Fragment) OS=Homo sapiens OX=9606 GN=CC2D2A PE=1 SV=2
265	51038	tr|A0A1W2PQW2|A0A1W2PQW2_HUMAN	26.89	2	2		178540	Voltage-dependent T-type calcium channel subunit alpha-1H OS=Homo sapiens OX=9606 GN=CACNA1H PE=1 SV=1
23	51266	tr|A0A0C4DGK3|A0A0C4DGK3_HUMAN	20.03	1	1		408730	Nesprin-2 OS=Homo sapiens OX=9606 GN=SYNE2 PE=1 SV=1
115	51304	tr|C9JFF0|C9JFF0_HUMAN	22.02	1	1		180150	Kinesin-like protein KIF26A OS=Homo sapiens OX=9606 GN=KIF26A PE=1 SV=1
131	51330	sp|Q9H7N4|SFR19_HUMAN	23.27	1	1		139269	Splicing factor arginine/serine-rich 19 OS=Homo sapiens OX=9606 GN=SCAF1 PE=1 SV=3
115	51487	sp|Q9ULI4|KI26A_HUMAN	22.02	1	1		194588	Kinesin-like protein KIF26A OS=Homo sapiens OX=9606 GN=KIF26A PE=1 SV=3
95	51533	tr|A0A494C087|A0A494C087_HUMAN	23.42	1	1		258640	Receptor-type tyrosine-protein phosphatase zeta OS=Homo sapiens OX=9606 GN=PTPRZ1 PE=1 SV=1
72	51587	tr|M0R0P8|M0R0P8_HUMAN	21.95	1	1		243397	Unconventional myosin-IXb OS=Homo sapiens OX=9606 GN=MYO9B PE=1 SV=1
38	51602	tr|A0A3F2YNW7|A0A3F2YNW7_HUMAN	20.24	1	1		245478	AT-rich interactive domain-containing protein 1B OS=Homo sapiens OX=9606 GN=ARID1B PE=1 SV=1
11	51615	sp|Q9Y618|NCOR2_HUMAN	25.58	1	1		273654	Nuclear receptor corepressor 2 OS=Homo sapiens OX=9606 GN=NCOR2 PE=1 SV=3
16	51764	sp|Q3T8J9|GON4L_HUMAN	24.68	1	1		248618	GON-4-like protein OS=Homo sapiens OX=9606 GN=GON4L PE=1 SV=1
10	51767	sp|Q9C0F0|ASXL3_HUMAN	20.85	1	1		241916	Putative Polycomb group protein ASXL3 OS=Homo sapiens OX=9606 GN=ASXL3 PE=2 SV=3
143	51770	tr|A0A087WYC6|A0A087WYC6_HUMAN	25.41	2	2		521061	Dynein heavy chain 11 axonemal OS=Homo sapiens OX=9606 GN=DNAH11 PE=1 SV=1
70	51905	sp|Q9NYQ8|FAT2_HUMAN	23.28	1	1	Mutation	479321	Protocadherin Fat 2 OS=Homo sapiens OX=9606 GN=FAT2 PE=1 SV=2
71	51918	tr|A0A0U1RRH1|A0A0U1RRH1_HUMAN	21.77	1	1		550832	Ryanodine receptor 3 OS=Homo sapiens OX=9606 GN=RYR3 PE=1 SV=1
71	51919	tr|A0A0X1KG73|A0A0X1KG73_HUMAN	21.77	1	1		551962	Ryanodine receptor 3 OS=Homo sapiens OX=9606 GN=RYR3 PE=1 SV=1
71	51921	sp|Q15413|RYR3_HUMAN	21.77	1	1		552049	Ryanodine receptor 3 OS=Homo sapiens OX=9606 GN=RYR3 PE=1 SV=3
71	51922	tr|A0A087X080|A0A087X080_HUMAN	21.77	1	1		552472	Ryanodine receptor 3 OS=Homo sapiens OX=9606 GN=RYR3 PE=1 SV=1
353	51924	sp|P21817|RYR1_HUMAN	26.07	2	2		565184	Ryanodine receptor 1 OS=Homo sapiens OX=9606 GN=RYR1 PE=1 SV=3
104	58558	Q5TGY3|AHDC1_HUMAN	20.74	1	1		168349	AT-hook DNA-binding motif-containing protein 1 OS=Homo sapiens OX=9606 GN=AHDC1 PE=1 SV=1
27	68494	tr|K7EPV9|K7EPV9_HUMAN	36.54	1	1		11291	Tropomyosin alpha-4 chain (Fragment) OS=Homo sapiens GN=TPM4 PE=4 SV=1
27	68495	tr|K7EMU5|K7EMU5_HUMAN	36.54	1	1		12017	Tropomyosin alpha-4 chain (Fragment) OS=Homo sapiens GN=TPM4 PE=4 SV=1
52	68521	Q9Y490|TLN1_HUMAN	23.03	1	1		269765	Talin-1 OS=Homo sapiens GN=TLN1 PE=1 SV=3
53	68545	tr|Q7Z532|Q7Z532_HUMAN	31.82	1	1		33922	Osteoglycin OG OS=Homo sapiens PE=2 SV=1
57	68558	tr|Q59EY7|Q59EY7_HUMAN	20.89	1	1		218689	T-cell lymphoma invasion and metastasis 2 variant (Fragment) OS=Homo sapiens PE=2 SV=1
78	68596	tr|A7XAK3|A7XAK3_HUMAN	24.61	1	1		170417	Capicua-like protein/double homeodomain 4 fusion protein OS=Homo sapiens GN=CIC/DUX4 fusion PE=2 SV=1
60	68602	tr|Q2LAE2|Q2LAE2_HUMAN	31.76	1	1		121644	Intersectin 1 short form (Fragment) OS=Homo sapiens GN=ITSN1 PE=2 SV=1
60	68604	tr|Q0PW95|Q0PW95_HUMAN	31.76	1	1		133613	Intersectin 1 short form variant 2 OS=Homo sapiens GN=ITSN1 PE=2 SV=1
60	68605	tr|E7ERJ0|E7ERJ0_HUMAN	31.76	1	1		133560	Intersectin-1 OS=Homo sapiens GN=ITSN1 PE=2 SV=1
60	68606	tr|A7XZY7|A7XZY7_HUMAN	31.76	1	1		134159	Intersectin 1 short form variant 4 OS=Homo sapiens GN=ITSN1 PE=2 SV=1
60	68608	tr|Q0PW94|Q0PW94_HUMAN	31.76	1	1		137102	Intersectin 1 short form variant 5 OS=Homo sapiens GN=ITSN1 PE=2 SV=1
60	68609	tr|B4DTM2|B4DTM2_HUMAN	31.76	1	1		137049	Intersectin-1 OS=Homo sapiens GN=ITSN1 PE=2 SV=1
80	68616	tr|A8K724|A8K724_HUMAN	23.36	1	1		63966	cDNA FLJ76899 highly similar to Homo sapiens p21(CDKN1A)-activated kinase 4 (PAK4) mRNA OS=Homo sapiens PE=2 SV=1
60	68617	tr|A8CTY3|A8CTY3_HUMAN	31.76	1	1		188381	Intersectin 1 long form variant 3 OS=Homo sapiens GN=ITSN1 PE=2 SV=1
60	68618	tr|Q14BD4|Q14BD4_HUMAN	31.76	1	1		194821	ITSN1 protein OS=Homo sapiens GN=ITSN1 PE=2 SV=1
60	68619	tr|A8CTX8|A8CTX8_HUMAN	31.76	1	1		194821	Intersectin 1 long form variant 2 OS=Homo sapiens GN=ITSN1 PE=2 SV=1
60	68620	tr|Q14BD3|Q14BD3_HUMAN	31.76	1	1		195448	Intersectin 1 (SH3 domain protein) OS=Homo sapiens GN=ITSN1 PE=2 SV=1
60	68621	Q15811|ITSN1_HUMAN	31.76	1	1		195420	Intersectin-1 OS=Homo sapiens GN=ITSN1 PE=1 SV=3
60	68622	tr|E9PD98|E9PD98_HUMAN	31.76	1	1		195379	Intersectin-1 OS=Homo sapiens GN=ITSN1 PE=2 SV=2
47	68662	tr|G8JLI6|G8JLI6_HUMAN	22.71	1	1		81723	Prolyl 3-hydroxylase 3 OS=Homo sapiens GN=LEPREL2 PE=4 SV=1
57	68665	tr|E9PMZ8|E9PMZ8_HUMAN	20.89	1	1		152983	T-lymphoma invasion and metastasis-inducing protein 2 (Fragment) OS=Homo sapiens GN=TIAM2 PE=2 SV=1
61	68691	tr|B4DJ27|B4DJ27_HUMAN	22.43	1	1		103985	cDNA FLJ56902 highly similar to Homo sapiens pleckstrin homology domain containing family H member 1 mRNA OS=Homo sapiens PE=2 SV=1
61	68692	Q9ULM0|PKHH1_HUMAN	22.43	1	1		151232	Pleckstrin homology domain-containing family H member 1 OS=Homo sapiens GN=PLEKHH1 PE=2 SV=2
60	68695	tr|Q7Z453|Q7Z453_HUMAN	31.76	1	1		14444	Intersectin 1 isoform 8 (Fragment) OS=Homo sapiens GN=ITSN1 PE=2 SV=1
62	68741	E5RJM6|ANR65_HUMAN	21.9	1	1		41497	Ankyrin repeat domain-containing protein 65 OS=Homo sapiens GN=ANKRD65 PE=2 SV=2
72	68757	tr|B7Z3E5|B7Z3E5_HUMAN	20.61	1	1		119056	cDNA FLJ53573 highly similar to Myosin Ic OS=Homo sapiens PE=2 SV=1
82	68762	tr|B4E3G3|B4E3G3_HUMAN	21.42	1	1	Carbamidomethylation	43377	cDNA FLJ60223 highly similar to Probable ATP-dependent RNA helicase DHX34 (EC 3.6.1.-) OS=Homo sapiens PE=2 SV=1
82	68763	tr|J3KR71|J3KR71_HUMAN	21.42	1	1	Carbamidomethylation	64567	Probable ATP-dependent RNA helicase DHX34 OS=Homo sapiens GN=DHX34 PE=4 SV=1
44	68764	tr|Q9NXR9|Q9NXR9_HUMAN	36.11	1	1		85984	cDNA FLJ20087 fis clone COL03793 OS=Homo sapiens PE=2 SV=1
44	68774	Q9BX84|TRPM6_HUMAN	36.11	1	1		231706	Transient receptor potential cation channel subfamily M member 6 OS=Homo sapiens GN=TRPM6 PE=1 SV=2
44	68775	tr|F8WAD9|F8WAD9_HUMAN	36.11	1	1		232213	Transient receptor potential cation channel subfamily M member 6 OS=Homo sapiens GN=TRPM6 PE=2 SV=1
84	68782	tr|A8KAD5|A8KAD5_HUMAN	21.18	1	1		90750	Oxysterol-binding protein OS=Homo sapiens PE=2 SV=1
85	68798	A6NKG5|RTL1_HUMAN	20.91	1	1	Carbamidomethylation	155047	Retrotransposon-like protein 1 OS=Homo sapiens GN=RTL1 PE=2 SV=3
90	68943	Q7L1I2|SV2B_HUMAN	20.3	1	1		77444	Synaptic vesicle glycoprotein 2B OS=Homo sapiens GN=SV2B PE=2 SV=1
89	69423	tr|Q4LE27|Q4LE27_HUMAN	23.78	1	1		191316	ABCA3 variant protein (Fragment) OS=Homo sapiens GN=ABCA3 variant protein PE=2 SV=1
86	69626	tr|A7MBN3|A7MBN3_HUMAN	22.71	1	1	Acetylation (N-term)	161790	Collagen type IV alpha 5 OS=Homo sapiens GN=COL4A5 PE=2 SV=1
99	69764	tr|D2DKU1|D2DKU1_HUMAN	20.93	1	1	Oxidation (M)	21010	MHC class I antigen (Fragment) OS=Homo sapiens GN=HLA-C PE=3 SV=1
99	69770	tr|K9LC33|K9LC33_HUMAN	20.93	1	1	Oxidation (M)	21035	MHC class I antigen (Fragment) OS=Homo sapiens GN=HLA-B PE=4 SV=1
99	69776	tr|G1ENE4|G1ENE4_HUMAN	20.93	1	1	Oxidation (M)	20978	MHC class I antigen (Fragment) OS=Homo sapiens GN=HLA-A PE=3 SV=1
99	69795	tr|D3U3W0|D3U3W0_HUMAN	20.93	1	1	Oxidation (M)	20872	MHC class I antigen (Fragment) OS=Homo sapiens GN=HLA-B PE=3 SV=1
99	69845	tr|J7RE54|J7RE54_HUMAN	20.93	1	1	Oxidation (M)	31616	HLA-A protein (Fragment) OS=Homo sapiens GN=HLA-A PE=3 SV=1
99	69848	tr|H8XBT9|H8XBT9_HUMAN	20.93	1	1	Oxidation (M)	31579	MHC class I antigen (Fragment) OS=Homo sapiens GN=HLA-C PE=3 SV=1
99	69861	tr|A1YWK4|A1YWK4_HUMAN	20.93	1	1	Oxidation (M)	34355	MHC class I antigen (Fragment) OS=Homo sapiens GN=HLA-B PE=3 SV=1
99	69865	tr|F6IQW6|F6IQW6_HUMAN	20.93	1	1	Oxidation (M)	38165	MHC class I antigen (Fragment) OS=Homo sapiens GN=HLA-A PE=2 SV=1
53	70029	tr|I0B0K7|I0B0K7_HUMAN	22.01	1	1		294482	Truncated profilaggrin OS=Homo sapiens GN=FLG PE=4 SV=1
44	70126	tr|F8W9E6|F8W9E6_HUMAN	27.28	1	1		223630	Transient receptor potential cation channel subfamily M member 6 OS=Homo sapiens GN=TRPM6 PE=2 SV=1
86	70370	tr|B0S7Q4|B0S7Q4_HUMAN	25.07	1	1		48145	Uncharacterized protein C6orf136 (Fragment) OS=Homo sapiens GN=C6orf136 PE=4 SV=1
99	71495	tr|F4NBV2|F4NBV2_HUMAN	20.93	1	1	Oxidation (M)	38146	MHC class I antigen (Fragment) OS=Homo sapiens GN=HLA-B PE=3 SV=1
61	72445	tr|H3BTN5|H3BTN5_HUMAN	74.95	2	2		53045	Pyruvate kinase (Fragment) OS=Homo sapiens GN=PKM PE=3 SV=1
58	72548	tr|I0B0K5|I0B0K5_HUMAN	37.47	1	1		259706	Truncated profilaggrin OS=Homo sapiens GN=FLG PE=4 SV=1
58	72549	tr|I0B0K6|I0B0K6_HUMAN	37.47	1	1		277267	Truncated profilaggrin OS=Homo sapiens GN=FLG PE=4 SV=1
75	72554	tr|Q86W03|Q86W03_HUMAN	21.42	1	1		44790	Squamous cell carcinoma antigen 2 OS=Homo sapiens GN=SERPINB4 PE=2 SV=1
48	72786	tr|D6RCE2|D6RCE2_HUMAN	21.45	1	1		69418	Tetratricopeptide repeat protein 37 (Fragment) OS=Homo sapiens GN=TTC37 PE=2 SV=1
10	72884	Q6KB66|K2C80_HUMAN	67.13	2	1		50525	Keratin type II cytoskeletal 80 OS=Homo sapiens GN=KRT80 PE=1 SV=2
76	72902	tr|Q15142|Q15142_HUMAN	21.19	1	1	Carbamidomethylation	392188	Polycystic kidney disease-associated protein OS=Homo sapiens GN=PKD1 PE=2 SV=1
60	72988	tr|H0YJP0|H0YJP0_HUMAN	20.76	1	1		162203	E3 ubiquitin-protein ligase HECTD1 (Fragment) OS=Homo sapiens GN=HECTD1 PE=4 SV=1
42	73088	Q9Y4B5|SOGA2_HUMAN	32.74	1	1		209525	Protein SOGA2 OS=Homo sapiens GN=SOGA2 PE=1 SV=5
78	74451	tr|E7EWN9|E7EWN9_HUMAN	20.96	1	1		28303	Down syndrome critical region protein 3 OS=Homo sapiens GN=DSCR3 PE=2 SV=1
11	75436	tr|C9JE98|C9JE98_HUMAN	25.58	1	1		268040	Nuclear receptor corepressor 2 OS=Homo sapiens GN=NCOR2 PE=2 SV=1
74	75479	Q02224|CENPE_HUMAN	21.98	1	1		316414	Centromere-associated protein E OS=Homo sapiens GN=CENPE PE=1 SV=2
62	80473	tr|Q0PNF2|Q0PNF2_HUMAN	22.63	1	1		275445	FEX1 OS=Homo sapiens PE=2 SV=1
45	80991	tr|A2A369|A2A369_HUMAN	22.91	1	1		178016	Dedicator of cytokinesis protein 8 OS=Homo sapiens GN=DOCK8 PE=4 SV=1
45	80998	Q8NF50|DOCK8_HUMAN	30.98	1	1		238527	Dedicator of cytokinesis protein 8 OS=Homo sapiens GN=DOCK8 PE=1 SV=3
60	81020	tr|B2R7P8|B2R7P8_HUMAN	22.78	1	1		64635	cDNA FLJ93545 highly similar to Homo sapiens 5-aminoimidazole-4-carboxamide ribonucleotide formyltransferase/IMP cyclohydrolase (ATIC) mRNA OS=Homo sapiens PE=2 SV=1
106	81178	Q3L8U1|CHD9_HUMAN	21.21	1	1		326022	Chromodomain-helicase-DNA-binding protein 9 OS=Homo sapiens GN=CHD9 PE=1 SV=2
89	81372	tr|H0Y3H2|H0Y3H2_HUMAN	23.78	1	1		184863	ATP-binding cassette sub-family A member 3 OS=Homo sapiens GN=ABCA3 PE=3 SV=1
48	81410	tr|Q5R207|Q5R207_HUMAN	20	1	1		102147	Carbamoylphosphate synthetase I OS=Homo sapiens GN=CPS1 PE=2 SV=1
72	81468	Q4LE39|ARI4B_HUMAN	22.04	1	1		147809	AT-rich interactive domain-containing protein 4B OS=Homo sapiens GN=ARID4B PE=1 SV=2
11	81582	tr|C9J0Q5|C9J0Q5_HUMAN	25.58	1	1		272821	Nuclear receptor corepressor 2 OS=Homo sapiens GN=NCOR2 PE=2 SV=2
53	81664	tr|I0B0K4|I0B0K4_HUMAN	22.01	1	1		122550	Truncated profilaggrin OS=Homo sapiens GN=FLG PE=4 SV=1
74	81687	tr|Q53H39|Q53H39_HUMAN	22.84	1	1		47472	Inhibin beta A subunit variant (Fragment) OS=Homo sapiens PE=2 SV=1
45	82311	tr|E9PG37|E9PG37_HUMAN	20	1	1		60790	Rho guanine nucleotide exchange factor 3 OS=Homo sapiens GN=ARHGEF3 PE=2 SV=1
28	94093	tr|Q6FH10|Q6FH10_HUMAN	50.69	2	2		39747	DCN protein OS=Homo sapiens GN=DCN PE=2 SV=1
28	94094	P07585|PGS2_HUMAN	50.69	2	2		39747	Decorin OS=Homo sapiens GN=DCN PE=1 SV=1
35	94113	Q9H7M6|ZSWM4_HUMAN	29.3	1	1		110138	Zinc finger SWIM domain-containing protein 4 OS=Homo sapiens GN=ZSWIM4 PE=2 SV=3
85	94143	A0PJK1|SC5AA_HUMAN	25.29	1	1		64343	Sodium/glucose cotransporter 5 OS=Homo sapiens GN=SLC5A10 PE=1 SV=2
56	94158	O15015|ZN646_HUMAN	21.68	1	1		200761	Zinc finger protein 646 OS=Homo sapiens GN=ZNF646 PE=1 SV=1
53	94200	tr|I0B0K8|I0B0K8_HUMAN	22.01	1	1		430418	Truncated profilaggrin OS=Homo sapiens GN=FLG PE=3 SV=1
87	94328	tr|G3V4T3|G3V4T3_HUMAN	23.83	1	1		129672	Nesprin-2 OS=Homo sapiens GN=SYNE2 PE=2 SV=1
90	94462	tr|Q53QS8|Q53QS8_HUMAN	23.16	1	1	Carbamidomethylation	61036	Putative uncharacterized protein ERBB4 (Fragment) OS=Homo sapiens GN=ERBB4 PE=2 SV=1
90	94463	tr|H3BLT0|H3BLT0_HUMAN	23.16	1	1	Carbamidomethylation	81018	ERBB4 intracellular domain (Fragment) OS=Homo sapiens GN=ERBB4 PE=4 SV=1
90	94464	Q15303|ERBB4_HUMAN	23.16	1	1	Carbamidomethylation	146808	Receptor tyrosine-protein kinase erbB-4 OS=Homo sapiens GN=ERBB4 PE=1 SV=1
92	94475	tr|B4DYU4|B4DYU4_HUMAN	22.53	1	1		110123	cDNA FLJ50922 highly similar to Phosphatidylinositol-4 5-bisphosphate 3-kinase catalytic subunit alpha isoform (EC 2.7.1.153) OS=Homo sapiens PE=2 SV=1
92	94476	tr|A8KA75|A8KA75_HUMAN	22.53	1	1		124284	cDNA FLJ75190 highly similar to H.sapiens phosphatidylinositol 3-kinase OS=Homo sapiens PE=2 SV=1
92	94477	tr|Q4LE51|Q4LE51_HUMAN	22.53	1	1		124385	PIK3CA variant protein (Fragment) OS=Homo sapiens GN=PIK3CA variant protein PE=2 SV=1
74	94489	O15066|KIF3B_HUMAN	21.98	1	1		85125	Kinesin-like protein KIF3B OS=Homo sapiens GN=KIF3B PE=1 SV=1
74	94490	tr|B7Z484|B7Z484_HUMAN	21.98	1	1		94276	Kinesin-like protein KIFC3 OS=Homo sapiens GN=KIFC3 PE=2 SV=1
94	94494	tr|B3KX11|B3KX11_HUMAN	21.66	1	1		57946	cDNA FLJ44436 fis clone UTERU2019706 highly similar to T-complex protein 1 subunit gamma OS=Homo sapiens PE=2 SV=1
94	94495	tr|Q59H77|Q59H77_HUMAN	21.66	1	1		63576	Chaperonin containing TCP1 subunit 3 (Gamma) variant (Fragment) OS=Homo sapiens PE=2 SV=1
95	94496	tr|B4E1J7|B4E1J7_HUMAN	21.56	1	1	Carbamidomethylation	70189	cDNA FLJ56935 highly similar to Centromere/kinetochore protein zw10 homolog OS=Homo sapiens PE=2 SV=1
95	94497	tr|B2R7C2|B2R7C2_HUMAN	21.56	1	1	Carbamidomethylation	88840	cDNA FLJ93375 highly similar to Homo sapiens ZW10 kinetochore associated homolog (Drosophila) (ZW10) mRNA OS=Homo sapiens PE=2 SV=1
95	94498	O43264|ZW10_HUMAN	21.56	1	1	Carbamidomethylation	88830	Centromere/kinetochore protein zw10 homolog OS=Homo sapiens GN=ZW10 PE=1 SV=3
76	94518	tr|Q59GT4|Q59GT4_HUMAN	21.19	1	1	Carbamidomethylation	127132	Polycystin 1 variant (Fragment) OS=Homo sapiens PE=2 SV=1
99	94523	tr|A7U8S2|A7U8S2_HUMAN	20.93	1	1	Oxidation (M)	10492	MHC class I antigen (Fragment) OS=Homo sapiens GN=HLA-B PE=3 SV=1
99	94524	tr|D6ML21|D6ML21_HUMAN	20.93	1	1	Oxidation (M)	21112	MHC class I antigen (Fragment) OS=Homo sapiens GN=HLA-A PE=3 SV=1
99	94525	tr|D6C6C4|D6C6C4_HUMAN	20.93	1	1	Oxidation (M)	21034	MHC class I antigen (Fragment) OS=Homo sapiens GN=HLA-A PE=3 SV=1
99	94526	tr|H6A2F7|H6A2F7_HUMAN	20.93	1	1	Oxidation (M)	21144	MHC class I antigen (Fragment) OS=Homo sapiens GN=HLA-C PE=3 SV=1
99	94527	tr|D2DKU2|D2DKU2_HUMAN	20.93	1	1	Oxidation (M)	21142	MHC class I antigen (Fragment) OS=Homo sapiens GN=HLA-C PE=3 SV=1
99	94528	tr|I1V1W9|I1V1W9_HUMAN	20.93	1	1	Oxidation (M)	21035	MHC class I antigen (Fragment) OS=Homo sapiens GN=HLA-B PE=3 SV=1
99	94529	tr|A3RKJ7|A3RKJ7_HUMAN	20.93	1	1	Oxidation (M)	20890	MHC class I antigen (Fragment) OS=Homo sapiens GN=HLA-B PE=3 SV=1
99	94530	tr|B5M202|B5M202_HUMAN	20.93	1	1	Oxidation (M)	21066	MHC class I antigen (Fragment) OS=Homo sapiens GN=HLA-B PE=3 SV=1
99	94531	tr|E9LY35|E9LY35_HUMAN	20.93	1	1	Oxidation (M)	21173	MHC class I antigen (Fragment) OS=Homo sapiens GN=HLA-B PE=3 SV=1
99	94532	tr|Q95IZ4|Q95IZ4_HUMAN	20.93	1	1	Oxidation (M)	21046	MHC class I antigen (Fragment) OS=Homo sapiens GN=HLA-A PE=2 SV=1
99	94533	tr|E9LY22|E9LY22_HUMAN	20.93	1	1	Oxidation (M)	21026	MHC class I antigen (Fragment) OS=Homo sapiens GN=HLA-B PE=3 SV=1
99	94534	tr|C0KLS2|C0KLS2_HUMAN	20.93	1	1	Oxidation (M)	21080	MHC class I antigen (Fragment) OS=Homo sapiens GN=HLA-B PE=3 SV=1
99	94535	tr|G9I2N9|G9I2N9_HUMAN	20.93	1	1	Oxidation (M)	21144	MHC Class I antigen (Fragment) OS=Homo sapiens GN=HLA-C PE=3 SV=1
99	94536	tr|I3UI81|I3UI81_HUMAN	20.93	1	1	Oxidation (M)	21016	MHC class I antigen (Fragment) OS=Homo sapiens GN=HLA-A PE=3 SV=1
99	94537	tr|D5FWD4|D5FWD4_HUMAN	20.93	1	1	Oxidation (M)	21048	MHC class I antigen (Fragment) OS=Homo sapiens GN=HLA-B PE=3 SV=1
99	94538	tr|C9E1F3|C9E1F3_HUMAN	20.93	1	1	Oxidation (M)	20977	MHC class I antigen (Fragment) OS=Homo sapiens GN=HLA-B PE=3 SV=1
99	94539	tr|E2GJS1|E2GJS1_HUMAN	20.93	1	1	Oxidation (M)	21035	MHC class I antigen (Fragment) OS=Homo sapiens GN=HLA-A PE=3 SV=1
99	94540	tr|E2DH73|E2DH73_HUMAN	20.93	1	1	Oxidation (M)	21138	MHC class I antigen (Fragment) OS=Homo sapiens GN=HLA-A PE=3 SV=1
99	94541	tr|F2VYI4|F2VYI4_HUMAN	20.93	1	1	Oxidation (M)	21006	MHC class I antigen (Fragment) OS=Homo sapiens GN=HLA-A PE=2 SV=1
99	94542	tr|J9PWX2|J9PWX2_HUMAN	20.93	1	1	Oxidation (M)	20975	MHC class I antigen (Fragment) OS=Homo sapiens GN=HLA-B PE=3 SV=1
99	94543	tr|F8R8J3|F8R8J3_HUMAN	20.93	1	1	Oxidation (M)	21014	MHC class I antigen (Fragment) OS=Homo sapiens GN=HLA-B PE=3 SV=1
99	94544	tr|Q3BJY6|Q3BJY6_HUMAN	20.93	1	1	Oxidation (M)	21185	MHC class I antigen (Fragment) OS=Homo sapiens GN=HLA-B PE=3 SV=1
99	94545	tr|G9HRN4|G9HRN4_HUMAN	20.93	1	1	Oxidation (M)	21020	MHC class I antigen (Fragment) OS=Homo sapiens GN=HLA-A PE=3 SV=1
99	94546	tr|J7K7F0|J7K7F0_HUMAN	20.93	1	1	Oxidation (M)	21197	MHC class I antigen (Fragment) OS=Homo sapiens GN=HLA-C PE=3 SV=1
99	94547	tr|E5G0Z4|E5G0Z4_HUMAN	20.93	1	1	Oxidation (M)	21199	MHC class I antigen (Fragment) OS=Homo sapiens GN=HLA-B PE=3 SV=1
99	94548	tr|Q9TQ32|Q9TQ32_HUMAN	20.93	1	1	Oxidation (M)	20991	MHC class I antigen (Fragment) OS=Homo sapiens GN=HLA-B PE=3 SV=1
99	94549	tr|F8SKT5|F8SKT5_HUMAN	20.93	1	1	Oxidation (M)	21242	MHC class I antigen (Fragment) OS=Homo sapiens GN=HLA-A PE=3 SV=1
99	94550	tr|A4USG9|A4USG9_HUMAN	20.93	1	1	Oxidation (M)	20978	MHC class I antigen (Fragment) OS=Homo sapiens GN=HLA-A PE=3 SV=1
99	94551	tr|D9U3H5|D9U3H5_HUMAN	20.93	1	1	Oxidation (M)	21035	MHC class I antigen (Fragment) OS=Homo sapiens GN=HLA-B PE=3 SV=1
99	94552	tr|D3U421|D3U421_HUMAN	20.93	1	1	Oxidation (M)	21184	MHC class I antigen (Fragment) OS=Homo sapiens GN=HLA-A PE=3 SV=1
99	94553	tr|F6KRL6|F6KRL6_HUMAN	20.93	1	1	Oxidation (M)	21054	MHC class I antigen (Fragment) OS=Homo sapiens GN=HLA-A PE=3 SV=1
99	94554	tr|F6KRT1|F6KRT1_HUMAN	20.93	1	1	Oxidation (M)	21036	MHC class I antigen (Fragment) OS=Homo sapiens GN=HLA-B PE=2 SV=1
99	94555	tr|K9LC13|K9LC13_HUMAN	20.93	1	1	Oxidation (M)	21050	MHC class I antigen (Fragment) OS=Homo sapiens GN=HLA-B PE=4 SV=1
99	94556	tr|F2VNI0|F2VNI0_HUMAN	20.93	1	1	Oxidation (M)	21006	MHC class I antigen (Fragment) OS=Homo sapiens GN=HLA-A PE=2 SV=1
99	94557	tr|Q9GJ54|Q9GJ54_HUMAN	20.93	1	1	Oxidation (M)	23645	MHC class I antigen (Fragment) OS=Homo sapiens GN=HLA-B PE=2 SV=1
99	94558	tr|E0WMN2|E0WMN2_HUMAN	20.93	1	1	Oxidation (M)	31643	MHC class I antigen (Fragment) OS=Homo sapiens GN=HLA-A PE=3 SV=1
99	94559	tr|Q4F7G8|Q4F7G8_HUMAN	20.93	1	1	Oxidation (M)	31660	MHC class I antigen (Fragment) OS=Homo sapiens GN=HLA-B PE=2 SV=1
99	94560	tr|B2DFV8|B2DFV8_HUMAN	20.93	1	1	Oxidation (M)	31774	MHC class I antigen (Fragment) OS=Homo sapiens GN=HLA-A PE=3 SV=1
99	94561	tr|B2DG00|B2DG00_HUMAN	20.93	1	1	Oxidation (M)	31707	MHC class I antigen (Fragment) OS=Homo sapiens GN=HLA-B PE=3 SV=1
99	94562	tr|Q6F3H9|Q6F3H9_HUMAN	20.93	1	1	Oxidation (M)	31649	MHC class I antigen (Fragment) OS=Homo sapiens GN=HLA-B PE=3 SV=1
99	94563	tr|J7RPN4|J7RPN4_HUMAN	20.93	1	1	Oxidation (M)	31798	MHC class I antigen (Fragment) OS=Homo sapiens GN=HLA-C PE=3 SV=1
99	94564	tr|F4YTF3|F4YTF3_HUMAN	20.93	1	1	Oxidation (M)	31677	MHC class I antigen (Fragment) OS=Homo sapiens GN=HLA-B PE=3 SV=1
99	94565	tr|Q6F3H8|Q6F3H8_HUMAN	20.93	1	1	Oxidation (M)	31616	MHC class I antigen (Fragment) OS=Homo sapiens GN=HLA-B PE=3 SV=1
99	94566	tr|E1Y7G1|E1Y7G1_HUMAN	20.93	1	1	Oxidation (M)	31687	MHC class I antigen (Fragment) OS=Homo sapiens GN=HLA-B PE=3 SV=1
99	94567	tr|B2G3P7|B2G3P7_HUMAN	20.93	1	1	Oxidation (M)	31829	MHC class I antigen (Fragment) OS=Homo sapiens GN=HLA-A PE=3 SV=1
99	94568	tr|D5H3U5|D5H3U5_HUMAN	20.93	1	1	Oxidation (M)	34208	MHC class I antigen (Fragment) OS=Homo sapiens GN=HLA-A PE=3 SV=1
99	94569	tr|Q29656|Q29656_HUMAN	20.93	1	1	Oxidation (M)	36558	HLA-B71 variant (Fragment) OS=Homo sapiens PE=2 SV=1
99	94570	tr|F4NC04|F4NC04_HUMAN	20.93	1	1	Oxidation (M)	38297	MHC class I antigen (Fragment) OS=Homo sapiens GN=HLA-B PE=3 SV=1
99	94571	tr|F4NBU9|F4NBU9_HUMAN	20.93	1	1	Oxidation (M)	38204	MHC class I antigen (Fragment) OS=Homo sapiens GN=HLA-B PE=3 SV=1
99	94572	tr|F4NC03|F4NC03_HUMAN	20.93	1	1	Oxidation (M)	38310	MHC class I antigen (Fragment) OS=Homo sapiens GN=HLA-B PE=3 SV=1
99	94573	tr|E0Z0E3|E0Z0E3_HUMAN	20.93	1	1	Oxidation (M)	38449	MHC class I antigen (Fragment) OS=Homo sapiens GN=HLA-C PE=3 SV=1
99	94574	tr|G0ZG53|G0ZG53_HUMAN	20.93	1	1	Oxidation (M)	40312	MHC class I antigen OS=Homo sapiens GN=HLA-B PE=3 SV=1
99	94575	tr|D9UB09|D9UB09_HUMAN	20.93	1	1	Oxidation (M)	40774	MHC class I antigen OS=Homo sapiens GN=HLA-A PE=3 SV=1
78	94578	tr|O60768|O60768_HUMAN	20.96	1	1		28387	Putative uncharacterized protein (Fragment) OS=Homo sapiens PE=2 SV=1
100	94597	tr|H0YIL9|H0YIL9_HUMAN	20.48	1	1		30090	Probable ATP-dependent RNA helicase DDX23 (Fragment) OS=Homo sapiens GN=DDX23 PE=4 SV=1
103	94605	tr|B0QYC4|B0QYC4_HUMAN	20.23	1	1		53095	Caspase recruitment domain family member 10 (Fragment) OS=Homo sapiens GN=CARD10 PE=4 SV=1
103	94606	tr|Q8NC81|Q8NC81_HUMAN	20.23	1	1		82541	Caspase recruitment domain family member 10 OS=Homo sapiens GN=CARD10 PE=2 SV=1
103	94607	tr|Q17RA1|Q17RA1_HUMAN	20.23	1	1		115674	Caspase recruitment domain family member 10 OS=Homo sapiens GN=CARD10 PE=2 SV=1
103	94608	Q9BWT7|CAR10_HUMAN	20.23	1	1		115931	Caspase recruitment domain-containing protein 10 OS=Homo sapiens GN=CARD10 PE=2 SV=2
56	95181	Q5D862|FILA2_HUMAN	52.27	1	1		248072	Filaggrin-2 OS=Homo sapiens GN=FLG2 PE=1 SV=1
13	95335	tr|H0Y7E2|H0Y7E2_HUMAN	35.09	1	1		122905	Myosin phosphatase Rho-interacting protein (Fragment) OS=Homo sapiens GN=MPRIP PE=4 SV=3
52	98376	tr|A2RRC9|A2RRC9_HUMAN	23.63	1	1		184517	IQ motif containing GTPase activating protein 3 OS=Homo sapiens GN=IQGAP3 PE=2 SV=1
66	98491	Q13835|PKP1_HUMAN	43.53	1	1	Carbamidomethylation	82861	Plakophilin-1 OS=Homo sapiens GN=PKP1 PE=1 SV=2
92	98681	tr|E9PR38|E9PR38_HUMAN	24.15	1	1		100500	Pumilio homolog 1 OS=Homo sapiens GN=PUM1 PE=2 SV=1
79	110633	tr|A8K674|A8K674_HUMAN	40.64	1	1		68448	cDNA FLJ75516 highly similar to Xenopus tropicalis ubiquitin C mRNA OS=Homo sapiens PE=2 SV=1
45	112269	tr|F2Z395|F2Z395_HUMAN	31.02	2	2		61771	Coiled-coil domain-containing protein 17 OS=Homo sapiens GN=CCDC17 PE=2 SV=1
53	112628	tr|I0B0K3|I0B0K3_HUMAN	22.01	1	1		91100	Truncated profilaggrin OS=Homo sapiens GN=FLG PE=4 SV=1
65	112814	Q9H799|CE042_HUMAN	27.61	1	1		361747	Uncharacterized protein C5orf42 OS=Homo sapiens GN=C5orf42 PE=1 SV=4
13	113749	tr|H0Y2S9|H0Y2S9_HUMAN	35.09	1	1		203491	Myosin phosphatase Rho-interacting protein (Fragment) OS=Homo sapiens GN=MPRIP PE=4 SV=3
32	146983	tr|H3BML6|H3BML6_HUMAN	20.11	1	1		67674	Transporter OS=Homo sapiens GN=SLC6A2 PE=3 SV=1
59	149590	tr|D9YZV8|D9YZV8_HUMAN	37.95	1	1		32817	Tropomyosin 1 (Alpha) isoform 7 OS=Homo sapiens GN=TPM1 PE=3 SV=1
59	149592	P06753|TPM3_HUMAN	37.95	1	1		32819	Tropomyosin alpha-3 chain OS=Homo sapiens GN=TPM3 PE=1 SV=1
45	156545	tr|D3DRH1|D3DRH1_HUMAN	30.98	1	1		230822	Dedicator of cytokinesis 8 isoform CRA_a OS=Homo sapiens GN=DOCK8 PE=2 SV=1
42	157436	tr|J3QL92|J3QL92_HUMAN	32.74	1	1		55250	Protein SOGA2 OS=Homo sapiens GN=SOGA2 PE=4 SV=1
46	166133	Q02413|DSG1_HUMAN	51.19	2	2		113748	Desmoglein-1 OS=Homo sapiens GN=DSG1 PE=1 SV=2
52	166140	Q96T51|RUFY1_HUMAN	22.04	1	1		79818	RUN and FYVE domain-containing protein 1 OS=Homo sapiens GN=RUFY1 PE=1 SV=2
52	166147	Q86VI3|IQGA3_HUMAN	23.63	1	1		184698	Ras GTPase-activating-like protein IQGAP3 OS=Homo sapiens GN=IQGAP3 PE=1 SV=2
73	166164	tr|F2Z2D5|F2Z2D5_HUMAN	29.59	1	1		34178	Protein POF1B OS=Homo sapiens GN=POF1B PE=2 SV=1
68	166165	tr|C9JA99|C9JA99_HUMAN	28.52	1	1	Carbamidomethylation	97431	Protocadherin alpha-13 OS=Homo sapiens GN=PCDHA13 PE=2 SV=1
68	166166	tr|Q59H35|Q59H35_HUMAN	28.52	1	1	Carbamidomethylation	99365	Protocadherin alpha 13 isoform 1 variant (Fragment) OS=Homo sapiens PE=2 SV=1
46	166179	tr|I6L8B7|I6L8B7_HUMAN	24.8	1	1		11257	Fatty acid-binding protein epidermal OS=Homo sapiens GN=FABP5 PE=4 SV=1
39	166181	tr|Q8WWI3|Q8WWI3_HUMAN	26.63	1	1		44226	AP-2 repressor OS=Homo sapiens PE=2 SV=1
70	166196	tr|B6ZGT6|B6ZGT6_HUMAN	23.31	1	1		50799	Retinoid X receptor-gamma OS=Homo sapiens GN=NR2B3 PE=2 SV=1
70	166197	tr|F1D8Q7|F1D8Q7_HUMAN	23.31	1	1		50871	Retinoic acid receptor RXR-gamma OS=Homo sapiens GN=NR2B3 PE=2 SV=1
56	166198	P63128|POK4_HUMAN	21.14	1	1		123620	HERV-K_6q14.1 provirus ancestral Gag-Pol polyprotein OS=Homo sapiens PE=3 SV=3
72	166211	tr|H7C5R6|H7C5R6_HUMAN	22.04	1	1		76228	AT-rich interactive domain-containing protein 4B (Fragment) OS=Homo sapiens GN=ARID4B PE=4 SV=1
33	166217	P22531|SPR2E_HUMAN	31.09	1	1	Carbamidomethylation	7855	Small proline-rich protein 2E OS=Homo sapiens GN=SPRR2E PE=2 SV=2
33	166218	P22532|SPR2D_HUMAN	31.09	1	1	Carbamidomethylation	7905	Small proline-rich protein 2D OS=Homo sapiens GN=SPRR2D PE=2 SV=2
33	166219	tr|Q15515|Q15515_HUMAN	31.09	1	1	Carbamidomethylation	8062	Small proline-rich protein OS=Homo sapiens GN=SPRR2C PE=2 SV=1
33	166220	Q96RM1|SPR2F_HUMAN	31.09	1	1	Carbamidomethylation	7805	Small proline-rich protein 2F OS=Homo sapiens GN=SPRR2F PE=2 SV=1
33	166221	P35325|SPR2B_HUMAN	31.09	1	1	Carbamidomethylation	7975	Small proline-rich protein 2B OS=Homo sapiens GN=SPRR2B PE=2 SV=1
33	166222	P35326|SPR2A_HUMAN	31.09	1	1	Carbamidomethylation	7965	Small proline-rich protein 2A OS=Homo sapiens GN=SPRR2A PE=2 SV=1
33	166223	Q9BYE4|SPR2G_HUMAN	31.09	1	1	Carbamidomethylation	8158	Small proline-rich protein 2G OS=Homo sapiens GN=SPRR2G PE=2 SV=1
74	166235	Q13188|STK3_HUMAN	20.93	1	1		56301	Serine/threonine-protein kinase 3 OS=Homo sapiens GN=STK3 PE=1 SV=2
74	166236	tr|B3KYA7|B3KYA7_HUMAN	20.93	1	1		59462	Serine/threonine-protein kinase 3 36kDa subunit OS=Homo sapiens GN=STK3 PE=2 SV=1
89	166345	Q86Y22|CONA1_HUMAN	27.99	1	1	Mutation	51944	Collagen alpha-1(XXIII) chain OS=Homo sapiens GN=COL23A1 PE=2 SV=1
92	167905	tr|H0YDK8|H0YDK8_HUMAN	24.15	1	1		95816	Pumilio homolog 1 (Fragment) OS=Homo sapiens GN=PUM1 PE=4 SV=1
13	168641	tr|H7C3G6|H7C3G6_HUMAN	35.09	1	1		32221	Myosin phosphatase Rho-interacting protein (Fragment) OS=Homo sapiens GN=MPRIP PE=4 SV=2
13	168675	tr|J3KSW8|J3KSW8_HUMAN	35.09	1	1		95929	Myosin phosphatase Rho-interacting protein (Fragment) OS=Homo sapiens GN=MPRIP PE=4 SV=1
57	170685	tr|Q05BW3|Q05BW3_HUMAN	29.2	1	1		65353	NES protein (Fragment) OS=Homo sapiens GN=NES PE=2 SV=1
57	170686	tr|A5PKT9|A5PKT9_HUMAN	29.2	1	1		65682	NES protein (Fragment) OS=Homo sapiens GN=NES PE=2 SV=1
67	171775	tr|Q17RL8|Q17RL8_HUMAN	20.05	1	1		86876	HCG2004980 isoform CRA_e OS=Homo sapiens GN=PDZD4 PE=2 SV=1
76	172466	tr|Q8NCJ3|Q8NCJ3_HUMAN	20.87	1	1		46904	cDNA FLJ90220 fis clone MAMMA1003126 moderately similar to Human Hpast (HPAST) mRNA OS=Homo sapiens PE=2 SV=1
40	182819	tr|B4DQ50|B4DQ50_HUMAN	69.66	3	3		58794	cDNA FLJ56823 highly similar to Protein-glutamine gamma-glutamyltransferase E (EC 2.3.2.13) OS=Homo sapiens PE=2 SV=1
40	182820	Q08188|TGM3_HUMAN	69.66	3	3		76632	Protein-glutamine gamma-glutamyltransferase E OS=Homo sapiens GN=TGM3 PE=1 SV=4
54	182826	tr|Q9HB00|Q9HB00_HUMAN	26.16	1	1	Carbamidomethylation	93835	Desmocollin 1 isoform CRA_b OS=Homo sapiens GN=DSC1 PE=2 SV=1
54	182827	Q08554|DSC1_HUMAN	26.16	1	1	Carbamidomethylation	99987	Desmocollin-1 OS=Homo sapiens GN=DSC1 PE=1 SV=2
49	182864	tr|H7C208|H7C208_HUMAN	22.03	1	1		16038	Mitogen-activated protein kinase kinase kinase kinase 2 (Fragment) OS=Homo sapiens GN=MAP4K2 PE=4 SV=1
70	182867	Q8WXX7|AUTS2_HUMAN	21.57	1	1		138982	Autism susceptibility gene 2 protein OS=Homo sapiens GN=AUTS2 PE=1 SV=1
23	183263	tr|J3KNV4|J3KNV4_HUMAN	21.71	1	1		123632	Integrin alpha-7 OS=Homo sapiens GN=ITGA7 PE=3 SV=1
60	183427	tr|J3QK85|J3QK85_HUMAN	20.76	1	1		94211	Transient receptor potential cation channel subfamily V member 1 OS=Homo sapiens GN=TRPV1 PE=4 SV=1
60	183428	tr|Q3LU47|Q3LU47_HUMAN	20.76	1	1		94147	Transient receptor potential vanilloid 1a OS=Homo sapiens GN=TRPV1 PE=2 SV=1
60	183433	tr|Q09HS5|Q09HS5_HUMAN	20.76	1	1		94846	Transient receptor potential cation channel subfamily V member 1 transcript variant A OS=Homo sapiens GN=TRPV1 PE=2 SV=1
88	200023	tr|D6RJC3|D6RJC3_HUMAN	26.21	1	1		92126	Type II inositol 3 4-bisphosphate 4-phosphatase (Fragment) OS=Homo sapiens GN=INPP4B PE=2 SV=1
84	204026	tr|F8W0P7|F8W0P7_HUMAN	37.71	1	1		27218	ATP synthase subunit beta mitochondrial (Fragment) OS=Homo sapiens GN=ATP5B PE=2 SV=1
64	204027	tr|B4DFR3|B4DFR3_HUMAN	70.05	2	2		25656	cDNA FLJ55771 highly similar to Lamin-A/C OS=Homo sapiens PE=2 SV=1
56	214242	Q07507|DERM_HUMAN	76.27	2	2	Carbamidomethylation	24005	Dermatopontin OS=Homo sapiens GN=DPT PE=2 SV=2
62	214243	P31151|S10A7_HUMAN	73.53	2	2		11471	Protein S100-A7 OS=Homo sapiens GN=S100A7 PE=1 SV=4
66	214259	tr|Q14BN3|Q14BN3_HUMAN	43.53	1	1	Carbamidomethylation	36813	PKP1 protein OS=Homo sapiens GN=PKP1 PE=2 SV=1
81	214266	tr|B1AP13|B1AP13_HUMAN	38.17	1	1	Carbamidomethylation	49338	CD55 molecule decay accelerating factor for complement (Cromer blood group) OS=Homo sapiens GN=CD55 PE=4 SV=1
88	252110	tr|E9PHC0|E9PHC0_HUMAN	26.21	1	1		77517	Type II inositol 3 4-bisphosphate 4-phosphatase (Fragment) OS=Homo sapiens GN=INPP4B PE=2 SV=1
57	292490	tr|C9JZR2|C9JZR2_HUMAN	21.56	1	1		104848	Catenin delta-1 OS=Homo sapiens GN=CTNND1 PE=4 SV=2
45	300834	tr|E7EU49|E7EU49_HUMAN	20	1	1		56691	Rho guanine nucleotide exchange factor 3 OS=Homo sapiens GN=ARHGEF3 PE=2 SV=1
66	360493	tr|H7BZ50|H7BZ50_HUMAN	22.42	1	1	Carbamidomethylation	12386	Mitotic-spindle organizing protein 2B (Fragment) OS=Homo sapiens GN=MZT2B PE=4 SV=1
101	398274	sp|P41226|UBA7_HUMAN	23.49	1	1		111694	Ubiquitin-like modifier-activating enzyme 7 OS=Homo sapiens OX=9606 GN=UBA7 PE=1 SV=2
45	398629	tr|C9J586|C9J586_HUMAN	20	1	1		47617	Rho guanine nucleotide exchange factor 3 OS=Homo sapiens OX=9606 GN=ARHGEF3 PE=1 SV=1
45	399035	sp|Q96LX7|CCD17_HUMAN	31.02	2	2		67721	Coiled-coil domain-containing protein 17 OS=Homo sapiens OX=9606 GN=CCDC17 PE=1 SV=2
23	399550	sp|Q4G0P3|HYDIN_HUMAN	20.17	1	1		575900	Hydrocephalus-inducing protein homolog OS=Homo sapiens OX=9606 GN=HYDIN PE=1 SV=3
26	399557	tr|F8VWT9|F8VWT9_HUMAN	29.46	3	2		469972	Probable E3 ubiquitin-protein ligase HECTD4 OS=Homo sapiens OX=9606 GN=HECTD4 PE=1 SV=2
38	400858	sp|Q8NFD5|ARI1B_HUMAN	20.24	1	1		236121	AT-rich interactive domain-containing protein 1B OS=Homo sapiens OX=9606 GN=ARID1B PE=1 SV=2
59	405748	tr|Q5TBF5|Q5TBF5_HUMAN	65.09	2	2		30456	Mimecan (Fragment) OS=Homo sapiens GN=OGN PE=4 SV=1
6	415791	sp|Q9NR48|ASH1L_HUMAN	21.21	1	1		332790	Histone-lysine N-methyltransferase ASH1L OS=Homo sapiens OX=9606 GN=ASH1L PE=1 SV=2
102	415800	sp|Q9P219|DAPLE_HUMAN	23.05	1	1		228228	Protein Daple OS=Homo sapiens OX=9606 GN=CCDC88C PE=1 SV=3
8	415823	sp|P49796|RGS3_HUMAN	26.89	1	1		132336	Regulator of G-protein signaling 3 OS=Homo sapiens OX=9606 GN=RGS3 PE=1 SV=2
13	415830	sp|Q6WCQ1|MPRIP_HUMAN	35.09	1	1		116533	Myosin phosphatase Rho-interacting protein OS=Homo sapiens OX=9606 GN=MPRIP PE=1 SV=3
113	415842	tr|A0A0D9SGF6|A0A0D9SGF6_HUMAN	23.08	2	1		287604	Spectrin alpha chain non-erythrocytic 1 OS=Homo sapiens OX=9606 GN=SPTAN1 PE=1 SV=1
13	415855	tr|J3QRL2|J3QRL2_HUMAN	35.09	1	1		20088	Myosin phosphatase Rho-interacting protein (Fragment) OS=Homo sapiens OX=9606 GN=MPRIP PE=1 SV=1
18	415863	tr|A0A2R8Y808|A0A2R8Y808_HUMAN	20.55	1	1		61191	Chromodomain-helicase-DNA-binding protein 8 (Fragment) OS=Homo sapiens OX=9606 GN=CHD8 PE=1 SV=1
18	415864	tr|A0A2R8Y840|A0A2R8Y840_HUMAN	20.55	1	1		225908	Chromodomain-helicase-DNA-binding protein 8 (Fragment) OS=Homo sapiens OX=9606 GN=CHD8 PE=1 SV=1
19	415865	sp|P78527|PRKDC_HUMAN	20.99	1	1		469093	DNA-dependent protein kinase catalytic subunit OS=Homo sapiens OX=9606 GN=PRKDC PE=1 SV=3
121	415886	sp|Q14204|DYHC1_HUMAN	28.13	2	1		532412	Cytoplasmic dynein 1 heavy chain 1 OS=Homo sapiens OX=9606 GN=DYNC1H1 PE=1 SV=5
13	415898	tr|A0A494BZV2|A0A494BZV2_HUMAN	35.09	1	1		274378	Myosin phosphatase Rho-interacting protein OS=Homo sapiens OX=9606 GN=MPRIP PE=1 SV=1
21	415918	sp|Q9BX66|SRBS1_HUMAN	31.33	2	1		142513	Sorbin and SH3 domain-containing protein 1 OS=Homo sapiens OX=9606 GN=SORBS1 PE=1 SV=3
29	415932	sp|P35499|SCN4A_HUMAN	26.48	1	1		208060	Sodium channel protein type 4 subunit alpha OS=Homo sapiens OX=9606 GN=SCN4A PE=1 SV=4
34	415944	tr|F8VSL4|F8VSL4_HUMAN	23.31	1	1	Oxidation (M)	4064	Transcription termination factor 2 mitochondrial (Fragment) OS=Homo sapiens OX=9606 GN=MTERF2 PE=4 SV=1
34	415945	tr|F8VXH5|F8VXH5_HUMAN	23.31	1	1	Oxidation (M)	10381	Transcription termination factor 2 mitochondrial (Fragment) OS=Homo sapiens OX=9606 GN=MTERF2 PE=4 SV=1
34	415946	tr|F8VSD8|F8VSD8_HUMAN	23.31	1	1	Oxidation (M)	20808	Transcription termination factor 2 mitochondrial (Fragment) OS=Homo sapiens OX=9606 GN=MTERF2 PE=1 SV=1
34	415947	sp|Q49AM1|MTEF2_HUMAN	23.31	1	1	Oxidation (M)	44414	Transcription termination factor 2 mitochondrial OS=Homo sapiens OX=9606 GN=MTERF2 PE=1 SV=2
24	415948	tr|F8VRY4|F8VRY4_HUMAN	22.85	1	1		45232	Protein O-mannosyl-transferase TMTC3 OS=Homo sapiens OX=9606 GN=TMTC3 PE=1 SV=1
24	415949	sp|Q6ZXV5|TMTC3_HUMAN	22.85	1	1		104009	Protein O-mannosyl-transferase TMTC3 OS=Homo sapiens OX=9606 GN=TMTC3 PE=1 SV=2
40	415957	sp|Q9P109|GCNT4_HUMAN	23.14	1	1		53052	Beta-1 3-galactosyl-O-glycosyl-glycoprotein beta-1 6-N-acetylglucosaminyltransferase 4 OS=Homo sapiens OX=9606 GN=GCNT4 PE=2 SV=1
41	415959	sp|Q6ZNB6|NFXL1_HUMAN	21.3	1	1		101339	NF-X1-type zinc finger protein NFXL1 OS=Homo sapiens OX=9606 GN=NFXL1 PE=1 SV=2
20	415968	sp|O14796|SH21B_HUMAN	22.76	1	1		15297	SH2 domain-containing protein 1B OS=Homo sapiens OX=9606 GN=SH2D1B PE=1 SV=2
43	415971	sp|Q8TDM6|DLG5_HUMAN	20.33	1	1		213866	Disks large homolog 5 OS=Homo sapiens OX=9606 GN=DLG5 PE=1 SV=4
45	415974	tr|C9J609|C9J609_HUMAN	20	1	1		21082	Rho guanine nucleotide exchange factor 3 (Fragment) OS=Homo sapiens OX=9606 GN=ARHGEF3 PE=1 SV=1
45	415975	tr|C9JNF2|C9JNF2_HUMAN	20	1	1		22741	Rho guanine nucleotide exchange factor 3 (Fragment) OS=Homo sapiens OX=9606 GN=ARHGEF3 PE=1 SV=1
45	415976	tr|H7C4P0|H7C4P0_HUMAN	20	1	1		26123	Rho guanine nucleotide exchange factor 3 (Fragment) OS=Homo sapiens OX=9606 GN=ARHGEF3 PE=1 SV=1
45	415977	sp|Q9NR81|ARHG3_HUMAN	20	1	1		59783	Rho guanine nucleotide exchange factor 3 OS=Homo sapiens OX=9606 GN=ARHGEF3 PE=1 SV=1
20	416008	tr|H0YMP3|H0YMP3_HUMAN	22.76	1	1		31181	G2/mitotic-specific cyclin-B2 OS=Homo sapiens OX=9606 GN=CCNB2 PE=1 SV=1
20	416038	tr|H1UBN3|H1UBN3_HUMAN	22.76	1	1		42651	Cyclin B2 OS=Homo sapiens OX=9606 GN=CCNB2 PE=1 SV=1
20	416046	sp|O95067|CCNB2_HUMAN	22.76	1	1		45282	G2/mitotic-specific cyclin-B2 OS=Homo sapiens OX=9606 GN=CCNB2 PE=1 SV=1
36	416054	tr|U3KQ43|U3KQ43_HUMAN	27.63	1	1		72951	Mediator of RNA polymerase II transcription subunit 16 OS=Homo sapiens OX=9606 GN=MED16 PE=1 SV=1
93	416104	sp|O95255|MRP6_HUMAN	24.19	1	1		164906	Multidrug resistance-associated protein 6 OS=Homo sapiens OX=9606 GN=ABCC6 PE=1 SV=2
23	416470	tr|Q8N7S5|Q8N7S5_HUMAN	20.17	1	1		44817	Phosphoinositide phospholipase C OS=Homo sapiens OX=9606 GN=PLCZ1 PE=1 SV=1
20	416683	sp|O60287|NPA1P_HUMAN	22.76	1	1		254386	Nucleolar pre-ribosomal-associated protein 1 OS=Homo sapiens OX=9606 GN=URB1 PE=1 SV=4
23	416962	tr|A0A3B3ISW9|A0A3B3ISW9_HUMAN	20.17	1	1		75311	Phosphoinositide phospholipase C OS=Homo sapiens OX=9606 GN=PLCZ1 PE=1 SV=1
9	417066	sp|Q96MR9|ZN560_HUMAN	22.62	1	1		91121	Zinc finger protein 560 OS=Homo sapiens OX=9606 GN=ZNF560 PE=2 SV=2
23	417099	sp|Q3SY69|AL1L2_HUMAN	20.17	1	1		101746	Mitochondrial 10-formyltetrahydrofolate dehydrogenase OS=Homo sapiens OX=9606 GN=ALDH1L2 PE=1 SV=2
9	417553	sp|Q86WG5|MTMRD_HUMAN	22.62	1	1		208463	Myotubularin-related protein 13 OS=Homo sapiens OX=9606 GN=SBF2 PE=1 SV=1
354	417583	sp|Q9UFH2|DYH17_HUMAN	25.89	2	2	Oxidation (M)	509318	Dynein heavy chain 17 axonemal OS=Homo sapiens OX=9606 GN=DNAH17 PE=1 SV=3
13	422962	tr|K7EM61|K7EM61_HUMAN	24.35	1	1		21929	CLK4-associating serine/arginine-rich protein (Fragment) OS=Homo sapiens OX=9606 GN=CLASRP PE=1 SV=2
13	422963	tr|F5H0Q6|F5H0Q6_HUMAN	24.35	1	1		74824	CLK4-associating serine/arginine-rich protein OS=Homo sapiens OX=9606 GN=CLASRP PE=1 SV=2
21	422964	sp|Q8N2M8|CLASR_HUMAN	20.48	1	1		77161	CLK4-associating serine/arginine rich protein OS=Homo sapiens OX=9606 GN=CLASRP PE=1 SV=4
13	422965	tr|A0A0A0MQS2|A0A0A0MQS2_HUMAN	24.35	1	1		77162	CLK4-associating serine/arginine-rich protein OS=Homo sapiens OX=9606 GN=CLASRP PE=1 SV=1
19	422972	sp|Q8N7X1|RMXL3_HUMAN	21.16	1	1		114938	RNA-binding motif protein X-linked-like-3 OS=Homo sapiens OX=9606 GN=RBMXL3 PE=2 SV=2
23	422976	sp|Q96PG2|M4A10_HUMAN	20.05	1	1		29747	Membrane-spanning 4-domains subfamily A member 10 OS=Homo sapiens OX=9606 GN=MS4A10 PE=2 SV=3
20	422977	tr|H0YMN4|H0YMN4_HUMAN	20.75	1	1		17919	SH2 domain-containing adapter protein F (Fragment) OS=Homo sapiens OX=9606 GN=SHF PE=4 SV=2
23	422988	tr|G3V2C6|G3V2C6_HUMAN	21.71	1	1		16576	Integrin alpha-7 (Fragment) OS=Homo sapiens OX=9606 GN=ITGA7 PE=1 SV=1
18	422997	sp|O95900|TRUB2_HUMAN	21.36	1	1		36694	Mitochondrial mRNA pseudouridine synthase TRUB2 OS=Homo sapiens OX=9606 GN=TRUB2 PE=1 SV=1
23	423051	tr|A0A1B0GTX4|A0A1B0GTX4_HUMAN	21.71	1	1		53513	Cyclin-dependent kinase-like 5 (Fragment) OS=Homo sapiens OX=9606 GN=CDKL5 PE=1 SV=1
23	423102	tr|E7ET86|E7ET86_HUMAN	21.71	1	1		67159	Cyclin-dependent kinase-like 3 OS=Homo sapiens OX=9606 GN=CDKL3 PE=1 SV=1
47	423488	sp|Q14526|HIC1_HUMAN	20	1	1		76508	Hypermethylated in cancer 1 protein OS=Homo sapiens OX=9606 GN=HIC1 PE=1 SV=5
42	423551	sp|Q96L93|KI16B_HUMAN	37.65	2	2		152011	Kinesin-like protein KIF16B OS=Homo sapiens OX=9606 GN=KIF16B PE=1 SV=2
64	423679	sp|Q8NFU7|TET1_HUMAN	21.88	1	1		235306	Methylcytosine dioxygenase TET1 OS=Homo sapiens OX=9606 GN=TET1 PE=1 SV=2
111	423825	sp|Q460N5|PAR14_HUMAN	21.03	1	1		202799	Protein mono-ADP-ribosyltransferase PARP14 OS=Homo sapiens OX=9606 GN=PARP14 PE=1 SV=3
9	426675	sp|Q7RTS7|K2C74_HUMAN	40.9	1	1		57865	Keratin type II cytoskeletal 74 OS=Homo sapiens OX=9606 GN=KRT74 PE=1 SV=2
255	426694	tr|A0A3B3IRK8|A0A3B3IRK8_HUMAN	26.86	2	2	Carbamidomethylation	112285	Interferon-induced helicase C domain-containing protein 1 OS=Homo sapiens OX=9606 GN=IFIH1 PE=1 SV=1
23	426707	tr|G3V4T3|G3V4T3_HUMAN	20.03	1	1		131351	Nesprin-2 (Fragment) OS=Homo sapiens OX=9606 GN=SYNE2 PE=1 SV=2
46	426716	sp|O00178|GTPB1_HUMAN	23.46	1	1		72454	GTP-binding protein 1 OS=Homo sapiens OX=9606 GN=GTPBP1 PE=1 SV=3
39	426730	sp|Q8WXS8|ATS14_HUMAN	22.2	1	1		133888	A disintegrin and metalloproteinase with thrombospondin motifs 14 OS=Homo sapiens OX=9606 GN=ADAMTS14 PE=2 SV=2
27	426734	sp|Q7Z7M0|MEGF8_HUMAN	23.06	1	1	Carbamidomethylation	303100	Multiple epidermal growth factor-like domains protein 8 OS=Homo sapiens OX=9606 GN=MEGF8 PE=1 SV=2
40	426741	sp|Q8NDW8|TT21A_HUMAN	29.24	2	1		150944	Tetratricopeptide repeat protein 21A OS=Homo sapiens OX=9606 GN=TTC21A PE=1 SV=3
49	426743	tr|A0A1B0GTU3|A0A1B0GTU3_HUMAN	39.72	2	1		146326	Kinesin-like protein KIF16B OS=Homo sapiens OX=9606 GN=KIF16B PE=1 SV=1
49	426824	tr|A0A0A0MRC9|A0A0A0MRC9_HUMAN	30.98	1	1		23429	Kinesin-like protein KIF16B OS=Homo sapiens OX=9606 GN=KIF16B PE=1 SV=1
86	426839	tr|H9KV91|H9KV91_HUMAN	26.1	1	1		11332	Proline-rich AKT1 substrate 1 (Fragment) OS=Homo sapiens OX=9606 GN=AKT1S1 PE=1 SV=1
88	426843	tr|E9PCZ3|E9PCZ3_HUMAN	26.21	1	1		78155	Inositol polyphosphate 4-phosphatase type II (Fragment) OS=Homo sapiens OX=9606 GN=INPP4B PE=1 SV=1
90	426848	tr|C9J3M8|C9J3M8_HUMAN	26.68	1	1		37001	Uncharacterized protein C3orf67 OS=Homo sapiens OX=9606 GN=C3orf67 PE=4 SV=1
72	426849	sp|O15327|INP4B_HUMAN	23.34	1	1		104738	Inositol polyphosphate 4-phosphatase type II OS=Homo sapiens OX=9606 GN=INPP4B PE=1 SV=4
88	426850	tr|E7EQN9|E7EQN9_HUMAN	26.21	1	1		105960	Inositol polyphosphate 4-phosphatase type II OS=Homo sapiens OX=9606 GN=INPP4B PE=1 SV=1
94	426864	tr|H0YHG0|H0YHG0_HUMAN	24.14	1	1		59194	Uncharacterized protein (Fragment) OS=Homo sapiens OX=9606 PE=1 SV=1
95	426867	tr|A0A494C1J5|A0A494C1J5_HUMAN	23.42	1	1		78264	Receptor-type tyrosine-protein phosphatase zeta (Fragment) OS=Homo sapiens OX=9606 GN=PTPRZ1 PE=1 SV=1
97	426875	tr|A0A0C4DGU5|A0A0C4DGU5_HUMAN	23.34	1	1		26433	Nucleolar protein 16 OS=Homo sapiens OX=9606 GN=NOP16 PE=1 SV=1
97	426876	tr|A0A087X2G6|A0A087X2G6_HUMAN	23.34	1	1		27435	Nucleolar protein 16 OS=Homo sapiens OX=9606 GN=NOP16 PE=1 SV=1
25	426878	tr|A0A1W2PPA4|A0A1W2PPA4_HUMAN	23.22	1	1		103295	Adhesion G-protein-coupled receptor V1 (Fragment) OS=Homo sapiens OX=9606 GN=ADGRV1 PE=1 SV=1
100	426888	tr|J3KSG2|J3KSG2_HUMAN	23.21	1	1		60146	Cytospin-B (Fragment) OS=Homo sapiens OX=9606 GN=SPECC1 PE=1 SV=1
66	426902	tr|H7C173|H7C173_HUMAN	22.42	1	1	Carbamidomethylation	12514	Mitotic-spindle organizing protein 2B (Fragment) OS=Homo sapiens OX=9606 GN=MZT2B PE=1 SV=1
66	426904	tr|A0A494C0V9|A0A494C0V9_HUMAN	22.42	1	1	Carbamidomethylation	15950	Mitotic-spindle organizing protein 2B OS=Homo sapiens OX=9606 GN=MZT2B PE=1 SV=1
83	426905	sp|Q6NZ67|MZT2B_HUMAN	21.51	1	1	Carbamidomethylation	16226	Mitotic-spindle organizing protein 2B OS=Homo sapiens OX=9606 GN=MZT2B PE=1 SV=1
83	426906	sp|Q6P582|MZT2A_HUMAN	21.51	1	1	Carbamidomethylation	16221	Mitotic-spindle organizing protein 2A OS=Homo sapiens OX=9606 GN=MZT2A PE=1 SV=2
107	426918	tr|A0A0C4DG51|A0A0C4DG51_HUMAN	22.36	1	1		71878	Calcium-independent phospholipase A2-gamma (Fragment) OS=Homo sapiens OX=9606 GN=PNPLA8 PE=1 SV=1
49	426925	tr|D6R9H2|D6R9H2_HUMAN	30.98	1	1		63961	Villin-like protein OS=Homo sapiens OX=9606 GN=VILL PE=1 SV=1
109	426927	sp|Q92888|ARHG1_HUMAN	21.44	1	1		102435	Rho guanine nucleotide exchange factor 1 OS=Homo sapiens OX=9606 GN=ARHGEF1 PE=1 SV=2
40	426938	sp|Q9NP60|IRPL2_HUMAN	20.73	1	1		78670	X-linked interleukin-1 receptor accessory protein-like 2 OS=Homo sapiens OX=9606 GN=IL1RAPL2 PE=2 SV=1
117	426945	sp|Q8IZ02|LRC34_HUMAN	20.55	1	1		51277	Leucine-rich repeat-containing protein 34 OS=Homo sapiens OX=9606 GN=LRRC34 PE=2 SV=3
119	426955	tr|A0A494C1F7|A0A494C1F7_HUMAN	20.99	1	1		99516	Chromodomain-helicase-DNA-binding protein 1-like (Fragment) OS=Homo sapiens OX=9606 GN=CHD1L PE=1 SV=1
122	426959	sp|Q92618|ZN516_HUMAN	20.33	1	1		124289	Zinc finger protein 516 OS=Homo sapiens OX=9606 GN=ZNF516 PE=1 SV=1
71	426985	tr|A0A2R8Y438|A0A2R8Y438_HUMAN	21.77	1	1		108391	Ankyrin repeat domain-containing protein 11 (Fragment) OS=Homo sapiens OX=9606 GN=ANKRD11 PE=1 SV=1
130	427008	tr|B6ZDN3|B6ZDN3_HUMAN	20.67	1	1		100337	Doublecortin domain-containing protein 1 OS=Homo sapiens OX=9606 GN=DCDC1 PE=4 SV=3
42	427039	sp|O15195|VILL_HUMAN	29.71	1	1		95907	Villin-like protein OS=Homo sapiens OX=9606 GN=VILL PE=2 SV=3
131	427097	tr|H0YJK3|H0YJK3_HUMAN	23.27	1	1		12600	Cytochrome c oxidase assembly factor 8 (Fragment) OS=Homo sapiens OX=9606 GN=COA8 PE=4 SV=1
131	427200	tr|A0A0U1RR29|A0A0U1RR29_HUMAN	23.27	1	1		15377	Cytochrome c oxidase assembly factor 8 (Fragment) OS=Homo sapiens OX=9606 GN=COA8 PE=4 SV=1
131	427342	tr|G3V4L6|G3V4L6_HUMAN	23.27	1	1		20180	Cytochrome c oxidase assembly factor 8 OS=Homo sapiens OX=9606 GN=COA8 PE=4 SV=2
131	427377	sp|Q96IL0|COA8_HUMAN	23.27	1	1		24153	Cytochrome c oxidase assembly factor 8 OS=Homo sapiens OX=9606 GN=COA8 PE=1 SV=3
356	427393	sp|A0AVK6|E2F8_HUMAN	23.75	2	2	Carbamidomethylation	94166	Transcription factor E2F8 OS=Homo sapiens OX=9606 GN=E2F8 PE=1 SV=1
131	427621	sp|C9JH25|PRRT4_HUMAN	23.27	1	1		92712	Proline-rich transmembrane protein 4 OS=Homo sapiens OX=9606 GN=PRRT4 PE=2 SV=1
28	427624	tr|D9IDM6|D9IDM6_HUMAN	21.6	1	1	Mutation	70945	LIR-1 OS=Homo sapiens OX=9606 GN=LILRB1 PE=1 SV=1
28	427625	tr|A0A0G2JQ44|A0A0G2JQ44_HUMAN	21.6	1	1	Mutation	70888	Leukocyte immunoglobulin-like receptor subfamily B member 1 OS=Homo sapiens OX=9606 GN=LILRB1 PE=1 SV=1
28	427626	tr|A0A0G2JNQ6|A0A0G2JNQ6_HUMAN	21.6	1	1	Mutation	71016	Leukocyte immunoglobulin-like receptor subfamily B member 1 OS=Homo sapiens OX=9606 GN=LILRB1 PE=1 SV=1
28	427627	tr|A0A0G2JP64|A0A0G2JP64_HUMAN	21.6	1	1	Mutation	72732	Leukocyte immunoglobulin-like receptor subfamily B member 1 OS=Homo sapiens OX=9606 GN=LILRB1 PE=1 SV=1
58	428826	sp|Q14C86|GAPD1_HUMAN	21.32	1	1		164979	GTPase-activating protein and VPS9 domain-containing protein 1 OS=Homo sapiens OX=9606 GN=GAPVD1 PE=1 SV=2
91	433198	sp|O95995|DRC4_HUMAN	20.74	1	1		56356	Dynein regulatory complex subunit 4 OS=Homo sapiens OX=9606 GN=GAS8 PE=1 SV=1
16	439250	sp|Q9P2K1|C2D2A_HUMAN	32.31	2	2	Carbamidomethylation	186184	Coiled-coil and C2 domain-containing protein 2A OS=Homo sapiens OX=9606 GN=CC2D2A PE=1 SV=3
12	439723	sp|Q9ULQ0|STRP2_HUMAN	25.11	1	1		95360	Striatin-interacting protein 2 OS=Homo sapiens OX=9606 GN=STRIP2 PE=1 SV=2
68	467222	sp|Q14028|CNGB1_HUMAN	23.73	1	1		139677	Cyclic nucleotide-gated cation channel beta-1 OS=Homo sapiens OX=9606 GN=CNGB1 PE=1 SV=2
16	472783	sp|Q9BPX7|CG025_HUMAN	24.68	1	1		46451	UPF0415 protein C7orf25 OS=Homo sapiens OX=9606 GN=C7orf25 PE=1 SV=1
49	473579	sp|Q9NTN9|SEM4G_HUMAN	24.67	1	1		91497	Semaphorin-4G OS=Homo sapiens OX=9606 GN=SEMA4G PE=1 SV=1
25	476683	H0YFX9|H0YFX9_HUMAN	38.2	1	1		9976	Histone H2A (Fragment) OS=Homo sapiens OX=9606 GN=H2AJ PE=1 SV=1
5	476690	C9J7T7|C9J7T7_HUMAN	31.01	2	2		220999	Nuclear receptor corepressor 2 OS=Homo sapiens OX=9606 GN=NCOR2 PE=1 SV=3
5	476691	C9J0Q5|C9J0Q5_HUMAN	31.01	2	2		272821	Nuclear receptor corepressor 2 OS=Homo sapiens OX=9606 GN=NCOR2 PE=1 SV=2
5	476692	A0A024RBS3|A0A024RBS3_HUMAN	31.01	2	2		273886	Nuclear receptor co-repressor 2 isoform CRA_c OS=Homo sapiens OX=9606 GN=NCOR2 PE=3 SV=1
60	476699	A0A087WV20|A0A087WV20_HUMAN	24.94	2	2		425238	Alstrom syndrome protein 1 OS=Homo sapiens OX=9606 GN=ALMS1 PE=1 SV=1
5	476725	C9JE98|C9JE98_HUMAN	23.51	1	1		268040	Nuclear receptor corepressor 2 OS=Homo sapiens OX=9606 GN=NCOR2 PE=1 SV=1
12	476753	A8K2A0|A8K2A0_HUMAN	25.11	1	1		95316	cDNA FLJ76770 OS=Homo sapiens OX=9606 PE=2 SV=1
12	476754	A4D1K4|A4D1K4_HUMAN	25.11	1	1		101803	Family with sequence similarity 40 member B OS=Homo sapiens OX=9606 GN=FAM40B PE=3 SV=1
9	476818	B2R7C8|B2R7C8_HUMAN	22.3	1	1		65328	cDNA FLJ93383 highly similar to Homo sapiens semenogelin II (SEMG2) mRNA OS=Homo sapiens OX=9606 PE=2 SV=1
16	476841	A0A2R8YED2|A0A2R8YED2_HUMAN	24.68	1	1		58095	DNA-binding protein RFX8 OS=Homo sapiens OX=9606 GN=RFX8 PE=4 SV=1
23	476878	Q96EE5|Q96EE5_HUMAN	32.88	1	1		17051	MPRIP protein (Fragment) OS=Homo sapiens OX=9606 GN=MPRIP PE=2 SV=1
23	476880	A8CGI1|A8CGI1_HUMAN	32.88	1	1		20551	Myosin phosphatase-Rho interacting protein (Fragment) OS=Homo sapiens OX=9606 GN=M-RIP PE=2 SV=1
23	476881	A8CGI0|A8CGI0_HUMAN	32.88	1	1		20968	Myosin phosphatase-Rho interacting protein (Fragment) OS=Homo sapiens OX=9606 GN=M-RIP PE=2 SV=1
23	476882	J3QRL2|J3QRL2_HUMAN	32.88	1	1		20088	Myosin phosphatase Rho-interacting protein (Fragment) OS=Homo sapiens OX=9606 GN=MPRIP PE=1 SV=1
23	476884	H7C3G6|H7C3G6_HUMAN	32.88	1	1		32221	Myosin phosphatase Rho-interacting protein (Fragment) OS=Homo sapiens OX=9606 GN=MPRIP PE=1 SV=2
23	476915	J3KSW8|J3KSW8_HUMAN	32.88	1	1		95929	Myosin phosphatase Rho-interacting protein (Fragment) OS=Homo sapiens OX=9606 GN=MPRIP PE=1 SV=1
23	476922	B9EGI2|B9EGI2_HUMAN	32.88	1	1		118047	Myosin phosphatase Rho interacting protein OS=Homo sapiens OX=9606 GN=MPRIP PE=2 SV=1
23	476924	H0Y7E2|H0Y7E2_HUMAN	32.88	1	1		122905	Myosin phosphatase Rho-interacting protein (Fragment) OS=Homo sapiens OX=9606 GN=MPRIP PE=1 SV=3
23	476926	U6FSN9|U6FSN9_HUMAN	32.88	1	1		150480	Tyrosine-protein kinase receptor OS=Homo sapiens OX=9606 GN=Mprip-Ntrk1 fusion gene PE=2 SV=1
23	476927	Q9Y6X7|Q9Y6X7_HUMAN	32.88	1	1		158411	KIAA0864 protein (Fragment) OS=Homo sapiens OX=9606 GN=KIAA0864 PE=2 SV=2
11	476931	B7Z4S2|B7Z4S2_HUMAN	26.19	1	1		24625	cDNA FLJ51252 highly similar to Collagen alpha-1(I) chain OS=Homo sapiens OX=9606 PE=2 SV=1
11	476932	D3DTX7|D3DTX7_HUMAN	26.19	1	1		84740	Collagen type I alpha 1 isoform CRA_a OS=Homo sapiens OX=9606 GN=COL1A1 PE=4 SV=1
30	476935	Q6UXT2|Q6UXT2_HUMAN	25.56	1	1		27104	RRLF9220 OS=Homo sapiens OX=9606 GN=UNQ9220 PE=2 SV=1
23	476936	H0Y2S9|H0Y2S9_HUMAN	32.88	1	1		203491	Myosin phosphatase Rho-interacting protein (Fragment) OS=Homo sapiens OX=9606 GN=MPRIP PE=1 SV=3
18	476938	B4DTX5|B4DTX5_HUMAN	24.66	1	1		83913	cDNA FLJ60072 highly similar to Homo sapiens sorbin and SH3 domain containing 1 (SORBS1) transcript variant 6 mRNA OS=Homo sapiens OX=9606 PE=2 SV=1
31	476940	F8VRY4|F8VRY4_HUMAN	24.37	1	1		45232	Protein O-mannosyl-transferase TMTC3 OS=Homo sapiens OX=9606 GN=TMTC3 PE=1 SV=1
31	476941	A8K321|A8K321_HUMAN	24.37	1	1		102028	Dolichyl-phosphate-mannose--protein mannosyltransferase OS=Homo sapiens OX=9606 PE=2 SV=1
31	476942	B4DZ55|B4DZ55_HUMAN	24.37	1	1		103822	Dolichyl-phosphate-mannose--protein mannosyltransferase OS=Homo sapiens OX=9606 PE=2 SV=1
33	476944	F8VSL4|F8VSL4_HUMAN	23.16	1	1	Oxidation (M)	4064	Transcription termination factor 2 mitochondrial (Fragment) OS=Homo sapiens OX=9606 GN=MTERF2 PE=4 SV=1
33	476945	F8VXH5|F8VXH5_HUMAN	23.16	1	1	Oxidation (M)	10381	Transcription termination factor 2 mitochondrial (Fragment) OS=Homo sapiens OX=9606 GN=MTERF2 PE=4 SV=1
33	476946	F8VSD8|F8VSD8_HUMAN	23.16	1	1	Oxidation (M)	20808	Transcription termination factor 2 mitochondrial (Fragment) OS=Homo sapiens OX=9606 GN=MTERF2 PE=1 SV=1
23	476949	A0A494BZV2|A0A494BZV2_HUMAN	32.88	1	1		274378	Myosin phosphatase Rho-interacting protein OS=Homo sapiens OX=9606 GN=MPRIP PE=1 SV=1
33	476950	A0A024RBL7|A0A024RBL7_HUMAN	23.16	1	1	Oxidation (M)	44414	mTERF domain containing 3 isoform CRA_a OS=Homo sapiens OX=9606 GN=MTERFD3 PE=3 SV=1
39	476965	A0A7I2V542|A0A7I2V542_HUMAN	20.97	1	1		187627	Histone-lysine N-methyltransferase ASH1L OS=Homo sapiens OX=9606 GN=ASH1L PE=1 SV=1
39	476966	A0A7I2V3D6|A0A7I2V3D6_HUMAN	20.97	1	1		189763	Histone-lysine N-methyltransferase ASH1L OS=Homo sapiens OX=9606 GN=ASH1L PE=1 SV=1
39	476967	A0A7I2V316|A0A7I2V316_HUMAN	20.97	1	1		191445	Histone-lysine N-methyltransferase ASH1L OS=Homo sapiens OX=9606 GN=ASH1L PE=1 SV=1
39	476969	A0A7I2YQU9|A0A7I2YQU9_HUMAN	20.97	1	1		325522	Histone-lysine N-methyltransferase ASH1L OS=Homo sapiens OX=9606 GN=ASH1L PE=1 SV=1
39	476970	A0A7I2V4K0|A0A7I2V4K0_HUMAN	20.97	1	1		332082	Histone-lysine N-methyltransferase ASH1L OS=Homo sapiens OX=9606 GN=ASH1L PE=1 SV=1
39	476971	A0A7I2V4H9|A0A7I2V4H9_HUMAN	20.97	1	1		332771	Histone-lysine N-methyltransferase ASH1L OS=Homo sapiens OX=9606 GN=ASH1L PE=1 SV=1
41	476975	sp|O75152|ZC11A_HUMAN	20.29	1	1		89131	Zinc finger CCCH domain-containing protein 11A OS=Homo sapiens OX=9606 GN=ZC3H11A PE=1 SV=3
42	476976	C9J066|C9J066_HUMAN	21.81	1	1		238191	Ninein OS=Homo sapiens OX=9606 GN=NIN PE=1 SV=1
4	477201	A0A024R776|A0A024R776_HUMAN	21.69	1	1		63062	CCR4-NOT transcription complex subunit 4 isoform CRA_a OS=Homo sapiens OX=9606 GN=CNOT4 PE=4 SV=1
15	477312	Q6LAN8|Q6LAN8_HUMAN	30.59	2	2	Mutation	97446	Collagen type I alpha 1 (Fragment) OS=Homo sapiens OX=9606 GN=COL1A1 PE=4 SV=1
15	477313	H9C5C5|H9C5C5_HUMAN	30.59	2	2	Mutation	100308	Collagen alpha-1(I) chain preproprotein OS=Homo sapiens OX=9606 GN=COL1A1 PE=2 SV=1
22	477671	B7Z6C8|B7Z6C8_HUMAN	20.01	1	1	Oxidation (M)	22996	Solute carrier family 25 member 46 OS=Homo sapiens OX=9606 GN=SLC25A46 PE=1 SV=1
22	477812	B4DY98|B4DY98_HUMAN	20.01	1	1	Oxidation (M)	36731	cDNA FLJ56268 OS=Homo sapiens OX=9606 PE=2 SV=1
58	485350	B4DGD8|B4DGD8_HUMAN	21.32	1	1		83993	GTPase-activating protein and VPS9 domain-containing protein 1 OS=Homo sapiens OX=9606 GN=GAPVD1 PE=1 SV=1
58	485351	C9IZ08|C9IZ08_HUMAN	21.32	1	1		109188	GTPase-activating protein and VPS9 domain-containing protein 1 (Fragment) OS=Homo sapiens OX=9606 GN=GAPVD1 PE=1 SV=1
58	485352	B4DK42|B4DK42_HUMAN	21.32	1	1		109610	cDNA FLJ61592 highly similar to Homo sapiens GTPase activating protein and VPS9 domains 1 (GAPVD1) mRNA (Fragment) OS=Homo sapiens OX=9606 PE=2 SV=1
58	485353	F8W9S7|F8W9S7_HUMAN	21.32	1	1		157463	GTPase-activating protein and VPS9 domain-containing protein 1 OS=Homo sapiens OX=9606 GN=GAPVD1 PE=1 SV=1
58	485354	A0A024R875|A0A024R875_HUMAN	21.32	1	1		159754	GTPase activating protein and VPS9 domains 1 isoform CRA_a OS=Homo sapiens OX=9606 GN=GAPVD1 PE=3 SV=1
58	485355	A0A024R862|A0A024R862_HUMAN	21.32	1	1		162897	GTPase activating protein and VPS9 domains 1 isoform CRA_b OS=Homo sapiens OX=9606 GN=GAPVD1 PE=3 SV=1
58	485356	A0A024R8A2|A0A024R8A2_HUMAN	21.32	1	1		166168	GTPase activating protein and VPS9 domains 1 isoform CRA_d OS=Homo sapiens OX=9606 GN=GAPVD1 PE=3 SV=1
21	483861	B4DEZ4|B4DEZ4_HUMAN	23.51	1	1		74446	cDNA FLJ58526 highly similar to Sodium/calcium exchanger 2 OS=Homo sapiens OX=9606 PE=2 SV=1
21	483943	sp|Q9UPR5|NAC2_HUMAN	23.51	1	1		100368	Sodium/calcium exchanger 2 OS=Homo sapiens OX=9606 GN=SLC8A2 PE=2 SV=2
42	483412	D6R9H2|D6R9H2_HUMAN	29.71	1	1		63961	Villin-like protein OS=Homo sapiens OX=9606 GN=VILL PE=1 SV=1
42	483432	A0A0S2Z5H2|A0A0S2Z5H2_HUMAN	29.71	1	1		76991	Villin-like isoform 1 (Fragment) OS=Homo sapiens OX=9606 GN=VILL PE=2 SV=1
26	482950	Q59F25|Q59F25_HUMAN	20.78	1	1	Oxidation (M)	182972	Alpha 3 type VI collagen isoform 5 variant (Fragment) OS=Homo sapiens OX=9606 PE=2 SV=1
48	482969	Q7KZJ3|Q7KZJ3_HUMAN	21.7	1	1		68003	Catenin (Cadherin-associated protein) delta 1 OS=Homo sapiens OX=9606 PE=2 SV=1
48	482970	A0A024R4Y7|A0A024R4Y7_HUMAN	21.7	1	1		68834	Catenin (Cadherin-associated protein) delta 1 isoform CRA_e OS=Homo sapiens OX=9606 GN=CTNND1 PE=3 SV=1
16	482976	A0A0J9YXT3|A0A0J9YXT3_HUMAN	22.98	1	1	Carbamidomethylation	36948	Coiled-coil and C2 domain-containing protein 2A (Fragment) OS=Homo sapiens OX=9606 GN=CC2D2A PE=1 SV=2
61	483050	A0A494C0U4|A0A494C0U4_HUMAN	26.86	1	1		227724	Protein-tyrosine-phosphatase OS=Homo sapiens OX=9606 GN=PTPRZ1 PE=1 SV=1
61	483051	A0A494C087|A0A494C087_HUMAN	26.86	1	1		258640	Protein-tyrosine-phosphatase OS=Homo sapiens OX=9606 GN=PTPRZ1 PE=1 SV=1
62	483056	H0YDK8|H0YDK8_HUMAN	24.75	1	1		95816	Pumilio homolog 1 (Fragment) OS=Homo sapiens OX=9606 GN=PUM1 PE=1 SV=1
62	483057	B4DU15|B4DU15_HUMAN	24.75	1	1		111675	cDNA FLJ54549 highly similar to Pumilio homolog 1 OS=Homo sapiens OX=9606 PE=2 SV=1
62	483058	Q5T1Z4|Q5T1Z4_HUMAN	24.75	1	1		126756	Pumilio homolog 1 OS=Homo sapiens OX=9606 GN=PUM1 PE=1 SV=1
64	483064	sp|A2RRH5|WDR27_HUMAN	23.69	1	1		90038	WD repeat-containing protein 27 OS=Homo sapiens OX=9606 GN=WDR27 PE=1 SV=3
66	483066	A0A0C4DG85|A0A0C4DG85_HUMAN	24.01	1	1		40006	All-trans-retinol dehydrogenase [NAD(+)] ADH7 OS=Homo sapiens OX=9606 GN=ADH7 PE=1 SV=1
42	483068	A0A0A0MRC9|A0A0A0MRC9_HUMAN	29.71	1	1		23429	Kinesin-like protein KIF16B OS=Homo sapiens OX=9606 GN=KIF16B PE=1 SV=1
23	483070	E5RJL2|E5RJL2_HUMAN	22.95	1	1		16770	Lysyl oxidase homolog 2 (Fragment) OS=Homo sapiens OX=9606 GN=LOXL2 PE=1 SV=1
70	483071	A8K1E9|A8K1E9_HUMAN	22.49	1	1	Carbamidomethylation	54250	Beta-MPP OS=Homo sapiens OX=9606 PE=2 SV=1
72	483074	B7Z4Z0|B7Z4Z0_HUMAN	23.34	1	1		74583	cDNA FLJ51916 highly similar to Type II inositol-3 4-bisphosphate4-phosphatase OS=Homo sapiens OX=9606 PE=2 SV=1
73	483075	sp|P13010|XRCC5_HUMAN	22.31	1	1		82705	X-ray repair cross-complementing protein 5 OS=Homo sapiens OX=9606 GN=XRCC5 PE=1 SV=3
72	483076	E9PHC0|E9PHC0_HUMAN	23.34	1	1		77517	Inositol polyphosphate 4-phosphatase type II (Fragment) OS=Homo sapiens OX=9606 GN=INPP4B PE=1 SV=1
72	483077	B7Z6T2|B7Z6T2_HUMAN	23.34	1	1		77589	cDNA FLJ50877 highly similar to Type II inositol-3 4-bisphosphate4-phosphatase (Fragment) OS=Homo sapiens OX=9606 PE=2 SV=1
72	483078	E9PCZ3|E9PCZ3_HUMAN	23.34	1	1		78155	Inositol polyphosphate 4-phosphatase type II (Fragment) OS=Homo sapiens OX=9606 GN=INPP4B PE=1 SV=1
72	483083	D6RJC3|D6RJC3_HUMAN	23.34	1	1		92126	Phosphatidylinositol-3 4-bisphosphate 4-phosphatase (Fragment) OS=Homo sapiens OX=9606 GN=INPP4B PE=1 SV=1
72	483086	E7EQN9|E7EQN9_HUMAN	23.34	1	1		105960	Phosphatidylinositol-3 4-bisphosphate 4-phosphatase OS=Homo sapiens OX=9606 GN=INPP4B PE=1 SV=1
80	483090	A0A0C4DGU5|A0A0C4DGU5_HUMAN	21.97	1	1		26433	Nucleolar protein 16 OS=Homo sapiens OX=9606 GN=NOP16 PE=1 SV=1
80	483091	Q9P0T8|Q9P0T8_HUMAN	21.97	1	1		26783	Nucleolar protein 16 OS=Homo sapiens OX=9606 PE=2 SV=1
80	483092	A0A087X2G6|A0A087X2G6_HUMAN	21.97	1	1		27435	Nucleolar protein 16 OS=Homo sapiens OX=9606 GN=NOP16 PE=1 SV=1
83	483095	H7BZ50|H7BZ50_HUMAN	21.51	1	1	Carbamidomethylation	12386	Mitotic-spindle organizing protein 2B (Fragment) OS=Homo sapiens OX=9606 GN=MZT2B PE=1 SV=1
83	483096	H7C173|H7C173_HUMAN	21.51	1	1	Carbamidomethylation	12514	Mitotic-spindle organizing protein 2B (Fragment) OS=Homo sapiens OX=9606 GN=MZT2B PE=1 SV=1
83	483097	A0A494C0V9|A0A494C0V9_HUMAN	21.51	1	1	Carbamidomethylation	15950	Mitotic-spindle organizing protein 2B OS=Homo sapiens OX=9606 GN=MZT2B PE=1 SV=1
54	483101	A0A7P0T939|A0A7P0T939_HUMAN	21.47	1	1		437803	A-kinase anchor protein 9 OS=Homo sapiens OX=9606 GN=AKAP9 PE=4 SV=1
54	483102	A0A7P0TAX3|A0A7P0TAX3_HUMAN	21.47	1	1		443741	A-kinase anchor protein 9 OS=Homo sapiens OX=9606 GN=AKAP9 PE=4 SV=1
54	483103	A0A7P0T928|A0A7P0T928_HUMAN	21.47	1	1		451014	A-kinase anchor protein 9 OS=Homo sapiens OX=9606 GN=AKAP9 PE=4 SV=1
90	483110	A0A3B3IRI7|A0A3B3IRI7_HUMAN	20.82	1	1		12287	Mannosyl-oligosaccharide glucosidase OS=Homo sapiens OX=9606 GN=MOGS PE=1 SV=1
92	483112	B4DW07|B4DW07_HUMAN	21.29	1	1		45731	cDNA FLJ50032 highly similar to Homo sapiens spectrin domain with coiled-coils 1 (SPECC1) transcript variant mRNA OS=Homo sapiens OX=9606 PE=2 SV=1
8	483120	A0A5F9ZHQ7|A0A5F9ZHQ7_HUMAN	21.07	1	1		105818	HAUS augmin-like complex subunit 3 OS=Homo sapiens OX=9606 GN=HAUS3 PE=1 SV=1
42	483166	A0A0S2Z5G7|A0A0S2Z5G7_HUMAN	29.71	1	1		43193	Villin-like isoform 2 OS=Homo sapiens OX=9606 GN=VILL PE=2 SV=1
16	478509	Q14BN2|Q14BN2_HUMAN	24.68	1	1		169091	Gon-4-like (C. elegans) OS=Homo sapiens OX=9606 GN=GON4L PE=2 SV=1
16	478522	A0A087WUE6|A0A087WUE6_HUMAN	24.68	1	1		170694	GON-4-like protein OS=Homo sapiens OX=9606 GN=GON4L PE=1 SV=1
16	478524	A4PBF6|A4PBF6_HUMAN	24.68	1	1		170721	YY1AP-related protein3 OS=Homo sapiens OX=9606 PE=2 SV=1
26	478679	E7ENL6|E7ENL6_HUMAN	20.78	1	1	Oxidation (M)	278115	Collagen alpha-3(VI) chain OS=Homo sapiens OX=9606 GN=COL6A3 PE=1 SV=2
12	481510	A0A0G2JPF6|A0A0G2JPF6_HUMAN	22.99	1	1		72941	Putative golgin subfamily A member 8F/8G OS=Homo sapiens OX=9606 GN=GOLGA8F PE=4 SV=1
12	481519	H3BMC3|H3BMC3_HUMAN	22.99	1	1		71572	Putative golgin subfamily A member 8F/8G OS=Homo sapiens OX=9606 GN=GOLGA8F PE=4 SV=2
21	481525	K7EM61|K7EM61_HUMAN	20.48	1	1		21929	CLK4-associating serine/arginine-rich protein (Fragment) OS=Homo sapiens OX=9606 GN=CLASRP PE=1 SV=2
21	481526	A0A0A0MQS2|A0A0A0MQS2_HUMAN	20.48	1	1		77162	CLK4-associating serine/arginine-rich protein OS=Homo sapiens OX=9606 GN=CLASRP PE=1 SV=1
62	481610	E9PR38|E9PR38_HUMAN	24.75	1	1		100500	Pumilio homolog 1 OS=Homo sapiens OX=9606 GN=PUM1 PE=1 SV=1
62	481611	Q5T1Z8|Q5T1Z8_HUMAN	24.75	1	1		130108	Pumilio homolog 1 OS=Homo sapiens OX=9606 GN=PUM1 PE=1 SV=1
51	481928	A0A024R914|A0A024R914_HUMAN	22.36	1	1		350930	Centrosomal protein 350kDa isoform CRA_a OS=Homo sapiens OX=9606 GN=CEP350 PE=4 SV=1
62	481968	B3KU37|B3KU37_HUMAN	24.75	1	1		98474	cDNA FLJ39157 fis clone OCBBF2002083 highly similar to Pumilio homolog 1 OS=Homo sapiens OX=9606 PE=2 SV=1
13	482454	sp|Q12946|FOXF1_HUMAN	21.47	1	1	Mutation	40122	Forkhead box protein F1 OS=Homo sapiens OX=9606 GN=FOXF1 PE=2 SV=2
59	482820	Q59EJ3|Q59EJ3_HUMAN	46.55	1	1		77496	Heat shock 70kDa protein 1A variant (Fragment) OS=Homo sapiens OX=9606 PE=1 SV=1
121	482826	C0JYZ1|C0JYZ1_HUMAN	24.18	2	2		521299	Dynein axonemal heavy chain 11 OS=Homo sapiens OX=9606 GN=DNAH11 PE=3 SV=1
117	482839	A0A1U9X953|A0A1U9X953_HUMAN	23.02	2	2	Oxidation (M); Carbamidomethylation	209419	NOTCH4 OS=Homo sapiens OX=9606 PE=3 SV=2
218	482843	A0A0G2JQA9|A0A0G2JQA9_HUMAN	28.99	2	2		428501	Mucin-4 (Fragment) OS=Homo sapiens OX=9606 GN=MUC4 PE=1 SV=1
38	482870	A0A7P0T8F0|A0A7P0T8F0_HUMAN	20.2	1	1		352717	Histone-lysine N-methyltransferase 2C (Fragment) OS=Homo sapiens OX=9606 GN=KMT2C PE=4 SV=1
38	482871	A0A7P0T9K8|A0A7P0T9K8_HUMAN	20.2	1	1		353233	Histone-lysine N-methyltransferase 2C (Fragment) OS=Homo sapiens OX=9606 GN=KMT2C PE=4 SV=1
38	482872	H7BY37|H7BY37_HUMAN	20.2	1	1		382292	Histone-lysine N-methyltransferase 2C (Fragment) OS=Homo sapiens OX=9606 GN=KMT2C PE=1 SV=2
169	482873	M0QX51|M0QX51_HUMAN	32.82	3	3		39447	A-kinase anchor protein 8 OS=Homo sapiens OX=9606 GN=AKAP8 PE=1 SV=2
40	482885	A0A0B4J1Y2|A0A0B4J1Y2_HUMAN	29.24	2	1		129686	Tetratricopeptide repeat protein 21A OS=Homo sapiens OX=9606 GN=TTC21A PE=1 SV=1
40	482889	A0A140VJY5|A0A140VJY5_HUMAN	29.24	2	1		151001	Testicular tissue protein Li 212 OS=Homo sapiens OX=9606 PE=2 SV=1
42	482895	A0A1B0GTU3|A0A1B0GTU3_HUMAN	37.65	2	2		146326	Kinesin-like protein KIF16B OS=Homo sapiens OX=9606 GN=KIF16B PE=1 SV=1
9	482901	F8W1S1|F8W1S1_HUMAN	40.9	1	1		59407	Keratin type II cytoskeletal 74 OS=Homo sapiens OX=9606 GN=KRT74 PE=1 SV=1
26	481633	A0A669KBC2|A0A669KBC2_HUMAN	20.24	1	1		112022	Cyclin-dependent kinase-like 5 OS=Homo sapiens OX=9606 GN=CDKL5 PE=1 SV=1
106	14679	tr|B7ZML1|B7ZML1_HUMAN	21.21	1	1		326006	CHD9 protein OS=Homo sapiens GN=CHD9 PE=2 SV=1

## Sheet: unique SIL
Protein Group	Protein ID	Accession	-10lgP	#Peptides	#Unique	PTM	Avg. Mass	Description
80	200	P04004|VTNC_HUMAN	55.54	1	1		54306	Vitronectin OS=Homo sapiens GN=VTN PE=1 SV=1
80	201	tr|D9ZGG2|D9ZGG2_HUMAN	55.54	1	1		54306	Vitronectin OS=Homo sapiens GN=VTN PE=2 SV=1
35	214	tr|Q6MZX7|Q6MZX7_HUMAN	129.16	7	1	Carbamidomethylation; Oxidation (M)	52421	Putative uncharacterized protein DKFZp686M24218 OS=Homo sapiens GN=DKFZp686M24218 PE=1 SV=1
48	230	tr|Q9UGA2|Q9UGA2_HUMAN	39.18	1	1		36816	Putative uncharacterized protein DKFZp566F223 (Fragment) OS=Homo sapiens GN=DKFZp566F223 PE=2 SV=1
56	245	tr|B2R6L0|B2R6L0_HUMAN	64.27	3	3		49897	cDNA FLJ93005 highly similar to Homo sapiens tubulin beta polypeptide (TUBB) mRNA OS=Homo sapiens PE=2 SV=1
56	248	tr|Q8N6N5|Q8N6N5_HUMAN	64.27	3	3		49808	Tubulin beta 2C OS=Homo sapiens GN=TUBB2C PE=2 SV=1
80	390	tr|B7Z553|B7Z553_HUMAN	55.54	1	1		23605	cDNA FLJ51266 highly similar to Vitronectin OS=Homo sapiens PE=2 SV=1
65	502	tr|K7EP01|K7EP01_HUMAN	47.52	2	2		12808	Histone H3.3 OS=Homo sapiens GN=H3F3B PE=4 SV=1
65	503	Q6NXT2|H3C_HUMAN	47.52	2	2		15214	Histone H3.3C OS=Homo sapiens GN=H3F3C PE=1 SV=3
56	508	tr|B4DJ43|B4DJ43_HUMAN	64.27	3	3		40567	cDNA FLJ53341 highly similar to Tubulin beta-4 chain OS=Homo sapiens PE=2 SV=1
1	522	tr|B4DRR0|B4DRR0_HUMAN	114.34	14	8	Oxidation (M)	57839	cDNA FLJ53910 highly similar to Keratin type II cytoskeletal 6A OS=Homo sapiens PE=2 SV=1
27	1005	tr|F5H8K9|F5H8K9_HUMAN	37.39	1	1		53966	Keratin type II cytoskeletal 4 OS=Homo sapiens GN=KRT4 PE=2 SV=1
27	1006	tr|B4DRR7|B4DRR7_HUMAN	37.39	1	1		54010	cDNA FLJ59399 highly similar to Keratin type II cytoskeletal 4 OS=Homo sapiens PE=2 SV=1
8	1009	tr|B4DKV4|B4DKV4_HUMAN	213.41	33	2	Acetylation (N-term); Carbamidomethylation; Oxidation (M)	55732	cDNA FLJ60647 highly similar to Keratin type II cytoskeletal 6B OS=Homo sapiens PE=2 SV=1
27	1010	P19013|K2C4_HUMAN	37.39	1	1		57285	Keratin type II cytoskeletal 4 OS=Homo sapiens GN=KRT4 PE=1 SV=4
60	1028	tr|Q53FV4|Q53FV4_HUMAN	40.23	1	1		38413	Lumican variant (Fragment) OS=Homo sapiens PE=2 SV=1
72	1093	P01009|A1AT_HUMAN	89.94	3	3		46737	Alpha-1-antitrypsin OS=Homo sapiens GN=SERPINA1 PE=1 SV=3
72	1094	tr|E9KL23|E9KL23_HUMAN	89.94	3	3		46737	Epididymis secretory sperm binding protein Li 44a OS=Homo sapiens PE=2 SV=1
31	1394	tr|E9PNZ4|E9PNZ4_HUMAN	21.34	1	1		231089	Microtubule-actin cross-linking factor 1 isoforms 1/2/3/5 (Fragment) OS=Homo sapiens GN=MACF1 PE=2 SV=1
31	1409	tr|B1ANR3|B1ANR3_HUMAN	21.34	1	1		505648	Microtubule-actin crosslinking factor 1 (Fragment) OS=Homo sapiens GN=MACF1 PE=2 SV=1
31	1410	tr|B1AP66|B1AP66_HUMAN	21.34	1	1		505648	Microtubule-actin crosslinking factor 1 (Fragment) OS=Homo sapiens GN=MACF1 PE=2 SV=1
31	1411	tr|B1ALC4|B1ALC4_HUMAN	21.34	1	1		505648	Microtubule-actin crosslinking factor 1 (Fragment) OS=Homo sapiens GN=MACF1 PE=2 SV=1
80	1416	Q9Y6V0|PCLO_HUMAN	21.78	1	1		553285	Protein piccolo OS=Homo sapiens GN=PCLO PE=1 SV=4
31	1418	tr|F5GZL7|F5GZL7_HUMAN	21.34	1	1		606141	Microtubule-actin cross-linking factor 1 isoforms 1/2/3/5 OS=Homo sapiens GN=MACF1 PE=2 SV=1
75	1557	P62258|1433E_HUMAN	30.54	1	1		29174	14-3-3 protein epsilon OS=Homo sapiens GN=YWHAE PE=1 SV=1
56	1654	tr|A8MUB1|A8MUB1_HUMAN	37.16	1	1		48329	Tubulin alpha-4A chain OS=Homo sapiens GN=TUBA4A PE=2 SV=1
56	1655	P68366|TBA4A_HUMAN	37.16	1	1		49924	Tubulin alpha-4A chain OS=Homo sapiens GN=TUBA4A PE=1 SV=1
56	1924	Q9H853|TBA4B_HUMAN	37.16	1	1		27551	Putative tubulin-like protein alpha-4B OS=Homo sapiens GN=TUBA4B PE=5 SV=2
77	1931	tr|A8MX94|A8MX94_HUMAN	56.06	1	1		19480	Glutathione S-transferase P OS=Homo sapiens GN=GSTP1 PE=2 SV=1
77	1934	P09211|GSTP1_HUMAN	56.06	1	1		23356	Glutathione S-transferase P OS=Homo sapiens GN=GSTP1 PE=1 SV=2
75	1967	tr|I3L0W5|I3L0W5_HUMAN	30.54	1	1		4516	14-3-3 protein epsilon OS=Homo sapiens GN=YWHAE PE=4 SV=1
75	1968	tr|F8WEB6|F8WEB6_HUMAN	30.54	1	1		4506	14-3-3 protein eta OS=Homo sapiens GN=YWHAH PE=2 SV=1
75	1971	tr|A2IDB1|A2IDB1_HUMAN	30.54	1	1		7571	14-3-3 protein eta OS=Homo sapiens GN=YWHAH PE=4 SV=1
75	1972	tr|B4DJB0|B4DJB0_HUMAN	30.54	1	1		15927	cDNA FLJ60092 highly similar to 14-3-3 protein epsilon (14-3-3E) OS=Homo sapiens PE=2 SV=1
73	2310	tr|H9KV90|H9KV90_HUMAN	20.61	1	1		225898	SH3 and multiple ankyrin repeat domains protein 1 OS=Homo sapiens GN=SHANK1 PE=4 SV=1
106	3607	tr|B2R7X3|B2R7X3_HUMAN	20.29	1	1	Oxidation (M)	61519	cDNA FLJ93645 highly similar to Homo sapiens chromatin assembly factor 1 subunit B (p60) (CHAF1B) mRNA OS=Homo sapiens PE=2 SV=1
15	3643	tr|Q59F25|Q59F25_HUMAN	49.54	1	1		182972	Alpha 3 type VI collagen isoform 5 variant (Fragment) OS=Homo sapiens PE=2 SV=1
88	5024	tr|Q6ZRU0|Q6ZRU0_HUMAN	25.58	1	1		22343	cDNA FLJ46111 fis clone TESTI2034913 moderately similar to Keratin type II cytoskeletal 8 OS=Homo sapiens PE=2 SV=1
76	5040	P04080|CYTB_HUMAN	63.92	1	1		11140	Cystatin-B OS=Homo sapiens GN=CSTB PE=1 SV=2
76	5041	tr|Q76LA1|Q76LA1_HUMAN	63.92	1	1		11140	CSTB protein OS=Homo sapiens GN=CSTB PE=2 SV=1
76	6995	tr|B4E216|B4E216_HUMAN	28.72	1	1		122592	cDNA FLJ57339 highly similar to Complement C3 OS=Homo sapiens PE=2 SV=1
76	6996	P01024|CO3_HUMAN	28.72	1	1		187147	Complement C3 OS=Homo sapiens GN=C3 PE=1 SV=2
72	7735	Q6UVK1|CSPG4_HUMAN	22.8	1	1		250534	Chondroitin sulfate proteoglycan 4 OS=Homo sapiens GN=CSPG4 PE=1 SV=2
50	9560	tr|B4DKX6|B4DKX6_HUMAN	27.8	1	1		112269	cDNA FLJ53584 highly similar to Desmoplakin (Fragment) OS=Homo sapiens PE=2 SV=1
54	12448	A6NNZ2|TBB8L_HUMAN	25.29	1	1		49573	Tubulin beta-8 chain-like protein LOC260334 OS=Homo sapiens PE=1 SV=1
45	14882	Q9HC84|MUC5B_HUMAN	24.21	1	1		596344	Mucin-5B OS=Homo sapiens GN=MUC5B PE=1 SV=3
45	14883	tr|A7Y9J9|A7Y9J9_HUMAN	24.21	1	1		648809	Mucin 5AC oligomeric mucus/gel-forming OS=Homo sapiens GN=MUC5AC PE=2 SV=1
16	15151	Q96JG9|ZN469_HUMAN	21.76	1	1		410207	Zinc finger protein 469 OS=Homo sapiens GN=ZNF469 PE=2 SV=3
16	15152	tr|H3BS19|H3BS19_HUMAN	21.76	1	1		413330	Zinc finger protein 469 OS=Homo sapiens GN=ZNF469 PE=4 SV=1
69	15713	P35590|TIE1_HUMAN	22.12	1	1		125090	Tyrosine-protein kinase receptor Tie-1 OS=Homo sapiens OX=9606 GN=TIE1 PE=1 SV=1
50	34155	Q8IZY2|ABCA7_HUMAN	22.4	1	1		234347	Phospholipid-transporting ATPase ABCA7 OS=Homo sapiens OX=9606 GN=ABCA7 PE=1 SV=3
43	38254	tr|E7EX21|E7EX21_HUMAN	33.97	1	1		57651	Collagen alpha-1(XIII) chain OS=Homo sapiens OX=9606 GN=COL13A1 PE=1 SV=1
35	38567	sp|Q14517|FAT1_HUMAN	23.09	1	1		506278	Protocadherin Fat 1 OS=Homo sapiens OX=9606 GN=FAT1 PE=1 SV=2
75	38821	tr|A0A0A0MTE8|A0A0A0MTE8_HUMAN	26.98	2	1		268278	Neuron navigator 2 OS=Homo sapiens OX=9606 GN=NAV2 PE=1 SV=1
59	38860	tr|H3BS19|H3BS19_HUMAN	30.22	3	2		413300	Zinc finger protein 469 OS=Homo sapiens OX=9606 GN=ZNF469 PE=1 SV=2
95	38873	sp|Q15751|HERC1_HUMAN	26.74	2	1		532234	Probable E3 ubiquitin-protein ligase HERC1 OS=Homo sapiens OX=9606 GN=HERC1 PE=1 SV=2
78	39128	Q9P2Q2|FRM4A_HUMAN	22.22	1	1		115458	FERM domain-containing protein 4A OS=Homo sapiens OX=9606 GN=FRMD4A PE=1 SV=3
73	42467	Q9Y566|SHAN1_HUMAN	20.61	1	1		224956	SH3 and multiple ankyrin repeat domains protein 1 OS=Homo sapiens OX=9606 GN=SHANK1 PE=1 SV=2
67	46679	P02458|CO2A1_HUMAN	46.23	1	1		141786	Collagen alpha-1(II) chain OS=Homo sapiens OX=9606 GN=COL2A1 PE=1 SV=3
42	48457	tr|A0A590UJJ6|A0A590UJJ6_HUMAN	21.66	1	1		13655	Histone H3 OS=Homo sapiens OX=9606 GN=H3-3A PE=1 SV=1
143	48520	sp|P13645|K1C10_HUMAN	24.22	2	1	Mutation	58827	Keratin type I cytoskeletal 10 OS=Homo sapiens OX=9606 GN=KRT10 PE=1 SV=6
41	48557	tr|A0A0A0MS08|A0A0A0MS08_HUMAN	61.69	1	1	Carbamidomethylation	43912	Immunoglobulin heavy constant gamma 1 (Fragment) OS=Homo sapiens OX=9606 GN=IGHG1 PE=1 SV=1
44	48601	tr|H0YIS1|H0YIS1_HUMAN	27.91	1	1		159879	Collagen alpha-2(XI) chain OS=Homo sapiens OX=9606 GN=COL11A2 PE=1 SV=1
41	48677	tr|A0A286YEY4|A0A286YEY4_HUMAN	61.69	1	1	Carbamidomethylation	43806	Immunoglobulin heavy constant gamma 2 (Fragment) OS=Homo sapiens OX=9606 GN=IGHG2 PE=1 SV=1
41	48688	tr|A0A286YES1|A0A286YES1_HUMAN	61.69	1	1	Carbamidomethylation	49141	Immunoglobulin heavy constant gamma 3 (Fragment) OS=Homo sapiens OX=9606 GN=IGHG3 PE=1 SV=1
22	48700	tr|D6RAI2|D6RAI2_HUMAN	20.02	1	1		7668	Mitogen-activated protein kinase-binding protein 1 OS=Homo sapiens OX=9606 GN=MAPKBP1 PE=1 SV=1
22	48732	tr|D6R9F7|D6R9F7_HUMAN	20.02	1	1		16937	Mitogen-activated protein kinase-binding protein 1 (Fragment) OS=Homo sapiens OX=9606 GN=MAPKBP1 PE=1 SV=1
22	48753	tr|Q5T987|Q5T987_HUMAN	20.02	1	1		26821	Inter-alpha-trypsin inhibitor heavy chain H2 (Fragment) OS=Homo sapiens OX=9606 GN=ITIH2 PE=1 SV=1
22	48778	tr|D6RHX7|D6RHX7_HUMAN	20.02	1	1		36273	Mitogen-activated protein kinase-binding protein 1 OS=Homo sapiens OX=9606 GN=MAPKBP1 PE=1 SV=1
22	48800	tr|H0YDZ5|H0YDZ5_HUMAN	20.02	1	1		48574	Hypoxia inducible factor 3 alpha subunit isoform CRA_a OS=Homo sapiens OX=9606 GN=HIF3A PE=4 SV=2
86	48803	sp|P12107|COBA1_HUMAN	28.19	2	1		181064	Collagen alpha-1(XI) chain OS=Homo sapiens OX=9606 GN=COL11A1 PE=1 SV=4
22	48820	tr|M0R104|M0R104_HUMAN	20.02	1	1		64082	Hypoxia-inducible factor 3-alpha OS=Homo sapiens OX=9606 GN=HIF3A PE=4 SV=1
22	48836	sp|Q9Y2N7|HIF3A_HUMAN	20.02	1	1		72433	Hypoxia-inducible factor 3-alpha OS=Homo sapiens OX=9606 GN=HIF3A PE=1 SV=2
22	48904	tr|Q5T985|Q5T985_HUMAN	20.02	1	1		105216	Inter-alpha-trypsin inhibitor heavy chain H2 OS=Homo sapiens OX=9606 GN=ITIH2 PE=1 SV=1
22	48907	sp|P19823|ITIH2_HUMAN	20.02	1	1		106463	Inter-alpha-trypsin inhibitor heavy chain H2 OS=Homo sapiens OX=9606 GN=ITIH2 PE=1 SV=2
44	48911	tr|Q4VXY6|Q4VXY6_HUMAN	27.91	1	1		162184	Collagen alpha-2(XI) chain OS=Homo sapiens OX=9606 GN=COL11A2 PE=1 SV=1
63	48916	tr|H0YLT1|H0YLT1_HUMAN	23.45	1	1		10763	Aldehyde dehydrogenase family 1 member A3 OS=Homo sapiens OX=9606 GN=ALDH1A3 PE=1 SV=1
16	48927	sp|P19013|K2C4_HUMAN	43.07	2	2	Carbamidomethylation	56144	Keratin type II cytoskeletal 4 OS=Homo sapiens OX=9606 GN=KRT4 PE=1 SV=5
44	49541	tr|A0A5H1ZRP3|A0A5H1ZRP3_HUMAN	20.46	1	1		183583	Methylcytosine dioxygenase TET3 OS=Homo sapiens OX=9606 GN=TET3 PE=1 SV=1
65	49556	tr|E9PF42|E9PF42_HUMAN	21.72	1	1		108606	von Willebrand factor A domain-containing protein 5B2 OS=Homo sapiens OX=9606 GN=VWA5B2 PE=1 SV=1
20	49617	sp|Q7Z5P9|MUC19_HUMAN	28.24	2	2		805275	Mucin-19 OS=Homo sapiens OX=9606 GN=MUC19 PE=1 SV=3
62	49746	sp|Q5VST9|OBSCN_HUMAN	27.23	2	1		868496	Obscurin OS=Homo sapiens OX=9606 GN=OBSCN PE=1 SV=3
16	49757	tr|E7EQT2|E7EQT2_HUMAN	20.72	1	1		436111	Mucin-4 OS=Homo sapiens OX=9606 GN=MUC4 PE=1 SV=1
16	49758	tr|A0A0G2JR43|A0A0G2JR43_HUMAN	20.72	1	1		439213	Mucin-4 (Fragment) OS=Homo sapiens OX=9606 GN=MUC4 PE=1 SV=1
16	49760	tr|A0A0G2JQT8|A0A0G2JQT8_HUMAN	20.72	1	1		533296	Mucin-4 (Fragment) OS=Homo sapiens OX=9606 GN=MUC4 PE=1 SV=1
16	49761	tr|E7ENC5|E7ENC5_HUMAN	20.72	1	1		536230	Mucin-4 OS=Homo sapiens OX=9606 GN=MUC4 PE=1 SV=1
16	49763	tr|A0A0G2JRA1|A0A0G2JRA1_HUMAN	20.72	1	1		539362	Mucin-4 (Fragment) OS=Homo sapiens OX=9606 GN=MUC4 PE=1 SV=1
16	49764	tr|E9PDY6|E9PDY6_HUMAN	20.72	1	1		542314	Mucin-4 OS=Homo sapiens OX=9606 GN=MUC4 PE=1 SV=1
16	49765	tr|A0A0G2JRT1|A0A0G2JRT1_HUMAN	20.72	1	1		501902	Mucin-4 (Fragment) OS=Homo sapiens OX=9606 GN=MUC4 PE=1 SV=1
16	49767	tr|E7EWN1|E7EWN1_HUMAN	20.72	1	1		504943	Mucin-4 OS=Homo sapiens OX=9606 GN=MUC4 PE=1 SV=1
16	49769	tr|A0A0G2JS65|A0A0G2JS65_HUMAN	20.72	1	1		734631	Mucin-4 OS=Homo sapiens OX=9606 GN=MUC4 PE=1 SV=1
16	49770	tr|A0A0G2JRS2|A0A0G2JRS2_HUMAN	20.72	1	1		621952	Mucin-4 OS=Homo sapiens OX=9606 GN=MUC4 PE=1 SV=1
16	49771	tr|A0A0G2JRD8|A0A0G2JRD8_HUMAN	20.72	1	1		626137	Mucin-4 OS=Homo sapiens OX=9606 GN=MUC4 PE=1 SV=1
16	49774	tr|A0A0G2JQK9|A0A0G2JQK9_HUMAN	20.72	1	1		697260	Mucin-4 OS=Homo sapiens OX=9606 GN=MUC4 PE=1 SV=1
36	49824	sp|Q9Y490|TLN1_HUMAN	21.84	1	1		269765	Talin-1 OS=Homo sapiens OX=9606 GN=TLN1 PE=1 SV=3
34	50131	sp|Q8TE49|OTU7A_HUMAN	32.85	2	2		100677	OTU domain-containing protein 7A OS=Homo sapiens OX=9606 GN=OTUD7A PE=1 SV=1
111	50134	sp|Q9NUQ8|ABCF3_HUMAN	25.08	2	1		79745	ATP-binding cassette sub-family F member 3 OS=Homo sapiens OX=9606 GN=ABCF3 PE=1 SV=2
35	50237	sp|Q8NB49|AT11C_HUMAN	23.09	1	1		129477	Phospholipid-transporting ATPase IG OS=Homo sapiens OX=9606 GN=ATP11C PE=1 SV=3
47	50374	tr|A0A0G2JHC2|A0A0G2JHC2_HUMAN	21.74	1	1		68042	PPP1R18 OS=Homo sapiens OX=9606 GN=PPP1R18 PE=1 SV=1
16	50706	sp|Q96PY6|NEK1_HUMAN	23.42	1	1		142828	Serine/threonine-protein kinase Nek1 OS=Homo sapiens OX=9606 GN=NEK1 PE=1 SV=2
40	50784	tr|J3KQ26|J3KQ26_HUMAN	24.75	1	1		108067	Armadillo repeat-containing protein 5 OS=Homo sapiens OX=9606 GN=ARMC5 PE=1 SV=1
47	50988	tr|E9PSF2|E9PSF2_HUMAN	21.74	1	1		141069	SCL-interrupting locus protein OS=Homo sapiens OX=9606 GN=STIL PE=1 SV=1
18	51076	sp|Q9P2R6|RERE_HUMAN	27.59	1	1	Carbamidomethylation	172423	Arginine-glutamic acid dipeptide repeats protein OS=Homo sapiens OX=9606 GN=RERE PE=1 SV=2
16	51080	sp|P54132|BLM_HUMAN	23.42	1	1		159000	Bloom syndrome protein OS=Homo sapiens OX=9606 GN=BLM PE=1 SV=1
46	51182	sp|Q6ZUA9|MROH5_HUMAN	35.91	2	1		149090	Maestro heat-like repeat family member 5 OS=Homo sapiens OX=9606 GN=MROH5 PE=2 SV=2
25	51346	sp|Q9Y4F5|C170B_HUMAN	30.51	2	2		171687	Centrosomal protein of 170 kDa protein B OS=Homo sapiens OX=9606 GN=CEP170B PE=1 SV=4
24	51804	sp|Q6V0I7|FAT4_HUMAN	33.51	2	2		542693	Protocadherin Fat 4 OS=Homo sapiens OX=9606 GN=FAT4 PE=1 SV=2
33	51845	sp|Q99715|COCA1_HUMAN	20.91	1	1		333147	Collagen alpha-1(XII) chain OS=Homo sapiens OX=9606 GN=COL12A1 PE=1 SV=2
20	51875	tr|A0A5F9ZI30|A0A5F9ZI30_HUMAN	20.41	1	1	Carbamidomethylation	418442	Ankyrin-2 OS=Homo sapiens OX=9606 GN=ANK2 PE=1 SV=1
20	51877	tr|A0A5F9ZGY4|A0A5F9ZGY4_HUMAN	20.41	1	1	Carbamidomethylation	421620	Ankyrin-2 OS=Homo sapiens OX=9606 GN=ANK2 PE=1 SV=1
20	51881	tr|A0A5F9ZHT4|A0A5F9ZHT4_HUMAN	20.41	1	1	Carbamidomethylation	424438	Ankyrin-2 OS=Homo sapiens OX=9606 GN=ANK2 PE=1 SV=1
20	51882	tr|A0A5F9ZGZ5|A0A5F9ZGZ5_HUMAN	20.41	1	1	Carbamidomethylation	424240	Ankyrin-2 (Fragment) OS=Homo sapiens OX=9606 GN=ANK2 PE=1 SV=1
20	51883	tr|A0A5F9ZI65|A0A5F9ZI65_HUMAN	20.41	1	1	Carbamidomethylation	425162	Ankyrin-2 OS=Homo sapiens OX=9606 GN=ANK2 PE=1 SV=1
20	51884	tr|A0A5F9ZI46|A0A5F9ZI46_HUMAN	20.41	1	1	Carbamidomethylation	425754	Ankyrin-2 OS=Homo sapiens OX=9606 GN=ANK2 PE=1 SV=1
20	51885	tr|A0A5F9ZH19|A0A5F9ZH19_HUMAN	20.41	1	1	Carbamidomethylation	426936	Ankyrin-2 OS=Homo sapiens OX=9606 GN=ANK2 PE=1 SV=1
20	51886	tr|A0A5F9ZI40|A0A5F9ZI40_HUMAN	20.41	1	1	Carbamidomethylation	429216	Ankyrin-2 OS=Homo sapiens OX=9606 GN=ANK2 PE=1 SV=1
20	51889	tr|A0A5F9ZGY3|A0A5F9ZGY3_HUMAN	20.41	1	1	Carbamidomethylation	431441	Ankyrin-2 OS=Homo sapiens OX=9606 GN=ANK2 PE=1 SV=1
20	51890	tr|A0A5F9ZHD2|A0A5F9ZHD2_HUMAN	20.41	1	1	Carbamidomethylation	431359	Ankyrin 2 neuronal isoform CRA_b OS=Homo sapiens OX=9606 GN=ANK2 PE=1 SV=1
20	51891	tr|A0A5F9ZHR8|A0A5F9ZHR8_HUMAN	20.41	1	1	Carbamidomethylation	432321	Ankyrin-2 OS=Homo sapiens OX=9606 GN=ANK2 PE=1 SV=1
20	51892	sp|Q01484|ANK2_HUMAN	20.41	1	1	Carbamidomethylation	433719	Ankyrin-2 OS=Homo sapiens OX=9606 GN=ANK2 PE=1 SV=4
20	51894	tr|A0A5F9ZHE4|A0A5F9ZHE4_HUMAN	20.41	1	1	Carbamidomethylation	434531	Ankyrin-2 OS=Homo sapiens OX=9606 GN=ANK2 PE=1 SV=1
20	51895	tr|A0A5F9ZGX3|A0A5F9ZGX3_HUMAN	20.41	1	1	Carbamidomethylation	435782	Ankyrin-2 OS=Homo sapiens OX=9606 GN=ANK2 PE=1 SV=1
20	51897	tr|A0A5F9ZHS1|A0A5F9ZHS1_HUMAN	20.41	1	1	Carbamidomethylation	437098	Ankyrin-2 OS=Homo sapiens OX=9606 GN=ANK2 PE=1 SV=1
20	51898	tr|A0A5F9ZH30|A0A5F9ZH30_HUMAN	20.41	1	1	Carbamidomethylation	438073	Ankyrin-2 OS=Homo sapiens OX=9606 GN=ANK2 PE=1 SV=1
71	68886	A2VEC9|SSPO_HUMAN	21.14	1	1		547508	SCO-spondin OS=Homo sapiens GN=SSPO PE=2 SV=1
43	68981	tr|Q3ZB86|Q3ZB86_HUMAN	21.22	1	1		106365	RBM15 protein OS=Homo sapiens GN=RBM15 PE=2 SV=1
44	69010	tr|H0YHY3|H0YHY3_HUMAN	27.91	1	1		156920	Collagen alpha-2(XI) chain OS=Homo sapiens GN=COL11A2 PE=4 SV=1
44	69020	tr|H0Y6C5|H0Y6C5_HUMAN	27.91	1	1		159288	Collagen alpha-2(XI) chain (Fragment) OS=Homo sapiens GN=COL11A2 PE=4 SV=1
44	69029	tr|E7EMX6|E7EMX6_HUMAN	27.91	1	1		159820	Collagen alpha-2(XI) chain OS=Homo sapiens GN=COL11A2 PE=2 SV=1
44	69039	tr|B0UXE9|B0UXE9_HUMAN	27.91	1	1		162125	Collagen alpha-2(XI) chain OS=Homo sapiens GN=COL11A2 PE=4 SV=1
44	69042	tr|E7ETH3|E7ETH3_HUMAN	27.91	1	1		162970	Collagen alpha-2(XI) chain OS=Homo sapiens GN=COL11A2 PE=4 SV=1
44	69043	tr|E7ERP3|E7ERP3_HUMAN	27.91	1	1		162911	Collagen alpha-2(XI) chain OS=Homo sapiens GN=COL11A2 PE=2 SV=1
44	69044	tr|H0Y3B3|H0Y3B3_HUMAN	27.91	1	1		162971	Collagen alpha-2(XI) chain OS=Homo sapiens GN=COL11A2 PE=4 SV=1
44	69061	tr|E7EUR3|E7EUR3_HUMAN	27.91	1	1		165275	Collagen alpha-2(XI) chain OS=Homo sapiens GN=COL11A2 PE=4 SV=1
44	69062	tr|E7END8|E7END8_HUMAN	27.91	1	1		165216	Collagen alpha-2(XI) chain OS=Homo sapiens GN=COL11A2 PE=2 SV=1
44	69067	tr|H0YHN2|H0YHN2_HUMAN	27.91	1	1		165723	Collagen alpha-2(XI) chain OS=Homo sapiens GN=COL11A2 PE=4 SV=1
40	69071	tr|H0YHM9|H0YHM9_HUMAN	32.48	2	2		166376	Collagen alpha-2(XI) chain OS=Homo sapiens GN=COL11A2 PE=4 SV=1
44	69072	tr|E7EV22|E7EV22_HUMAN	27.91	1	1		166317	Collagen alpha-2(XI) chain OS=Homo sapiens GN=COL11A2 PE=2 SV=1
44	69087	tr|E9PE40|E9PE40_HUMAN	27.91	1	1		168623	Collagen alpha-2(XI) chain OS=Homo sapiens GN=COL11A2 PE=2 SV=1
44	69088	tr|H0Y3B5|H0Y3B5_HUMAN	27.91	1	1		168682	Collagen alpha-2(XI) chain OS=Homo sapiens GN=COL11A2 PE=4 SV=1
44	69092	tr|E7EQ71|E7EQ71_HUMAN	27.91	1	1		169408	Collagen alpha-2(XI) chain OS=Homo sapiens GN=COL11A2 PE=2 SV=1
44	69093	tr|E7EP47|E7EP47_HUMAN	27.91	1	1		169468	Collagen alpha-2(XI) chain OS=Homo sapiens GN=COL11A2 PE=4 SV=1
44	69094	tr|H0YHM5|H0YHM5_HUMAN	27.91	1	1		169468	Collagen alpha-2(XI) chain OS=Homo sapiens GN=COL11A2 PE=4 SV=1
44	69106	tr|E7ERR1|E7ERR1_HUMAN	27.91	1	1		171773	Collagen alpha-2(XI) chain OS=Homo sapiens GN=COL11A2 PE=4 SV=1
44	69107	tr|E9PB88|E9PB88_HUMAN	27.91	1	1		171714	Collagen alpha-2(XI) chain OS=Homo sapiens GN=COL11A2 PE=2 SV=1
42	69204	tr|Q6ZML5|Q6ZML5_HUMAN	20.66	1	1		72851	FLJ00268 protein (Fragment) OS=Homo sapiens GN=FLJ00268 PE=2 SV=1
85	69665	tr|Q2XND2|Q2XND2_HUMAN	20.25	1	1		55763	CYP2D6 variant OS=Homo sapiens GN=CYP2D6 PE=3 SV=1
89	69695	tr|F8VNV4|F8VNV4_HUMAN	20.4	1	1		188237	Uncharacterized protein OS=Homo sapiens PE=2 SV=1
40	69940	tr|I3L2N9|I3L2N9_HUMAN	45.59	2	1		44708	Uncharacterized protein OS=Homo sapiens PE=3 SV=1
40	69951	O76011|KRT34_HUMAN	45.59	2	1		49424	Keratin type I cuticular Ha4 OS=Homo sapiens GN=KRT34 PE=2 SV=2
40	69952	tr|I3L1M0|I3L1M0_HUMAN	45.59	2	1		49431	Uncharacterized protein OS=Homo sapiens PE=3 SV=1
26	70318	tr|F8VZH8|F8VZH8_HUMAN	25.46	1	1		190057	Protein unc-13 homolog A OS=Homo sapiens GN=UNC13A PE=2 SV=1
71	70402	tr|A8MXH5|A8MXH5_HUMAN	20.32	1	1		165317	Collagen alpha-6(IV) chain OS=Homo sapiens GN=COL4A6 PE=2 SV=1
71	70533	tr|B7ZMM7|B7ZMM7_HUMAN	20.32	1	1		161330	COL4A6 protein OS=Homo sapiens GN=COL4A6 PE=2 SV=1
43	70637	tr|A1A693|A1A693_HUMAN	21.22	1	1		99578	RNA binding motif protein 15 isoform L2 OS=Homo sapiens GN=RBM15 PE=2 SV=1
74	71159	tr|B3KTL4|B3KTL4_HUMAN	20.48	1	1		68001	cDNA FLJ38453 fis clone FEBRA2019663 highly similar to Homo sapiens DEAD (Asp-Glu-Ala-Asp) box polypeptide 42 (DDX42) transcript variant 2 mRNA OS=Homo sapiens PE=2 SV=1
106	71464	tr|E9PPJ0|E9PPJ0_HUMAN	28.06	2	1		98170	Splicing factor 3B subunit 2 OS=Homo sapiens GN=SF3B2 PE=2 SV=1
29	72447	tr|F5GZ12|F5GZ12_HUMAN	35.94	1	1		17342	Small proline-rich protein 3 OS=Homo sapiens GN=SPRR3 PE=2 SV=1
29	72448	Q9UBC9|SPRR3_HUMAN	35.94	1	1		18154	Small proline-rich protein 3 OS=Homo sapiens GN=SPRR3 PE=1 SV=2
29	72450	tr|B1AN48|B1AN48_HUMAN	35.94	1	1		17059	Small proline-rich protein 3 (Fragment) OS=Homo sapiens GN=SPRR3 PE=4 SV=1
43	72452	tr|E7ES56|E7ES56_HUMAN	33.97	1	1		67376	Collagen alpha-1(XIII) chain OS=Homo sapiens GN=COL13A1 PE=2 SV=1
43	72458	tr|E7ES50|E7ES50_HUMAN	33.97	1	1		62943	Collagen alpha-1(XIII) chain OS=Homo sapiens GN=COL13A1 PE=2 SV=2
52	72464	Q9Y6R7|FCGBP_HUMAN	27.21	1	1		572021	IgGFc-binding protein OS=Homo sapiens GN=FCGBP PE=1 SV=3
32	72467	Q96T37|RBM15_HUMAN	20.96	1	1		107188	Putative RNA-binding protein 15 OS=Homo sapiens GN=RBM15 PE=1 SV=2
54	72468	tr|Q6ZTX7|Q6ZTX7_HUMAN	23.84	1	1		67816	cDNA FLJ44133 fis clone THYMU2008725 highly similar to PROTEIN-TYROSINE PHOSPHATASE BETA (EC 3.1.3.48) OS=Homo sapiens PE=2 SV=1
54	72470	tr|Q86VA4|Q86VA4_HUMAN	23.84	1	1		86056	PTPRB protein OS=Homo sapiens GN=PTPRB PE=2 SV=1
54	72471	tr|Q68D73|Q68D73_HUMAN	23.84	1	1		102459	Putative uncharacterized protein DKFZp686H15164 OS=Homo sapiens GN=DKFZp686H15164 PE=2 SV=1
54	72472	tr|Q6AWC4|Q6AWC4_HUMAN	23.84	1	1		170309	Putative uncharacterized protein DKFZp686E2262 (Fragment) OS=Homo sapiens GN=DKFZp686E2262 PE=2 SV=1
54	72474	tr|F8VSD5|F8VSD5_HUMAN	23.84	1	1		176617	Receptor-type tyrosine-protein phosphatase beta OS=Homo sapiens GN=PTPRB PE=2 SV=1
57	72477	Q8TD06|AGR3_HUMAN	23.2	1	1		19171	Anterior gradient protein 3 homolog OS=Homo sapiens GN=AGR3 PE=1 SV=1
54	72478	tr|F8VU56|F8VU56_HUMAN	23.84	1	1		239563	Receptor-type tyrosine-protein phosphatase beta OS=Homo sapiens GN=PTPRB PE=2 SV=1
46	72480	Q99973|TEP1_HUMAN	20.47	1	1		290488	Telomerase protein component 1 OS=Homo sapiens GN=TEP1 PE=1 SV=2
59	72482	tr|H7C226|H7C226_HUMAN	21.94	1	1		19769	Lutropin-choriogonadotropic hormone receptor (Fragment) OS=Homo sapiens GN=LHCGR PE=4 SV=1
59	72483	tr|E9PDH1|E9PDH1_HUMAN	21.94	1	1		71728	Lutropin-choriogonadotropic hormone receptor OS=Homo sapiens GN=LHCGR PE=2 SV=1
75	72443	P29508|SPB3_HUMAN	21.42	1	1		44565	Serpin B3 OS=Homo sapiens GN=SERPINB3 PE=1 SV=2
75	72444	tr|Q5K634|Q5K634_HUMAN	21.42	1	1		44649	SCCA2/SCCA1 fusion protein isoform 1 OS=Homo sapiens PE=2 SV=1
62	72493	Q8NCU7|C2C4A_HUMAN	23.96	1	1		39744	C2 calcium-dependent domain-containing protein 4A OS=Homo sapiens GN=C2CD4A PE=2 SV=2
57	72496	tr|Q4JM46|Q4JM46_HUMAN	23.2	1	1		19979	AGR2 OS=Homo sapiens GN=AGR2 PE=2 SV=1
57	72497	tr|Q53G64|Q53G64_HUMAN	23.2	1	1		19963	Anterior gradient 2 homolog (Fragment) OS=Homo sapiens PE=2 SV=1
57	72498	tr|B2R7D7|B2R7D7_HUMAN	23.2	1	1		20007	cDNA FLJ93394 highly similar to Homo sapiens anterior gradient 2 homolog (Xenopus laevis) (AGR2) mRNA OS=Homo sapiens PE=2 SV=1
57	72499	O95994|AGR2_HUMAN	23.2	1	1		19979	Anterior gradient protein 2 homolog OS=Homo sapiens GN=AGR2 PE=1 SV=1
57	72501	tr|Q4JM47|Q4JM47_HUMAN	23.2	1	1		22238	AGR2 OS=Homo sapiens GN=AGR2 PE=2 SV=1
48	72513	tr|Q14014|Q14014_HUMAN	22.41	1	1		16954	PR310 c-K-ras protein (Fragment) OS=Homo sapiens PE=2 SV=1
48	72514	tr|Q14015|Q14015_HUMAN	22.41	1	1		16991	PR371 c-K-ras oncogene (Fragment) OS=Homo sapiens PE=2 SV=1
48	72515	P01116|RASK_HUMAN	22.41	1	1		21656	GTPase KRas OS=Homo sapiens GN=KRAS PE=1 SV=1
48	72516	P01112|RASH_HUMAN	22.41	1	1		21298	GTPase HRas OS=Homo sapiens GN=HRAS PE=1 SV=1
48	72517	tr|I1SRC5|I1SRC5_HUMAN	22.41	1	1		33983	UBE2L3/KRAS fusion protein OS=Homo sapiens PE=2 SV=1
78	72518	tr|Q5T376|Q5T376_HUMAN	22.22	1	1		60201	FERM domain containing 4A isoform CRA_c (Fragment) OS=Homo sapiens GN=FRMD4A PE=4 SV=1
78	72519	tr|F8WAN4|F8WAN4_HUMAN	22.22	1	1		113919	FERM domain-containing protein 4A OS=Homo sapiens GN=FRMD4A PE=2 SV=1
79	72523	tr|F1T0I9|F1T0I9_HUMAN	21.89	1	1		48934	Tubby-related protein 1 OS=Homo sapiens GN=TULP1 PE=2 SV=1
80	72525	tr|Q68D69|Q68D69_HUMAN	21.78	1	1		113384	Putative uncharacterized protein DKFZp779G1236 OS=Homo sapiens GN=DKFZp779G1236 PE=2 SV=1
70	72542	tr|Q495P6|Q495P6_HUMAN	20.48	1	1		119814	Toll-like receptor 8 OS=Homo sapiens GN=TLR8 PE=2 SV=1
70	72543	Q9NR97|TLR8_HUMAN	20.48	1	1		119828	Toll-like receptor 8 OS=Homo sapiens GN=TLR8 PE=1 SV=1
70	72544	tr|Q495P7|Q495P7_HUMAN	20.48	1	1		119775	Toll-like receptor 8 OS=Homo sapiens GN=TLR8 PE=2 SV=1
70	72545	tr|D1CS76|D1CS76_HUMAN	20.48	1	1		121763	TLR8 OS=Homo sapiens GN=TLR8 PE=2 SV=1
70	72546	tr|D1CS70|D1CS70_HUMAN	20.48	1	1		121764	TLR8 OS=Homo sapiens GN=TLR8 PE=4 SV=1
62	72574	tr|B4E2A0|B4E2A0_HUMAN	39.77	1	1		156303	cDNA FLJ61543 highly similar to Desmoplakin OS=Homo sapiens PE=2 SV=1
25	72601	tr|J3QK86|J3QK86_HUMAN	22.71	1	1		207814	Bromodomain adjacent to zinc finger domain protein 2A OS=Homo sapiens GN=BAZ2A PE=4 SV=1
66	72731	tr|A1A5C4|A1A5C4_HUMAN	22.42	1	1		102825	RRBP1 protein OS=Homo sapiens GN=RRBP1 PE=2 SV=1
28	72867	Q9NR82|KCNQ5_HUMAN	23.01	1	1		102179	Potassium voltage-gated channel subfamily KQT member 5 OS=Homo sapiens GN=KCNQ5 PE=1 SV=3
28	72868	tr|F8WEA4|F8WEA4_HUMAN	23.01	1	1		102163	Potassium voltage-gated channel subfamily KQT member 5 OS=Homo sapiens GN=KCNQ5 PE=2 SV=1
52	72958	tr|B7ZLC8|B7ZLC8_HUMAN	22.23	1	1		263153	JMJD1C protein OS=Homo sapiens GN=JMJD1C PE=2 SV=1
49	73117	tr|H3BSU3|H3BSU3_HUMAN	36	1	1		18295	Pyruvate kinase (Fragment) OS=Homo sapiens GN=PKM PE=3 SV=1
26	73160	tr|F8W059|F8W059_HUMAN	25.46	1	1		195129	Protein unc-13 homolog A OS=Homo sapiens GN=UNC13A PE=2 SV=1
45	73202	tr|E9PBJ0|E9PBJ0_HUMAN	24.21	1	1		596691	Mucin-5B OS=Homo sapiens GN=MUC5B PE=2 SV=1
37	73225	tr|A0AVL1|A0AVL1_HUMAN	23.39	1	1		78539	ADAM9 protein OS=Homo sapiens GN=ADAM9 PE=2 SV=1
53	73932	tr|H0YLD8|H0YLD8_HUMAN	23.25	1	1		29803	SH2 domain-containing adapter protein F OS=Homo sapiens GN=SHF PE=4 SV=1
101	74031	tr|B4DKX3|B4DKX3_HUMAN	21.45	1	1		90316	cDNA FLJ51228 highly similar to Probable ATP-dependent RNA helicase DDX10 (EC 3.6.1.-) OS=Homo sapiens PE=2 SV=1
51	74764	Q9NZR2|LRP1B_HUMAN	22.12	1	1	Carbamidomethylation	515501	Low-density lipoprotein receptor-related protein 1B OS=Homo sapiens GN=LRP1B PE=1 SV=2
61	80565	tr|E9PER1|E9PER1_HUMAN	25.46	1	1		170439	Disco-interacting protein 2 homolog A OS=Homo sapiens GN=DIP2A PE=2 SV=1
81	80866	tr|F8W1J3|F8W1J3_HUMAN	21.05	1	1		145937	Protein PRRC2A OS=Homo sapiens GN=PRRC2A PE=2 SV=1
81	80867	tr|F8VVM9|F8VVM9_HUMAN	21.05	1	1		145892	Protein PRRC2A OS=Homo sapiens GN=PRRC2A PE=4 SV=1
81	80868	tr|F8VVQ5|F8VVQ5_HUMAN	21.05	1	1		145921	Protein PRRC2A OS=Homo sapiens GN=PRRC2A PE=4 SV=1
28	82274	tr|A6PVT6|A6PVT6_HUMAN	23.01	1	1		104542	Potassium voltage-gated channel subfamily KQT member 5 OS=Homo sapiens GN=KCNQ5 PE=4 SV=1
86	94621	tr|B7Z5Q2|B7Z5Q2_HUMAN	46.08	1	1		108822	cDNA FLJ58075 highly similar to Ceruloplasmin (EC 1.16.3.1) OS=Homo sapiens PE=2 SV=1
86	94622	tr|A5PL27|A5PL27_HUMAN	46.08	1	1		122205	CP protein OS=Homo sapiens GN=CP PE=2 SV=1
66	94847	tr|Q9Y355|Q9Y355_HUMAN	28.14	1	1		7433	Apolipoprotein A1 (Fragment) OS=Homo sapiens PE=2 SV=1
81	94860	tr|B4DLY2|B4DLY2_HUMAN	21.05	1	1		145907	cDNA FLJ56600 highly similar to Large proline-rich protein BAT2 OS=Homo sapiens PE=2 SV=1
60	95317	Q8NG31|CASC5_HUMAN	20.85	1	1		265389	Protein CASC5 OS=Homo sapiens GN=CASC5 PE=1 SV=3
37	98035	tr|B4DE36|B4DE36_HUMAN	44.6	1	1		60186	Glucose-6-phosphate isomerase OS=Homo sapiens PE=2 SV=1
37	98036	tr|B4DVJ0|B4DVJ0_HUMAN	44.6	1	1		59991	Glucose-6-phosphate isomerase OS=Homo sapiens PE=2 SV=1
37	98037	P06744|G6PI_HUMAN	44.6	1	1		63147	Glucose-6-phosphate isomerase OS=Homo sapiens GN=GPI PE=1 SV=4
64	98038	tr|F8W9L1|F8W9L1_HUMAN	48.17	1	1		38837	Serpin B4 OS=Homo sapiens GN=SERPINB4 PE=2 SV=1
65	98039	tr|B4E2A4|B4E2A4_HUMAN	29.98	1	1		110293	cDNA FLJ53275 highly similar to Homo sapiens spectrin domain with coiled-coils 1 (SPECC1) transcript variant mRNA OS=Homo sapiens PE=2 SV=1
40	98045	tr|F8VS93|F8VS93_HUMAN	28.24	1	1		7443	Keratin type II cytoskeletal 78 (Fragment) OS=Homo sapiens GN=KRT78 PE=2 SV=1
36	98049	P35321|SPR1A_HUMAN	25.32	1	1	Carbamidomethylation	9877	Cornifin-A OS=Homo sapiens GN=SPRR1A PE=1 SV=2
36	98050	P22528|SPR1B_HUMAN	25.32	1	1	Carbamidomethylation	9888	Cornifin-B OS=Homo sapiens GN=SPRR1B PE=1 SV=2
81	98054	tr|B4DEA8|B4DEA8_HUMAN	26.29	1	1		75210	cDNA FLJ56425 highly similar to Very-long-chain specific acyl-CoAdehydrogenase mitochondrial (EC 1.3.99.-) OS=Homo sapiens PE=2 SV=1
51	98055	tr|D6RFX7|D6RFX7_HUMAN	26.04	1	1		23549	Protein FAM117A (Fragment) OS=Homo sapiens GN=FAM117A PE=2 SV=1
28	98057	tr|A8MSQ5|A8MSQ5_HUMAN	23.01	1	1		102365	Potassium voltage-gated channel subfamily KQT member 5 OS=Homo sapiens GN=KCNQ5 PE=2 SV=1
36	98060	tr|B7ZLF8|B7ZLF8_HUMAN	25.32	1	1	Carbamidomethylation	9936	Putative uncharacterized protein OS=Homo sapiens PE=2 SV=1
47	98073	tr|J3KPG5|J3KPG5_HUMAN	31.72	1	1		208074	Bromodomain adjacent to zinc finger domain protein 2A OS=Homo sapiens GN=BAZ2A PE=4 SV=1
47	98074	Q9UIF9|BAZ2A_HUMAN	31.72	1	1		211196	Bromodomain adjacent to zinc finger domain protein 2A OS=Homo sapiens GN=BAZ2A PE=1 SV=4
62	98112	tr|H0YBB2|H0YBB2_HUMAN	23.14	1	1		37059	Collagen alpha-1(XIV) chain (Fragment) OS=Homo sapiens GN=COL14A1 PE=4 SV=1
62	98114	tr|A8KAL5|A8KAL5_HUMAN	23.14	1	1		122174	cDNA FLJ77224 highly similar to Homo sapiens collagen type XIV alpha 1 (undulin) (COL14A1) mRNA (Fragment) OS=Homo sapiens PE=2 SV=1
64	98125	O95198|KLHL2_HUMAN	20.48	1	1	Carbamidomethylation; Oxidation (M)	65975	Kelch-like protein 2 OS=Homo sapiens GN=KLHL2 PE=1 SV=2
85	98134	tr|B4DSN3|B4DSN3_HUMAN	22.43	1	1		106560	cDNA FLJ60345 highly similar to Protein transport protein Sec24C OS=Homo sapiens PE=2 SV=1
85	98135	P53992|SC24C_HUMAN	22.43	1	1		118325	Protein transport protein Sec24C OS=Homo sapiens GN=SEC24C PE=1 SV=3
74	98137	tr|B3KX23|B3KX23_HUMAN	20.48	1	1		73281	cDNA FLJ44516 fis clone UTERU3002600 highly similar to Homo sapiens DEAD (Asp-Glu-Ala-Asp) box polypeptide 42 (DDX42) transcript variant 2 mRNA OS=Homo sapiens PE=2 SV=1
74	98140	Q86XP3|DDX42_HUMAN	20.48	1	1		102975	ATP-dependent RNA helicase DDX42 OS=Homo sapiens GN=DDX42 PE=1 SV=1
76	98147	tr|H0Y3S1|H0Y3S1_HUMAN	21.96	1	1		77178	Dedicator of cytokinesis protein 9 (Fragment) OS=Homo sapiens GN=DOCK9 PE=4 SV=1
64	98153	tr|D6R9G5|D6R9G5_HUMAN	20.48	1	1	Carbamidomethylation; Oxidation (M)	16287	Kelch-like protein 2 (Fragment) OS=Homo sapiens GN=KLHL2 PE=2 SV=1
63	98430	tr|B7Z5V1|B7Z5V1_HUMAN	24.81	1	1		81490	cDNA FLJ55934 highly similar to Gelsolin OS=Homo sapiens PE=2 SV=1
63	98432	P06396|GELS_HUMAN	24.81	1	1		85697	Gelsolin OS=Homo sapiens GN=GSN PE=1 SV=1
16	98896	tr|E7ETT5|E7ETT5_HUMAN	20.72	1	1		442195	Mucin-4 beta chain OS=Homo sapiens GN=MUC4 PE=2 SV=1
94	98903	tr|C9JD84|C9JD84_HUMAN	26.68	2	2		147007	Latent-transforming growth factor beta-binding protein 1 OS=Homo sapiens GN=LTBP1 PE=2 SV=1
48	98940	tr|G9JKF1|G9JKF1_HUMAN	21.76	1	1		21668	Interferon alpha 1 OS=Homo sapiens PE=2 SV=1
48	98941	tr|L0N195|L0N195_HUMAN	21.76	1	1		21725	Interferon-alpha1 OS=Homo sapiens GN=IFNA1 PE=2 SV=1
48	98942	P01562|IFNA1_HUMAN	21.76	1	1		21725	Interferon alpha-1/13 OS=Homo sapiens GN=IFNA1 PE=1 SV=1
48	98943	tr|E9PB07|E9PB07_HUMAN	21.76	1	1		21828	Interferon alpha-1/13 OS=Homo sapiens GN=IFNA13 PE=3 SV=1
81	98947	tr|K7EIG7|K7EIG7_HUMAN	21.99	1	1		106006	Unconventional myosin-Id OS=Homo sapiens GN=MYO1D PE=4 SV=1
66	111301	tr|A1A5C5|A1A5C5_HUMAN	22.42	1	1		84307	RRBP1 protein OS=Homo sapiens GN=RRBP1 PE=2 SV=1
51	113433	tr|A8K3E4|A8K3E4_HUMAN	77.45	2	2		69713	cDNA FLJ78367 highly similar to Homo sapiens fibrinogen A alpha polypeptide (FGA) transcriptvariant alpha mRNA OS=Homo sapiens PE=2 SV=1
62	146621	Q8IYM2|SLN12_HUMAN	25.26	1	1		66973	Schlafen family member 12 OS=Homo sapiens GN=SLFN12 PE=1 SV=2
40	146626	Q86YV9|HPS6_HUMAN	22.63	1	1		82975	Hermansky-Pudlak syndrome 6 protein OS=Homo sapiens GN=HPS6 PE=1 SV=1
70	146672	tr|H0YD93|H0YD93_HUMAN	20.91	1	1		71443	RUN and FYVE domain-containing protein 2 (Fragment) OS=Homo sapiens GN=RUFY2 PE=4 SV=1
70	146673	Q8WXA3|RUFY2_HUMAN	20.91	1	1		75055	RUN and FYVE domain-containing protein 2 OS=Homo sapiens GN=RUFY2 PE=1 SV=2
72	146683	tr|F5H470|F5H470_HUMAN	20.29	1	1		93415	Glutamate receptor 3 OS=Homo sapiens GN=GRIA3 PE=2 SV=1
72	146684	P42263|GRIA3_HUMAN	20.29	1	1		101157	Glutamate receptor 3 OS=Homo sapiens GN=GRIA3 PE=1 SV=2
73	146685	tr|Q16824|Q16824_HUMAN	20.35	1	1		85176	Profilaggrin (Fragment) OS=Homo sapiens GN=FLG PE=2 SV=1
65	147136	P19652|A1AG2_HUMAN	47.54	1	1		23603	Alpha-1-acid glycoprotein 2 OS=Homo sapiens GN=ORM2 PE=1 SV=2
37	148215	tr|F8WC54|F8WC54_HUMAN	23.39	1	1		69324	Disintegrin and metalloproteinase domain-containing protein 9 OS=Homo sapiens GN=ADAM9 PE=2 SV=1
65	149694	Q4G0T1|SRCRM_HUMAN	20.12	1	1		108611	Putative scavenger receptor cysteine-rich domain-containing protein LOC619207 OS=Homo sapiens PE=5 SV=2
50	166137	tr|B4DWT7|B4DWT7_HUMAN	27.8	1	1		72533	cDNA FLJ51487 highly similar to Desmoplakin (Fragment) OS=Homo sapiens PE=2 SV=1
17	170494	tr|F8VX05|F8VX05_HUMAN	42.52	2	2	Carbamidomethylation	7789	Keratin type II cytoskeletal 4 OS=Homo sapiens GN=KRT4 PE=2 SV=1
17	170495	tr|F8VZR6|F8VZR6_HUMAN	42.52	2	2	Carbamidomethylation	8675	Keratin type II cytoskeletal 4 OS=Homo sapiens GN=KRT4 PE=2 SV=1
76	170502	tr|C9IYE1|C9IYE1_HUMAN	33.29	1	1		147584	Calcium-dependent secretion activator 2 OS=Homo sapiens GN=CADPS2 PE=2 SV=1
76	170503	Q86UW7|CAPS2_HUMAN	33.29	1	1		147734	Calcium-dependent secretion activator 2 OS=Homo sapiens GN=CADPS2 PE=1 SV=2
85	170549	tr|B7Z1K6|B7Z1K6_HUMAN	22.67	1	1		39002	cDNA FLJ54594 highly similar to SH3-containing GRB2-like protein 2 (EC 2.3.1.-) OS=Homo sapiens PE=2 SV=1
101	170562	tr|Q59EC7|Q59EC7_HUMAN	21.45	1	1		97363	DEAD (Asp-Glu-Ala-Asp) box polypeptide 10 variant (Fragment) OS=Homo sapiens PE=2 SV=1
105	170580	tr|E7EWW0|E7EWW0_HUMAN	20.88	1	1		118614	UPF0505 protein C16orf62 OS=Homo sapiens GN=C16orf62 PE=2 SV=2
106	170616	Q13112|CAF1B_HUMAN	20.29	1	1	Oxidation (M)	61493	Chromatin assembly factor 1 subunit B OS=Homo sapiens GN=CHAF1B PE=1 SV=1
38	172170	tr|E9PGC0|E9PGC0_HUMAN	26.29	1	1		101790	Ras GTPase-activating protein 1 OS=Homo sapiens GN=RASA1 PE=2 SV=1
81	184771	tr|Q7Z3N6|Q7Z3N6_HUMAN	21.99	1	1		105803	Putative uncharacterized protein DKFZp686A01173 (Fragment) OS=Homo sapiens GN=DKFZp686A01173 PE=2 SV=1
16	187214	tr|Q5QPR4|Q5QPR4_HUMAN	23.42	1	1		86824	Cyclin-dependent kinase 11A OS=Homo sapiens GN=CDK11A PE=4 SV=1
17	188446	tr|G3V5C1|G3V5C1_HUMAN	25.81	1	1		65598	Rho guanine nucleotide exchange factor 40 OS=Homo sapiens GN=ARHGEF40 PE=2 SV=1
51	188886	P02671|FIBA_HUMAN	77.45	2	2		94973	Fibrinogen alpha chain OS=Homo sapiens GN=FGA PE=1 SV=2
63	189292	tr|E7ETM1|E7ETM1_HUMAN	31.03	2	2	Acetylation (N-term)	191622	Protein very KIND OS=Homo sapiens GN=KNDC1 PE=2 SV=1
55	207965	tr|D3DP16|D3DP16_HUMAN	52.18	1	1		37738	Fibrinogen gamma chain isoform CRA_a OS=Homo sapiens GN=FGG PE=2 SV=1
55	207966	tr|C9JEU5|C9JEU5_HUMAN	52.18	1	1		50323	Fibrinogen gamma chain OS=Homo sapiens GN=FGG PE=2 SV=1
55	207967	P02679|FIBG_HUMAN	52.18	1	1		51512	Fibrinogen gamma chain OS=Homo sapiens GN=FGG PE=1 SV=3
55	207968	tr|C9JC84|C9JC84_HUMAN	52.18	1	1		52338	Fibrinogen gamma chain OS=Homo sapiens GN=FGG PE=2 SV=1
64	207974	tr|Q9BYH9|Q9BYH9_HUMAN	48.17	1	1		6246	Squamous cell carcinoma antigen 1 (Fragment) OS=Homo sapiens GN=SCCA1 PE=2 SV=1
64	207975	tr|O95740|O95740_HUMAN	48.17	1	1		11386	Squamous cell carcinoma antigen 2 (Fragment) OS=Homo sapiens PE=4 SV=1
65	207980	P02763|A1AG1_HUMAN	47.54	1	1		23512	Alpha-1-acid glycoprotein 1 OS=Homo sapiens GN=ORM1 PE=1 SV=1
74	207985	tr|Q49A90|Q49A90_HUMAN	33.06	1	1		10782	RPS27A protein OS=Homo sapiens GN=RPS27A PE=4 SV=1
69	207989	Q9BVQ7|SPA5L_HUMAN	21.77	1	1	Acetylation (N-term)	80710	Spermatogenesis-associated protein 5-like protein 1 OS=Homo sapiens GN=SPATA5L1 PE=1 SV=2
72	216709	tr|G3V544|G3V544_HUMAN	89.94	3	3		17097	Short peptide from AAT (Fragment) OS=Homo sapiens GN=SERPINA1 PE=2 SV=1
86	216713	tr|D6RE86|D6RE86_HUMAN	46.08	1	1		20863	Ceruloplasmin (Fragment) OS=Homo sapiens GN=CP PE=2 SV=1
86	216714	tr|Q6NSB2|Q6NSB2_HUMAN	46.08	1	1		24683	CP protein (Fragment) OS=Homo sapiens GN=CP PE=2 SV=1
86	216715	tr|E9PFZ2|E9PFZ2_HUMAN	46.08	1	1		108820	Ceruloplasmin OS=Homo sapiens GN=CP PE=2 SV=1
86	216716	tr|Q1L857|Q1L857_HUMAN	46.08	1	1		115472	Ceruloplasmin (Fragment) OS=Homo sapiens PE=2 SV=1
86	216717	tr|A8K5A4|A8K5A4_HUMAN	46.08	1	1		122172	cDNA FLJ76826 highly similar to Homo sapiens ceruloplasmin (ferroxidase) (CP) mRNA OS=Homo sapiens PE=2 SV=1
86	216718	P00450|CERU_HUMAN	46.08	1	1		122205	Ceruloplasmin OS=Homo sapiens GN=CP PE=1 SV=1
87	216719	tr|Q5SYZ4|Q5SYZ4_HUMAN	44.29	1	1		9252	Cellular retinoic acid binding protein 2 (Fragment) OS=Homo sapiens GN=CRABP2 PE=3 SV=1
87	216720	P29373|RABP2_HUMAN	44.29	1	1		15693	Cellular retinoic acid-binding protein 2 OS=Homo sapiens GN=CRABP2 PE=1 SV=2
79	216722	tr|F5GZ39|F5GZ39_HUMAN	35.46	1	1		6876	Polyubiquitin-C (Fragment) OS=Homo sapiens GN=UBC PE=2 SV=1
73	216723	tr|Q8NF60|Q8NF60_HUMAN	25.84	1	1	Acetylation (N-term)	30051	FLJ00327 protein (Fragment) OS=Homo sapiens GN=FLJ00327 PE=2 SV=1
73	216724	tr|H7C440|H7C440_HUMAN	25.84	1	1	Acetylation (N-term)	43544	DIS3-like exonuclease 2 (Fragment) OS=Homo sapiens GN=DIS3L2 PE=3 SV=1
73	216725	Q8IYB7|DI3L2_HUMAN	25.84	1	1	Acetylation (N-term)	99279	DIS3-like exonuclease 2 OS=Homo sapiens GN=DIS3L2 PE=1 SV=4
43	240815	tr|A2A2V2|A2A2V2_HUMAN	21.53	1	1		45918	Novel protein (Fragment) OS=Homo sapiens GN=RBM34 PE=4 SV=1
38	375160	tr|E9PRU1|E9PRU1_HUMAN	21.31	1	1		48192	EGF-containing fibulin-like extracellular matrix protein 2 OS=Homo sapiens GN=EFEMP2 PE=2 SV=1
31	400205	tr|A0A3B3IT64|A0A3B3IT64_HUMAN	27.91	2	2		155124	Low-density lipoprotein receptor-related protein 2 (Fragment) OS=Homo sapiens OX=9606 GN=LRP2 PE=1 SV=1
16	400357	tr|A0A0G2JR46|A0A0G2JR46_HUMAN	20.72	1	1		624952	Mucin-4 OS=Homo sapiens OX=9606 GN=MUC4 PE=1 SV=1
47	400555	tr|A0A2R8YFV2|A0A2R8YFV2_HUMAN	20.37	1	1		183743	Protein Wiz OS=Homo sapiens OX=9606 GN=WIZ PE=1 SV=1
19	400610	sp|O95785|WIZ_HUMAN	24.16	1	1		178673	Protein Wiz OS=Homo sapiens OX=9606 GN=WIZ PE=1 SV=2
60	400782	tr|A0A087WV90|A0A087WV90_HUMAN	23.5	1	1		426101	Dystrophin OS=Homo sapiens OX=9606 GN=DMD PE=1 SV=1
60	400783	tr|A0A087WTU7|A0A087WTU7_HUMAN	23.5	1	1		426850	Dystrophin OS=Homo sapiens OX=9606 GN=DMD PE=1 SV=1
66	400852	sp|Q71F56|MD13L_HUMAN	22.21	1	1		242599	Mediator of RNA polymerase II transcription subunit 13-like OS=Homo sapiens OX=9606 GN=MED13L PE=1 SV=1
53	400910	sp|Q9UQ35|SRRM2_HUMAN	24.34	1	1		299616	Serine/arginine repetitive matrix protein 2 OS=Homo sapiens OX=9606 GN=SRRM2 PE=1 SV=2
20	400933	tr|A0A5F9ZHN5|A0A5F9ZHN5_HUMAN	20.41	1	1	Carbamidomethylation	427899	Ankyrin-2 OS=Homo sapiens OX=9606 GN=ANK2 PE=1 SV=1
60	400941	tr|A0A075B6G3|A0A075B6G3_HUMAN	23.5	1	1		426779	Dystrophin OS=Homo sapiens OX=9606 GN=DMD PE=1 SV=1
35	415882	sp|Q5VW36|FOCAD_HUMAN	23.09	1	1		200071	Focadhesin OS=Homo sapiens OX=9606 GN=FOCAD PE=1 SV=1
16	415886	sp|Q14204|DYHC1_HUMAN	23.42	1	1		532412	Cytoplasmic dynein 1 heavy chain 1 OS=Homo sapiens OX=9606 GN=DYNC1H1 PE=1 SV=5
20	416821	tr|A0A5F9ZHF7|A0A5F9ZHF7_HUMAN	20.41	1	1	Carbamidomethylation	423475	Ankyrin-2 OS=Homo sapiens OX=9606 GN=ANK2 PE=1 SV=1
60	417501	tr|A0A5H1ZRP8|A0A5H1ZRP8_HUMAN	23.5	1	1		426030	Dystrophin OS=Homo sapiens OX=9606 GN=DMD PE=1 SV=1
222	422941	tr|B1AN99|B1AN99_HUMAN	24.02	2	2	Mutation	19288	Trypsin-3 (Fragment) OS=Homo sapiens OX=9606 GN=PRSS3 PE=1 SV=8
30	423005	tr|A0A087WSW1|A0A087WSW1_HUMAN	20.22	1	1		125689	Cilia- and flagella-associated protein 70 OS=Homo sapiens OX=9606 GN=CFAP70 PE=1 SV=2
39	423113	sp|Q7Z6J0|SH3R1_HUMAN	20.94	1	1		93129	E3 ubiquitin-protein ligase SH3RF1 OS=Homo sapiens OX=9606 GN=SH3RF1 PE=1 SV=2
24	423313	sp|Q8TD26|CHD6_HUMAN	25.25	1	1		305412	Chromodomain-helicase-DNA-binding protein 6 OS=Homo sapiens OX=9606 GN=CHD6 PE=1 SV=4
20	423489	tr|A0A5F9ZHT8|A0A5F9ZHT8_HUMAN	20.41	1	1	Carbamidomethylation	426797	Ankyrin-2 OS=Homo sapiens OX=9606 GN=ANK2 PE=1 SV=1
47	423538	sp|Q14126|DSG2_HUMAN	27.05	1	1		122294	Desmoglein-2 OS=Homo sapiens OX=9606 GN=DSG2 PE=1 SV=2
47	423540	tr|A0A0A0MR87|A0A0A0MR87_HUMAN	21.74	1	1		137830	SCL-interrupting locus protein OS=Homo sapiens OX=9606 GN=STIL PE=1 SV=1
47	423546	sp|Q15468|STIL_HUMAN	21.74	1	1		142954	SCL-interrupting locus protein OS=Homo sapiens OX=9606 GN=STIL PE=1 SV=2
28	423554	tr|B1AKD8|B1AKD8_HUMAN	24.1	1	1		149183	Rootletin (Fragment) OS=Homo sapiens OX=9606 GN=CROCC PE=1 SV=2
16	423614	tr|A0A1B0GUM1|A0A1B0GUM1_HUMAN	23.42	1	1		58820	Pleckstrin homology domain-containing family A member 7 (Fragment) OS=Homo sapiens OX=9606 GN=PLEKHA7 PE=1 SV=1
16	426712	tr|A0A0G2JN54|A0A0G2JN54_HUMAN	20.72	1	1		493852	Mucin-4 OS=Homo sapiens OX=9606 GN=MUC4 PE=1 SV=1
16	427002	sp|Q5JPF3|AN36C_HUMAN	31.47	2	1		199747	Ankyrin repeat domain-containing protein 36C OS=Homo sapiens OX=9606 GN=ANKRD36C PE=1 SV=3
110	427504	sp|P52333|JAK3_HUMAN	25.65	2	2		125099	Tyrosine-protein kinase JAK3 OS=Homo sapiens OX=9606 GN=JAK3 PE=1 SV=2
16	511957	F8VX05|F8VX05_HUMAN	43.07	2	2	Carbamidomethylation	7789	Keratin type II cytoskeletal 4 OS=Homo sapiens OX=9606 GN=KRT4 PE=1 SV=1
20	511959	A0A0S2Z3L8|A0A0S2Z3L8_HUMAN	32.02	1	1		16417	Decorin (Fragment) OS=Homo sapiens OX=9606 GN=DCN PE=2 SV=1
20	511960	Q6FH10|Q6FH10_HUMAN	32.02	1	1		39747	Decorin OS=Homo sapiens OX=9606 GN=DCN PE=2 SV=1
45	511966	J3QT83|J3QT83_HUMAN	28.59	1	1		92626	Collagen alpha-1(XIV) chain (Fragment) OS=Homo sapiens OX=9606 GN=COL14A1 PE=1 SV=1
45	511967	A8KAL5|A8KAL5_HUMAN	28.59	1	1		122174	cDNA FLJ77224 highly similar to Homo sapiens collagen type XIV alpha 1 (undulin) (COL14A1) mRNA (Fragment) OS=Homo sapiens OX=9606 PE=2 SV=1
45	511978	H0YBB2|H0YBB2_HUMAN	28.59	1	1		36960	Collagen alpha-1(XIV) chain (Fragment) OS=Homo sapiens OX=9606 GN=COL14A1 PE=1 SV=8
61	511981	B2R8J5|B2R8J5_HUMAN	27.2	1	1		76067	cDNA FLJ93928 highly similar to Homo sapiens PDZ domain containing ring finger 1 (PDZRN1) mRNA OS=Homo sapiens OX=9606 PE=2 SV=1
35	512013	A0A126GW26|A0A126GW26_HUMAN	23.09	1	1		35453	Olfactory receptor OS=Homo sapiens OX=9606 GN=OR6C70 PE=3 SV=1
35	512014	sp|A6NIJ9|O6C70_HUMAN	23.09	1	1		35468	Olfactory receptor 6C70 OS=Homo sapiens OX=9606 GN=OR6C70 PE=3 SV=1
35	512046	sp|P35858|ALS_HUMAN	23.09	1	1		66035	Insulin-like growth factor-binding protein complex acid labile subunit OS=Homo sapiens OX=9606 GN=IGFALS PE=1 SV=1
35	512049	A0A590UJ98|A0A590UJ98_HUMAN	23.09	1	1		92117	Low-density lipoprotein receptor-related protein 8 OS=Homo sapiens OX=9606 GN=LRP8 PE=1 SV=1
35	512056	A0A590UJ57|A0A590UJ57_HUMAN	23.09	1	1		97903	Low-density lipoprotein receptor-related protein 8 OS=Homo sapiens OX=9606 GN=LRP8 PE=1 SV=1
64	512086	Q9BVH8|Q9BVH8_HUMAN	22.89	1	1		106194	VWA5B2 protein (Fragment) OS=Homo sapiens OX=9606 GN=VWA5B2 PE=2 SV=1
65	512087	Q8N4P8|Q8N4P8_HUMAN	22.54	1	1		73709	Nucleolar GTP-binding protein 1 (Fragment) OS=Homo sapiens OX=9606 GN=GTPBP4 PE=2 SV=1
69	512091	Q8NF24|Q8NF24_HUMAN	20.85	1	1		90186	FLJ00378 protein (Fragment) OS=Homo sapiens OX=9606 GN=FLJ00378 PE=2 SV=1
35	512095	C9JD41|C9JD41_HUMAN	23.09	1	1		7332	Metabotropic glutamate receptor 2 (Fragment) OS=Homo sapiens OX=9606 GN=GRM2 PE=1 SV=1
72	512106	sp|Q96P63|SPB12_HUMAN	22.3	1	1		46276	Serpin B12 OS=Homo sapiens OX=9606 GN=SERPINB12 PE=1 SV=1
35	512110	D6RC51|D6RC51_HUMAN	23.09	1	1		12455	Serine protease inhibitor Kazal-type 2 OS=Homo sapiens OX=9606 GN=SPINK2 PE=1 SV=1
35	512119	D6RI10|D6RI10_HUMAN	23.09	1	1		13891	Serine protease inhibitor Kazal-type 2 OS=Homo sapiens OX=9606 GN=SPINK2 PE=1 SV=1
35	512329	A0A126GWG4|A0A126GWG4_HUMAN	23.09	1	1		35374	Olfactory receptor OS=Homo sapiens OX=9606 GN=OR2B11 PE=3 SV=1
35	512330	F1B7N2|F1B7N2_HUMAN	23.09	1	1		35678	NADH-ubiquinone oxidoreductase chain 1 OS=Homo sapiens OX=9606 GN=ND1 PE=3 SV=1
35	512331	A3FP01|A3FP01_HUMAN	23.09	1	1		35679	NADH-ubiquinone oxidoreductase chain 1 OS=Homo sapiens OX=9606 GN=ND1 PE=3 SV=1
35	512332	A0A096VZ96|A0A096VZ96_HUMAN	23.09	1	1		35695	NADH-ubiquinone oxidoreductase chain 1 OS=Homo sapiens OX=9606 GN=ND1 PE=3 SV=1
35	512333	A0A1S6LYZ9|A0A1S6LYZ9_HUMAN	23.09	1	1		35563	NADH-ubiquinone oxidoreductase chain 1 OS=Homo sapiens OX=9606 GN=ND1 PE=3 SV=1
35	512334	Q6RRM1|Q6RRM1_HUMAN	23.09	1	1		35661	NADH-ubiquinone oxidoreductase chain 1 OS=Homo sapiens OX=9606 GN=ND1 PE=3 SV=1
35	512349	A0A024R2Y2|A0A024R2Y2_HUMAN	23.09	1	1		38197	Testicular tissue protein Li 201 OS=Homo sapiens OX=9606 GN=TMEM115 PE=2 SV=1
35	512374	sp|Q8TEY5|CR3L4_HUMAN	23.09	1	1		43432	Cyclic AMP-responsive element-binding protein 3-like protein 4 OS=Homo sapiens OX=9606 GN=CREB3L4 PE=1 SV=1
35	512385	B7Z633|B7Z633_HUMAN	23.09	1	1		45715	cDNA FLJ54145 highly similar to Limb region 1 protein homolog OS=Homo sapiens OX=9606 PE=2 SV=1
35	512392	H7BXL3|H7BXL3_HUMAN	23.09	1	1		47797	Metabotropic glutamate receptor 2 OS=Homo sapiens OX=9606 GN=GRM2 PE=1 SV=1
35	512410	A8K4S2|A8K4S2_HUMAN	23.09	1	1		55068	cDNA FLJ76279 highly similar to Homo sapiens limb region 1 homolog (mouse) (LMBR1) mRNA OS=Homo sapiens OX=9606 PE=2 SV=1
35	512425	sp|Q96JT2|S45A3_HUMAN	23.09	1	1		59323	Solute carrier family 45 member 3 OS=Homo sapiens OX=9606 GN=SLC45A3 PE=2 SV=1
35	512432	E9PKG2|E9PKG2_HUMAN	23.09	1	1		64514	Low-density lipoprotein receptor-related protein 8 OS=Homo sapiens OX=9606 GN=LRP8 PE=1 SV=2
35	512433	C9JL63|C9JL63_HUMAN	23.09	1	1		65455	Metabotropic glutamate receptor 2 OS=Homo sapiens OX=9606 GN=GRM2 PE=1 SV=2
35	512465	E9PEE8|E9PEE8_HUMAN	23.09	1	1		81544	Integrin beta OS=Homo sapiens OX=9606 GN=ITGB6 PE=1 SV=1
35	512466	B4E2B8|B4E2B8_HUMAN	23.09	1	1		81522	Integrin beta OS=Homo sapiens OX=9606 PE=2 SV=1
35	512475	A8K2N5|A8K2N5_HUMAN	23.09	1	1		85990	Integrin beta OS=Homo sapiens OX=9606 PE=2 SV=1
35	512476	sp|P18564|ITB6_HUMAN	23.09	1	1		85936	Integrin beta-6 OS=Homo sapiens OX=9606 GN=ITGB6 PE=1 SV=2
35	512480	Q59FR6|Q59FR6_HUMAN	23.09	1	1		86534	Protocadherin beta 5 variant (Fragment) OS=Homo sapiens OX=9606 PE=2 SV=1
35	512482	F5H4Z8|F5H4Z8_HUMAN	23.09	1	1		103252	Thrombospondin-3 OS=Homo sapiens OX=9606 GN=THBS3 PE=1 SV=2
35	512483	Q2HIZ0|Q2HIZ0_HUMAN	23.09	1	1		104173	Thrombospondin 3 OS=Homo sapiens OX=9606 GN=THBS3 PE=2 SV=1
35	512484	Q53FK6|Q53FK6_HUMAN	23.09	1	1		104299	Thrombospondin 3 variant (Fragment) OS=Homo sapiens OX=9606 PE=2 SV=1
35	512522	B4E2D8|B4E2D8_HUMAN	23.09	1	1		112497	cDNA FLJ59655 highly similar to Protocadherin-1 OS=Homo sapiens OX=9606 PE=2 SV=1
35	512535	A0A067XG54|A0A067XG54_HUMAN	23.09	1	1		127681	Phospholipid-transporting ATPase OS=Homo sapiens OX=9606 GN=ATP11C PE=1 SV=1
35	512637	A0A024R8K7|A0A024R8K7_HUMAN	23.09	1	1		195012	Integrin beta OS=Homo sapiens OX=9606 GN=ITGB4 PE=3 SV=1
54	512894	A0A0A0MR25|A0A0A0MR25_HUMAN	27.05	1	1		92071	Fibroblast growth factor receptor OS=Homo sapiens OX=9606 GN=FGFR2 PE=1 SV=1
54	512914	D3DRD5|D3DRD5_HUMAN	27.05	1	1		93817	Fibroblast growth factor receptor OS=Homo sapiens OX=9606 GN=FGFR2 PE=3 SV=1
55	513113	U3KPX6|U3KPX6_HUMAN	20.53	1	1	Oxidation (M)	9669	Zinc finger E-box-binding homeobox 2 OS=Homo sapiens OX=9606 GN=ZEB2 PE=4 SV=1
55	513144	E7ESP8|E7ESP8_HUMAN	20.53	1	1	Oxidation (M)	52111	Zinc finger E-box-binding homeobox 2 (Fragment) OS=Homo sapiens OX=9606 GN=ZEB2 PE=1 SV=2
55	513157	E7EUW9|E7EUW9_HUMAN	20.53	1	1	Oxidation (M)	81912	Zinc finger E-box-binding homeobox 2 (Fragment) OS=Homo sapiens OX=9606 GN=ZEB2 PE=1 SV=2
43	501231	S6B2A6|S6B2A6_HUMAN	60.04	1	1	Carbamidomethylation	32167	IgG H chain OS=Homo sapiens OX=9606 PE=2 SV=1
43	501232	S6C4Q7|S6C4Q7_HUMAN	60.04	1	1	Carbamidomethylation	32421	IgG H chain OS=Homo sapiens OX=9606 PE=2 SV=1
43	501233	S6BGE5|S6BGE5_HUMAN	60.04	1	1	Carbamidomethylation	34058	IgG H chain OS=Homo sapiens OX=9606 PE=2 SV=1
43	501234	S6BAN1|S6BAN1_HUMAN	60.04	1	1	Carbamidomethylation	33738	IgG H chain OS=Homo sapiens OX=9606 PE=2 SV=1
43	501235	A0A0A0MS08|A0A0A0MS08_HUMAN	60.04	1	1	Carbamidomethylation	43912	Immunoglobulin heavy constant gamma 1 (Fragment) OS=Homo sapiens OX=9606 GN=IGHG1 PE=1 SV=1
35	496325	A0A087WVP1|A0A087WVP1_HUMAN	23.09	1	1		506385	Protocadherin Fat 1 OS=Homo sapiens OX=9606 GN=FAT1 PE=1 SV=1
35	493637	A6MW40|A6MW40_HUMAN	23.09	1	1		255685	PKDREJ (Fragment) OS=Homo sapiens OX=9606 PE=3 SV=1
35	492680	B0AZM5|B0AZM5_HUMAN	23.09	1	1		95584	cDNA FLJ79465 highly similar to Metabotropic glutamate receptor 2 OS=Homo sapiens OX=9606 PE=2 SV=1
35	492681	A8K1R9|A8K1R9_HUMAN	23.09	1	1		95538	cDNA FLJ78161 highly similar to Homo sapiens glutamate receptor metabotropic 2 (GRM2) mRNA OS=Homo sapiens OX=9606 PE=2 SV=1
35	492692	Q59GE5|Q59GE5_HUMAN	23.09	1	1		117476	Glutamate receptor homolog (Fragment) OS=Homo sapiens OX=9606 PE=3 SV=1
35	493091	A0A0A0MRH9|A0A0A0MRH9_HUMAN	23.09	1	1		143843	Astrotactin-2 OS=Homo sapiens OX=9606 GN=ASTN2 PE=1 SV=1
7	491858	A0A1X8XL64|A0A1X8XL64_HUMAN	48.06	3	3	Mutation	15507	Histone H3 OS=Homo sapiens OX=9606 GN=H3F3AP6 PE=1 SV=1
20	427722	tr|D6RHE1|D6RHE1_HUMAN	20.41	1	1	Carbamidomethylation	434157	Ankyrin-2 OS=Homo sapiens OX=9606 GN=ANK2 PE=1 SV=2
24	428088	sp|Q9BYW2|SETD2_HUMAN	20.28	1	1		287595	Histone-lysine N-methyltransferase SETD2 OS=Homo sapiens OX=9606 GN=SETD2 PE=1 SV=3
62	428553	sp|Q86YZ3|HORN_HUMAN	22.18	1	1		282389	Hornerin OS=Homo sapiens OX=9606 GN=HRNR PE=1 SV=2
30	428599	sp|P82987|ATL3_HUMAN	26.04	1	1		188691	ADAMTS-like protein 3 OS=Homo sapiens OX=9606 GN=ADAMTSL3 PE=1 SV=4
64	428687	sp|Q8N398|VW5B2_HUMAN	22.89	1	1		131668	von Willebrand factor A domain-containing protein 5B2 OS=Homo sapiens OX=9606 GN=VWA5B2 PE=2 SV=3
37	432830	sp|Q8N4L1|T151A_HUMAN	29.67	1	1		51278	Transmembrane protein 151A OS=Homo sapiens OX=9606 GN=TMEM151A PE=2 SV=1
64	432832	tr|A0A0A0MQX1|A0A0A0MQX1_HUMAN	27.1	2	2	Oxidation (M)	238515	Unconventional myosin-X OS=Homo sapiens OX=9606 GN=MYO10 PE=1 SV=1
15	432841	sp|P07477|TRY1_HUMAN	21.65	1	1	Mutation	26558	Trypsin-1 OS=Homo sapiens OX=9606 GN=PRSS1 PE=1 SV=1
15	432844	sp|Q8NHM4|TRY6_HUMAN	21.65	1	1	Mutation	26537	Putative trypsin-6 OS=Homo sapiens OX=9606 GN=PRSS3P2 PE=5 SV=2
38	432861	sp|P20936|RASA1_HUMAN	26.29	1	1		116403	Ras GTPase-activating protein 1 OS=Homo sapiens OX=9606 GN=RASA1 PE=1 SV=1
108	432867	sp|Q86V59|PNM8A_HUMAN	24.5	2	1		48161	Paraneoplastic antigen-like protein 8A OS=Homo sapiens OX=9606 GN=PNMA8A PE=1 SV=2
26	432900	tr|A0A5F9ZGZ0|A0A5F9ZGZ0_HUMAN	25.46	1	1		74439	Uncharacterized protein OS=Homo sapiens OX=9606 PE=4 SV=1
43	432905	tr|Q5TCT4|Q5TCT4_HUMAN	21.53	1	1		24079	RNA-binding protein 34 (Fragment) OS=Homo sapiens OX=9606 GN=RBM34 PE=1 SV=1
43	432911	sp|P42696|RBM34_HUMAN	21.53	1	1		48565	RNA-binding protein 34 OS=Homo sapiens OX=9606 GN=RBM34 PE=1 SV=2
23	432917	sp|Q8TEJ3|SH3R3_HUMAN	21.62	1	1		92776	E3 ubiquitin-protein ligase SH3RF3 OS=Homo sapiens OX=9606 GN=SH3RF3 PE=1 SV=2
42	432919	tr|A0A0C4DGH3|A0A0C4DGH3_HUMAN	30.53	2	2		60813	Numb-like protein OS=Homo sapiens OX=9606 GN=NUMBL PE=1 SV=1
30	433192	sp|Q9UHJ3|SMBT1_HUMAN	20.22	1	1		98141	Scm-like with four MBT domains protein 1 OS=Homo sapiens OX=9606 GN=SFMBT1 PE=1 SV=2
26	433219	sp|Q9UPW8|UN13A_HUMAN	25.46	1	1		193013	Protein unc-13 homolog A OS=Homo sapiens OX=9606 GN=UNC13A PE=2 SV=4
16	433295	sp|Q9BTY7|HGH1_HUMAN	23.42	1	1		42129	Protein HGH1 homolog OS=Homo sapiens OX=9606 GN=HGH1 PE=1 SV=1
16	433336	tr|E7ESP2|E7ESP2_HUMAN	23.42	1	1		50355	Cyclin-dependent kinase 11A OS=Homo sapiens OX=9606 GN=CDK11A PE=1 SV=1
16	433358	tr|I3L2X7|I3L2X7_HUMAN	23.42	1	1		62015	Centrosomal protein of 131 kDa (Fragment) OS=Homo sapiens OX=9606 GN=CEP131 PE=1 SV=1
16	433367	sp|Q9NPF5|DMAP1_HUMAN	23.42	1	1		52993	DNA methyltransferase 1-associated protein 1 OS=Homo sapiens OX=9606 GN=DMAP1 PE=1 SV=1
16	433553	tr|A0A0D9SEI3|A0A0D9SEI3_HUMAN	23.42	1	1		89438	Cyclin-dependent kinase 11B OS=Homo sapiens OX=9606 GN=CDK11B PE=1 SV=1
16	433556	tr|Q5QPR3|Q5QPR3_HUMAN	23.42	1	1		91007	Cyclin-dependent kinase 11A OS=Homo sapiens OX=9606 GN=CDK11A PE=1 SV=1
16	433558	tr|A0A0D9SER5|A0A0D9SER5_HUMAN	23.42	1	1		90232	Cyclin-dependent kinase 11B OS=Homo sapiens OX=9606 GN=CDK11B PE=1 SV=1
16	433559	sp|Q9UQ88|CD11A_HUMAN	23.42	1	1		91362	Cyclin-dependent kinase 11A OS=Homo sapiens OX=9606 GN=CDK11A PE=1 SV=4
16	433560	tr|A0A0D9SEN2|A0A0D9SEN2_HUMAN	23.42	1	1		90626	Cyclin-dependent kinase 11B OS=Homo sapiens OX=9606 GN=CDK11B PE=1 SV=1
16	433566	sp|P21127|CD11B_HUMAN	23.42	1	1		92620	Cyclin-dependent kinase 11B OS=Homo sapiens OX=9606 GN=CDK11B PE=1 SV=4
16	434099	tr|A0A2R8YFZ7|A0A2R8YFZ7_HUMAN	23.42	1	1		193615	Cytoplasmic dynein 1 heavy chain 1 (Fragment) OS=Homo sapiens OX=9606 GN=DYNC1H1 PE=1 SV=1
35	439112	sp|Q14416|GRM2_HUMAN	23.09	1	1		95568	Metabotropic glutamate receptor 2 OS=Homo sapiens OX=9606 GN=GRM2 PE=1 SV=2
169	439429	sp|O14924|RGS12_HUMAN	26.46	2	2		156357	Regulator of G-protein signaling 12 OS=Homo sapiens OX=9606 GN=RGS12 PE=1 SV=1
29	439457	sp|Q5SV97|PERM1_HUMAN	25.65	1	1		81351	PGC-1 and ERR-induced regulator in muscle protein 1 OS=Homo sapiens OX=9606 GN=PERM1 PE=2 SV=4
38	439721	tr|J3KPH2|J3KPH2_HUMAN	22.22	1	1		97764	Arachidonate lipoxygenase 3 isoform CRA_a OS=Homo sapiens OX=9606 GN=ALOXE3 PE=1 SV=1
35	439850	sp|Q7Z3F1|GP155_HUMAN	23.09	1	1		96919	Integral membrane protein GPR155 OS=Homo sapiens OX=9606 GN=GPR155 PE=2 SV=2
13	440007	sp|P05109|S10A8_HUMAN	47.32	1	1		10835	Protein S100-A8 OS=Homo sapiens OX=9606 GN=S100A8 PE=1 SV=1
18	441166	sp|Q86U44|MTA70_HUMAN	42.03	1	1		64474	N6-adenosine-methyltransferase catalytic subunit OS=Homo sapiens OX=9606 GN=METTL3 PE=1 SV=2
17	441176	tr|G3V485|G3V485_HUMAN	25.81	1	1		53058	Rho guanine nucleotide exchange factor 40 OS=Homo sapiens OX=9606 GN=ARHGEF40 PE=1 SV=1
46	441180	sp|Q13443|ADAM9_HUMAN	22.06	1	1		90556	Disintegrin and metalloproteinase domain-containing protein 9 OS=Homo sapiens OX=9606 GN=ADAM9 PE=1 SV=1
26	441183	tr|A0A494C0L9|A0A494C0L9_HUMAN	21.34	1	1	Oxidation (M)	57187	Pro-neuregulin-1 membrane-bound isoform OS=Homo sapiens OX=9606 GN=NRG1 PE=1 SV=1
26	441186	tr|A0A494C0K4|A0A494C0K4_HUMAN	21.34	1	1	Oxidation (M)	50686	Pro-neuregulin-1 membrane-bound isoform OS=Homo sapiens OX=9606 GN=NRG1 PE=1 SV=1
69	441275	tr|A0A3B3ITU7|A0A3B3ITU7_HUMAN	20.64	1	1		55109	Fanconi anemia group E protein OS=Homo sapiens OX=9606 GN=FANCE PE=1 SV=1
17	441398	sp|Q9BRQ6|MIC25_HUMAN	23.27	1	1		26458	MICOS complex subunit MIC25 OS=Homo sapiens OX=9606 GN=CHCHD6 PE=1 SV=1
24	441408	sp|O14827|RGRF2_HUMAN	29.3	1	1	Carbamidomethylation	140764	Ras-specific guanine nucleotide-releasing factor 2 OS=Homo sapiens OX=9606 GN=RASGRF2 PE=1 SV=2
42	441441	sp|P51816|AFF2_HUMAN	20.15	1	1		144770	AF4/FMR2 family member 2 OS=Homo sapiens OX=9606 GN=AFF2 PE=1 SV=4
35	441648	sp|Q06418|TYRO3_HUMAN	23.09	1	1		96905	Tyrosine-protein kinase receptor TYRO3 OS=Homo sapiens OX=9606 GN=TYRO3 PE=1 SV=1
35	446972	sp|O75298|RTN2_HUMAN	23.09	1	1		59264	Reticulon-2 OS=Homo sapiens OX=9606 GN=RTN2 PE=1 SV=1
35	447709	sp|P49746|TSP3_HUMAN	23.09	1	1		104201	Thrombospondin-3 OS=Homo sapiens OX=9606 GN=THBS3 PE=1 SV=1
69	459193	sp|Q9HB96|FANCE_HUMAN	20.64	1	1		58711	Fanconi anemia group E protein OS=Homo sapiens OX=9606 GN=FANCE PE=1 SV=1
20	466606	sp|P07585|PGS2_HUMAN	32.02	1	1		39747	Decorin OS=Homo sapiens OX=9606 GN=DCN PE=1 SV=1
58	466657	sp|Q5TGY1|TMCO4_HUMAN	24.92	1	1		67910	Transmembrane and coiled-coil domain-containing protein 4 OS=Homo sapiens OX=9606 GN=TMCO4 PE=2 SV=1
14	466667	sp|Q16643|DREB_HUMAN	29.16	2	1	Mutation	71429	Drebrin OS=Homo sapiens OX=9606 GN=DBN1 PE=1 SV=4
38	466691	tr|D6RC30|D6RC30_HUMAN	22.22	1	1		28682	Transmembrane protein 232 (Fragment) OS=Homo sapiens OX=9606 GN=TMEM232 PE=4 SV=1
197	466711	sp|Q99708|CTIP_HUMAN	24.9	2	1		101942	DNA endonuclease RBBP8 OS=Homo sapiens OX=9606 GN=RBBP8 PE=1 SV=2
40	466727	sp|P11047|LAMC1_HUMAN	28.12	1	1		177602	Laminin subunit gamma-1 OS=Homo sapiens OX=9606 GN=LAMC1 PE=1 SV=3
38	466741	tr|A0A087WSV4|A0A087WSV4_HUMAN	22.22	1	1		73086	Arf-GAP with GTPase ANK repeat and PH domain-containing protein 4 OS=Homo sapiens OX=9606 GN=AGAP4 PE=4 SV=1
35	466840	sp|Q9Y5E4|PCDB5_HUMAN	23.09	1	1		86423	Protocadherin beta-5 OS=Homo sapiens OX=9606 GN=PCDHB5 PE=2 SV=1
35	466923	sp|Q08174|PCDH1_HUMAN	23.09	1	1		114743	Protocadherin-1 OS=Homo sapiens OX=9606 GN=PCDH1 PE=1 SV=2
47	467196	tr|M0QXA7|M0QXA7_HUMAN	20.37	1	1		103279	Protein Wiz OS=Homo sapiens OX=9606 GN=WIZ PE=1 SV=1
24	467570	tr|H7BXU9|H7BXU9_HUMAN	25.25	1	1		75243	Fibroblast growth factor receptor 2 (Fragment) OS=Homo sapiens OX=9606 GN=FGFR2 PE=1 SV=1
24	467639	sp|P21802|FGFR2_HUMAN	25.25	1	1		92025	Fibroblast growth factor receptor 2 OS=Homo sapiens OX=9606 GN=FGFR2 PE=1 SV=1
51	467689	tr|A0A2R8Y714|A0A2R8Y714_HUMAN	24.09	1	1	Mutation	74191	GRB2-associated-binding protein 4 OS=Homo sapiens OX=9606 GN=GAB4 PE=4 SV=1
24	467748	sp|O14981|BTAF1_HUMAN	25.25	1	1		206886	TATA-binding protein-associated factor 172 OS=Homo sapiens OX=9606 GN=BTAF1 PE=1 SV=2
10	476707	A0A3S6HTB9|A0A3S6HTB9_HUMAN	49.1	3	3	Mutation	1525563	Mucin-16 short isoform OS=Homo sapiens OX=9606 GN=MUC16 PE=2 SV=1
10	476708	A0A3Q8B178|A0A3Q8B178_HUMAN	49.1	3	3	Mutation	1541122	Mucin-16 long isoform OS=Homo sapiens OX=9606 GN=MUC16 PE=2 SV=1
18	477723	A0A0A0MRE3|A0A0A0MRE3_HUMAN	28.53	2	2	Oxidation (M); Carbamidomethylation	788380	Nesprin-2 OS=Homo sapiens OX=9606 GN=SYNE2 PE=1 SV=1
18	477724	D4YW74|D4YW74_HUMAN	28.53	2	2	Oxidation (M); Carbamidomethylation	788544	Polytrophin OS=Homo sapiens OX=9606 GN=TROPH PE=2 SV=1
42	477931	J3KQ26|J3KQ26_HUMAN	22.68	1	1		108067	Armadillo repeat-containing protein 5 OS=Homo sapiens OX=9606 GN=ARMC5 PE=1 SV=1
17	478046	A0A7P0T9R4|A0A7P0T9R4_HUMAN	31.17	2	2		517874	Cytoplasmic dynein 1 heavy chain 1 OS=Homo sapiens OX=9606 GN=DYNC1H1 PE=4 SV=1
14	478519	A0A2Z6ATB6|A0A2Z6ATB6_HUMAN	29.16	2	1	Mutation	76310	Drebrin A OS=Homo sapiens OX=9606 GN=DBN1 PE=2 SV=1
14	481537	E7EQL8|E7EQL8_HUMAN	26.7	1	1		163907	Gamma-tubulin complex component 6 OS=Homo sapiens OX=9606 GN=TUBGCP6 PE=1 SV=1
50	481551	sp|P49916|DNLI3_HUMAN	23.62	1	1		112907	DNA ligase 3 OS=Homo sapiens OX=9606 GN=LIG3 PE=1 SV=2
29	481585	Q8WY77|Q8WY77_HUMAN	25.65	1	1		35127	PP3999 OS=Homo sapiens OX=9606 PE=2 SV=1
48	481741	E9PRY8|E9PRY8_HUMAN	21.64	1	1		76570	Elongation factor 1-delta OS=Homo sapiens OX=9606 GN=EEF1D PE=1 SV=1
66	481760	A0A3B3IRX3|A0A3B3IRX3_HUMAN	22.21	1	1		244016	Mediator of RNA polymerase II transcription subunit 13 OS=Homo sapiens OX=9606 GN=MED13L PE=1 SV=1
134	482206	Q59GD4|Q59GD4_HUMAN	26.52	2	2		162771	Collagen type V alpha 3 preproprotein variant (Fragment) OS=Homo sapiens OX=9606 PE=2 SV=1
17	482524	A0A7P0TAV5|A0A7P0TAV5_HUMAN	31.17	2	2		338225	Cytoplasmic dynein 1 heavy chain 1 OS=Homo sapiens OX=9606 GN=DYNC1H1 PE=4 SV=1
17	482538	A0A7P0T9C4|A0A7P0T9C4_HUMAN	31.17	2	2		535073	Cytoplasmic dynein 1 heavy chain 1 OS=Homo sapiens OX=9606 GN=DYNC1H1 PE=4 SV=1
34	483395	Q59F16|Q59F16_HUMAN	26.49	1	1		96806	Alpha 1 type VII collagen variant (Fragment) OS=Homo sapiens OX=9606 PE=2 SV=1
17	484366	A0A2R8YFZ7|A0A2R8YFZ7_HUMAN	31.17	2	2		418629	Cytoplasmic dynein 1 heavy chain 1 OS=Homo sapiens OX=9606 GN=DYNC1H1 PE=1 SV=2
23	484643	B1AKN3|B1AKN3_HUMAN	25.02	1	1	Carbamidomethylation	141540	Arginine-glutamic acid dipeptide (RE) repeats isoform CRA_b OS=Homo sapiens OX=9606 GN=RERE PE=1 SV=1
30	484997	C9JG08|C9JG08_HUMAN	26.85	1	1	Oxidation (M)	598505	Uncharacterized protein C2orf16 OS=Homo sapiens OX=9606 GN=C2orf16 PE=1 SV=2
7	485153	A8K2H9|A8K2H9_HUMAN	82.59	4	4	Oxidation (M); Carbamidomethylation	49517	cDNA FLJ78503 highly similar to Homo sapiens keratin 13 (KRT13) transcript variant 1 mRNA OS=Homo sapiens OX=9606 PE=2 SV=1
35	485175	A8K0E7|A8K0E7_HUMAN	23.09	1	1		114676	cDNA FLJ77464 highly similar to Homo sapiens protocadherin 1 (cadherin-like 1) (PCDH1) transcript variant 1 mRNA OS=Homo sapiens OX=9606 PE=2 SV=1
46	485325	A0A7I2V2Z6|A0A7I2V2Z6_HUMAN	22.06	1	1		86384	Disintegrin and metalloproteinase domain-containing protein 9 OS=Homo sapiens OX=9606 GN=ADAM9 PE=1 SV=1
46	485326	A0A7I2V4B3|A0A7I2V4B3_HUMAN	22.06	1	1		94063	Disintegrin and metalloproteinase domain-containing protein 9 OS=Homo sapiens OX=9606 GN=ADAM9 PE=1 SV=1
14	486233	Q562R8|Q562R8_HUMAN	47.18	1	1		11536	Actin-like protein (Fragment) OS=Homo sapiens OX=9606 GN=ACT PE=4 SV=1
14	486234	Q562L5|Q562L5_HUMAN	47.18	1	1		11525	Actin-like protein (Fragment) OS=Homo sapiens OX=9606 GN=ACT PE=4 SV=1
14	486235	Q562Z7|Q562Z7_HUMAN	47.18	1	1		11537	Actin-like protein (Fragment) OS=Homo sapiens OX=9606 GN=ACT PE=4 SV=1
14	486236	Q562X9|Q562X9_HUMAN	47.18	1	1		11521	Actin-like protein (Fragment) OS=Homo sapiens OX=9606 GN=ACT PE=4 SV=1
14	486237	Q562N6|Q562N6_HUMAN	47.18	1	1		11520	Actin-like protein (Fragment) OS=Homo sapiens OX=9606 GN=ACT PE=4 SV=1
14	486238	Q562S0|Q562S0_HUMAN	47.18	1	1		11518	Actin-like protein (Fragment) OS=Homo sapiens OX=9606 GN=ACT PE=4 SV=1
14	486239	Q562L9|Q562L9_HUMAN	47.18	1	1		11556	Actin-like protein (Fragment) OS=Homo sapiens OX=9606 GN=ACT PE=4 SV=1
14	486240	Q562N4|Q562N4_HUMAN	47.18	1	1		11812	Actin-like protein (Fragment) OS=Homo sapiens OX=9606 GN=ACT PE=4 SV=1
14	486241	Q562L6|Q562L6_HUMAN	47.18	1	1		11544	Actin-like protein (Fragment) OS=Homo sapiens OX=9606 GN=ACT PE=4 SV=1
14	486242	A0A6Q8PFE4|A0A6Q8PFE4_HUMAN	47.18	1	1		37341	Actin cytoplasmic 1 OS=Homo sapiens OX=9606 GN=ACTB PE=1 SV=1
36	486270	Q5ZEY3|Q5ZEY3_HUMAN	35.31	1	1		9201	Glyceraldehyde-3-phosphate dehydrogenase (Fragment) OS=Homo sapiens OX=9606 GN=GAPD PE=2 SV=1
36	486271	A4UCT1|A4UCT1_HUMAN	35.31	1	1		17303	Glyceraldehyde 3-phosphate dehydrogenase (Fragment) OS=Homo sapiens OX=9606 PE=2 SV=1
36	486272	Q0QET7|Q0QET7_HUMAN	35.31	1	1		24620	Glyceraldehyde-3-phosphate dehydrogenase (Fragment) OS=Homo sapiens OX=9606 GN=GAPDH PE=2 SV=1
36	486273	E7EUT5|E7EUT5_HUMAN	35.31	1	1		27871	Glyceraldehyde-3-phosphate dehydrogenase OS=Homo sapiens OX=9606 GN=GAPDH PE=1 SV=1
101	486318	B7ZBM8|B7ZBM8_HUMAN	26.34	2	1		24955	Syntaxin-16 (Fragment) OS=Homo sapiens OX=9606 GN=STX16 PE=1 SV=1
81	486319	B7Z3D4|B7Z3D4_HUMAN	24.62	2	2	Oxidation (M)	163567	cDNA FLJ59307 highly similar to Myosin-10 OS=Homo sapiens OX=9606 PE=2 SV=1
27	486355	B1AKD8|B1AKD8_HUMAN	21.98	1	1		149183	Rootletin (Fragment) OS=Homo sapiens OX=9606 GN=CROCC PE=1 SV=2
111	486359	A0A024R338|A0A024R338_HUMAN	26.49	2	2		98141	Scm-like with four mbt domains 1 isoform CRA_b OS=Homo sapiens OX=9606 GN=SFMBT1 PE=4 SV=1
41	486360	Q5TCT4|Q5TCT4_HUMAN	23.96	1	1		24079	RNA-binding protein 34 (Fragment) OS=Homo sapiens OX=9606 GN=RBM34 PE=1 SV=1
41	486361	A2A2V2|A2A2V2_HUMAN	23.96	1	1		45918	RNA-binding protein 34 (Fragment) OS=Homo sapiens OX=9606 GN=RBM34 PE=1 SV=1
41	486362	A0A384NL74|A0A384NL74_HUMAN	23.96	1	1		48063	Epididymis secretory sperm binding protein OS=Homo sapiens OX=9606 PE=2 SV=1
43	486364	Q59GK3|Q59GK3_HUMAN	22.59	1	1		95932	RAS p21 protein activator 1 isoform 1 variant (Fragment) OS=Homo sapiens OX=9606 PE=2 SV=1
43	486365	E9PGC0|E9PGC0_HUMAN	22.59	1	1		101790	Ras GTPase-activating protein 1 OS=Homo sapiens OX=9606 GN=RASA1 PE=1 SV=1
43	486366	A0A024RAL2|A0A024RAL2_HUMAN	22.59	1	1		116391	RAS p21 protein activator (GTPase activating protein) 1 isoform CRA_b OS=Homo sapiens OX=9606 GN=RASA1 PE=4 SV=1
52	486399	B4DDG2|B4DDG2_HUMAN	20.23	1	1		40229	Serine/threonine-protein kinase ULK3 OS=Homo sapiens OX=9606 PE=2 SV=1
51	486527	Q6NUK0|Q6NUK0_HUMAN	23.49	1	1		32949	PRDM4 protein OS=Homo sapiens OX=9606 GN=PRDM4 PE=2 SV=1
51	486528	F8VZQ2|F8VZQ2_HUMAN	23.49	1	1		32890	PR domain zinc finger protein 4 OS=Homo sapiens OX=9606 GN=PRDM4 PE=1 SV=1
30	486666	A8K521|A8K521_HUMAN	26.04	1	1		82270	DNA helicase OS=Homo sapiens OX=9606 PE=2 SV=1
16	486741	F8VZR6|F8VZR6_HUMAN	43.07	2	2	Carbamidomethylation	8675	Keratin type II cytoskeletal 4 OS=Homo sapiens OX=9606 GN=KRT4 PE=1 SV=1
16	486744	B4DRW1|B4DRW1_HUMAN	43.07	2	2	Carbamidomethylation	51759	cDNA FLJ55805 highly similar to Keratin type II cytoskeletal 4 OS=Homo sapiens OX=9606 PE=2 SV=1
16	486745	B4DKJ0|B4DKJ0_HUMAN	43.07	2	2	Carbamidomethylation	55292	cDNA FLJ58539 highly similar to Keratin type II cytoskeletal 4 OS=Homo sapiens OX=9606 PE=2 SV=1
30	486814	A0A0G2JHC2|A0A0G2JHC2_HUMAN	26.04	1	1		68042	PPP1R18 OS=Homo sapiens OX=9606 GN=PPP1R18 PE=1 SV=1
30	486869	Q9BZ74|Q9BZ74_HUMAN	26.04	1	1		70013	FKSG42 OS=Homo sapiens OX=9606 GN=FKSG42 PE=2 SV=1
30	486879	B2RE34|B2RE34_HUMAN	26.04	1	1		70969	cDNA FLJ96901 highly similar to Homo sapiens Rac GTPase activating protein 1 (RACGAP1) mRNA OS=Homo sapiens OX=9606 PE=2 SV=1
54	487010	A0A669KBE4|A0A669KBE4_HUMAN	28.38	1	1	Mutation	51670	Ubiquilin-like protein OS=Homo sapiens OX=9606 GN=UBQLNL PE=1 SV=1
17	487093	A0A7P0TA13|A0A7P0TA13_HUMAN	31.17	2	2		531098	Cytoplasmic dynein 1 heavy chain 1 OS=Homo sapiens OX=9606 GN=DYNC1H1 PE=4 SV=1
30	487406	A0A0A0MR87|A0A0A0MR87_HUMAN	26.04	1	1		137830	SCL-interrupting locus protein OS=Homo sapiens OX=9606 GN=STIL PE=1 SV=1
30	487438	B7ZLW5|B7ZLW5_HUMAN	26.04	1	1		141116	STIL protein OS=Homo sapiens OX=9606 GN=STIL PE=2 SV=1
30	487439	E9PSF2|E9PSF2_HUMAN	26.04	1	1		141069	SCL-interrupting locus protein OS=Homo sapiens OX=9606 GN=STIL PE=1 SV=1
20	488452	Q6GMX4|Q6GMX4_HUMAN	41.39	1	1	Carbamidomethylation	24810	IGL@ protein OS=Homo sapiens OX=9606 GN=IGL@ PE=1 SV=1
27	488476	K7EQQ3|K7EQQ3_HUMAN	29.75	2	2		39528	Keratin type I cytoskeletal 9 OS=Homo sapiens OX=9606 GN=KRT9 PE=1 SV=1
21	488485	Q0KKI6|Q0KKI6_HUMAN	25.17	1	1	Carbamidomethylation	24030	Immunoblobulin light chain (Fragment) OS=Homo sapiens OX=9606 PE=1 SV=1
21	488486	Q8TCD0|Q8TCD0_HUMAN	25.17	1	1	Carbamidomethylation	26235	Uncharacterized protein OS=Homo sapiens OX=9606 PE=1 SV=1
46	488523	A0A7I2YQ97|A0A7I2YQ97_HUMAN	22.06	1	1		77925	Disintegrin and metalloproteinase domain-containing protein 9 OS=Homo sapiens OX=9606 GN=ADAM9 PE=1 SV=1
46	488524	A0AVL1|A0AVL1_HUMAN	22.06	1	1		78539	ADAM9 protein OS=Homo sapiens OX=9606 GN=ADAM9 PE=1 SV=1
46	488525	A0A7I2V5N8|A0A7I2V5N8_HUMAN	22.06	1	1		83622	Disintegrin and metalloproteinase domain-containing protein 9 OS=Homo sapiens OX=9606 GN=ADAM9 PE=1 SV=1
49	488528	A0A494C0L9|A0A494C0L9_HUMAN	21.39	1	1	Oxidation (M)	57187	Pro-neuregulin-1 membrane-bound isoform OS=Homo sapiens OX=9606 GN=NRG1 PE=1 SV=1
50	488530	F6KPG5|F6KPG5_HUMAN	21.06	1	1		66531	Albumin (Fragment) OS=Homo sapiens OX=9606 PE=2 SV=1
22	488537	Q6ZP81|Q6ZP81_HUMAN	20.18	1	1		32567	cDNA FLJ26346 fis clone HRT04038 highly similar to Homo sapiens titin (TTN) transcript variant N2-B OS=Homo sapiens OX=9606 PE=2 SV=1
53	488538	J9SY82|J9SY82_HUMAN	20.14	1	1		31441	FKHR-PAX3 fusion protein isoform d OS=Homo sapiens OX=9606 PE=2 SV=1
56	488560	sp|Q8TDW0|LRC8C_HUMAN	20.07	1	1		92449	Volume-regulated anion channel subunit LRRC8C OS=Homo sapiens OX=9606 GN=LRRC8C PE=1 SV=2
35	488592	Q6AI35|Q6AI35_HUMAN	37.27	2	2		128623	Uncharacterized protein DKFZp686F2450 (Fragment) OS=Homo sapiens OX=9606 GN=DKFZp686F2450 PE=2 SV=1
35	488596	H0Y4U7|H0Y4U7_HUMAN	37.27	2	2		179969	ATP-binding cassette sub-family A member 9 OS=Homo sapiens OX=9606 GN=ABCA9 PE=1 SV=2
43	488605	A0A5J6KJ24|A0A5J6KJ24_HUMAN	60.04	1	1	Carbamidomethylation	38388	IGHG3 (Fragment) OS=Homo sapiens OX=9606 PE=2 SV=1
43	488607	A0A286YES1|A0A286YES1_HUMAN	60.04	1	1	Carbamidomethylation	49141	Immunoglobulin heavy constant gamma 3 (Fragment) OS=Homo sapiens OX=9606 GN=IGHG3 PE=1 SV=1
17	488638	A0A7P0T7V5|A0A7P0T7V5_HUMAN	37.1	3	2		505972	Cytoplasmic dynein 1 heavy chain 1 OS=Homo sapiens OX=9606 GN=DYNC1H1 PE=4 SV=1
24	488719	Q59FG2|Q59FG2_HUMAN	29.3	1	1	Carbamidomethylation	262018	Low density lipoprotein-related protein 1 variant (Fragment) OS=Homo sapiens OX=9606 PE=2 SV=1
17	488792	J3QTA6|J3QTA6_HUMAN	23.27	1	1		28817	MICOS complex subunit MIC25 OS=Homo sapiens OX=9606 GN=CHCHD6 PE=1 SV=1
17	488976	sp|O15213|WDR46_HUMAN	23.27	1	1		68071	WD repeat-containing protein 46 OS=Homo sapiens OX=9606 GN=WDR46 PE=1 SV=3
35	489269	Q59FM9|Q59FM9_HUMAN	23.09	1	1		102909	Receptor protein-tyrosine kinase (Fragment) OS=Homo sapiens OX=9606 PE=3 SV=1
17	489281	E9PKC0|E9PKC0_HUMAN	23.27	1	1		144424	Pleckstrin homology domain-containing family A member 7 OS=Homo sapiens OX=9606 GN=PLEKHA7 PE=1 SV=1
24	489294	D6RAS9|D6RAS9_HUMAN	29.3	1	1	Carbamidomethylation	130697	Ras-specific guanine nucleotide-releasing factor 2 OS=Homo sapiens OX=9606 GN=RASGRF2 PE=1 SV=1
24	489296	A0A2X0SFL3|A0A2X0SFL3_HUMAN	29.3	1	1	Carbamidomethylation	140764	RASGRF2 (Fragment) OS=Homo sapiens OX=9606 GN=RASGRF2 PE=4 SV=1
37	489378	sp|Q9UBL6|CPNE7_HUMAN	22.3	1	1	Mutation	70294	Copine-7 OS=Homo sapiens OX=9606 GN=CPNE7 PE=1 SV=1
18	489383	F5H6D8|F5H6D8_HUMAN	42.03	1	1		26266	N6-adenosine-methyltransferase catalytic subunit OS=Homo sapiens OX=9606 GN=METTL3 PE=1 SV=1
18	489384	B4DTN4|B4DTN4_HUMAN	42.03	1	1		27602	N6-adenosine-methyltransferase catalytic subunit OS=Homo sapiens OX=9606 GN=METTL3 PE=1 SV=1
18	489385	B4E2F6|B4E2F6_HUMAN	42.03	1	1		33149	cDNA FLJ61069 highly similar to N6-adenosine-methyltransferase 70 kDa subunit OS=Homo sapiens OX=9606 PE=2 SV=1
17	489405	A0A2R8Y4H4|A0A2R8Y4H4_HUMAN	23.27	1	1		171468	Leucine-rich repeat-containing protein 9 OS=Homo sapiens OX=9606 GN=LRRC9 PE=4 SV=1
19	489598	A0A2R8YFV2|A0A2R8YFV2_HUMAN	24.16	1	1		183743	Protein Wiz OS=Homo sapiens OX=9606 GN=WIZ PE=1 SV=1
19	489599	A0A669KAV7|A0A669KAV7_HUMAN	24.16	1	1		203532	Protein Wiz OS=Homo sapiens OX=9606 GN=WIZ PE=1 SV=1
77	5188	tr|Q5D6A5|Q5D6A5_HUMAN	56.06	1	1		5817	Mutant GSTP1 OS=Homo sapiens GN=GSTP1 PE=4 SV=1
24	51646	sp|Q07954|LRP1_HUMAN	37.12	2	2	Carbamidomethylation	504610	Prolow-density lipoprotein receptor-related protein 1 OS=Homo sapiens OX=9606 GN=LRP1 PE=1 SV=2
40	56460	P13942|COBA2_HUMAN	32.48	2	2		171790	Collagen alpha-2(XI) chain OS=Homo sapiens OX=9606 GN=COL11A2 PE=1 SV=5
44	69060	tr|H0Y3M9|H0Y3M9_HUMAN	27.91	1	1		165276	Collagen alpha-2(XI) chain OS=Homo sapiens GN=COL11A2 PE=4 SV=1
17	482537	A0A2R8Y706|A0A2R8Y706_HUMAN	31.17	2	2		526943	Cytoplasmic dynein 1 heavy chain 1 OS=Homo sapiens OX=9606 GN=DYNC1H1 PE=1 SV=2

## Sheet: unique SCC
Protein Group	Protein ID	Accession	-10lgP	#Peptides	#Unique	PTM	Avg. Mass	Description
19	23	tr|B2RBS8|B2RBS8_HUMAN	29.62	1	1	Carbamidomethylation	69393	cDNA FLJ95666 highly similar to Homo sapiens albumin (ALB) mRNA OS=Homo sapiens PE=2 SV=1
3	24	tr|Q56G89|Q56G89_HUMAN	117.99	11	11	Carbamidomethylation; Oxidation (M); Mutation	69084	Serum albumin OS=Homo sapiens PE=2 SV=1
2	49	tr|B3KWQ3|B3KWQ3_HUMAN	187.3	15	1	Oxidation (M)	28211	cDNA FLJ43573 fis clone RECTM2001691 highly similar to Actin cytoplasmic 2 OS=Homo sapiens PE=2 SV=1
19	52	tr|Q8IUK7|Q8IUK7_HUMAN	29.62	1	1	Carbamidomethylation	45160	ALB protein OS=Homo sapiens PE=2 SV=1
19	58	tr|B4DPR2|B4DPR2_HUMAN	20.94	1	1	Carbamidomethylation	59574	cDNA FLJ50830 highly similar to Serum albumin OS=Homo sapiens PE=2 SV=1
11	60	tr|C9JFL5|C9JFL5_HUMAN	98.75	4	2		16271	Actin gamma-enteric smooth muscle (Fragment) OS=Homo sapiens GN=ACTG2 PE=2 SV=1
53	71	tr|B7ZLF0|B7ZLF0_HUMAN	21.55	1	1		239619	Fibronectin 1 OS=Homo sapiens GN=FN1 PE=2 SV=1
53	73	tr|F8W7G7|F8W7G7_HUMAN	21.55	1	1		243233	Ugl-Y3 OS=Homo sapiens GN=FN1 PE=2 SV=1
53	74	tr|B7ZLE5|B7ZLE5_HUMAN	21.55	1	1		246696	FN1 protein OS=Homo sapiens GN=FN1 PE=2 SV=1
53	75	tr|E9PE77|E9PE77_HUMAN	21.55	1	1		256499	Ugl-Y3 OS=Homo sapiens GN=FN1 PE=2 SV=1
53	76	P02751|FINC_HUMAN	21.55	1	1		262622	Fibronectin OS=Homo sapiens GN=FN1 PE=1 SV=4
23	78	P16403|H12_HUMAN	48.27	2	2		21365	Histone H1.2 OS=Homo sapiens GN=HIST1H1C PE=1 SV=2
23	81	tr|A3R0T8|A3R0T8_HUMAN	48.27	2	2		21865	Histone 1 H1e OS=Homo sapiens GN=HIST1H1E PE=2 SV=1
23	83	tr|Q4VB24|Q4VB24_HUMAN	48.27	2	2		21893	Histone cluster 1 H1e OS=Homo sapiens GN=HIST1H1E PE=2 SV=1
24	84	P16402|H13_HUMAN	63.98	2	2		22350	Histone H1.3 OS=Homo sapiens GN=HIST1H1D PE=1 SV=2
11	93	tr|H7C013|H7C013_HUMAN	79.76	5	1		22859	Serum albumin (Fragment) OS=Homo sapiens GN=ALB PE=4 SV=1
21	124	tr|C9JTX5|C9JTX5_HUMAN	48.71	1	1		8534	Actin cytoplasmic 1 (Fragment) OS=Homo sapiens GN=ACTB PE=2 SV=1
11	141	Q562R1|ACTBL_HUMAN	112.59	8	1	Oxidation (M)	42003	Beta-actin-like protein 2 OS=Homo sapiens GN=ACTBL2 PE=1 SV=2
42	160	tr|Q30191|Q30191_HUMAN	43.14	1	1		37753	HLA-Bw62 antigen (Fragment) OS=Homo sapiens GN=HLA-Bw62.5 PE=2 SV=1
42	164	tr|F4YTD0|F4YTD0_HUMAN	43.14	1	1		40326	MHC class I antigen OS=Homo sapiens GN=HLA-B PE=3 SV=1
42	178	tr|F6IQB9|F6IQB9_HUMAN	43.14	1	1		39310	MHC class I antigen (Fragment) OS=Homo sapiens GN=HLA-C PE=3 SV=1
42	180	tr|F6IQC6|F6IQC6_HUMAN	43.14	1	1		39295	MHC class I antigen (Fragment) OS=Homo sapiens GN=HLA-C PE=3 SV=1
52	199	P00738|HPT_HUMAN	42.48	2	2	Carbamidomethylation	45205	Haptoglobin OS=Homo sapiens GN=HP PE=1 SV=1
69	225	tr|Q1KSF8|Q1KSF8_HUMAN	44.14	1	1		23626	XTP3TPA-transactivated protein 1 OS=Homo sapiens GN=XTP3TPATP1 PE=2 SV=1
69	231	tr|Q9BUU9|Q9BUU9_HUMAN	44.14	1	1		38315	TUBB protein (Fragment) OS=Homo sapiens GN=TUBB PE=2 SV=1
69	233	tr|E7EWR1|E7EWR1_HUMAN	44.14	1	1		39728	Tubulin beta chain OS=Homo sapiens GN=TUBB PE=4 SV=1
69	234	tr|B4E052|B4E052_HUMAN	44.14	1	1		39684	cDNA FLJ52378 highly similar to Tubulin beta-7 chain OS=Homo sapiens PE=2 SV=1
69	237	tr|B3KML9|B3KML9_HUMAN	44.14	1	1		44602	cDNA FLJ11352 fis clone HEMBA1000020 highly similar to Tubulin beta-2C chain OS=Homo sapiens PE=2 SV=1
69	239	tr|F8VUJ7|F8VUJ7_HUMAN	44.14	1	1		46510	Tubulin beta chain OS=Homo sapiens GN=TUBB PE=3 SV=1
69	248	tr|Q8N6N5|Q8N6N5_HUMAN	44.14	1	1		49808	Tubulin beta 2C OS=Homo sapiens GN=TUBB2C PE=2 SV=1
17	262	tr|B3KVF5|B3KVF5_HUMAN	75.71	4	2		49110	cDNA FLJ16494 fis clone CTONG3004576 highly similar to Keratin type I cytoskeletal 15 OS=Homo sapiens PE=2 SV=1
70	281	tr|E2DRY6|E2DRY6_HUMAN	22.95	1	1		36555	Enolase OS=Homo sapiens PE=2 SV=1
23	287	tr|Q9BX83|Q9BX83_HUMAN	73.63	3	3		10710	Hemoglobin alpha 1 globin chain (Fragment) OS=Homo sapiens GN=HBA1 PE=2 SV=1
24	292	P22492|H1T_HUMAN	58.55	2	2		22019	Histone H1t OS=Homo sapiens GN=HIST1H1T PE=2 SV=4
24	293	tr|A1L407|A1L407_HUMAN	58.55	2	2		22033	Histone cluster 1 H1t OS=Homo sapiens GN=HIST1H1T PE=2 SV=1
24	294	Q02539|H11_HUMAN	58.55	2	2		21842	Histone H1.1 OS=Homo sapiens GN=HIST1H1A PE=1 SV=3
42	337	tr|G9HW79|G9HW79_HUMAN	43.14	1	1		21033	MHC class I antigen (Fragment) OS=Homo sapiens GN=HLA-B PE=3 SV=1
42	352	tr|E2D5T5|E2D5T5_HUMAN	43.14	1	1		21249	MHC class I antigen (Fragment) OS=Homo sapiens GN=HLA-C PE=3 SV=1
42	353	tr|F2VP84|F2VP84_HUMAN	43.14	1	1		21065	MHC class I antigen (Fragment) OS=Homo sapiens GN=HLA-C PE=3 SV=1
42	359	tr|E3SG94|E3SG94_HUMAN	43.14	1	1		21215	MHC class I antigen (Fragment) OS=Homo sapiens GN=HLA-B PE=3 SV=1
42	365	tr|G1EQK8|G1EQK8_HUMAN	43.14	1	1		21195	MHC class I antigen (Fragment) OS=Homo sapiens GN=HLA-C PE=3 SV=1
42	367	tr|G9HWB1|G9HWB1_HUMAN	43.14	1	1		21189	MHC class I antigen (Fragment) OS=Homo sapiens GN=HLA-C PE=3 SV=1
42	371	tr|G1EQL7|G1EQL7_HUMAN	43.14	1	1		21203	MHC class I antigen (Fragment) OS=Homo sapiens GN=HLA-C PE=3 SV=1
42	373	tr|G1ENX8|G1ENX8_HUMAN	43.14	1	1		21100	MHC class I antigen (Fragment) OS=Homo sapiens GN=HLA-C PE=3 SV=1
42	374	tr|E5DCQ2|E5DCQ2_HUMAN	43.14	1	1		20809	MHC class I antigen (Fragment) OS=Homo sapiens GN=HLA-C PE=3 SV=1
42	376	tr|D6MLD6|D6MLD6_HUMAN	43.14	1	1		21123	MHC class I antigen (Fragment) OS=Homo sapiens GN=HLA-C PE=3 SV=1
42	377	tr|D6ML87|D6ML87_HUMAN	43.14	1	1		21123	MHC class I antigen (Fragment) OS=Homo sapiens GN=HLA-C PE=3 SV=1
42	381	tr|D7NNZ7|D7NNZ7_HUMAN	43.14	1	1		21142	MHC class I antigen (Fragment) OS=Homo sapiens GN=HLA-C PE=3 SV=1
42	386	tr|G1EQ65|G1EQ65_HUMAN	43.14	1	1		21096	MHC class I antigen (Fragment) OS=Homo sapiens GN=HLA-C PE=3 SV=1
42	402	tr|B2DFH5|B2DFH5_HUMAN	43.14	1	1		31479	MHC class I antigen (Fragment) OS=Homo sapiens GN=HLA-A PE=3 SV=1
42	408	tr|B6ETN7|B6ETN7_HUMAN	43.14	1	1		40716	MHC class I antigen OS=Homo sapiens GN=HLA-A PE=2 SV=1
43	446	tr|Q5FWF9|Q5FWF9_HUMAN	46.16	1	1	Carbamidomethylation	24795	IGL@ protein OS=Homo sapiens GN=IGL@ PE=2 SV=1
68	474	tr|E9PFI5|E9PFI5_HUMAN	25.45	1	1	Oxidation (M)	23747	40S ribosomal protein S3a OS=Homo sapiens GN=RPS3A PE=2 SV=1
85	475	tr|D6RG13|D6RG13_HUMAN	37.43	1	1		25608	40S ribosomal protein S3a (Fragment) OS=Homo sapiens GN=RPS3A PE=2 SV=1
85	477	P61247|RS3A_HUMAN	37.43	1	1		29945	40S ribosomal protein S3a OS=Homo sapiens GN=RPS3A PE=1 SV=2
85	478	tr|A8K4W0|A8K4W0_HUMAN	37.43	1	1		29955	cDNA FLJ78591 highly similar to Homo sapiens ribosomal protein S3A (RPS3A) mRNA OS=Homo sapiens PE=2 SV=1
85	479	tr|Q6NXR8|Q6NXR8_HUMAN	37.43	1	1		29975	Ribosomal protein S3A OS=Homo sapiens GN=RPS3A PE=2 SV=1
85	481	tr|H0Y9Y4|H0Y9Y4_HUMAN	37.43	1	1		23528	40S ribosomal protein S3a (Fragment) OS=Homo sapiens GN=RPS3A PE=4 SV=1
68	483	tr|H0Y8L7|H0Y8L7_HUMAN	25.45	1	1	Oxidation (M)	22137	40S ribosomal protein S3a (Fragment) OS=Homo sapiens GN=RPS3A PE=3 SV=1
65	484	tr|Q5T6W5|Q5T6W5_HUMAN	44.4	2	2		47557	Heterogeneous nuclear ribonucleoprotein K OS=Homo sapiens GN=HNRNPK PE=4 SV=1
10	501	tr|Q86TT2|Q86TT2_HUMAN	50.69	2	2	Carbamidomethylation	39126	Full-length cDNA clone CS0DI019YF20 of Placenta of Homo sapiens (human) (Fragment) OS=Homo sapiens PE=2 SV=1
71	569	tr|Q6LD62|Q6LD62_HUMAN	29.31	1	1		7957	14-3-3 protein/cytosolic phospholipase A2 protein (Fragment) OS=Homo sapiens PE=2 SV=1
130	629	tr|H3BM89|H3BM89_HUMAN	36.93	1	1		37657	60S ribosomal protein L4 OS=Homo sapiens GN=RPL4 PE=4 SV=1
45	635	P36578|RL4_HUMAN	25.96	1	1		47697	60S ribosomal protein L4 OS=Homo sapiens GN=RPL4 PE=1 SV=5
45	636	tr|Q59GY2|Q59GY2_HUMAN	25.96	1	1		48996	Ribosomal protein L4 variant (Fragment) OS=Homo sapiens PE=2 SV=1
72	689	tr|J3QSB4|J3QSB4_HUMAN	36.95	1	1		14692	60S ribosomal protein L13 (Fragment) OS=Homo sapiens GN=RPL13 PE=3 SV=1
72	690	tr|Q6NZ55|Q6NZ55_HUMAN	36.95	1	1		24265	60S ribosomal protein L13 OS=Homo sapiens GN=RPL13 PE=2 SV=1
72	691	P26373|RL13_HUMAN	36.95	1	1		24261	60S ribosomal protein L13 OS=Homo sapiens GN=RPL13 PE=1 SV=4
72	692	tr|A8K4C8|A8K4C8_HUMAN	36.95	1	1		24261	60S ribosomal protein L13 OS=Homo sapiens GN=RPL13 PE=2 SV=1
42	710	tr|G1ENF6|G1ENF6_HUMAN	43.14	1	1		21173	MHC class I antigen (Fragment) OS=Homo sapiens GN=HLA-B PE=3 SV=1
43	714	P07305|H10_HUMAN	39.05	1	1		20863	Histone H1.0 OS=Homo sapiens GN=H1F0 PE=1 SV=3
42	716	tr|E3T0V8|E3T0V8_HUMAN	43.14	1	1		21098	MHC class I antigen (Fragment) OS=Homo sapiens GN=HLA-A PE=3 SV=1
42	719	tr|F8SKV7|F8SKV7_HUMAN	43.14	1	1		20970	MHC class I antigen (Fragment) OS=Homo sapiens GN=HLA-A PE=3 SV=1
42	749	tr|G1EP74|G1EP74_HUMAN	43.14	1	1		20970	MHC class I antigen (Fragment) OS=Homo sapiens GN=HLA-A PE=3 SV=1
42	754	tr|E1U671|E1U671_HUMAN	43.14	1	1		21129	MHC class I antigen (Fragment) OS=Homo sapiens GN=HLA-A PE=2 SV=1
42	775	tr|D6ML51|D6ML51_HUMAN	43.14	1	1		21097	MHC class I antigen (Fragment) OS=Homo sapiens GN=HLA-A PE=3 SV=1
42	779	tr|D6ML03|D6ML03_HUMAN	43.14	1	1		20962	MHC class I antigen (Fragment) OS=Homo sapiens GN=HLA-A PE=3 SV=1
42	780	tr|G1EP40|G1EP40_HUMAN	43.14	1	1		21207	MHC class I antigen (Fragment) OS=Homo sapiens GN=HLA-A PE=3 SV=1
42	786	tr|F4YU12|F4YU12_HUMAN	43.14	1	1		21284	MHC class I antigen (Fragment) OS=Homo sapiens GN=HLA-A PE=3 SV=1
42	798	tr|D7NNS3|D7NNS3_HUMAN	43.14	1	1		21073	MHC class I antigen (Fragment) OS=Homo sapiens GN=HLA-A PE=3 SV=1
42	804	tr|D7GLM1|D7GLM1_HUMAN	43.14	1	1		31650	MHC class I antigen (Fragment) OS=Homo sapiens GN=HLA-A PE=3 SV=1
42	811	tr|F6IQU6|F6IQU6_HUMAN	43.14	1	1		38207	MHC class I antigen (Fragment) OS=Homo sapiens GN=HLA-A PE=2 SV=1
66	818	tr|A8MUD9|A8MUD9_HUMAN	45.51	1	1		24433	60S ribosomal protein L7 OS=Homo sapiens GN=RPL7 PE=3 SV=1
66	819	tr|O95036|O95036_HUMAN	45.51	1	1		29037	Similar to 60S ribosomal protein L7; similar to P18124 (PID:d133021) OS=Homo sapiens GN=WUGSC:H_RG054D04.1 PE=2 SV=1
66	820	P18124|RL7_HUMAN	45.51	1	1		29226	60S ribosomal protein L7 OS=Homo sapiens GN=RPL7 PE=1 SV=1
15	864	tr|Q1ZYQ1|Q1ZYQ1_HUMAN	75.18	2	2		49960	Tubulin alpha 2 OS=Homo sapiens GN=TUBA2 PE=2 SV=1
15	865	Q13748|TBA3C_HUMAN	75.18	2	2		49960	Tubulin alpha-3C/D chain OS=Homo sapiens GN=TUBA3C PE=1 SV=3
15	866	Q6PEY2|TBA3E_HUMAN	75.18	2	2		49859	Tubulin alpha-3E chain OS=Homo sapiens GN=TUBA3E PE=1 SV=2
35	918	tr|E9PP50|E9PP50_HUMAN	39.18	1	1	Acetylation (N-term)	17865	Cofilin-1 (Fragment) OS=Homo sapiens GN=CFL1 PE=2 SV=1
35	919	P23528|COF1_HUMAN	39.18	1	1	Acetylation (N-term)	18502	Cofilin-1 OS=Homo sapiens GN=CFL1 PE=1 SV=3
35	920	tr|E9PK25|E9PK25_HUMAN	39.18	1	1	Acetylation (N-term)	22728	Cofilin-1 OS=Homo sapiens GN=CFL1 PE=2 SV=1
61	921	tr|J3QR09|J3QR09_HUMAN	21.07	1	1		23135	Ribosomal protein L19 OS=Homo sapiens GN=RPL19 PE=3 SV=1
61	922	tr|J3KTE4|J3KTE4_HUMAN	21.07	1	1		23248	Ribosomal protein L19 OS=Homo sapiens GN=RPL19 PE=3 SV=1
43	946	P0CF74|LAC6_HUMAN	36.62	1	1	Carbamidomethylation	11277	Ig lambda-6 chain C region OS=Homo sapiens GN=IGLC6 PE=4 SV=1
9	996	tr|H0YCU9|H0YCU9_HUMAN	63.98	5	5	Oxidation (M)	16852	Transgelin (Fragment) OS=Homo sapiens GN=TAGLN PE=4 SV=1
9	997	tr|Q53GC9|Q53GC9_HUMAN	66.5	5	5	Oxidation (M)	20889	Transgelin variant (Fragment) OS=Homo sapiens PE=2 SV=1
54	1030	tr|I4AY87|I4AY87_HUMAN	22.93	1	1	Carbamidomethylation	12476	Macrophage migration inhibitory factor (Fragment) OS=Homo sapiens PE=2 SV=1
54	1031	P14174|MIF_HUMAN	22.93	1	1	Carbamidomethylation	12476	Macrophage migration inhibitory factor OS=Homo sapiens GN=MIF PE=1 SV=4
79	1053	tr|J3QL05|J3QL05_HUMAN	57.17	1	1		15156	Serine/arginine-rich-splicing factor 2 (Fragment) OS=Homo sapiens GN=SRSF2 PE=4 SV=1
79	1054	tr|J3KP15|J3KP15_HUMAN	57.17	1	1		15527	Serine/arginine-rich-splicing factor 2 (Fragment) OS=Homo sapiens GN=SRSF2 PE=4 SV=1
79	1059	tr|Q8NAK9|Q8NAK9_HUMAN	57.17	1	1		23195	cDNA FLJ35170 fis clone PLACE6012942 highly similar to SPLICING FACTOR ARGININE/SERINE-RICH 2 OS=Homo sapiens PE=2 SV=1
79	1060	tr|B3KUY1|B3KUY1_HUMAN	57.17	1	1		24190	Splicing factor arginine/serine-rich 2 isoform CRA_d OS=Homo sapiens GN=SFRS2 PE=2 SV=1
79	1061	tr|B4DN89|B4DN89_HUMAN	57.17	1	1		24153	Serine/arginine-rich-splicing factor 2 OS=Homo sapiens GN=SFRS2 PE=2 SV=1
79	1062	Q01130|SRSF2_HUMAN	57.17	1	1		25476	Serine/arginine-rich splicing factor 2 OS=Homo sapiens GN=SRSF2 PE=1 SV=4
79	1063	tr|Q53FN0|Q53FN0_HUMAN	57.17	1	1		25502	Splicing factor arginine/serine-rich 2 variant (Fragment) OS=Homo sapiens PE=2 SV=1
14	1097	tr|F8VUG2|F8VUG2_HUMAN	56.87	3	3		30907	Keratin type II cytoskeletal 8 (Fragment) OS=Homo sapiens GN=KRT8 PE=2 SV=1
82	1113	tr|C9JGI3|C9JGI3_HUMAN	48.83	1	1		46087	Thymidine phosphorylase (Fragment) OS=Homo sapiens GN=TYMP PE=2 SV=1
82	1114	P19971|TYPH_HUMAN	48.83	1	1		49956	Thymidine phosphorylase OS=Homo sapiens GN=TYMP PE=1 SV=2
82	1115	tr|E5KRG5|E5KRG5_HUMAN	48.83	1	1		49956	HCG1988078 isoform CRA_a OS=Homo sapiens GN=hCG_1988078 PE=2 SV=1
82	1116	tr|B2RBL3|B2RBL3_HUMAN	48.83	1	1		49923	cDNA FLJ95575 highly similar to Homo sapiens endothelial cell growth factor 1 (platelet-derived) (ECGF1) mRNA OS=Homo sapiens PE=2 SV=1
37	1119	tr|Q147W7|Q147W7_HUMAN	39.44	2	1		37522	KRT1B protein OS=Homo sapiens GN=KRT1B PE=2 SV=1
37	1120	tr|F5GY66|F5GY66_HUMAN	39.44	2	1		37621	Keratin type II cytoskeletal 1b OS=Homo sapiens GN=KRT77 PE=2 SV=1
49	1121	tr|B3KY79|B3KY79_HUMAN	53.4	2	1		49035	cDNA FLJ46620 fis clone TLUNG2000654 highly similar to Keratin type II cytoskeletal 7 OS=Homo sapiens PE=2 SV=1
38	1142	tr|G3V576|G3V576_HUMAN	72.67	2	2		25257	Heterogeneous nuclear ribonucleoproteins C1/C2 OS=Homo sapiens GN=HNRNPC PE=4 SV=1
38	1143	tr|G3V4W0|G3V4W0_HUMAN	72.67	2	2		28916	Heterogeneous nuclear ribonucleoproteins C1/C2 (Fragment) OS=Homo sapiens GN=HNRNPC PE=2 SV=1
38	1144	tr|B4DY08|B4DY08_HUMAN	72.67	2	2		31972	Heterogeneous nuclear ribonucleoproteins C1/C2 OS=Homo sapiens GN=HNRNPC PE=2 SV=1
38	1145	tr|B2R5W2|B2R5W2_HUMAN	72.67	2	2		31948	cDNA FLJ92657 highly similar to Homo sapiens heterogeneous nuclear ribonucleoprotein C (C1/C2) (HNRPC) transcript variant 2 mRNA OS=Homo sapiens PE=2 SV=1
38	1146	tr|G3V4C1|G3V4C1_HUMAN	72.67	2	2		32238	Heterogeneous nuclear ribonucleoproteins C1/C2 OS=Homo sapiens GN=HNRNPC PE=2 SV=1
38	1147	tr|B3KX96|B3KX96_HUMAN	72.67	2	2		32330	cDNA FLJ45003 fis clone BRAWH3011623 highly similar to Heterogeneous nuclear ribonucleoproteins C OS=Homo sapiens PE=2 SV=1
38	1148	tr|B2R603|B2R603_HUMAN	72.67	2	2		33281	cDNA FLJ92712 highly similar to Homo sapiens heterogeneous nuclear ribonucleoprotein C (C1/C2) (HNRPC) transcript variant 1 mRNA OS=Homo sapiens PE=2 SV=1
38	1149	tr|G3V2Q1|G3V2Q1_HUMAN	72.67	2	2		33571	Heterogeneous nuclear ribonucleoproteins C1/C2 OS=Homo sapiens GN=HNRNPC PE=2 SV=1
38	1150	P07910|HNRPC_HUMAN	72.67	2	2		33670	Heterogeneous nuclear ribonucleoproteins C1/C2 OS=Homo sapiens GN=HNRNPC PE=1 SV=4
38	1151	tr|A8K9A4|A8K9A4_HUMAN	72.67	2	2		33612	cDNA FLJ75154 highly similar to Homo sapiens heterogeneous nuclear ribonucleoprotein C (C1/C2) mRNA OS=Homo sapiens PE=2 SV=1
38	1152	tr|G3V555|G3V555_HUMAN	72.67	2	2		19178	Heterogeneous nuclear ribonucleoproteins C1/C2 (Fragment) OS=Homo sapiens GN=HNRNPC PE=2 SV=1
38	1153	tr|G3V575|G3V575_HUMAN	72.67	2	2		20366	Heterogeneous nuclear ribonucleoproteins C1/C2 (Fragment) OS=Homo sapiens GN=HNRNPC PE=2 SV=1
38	1154	tr|D3DPI2|D3DPI2_HUMAN	72.67	2	2		32314	HCG1641229 isoform CRA_a OS=Homo sapiens GN=hCG_1641229 PE=2 SV=1
38	1157	tr|G3V5X6|G3V5X6_HUMAN	72.67	2	2		12781	Heterogeneous nuclear ribonucleoproteins C1/C2 (Fragment) OS=Homo sapiens GN=HNRNPC PE=2 SV=1
38	1158	tr|G3V3K6|G3V3K6_HUMAN	72.67	2	2		13337	Heterogeneous nuclear ribonucleoproteins C1/C2 (Fragment) OS=Homo sapiens GN=HNRNPC PE=2 SV=1
38	1159	tr|G3V251|G3V251_HUMAN	72.67	2	2		14038	Heterogeneous nuclear ribonucleoproteins C1/C2 (Fragment) OS=Homo sapiens GN=HNRNPC PE=2 SV=1
38	1160	tr|B4DMJ1|B4DMJ1_HUMAN	72.67	2	2		14656	cDNA FLJ52993 highly similar to Heterogeneous nuclear ribonucleoprotein C OS=Homo sapiens PE=2 SV=1
38	1161	tr|B4DSU6|B4DSU6_HUMAN	72.67	2	2		15735	Heterogeneous nuclear ribonucleoproteins C1/C2 OS=Homo sapiens GN=HNRNPC PE=2 SV=1
38	1163	tr|Q6PKD2|Q6PKD2_HUMAN	72.67	2	2		22652	HNRPCL1 protein (Fragment) OS=Homo sapiens GN=HNRPCL1 PE=2 SV=1
38	1164	tr|B7ZW41|B7ZW41_HUMAN	72.67	2	2		32082	Heterogeneous nuclear ribonucleoprotein C-like OS=Homo sapiens GN=LOC440563 PE=2 SV=1
38	1165	O60812|HNRCL_HUMAN	72.67	2	2		32142	Heterogeneous nuclear ribonucleoprotein C-like 1 OS=Homo sapiens GN=HNRNPCL1 PE=1 SV=1
38	1166	tr|B7ZW38|B7ZW38_HUMAN	72.67	2	2		32029	LOC649330 protein OS=Homo sapiens GN=LOC649330 PE=2 SV=1
38	1167	tr|B2RXH8|B2RXH8_HUMAN	72.67	2	2		32072	Heterogeneous nuclear ribonucleoprotein C-like OS=Homo sapiens GN=LOC440563 PE=2 SV=1
71	1192	tr|Q3YBA8|Q3YBA8_HUMAN	29.31	1	1		7786	14-3-3 tau splice variant OS=Homo sapiens PE=4 SV=1
71	1193	tr|B4DJF2|B4DJF2_HUMAN	29.31	1	1		10949	14-3-3 protein epsilon OS=Homo sapiens GN=YWHAE PE=4 SV=1
71	1197	tr|K7EIT4|K7EIT4_HUMAN	29.31	1	1		12711	14-3-3 protein epsilon (Fragment) OS=Homo sapiens GN=YWHAE PE=4 SV=1
71	1199	tr|A2IDB2|A2IDB2_HUMAN	29.31	1	1		18675	14-3-3 protein eta (Fragment) OS=Homo sapiens GN=YWHAH PE=4 SV=1
71	1202	tr|B4DHC4|B4DHC4_HUMAN	29.31	1	1		25657	cDNA FLJ51843 highly similar to 14-3-3 protein gamma OS=Homo sapiens PE=2 SV=1
71	1203	P27348|1433T_HUMAN	29.31	1	1		27764	14-3-3 protein theta OS=Homo sapiens GN=YWHAQ PE=1 SV=1
71	1207	Q04917|1433F_HUMAN	29.31	1	1		28219	14-3-3 protein eta OS=Homo sapiens GN=YWHAH PE=1 SV=4
71	1208	P61981|1433G_HUMAN	29.31	1	1		28303	14-3-3 protein gamma OS=Homo sapiens GN=YWHAG PE=1 SV=2
42	1220	tr|H0YEN5|H0YEN5_HUMAN	33.08	1	1		21154	40S ribosomal protein S2 (Fragment) OS=Homo sapiens GN=RPS2 PE=3 SV=1
42	1224	tr|E9PQD7|E9PQD7_HUMAN	33.08	1	1		25211	40S ribosomal protein S2 OS=Homo sapiens GN=RPS2 PE=2 SV=1
45	1257	tr|Q53G74|Q53G74_HUMAN	25.96	1	1		47718	Ribosomal protein L4 variant (Fragment) OS=Homo sapiens PE=2 SV=1
25	1312	tr|E9PEW8|E9PEW8_HUMAN	24.58	1	1		11346	Hemoglobin subunit delta (Fragment) OS=Homo sapiens GN=HBD PE=2 SV=1
25	1313	tr|B2M1S8|B2M1S8_HUMAN	24.58	1	1		11601	Delta-globin B2 variant (Fragment) OS=Homo sapiens GN=HBD PE=3 SV=1
25	1314	tr|B2M1S6|B2M1S6_HUMAN	24.58	1	1		11435	Beta-globin Tacoma variant (Fragment) OS=Homo sapiens GN=HBB PE=3 SV=1
25	1315	tr|Q4F786|Q4F786_HUMAN	24.58	1	1		11442	Hemoglobin delta Etolia variant (Fragment) OS=Homo sapiens GN=HBD PE=2 SV=1
25	1316	tr|Q4JLR8|Q4JLR8_HUMAN	24.58	1	1		11448	Hemoglobin beta chain (Fragment) OS=Homo sapiens GN=HBB PE=2 SV=1
25	1317	tr|Q670S4|Q670S4_HUMAN	24.58	1	1		11459	Hemoglobin Lepore-Baltimore (Fragment) OS=Homo sapiens PE=2 SV=1
25	1318	tr|Q6J1Z7|Q6J1Z7_HUMAN	24.58	1	1		11446	Hemoglobin beta (Fragment) OS=Homo sapiens GN=HBB PE=2 SV=1
25	1323	tr|E9PFT6|E9PFT6_HUMAN	24.58	1	1		15420	Hemoglobin subunit delta OS=Homo sapiens GN=HBD PE=2 SV=1
51	1342	O95678|K2C75_HUMAN	40.34	2	1		59560	Keratin type II cytoskeletal 75 OS=Homo sapiens GN=KRT75 PE=1 SV=2
61	1395	tr|K7EKI0|K7EKI0_HUMAN	24.22	1	1		233828	Envoplakin OS=Homo sapiens GN=EVPL PE=4 SV=1
81	1415	tr|J3KPZ3|J3KPZ3_HUMAN	20.11	1	1		513643	Probable E3 ubiquitin-protein ligase MYCBP2 OS=Homo sapiens GN=MYCBP2 PE=4 SV=1
107	1432	tr|J3KTL2|J3KTL2_HUMAN	27.91	1	1		28329	Serine/arginine-rich-splicing factor 1 OS=Homo sapiens GN=SRSF1 PE=4 SV=1
32	1434	P22626|ROA2_HUMAN	93.51	3	3		37430	Heterogeneous nuclear ribonucleoproteins A2/B1 OS=Homo sapiens GN=HNRNPA2B1 PE=1 SV=2
71	1439	tr|Q96IR1|Q96IR1_HUMAN	37.86	1	1		27260	RPS4X protein (Fragment) OS=Homo sapiens GN=RPS4X PE=2 SV=2
71	1440	P62701|RS4X_HUMAN	37.86	1	1		29598	40S ribosomal protein S4 X isoform OS=Homo sapiens GN=RPS4X PE=1 SV=2
71	1441	tr|Q53HV1|Q53HV1_HUMAN	37.86	1	1		29579	Ribosomal protein S4 X-linked X isoform variant (Fragment) OS=Homo sapiens PE=2 SV=1
71	1442	tr|B2R491|B2R491_HUMAN	37.86	1	1		29598	Ribosomal protein S4 X-linked isoform CRA_c OS=Homo sapiens GN=RPS4X PE=2 SV=1
78	1443	P62937|PPIA_HUMAN	32.91	1	1		18012	Peptidyl-prolyl cis-trans isomerase A OS=Homo sapiens GN=PPIA PE=1 SV=2
80	1465	tr|G3V203|G3V203_HUMAN	53.56	1	1		18756	60S ribosomal protein L18 OS=Homo sapiens GN=RPL18 PE=2 SV=1
80	1466	Q07020|RL18_HUMAN	53.56	1	1		21634	60S ribosomal protein L18 OS=Homo sapiens GN=RPL18 PE=1 SV=2
80	1467	tr|J3QQ67|J3QQ67_HUMAN	53.56	1	1		21847	60S ribosomal protein L18 (Fragment) OS=Homo sapiens GN=RPL18 PE=3 SV=1
80	1477	tr|F8VUA6|F8VUA6_HUMAN	53.56	1	1		14529	60S ribosomal protein L18 (Fragment) OS=Homo sapiens GN=RPL18 PE=2 SV=1
80	1478	tr|F8VWC5|F8VWC5_HUMAN	53.56	1	1		18091	60S ribosomal protein L18 OS=Homo sapiens GN=RPL18 PE=2 SV=1
80	1479	tr|Q0QEW2|Q0QEW2_HUMAN	53.56	1	1		18732	60S ribosomal protein L18 (Fragment) OS=Homo sapiens GN=RPL18 PE=2 SV=1
80	1480	tr|H0YHA7|H0YHA7_HUMAN	53.56	1	1		18982	60S ribosomal protein L18 (Fragment) OS=Homo sapiens GN=RPL18 PE=3 SV=1
29	1481	Q06830|PRDX1_HUMAN	39.96	1	1		22110	Peroxiredoxin-1 OS=Homo sapiens GN=PRDX1 PE=1 SV=1
29	1501	tr|B2R4P2|B2R4P2_HUMAN	39.96	1	1		22201	cDNA FLJ92164 highly similar to Homo sapiens peroxiredoxin 1 (PRDX1) mRNA OS=Homo sapiens PE=2 SV=1
63	1523	P23396|RS3_HUMAN	59.49	1	1		26688	40S ribosomal protein S3 OS=Homo sapiens GN=RPS3 PE=1 SV=2
63	1524	tr|Q53G83|Q53G83_HUMAN	59.49	1	1		26689	Ribosomal protein S3 variant (Fragment) OS=Homo sapiens PE=2 SV=1
63	1525	tr|J3KN86|J3KN86_HUMAN	59.49	1	1		28487	40S ribosomal protein S3 OS=Homo sapiens GN=RPS3 PE=3 SV=1
25	1535	tr|A1YZ08|A1YZ08_HUMAN	24.58	1	1		11419	Beta-globin (Fragment) OS=Homo sapiens GN=HBB PE=3 SV=1
38	1536	tr|A5D904|A5D904_HUMAN	27.47	1	1		13161	RPS9 protein (Fragment) OS=Homo sapiens GN=RPS9 PE=2 SV=1
38	1537	P46781|RS9_HUMAN	27.47	1	1		22591	40S ribosomal protein S9 OS=Homo sapiens GN=RPS9 PE=1 SV=3
78	1538	tr|Q567Q0|Q567Q0_HUMAN	23.62	1	1		11418	Peptidyl-prolyl cis-trans isomerase A OS=Homo sapiens GN=PPIA PE=3 SV=1
51	1574	tr|E7EX53|E7EX53_HUMAN	82.31	3	3		15722	Ribosomal protein L15 (Fragment) OS=Homo sapiens GN=RPL15 PE=2 SV=1
51	1575	tr|E7EQV9|E7EQV9_HUMAN	82.31	3	3		20510	Ribosomal protein L15 (Fragment) OS=Homo sapiens GN=RPL15 PE=2 SV=1
51	1577	P61313|RL15_HUMAN	82.31	3	3		24146	60S ribosomal protein L15 OS=Homo sapiens GN=RPL15 PE=1 SV=2
107	1585	tr|J3KSR8|J3KSR8_HUMAN	27.91	1	1		16459	Serine/arginine-rich-splicing factor 1 (Fragment) OS=Homo sapiens GN=SRSF1 PE=4 SV=1
38	1591	tr|B5MCT8|B5MCT8_HUMAN	27.47	1	1		16628	40S ribosomal protein S9 OS=Homo sapiens GN=RPS9 PE=3 SV=1
38	1592	tr|C9JM19|C9JM19_HUMAN	27.47	1	1		18401	40S ribosomal protein S9 OS=Homo sapiens GN=RPS9 PE=3 SV=1
38	1593	tr|B7Z732|B7Z732_HUMAN	27.47	1	1		18564	cDNA FLJ61636 highly similar to 40S ribosomal protein S9 OS=Homo sapiens PE=2 SV=1
80	1606	tr|F8VYV2|F8VYV2_HUMAN	53.56	1	1		15639	60S ribosomal protein L18 OS=Homo sapiens GN=RPL18 PE=2 SV=1
80	1607	tr|B4DDY5|B4DDY5_HUMAN	53.56	1	1		16009	60S ribosomal protein L18 OS=Homo sapiens PE=2 SV=1
63	1624	tr|F2Z2S8|F2Z2S8_HUMAN	59.49	1	1		13069	40S ribosomal protein S3 OS=Homo sapiens GN=RPS3 PE=2 SV=1
63	1625	tr|H0YF32|H0YF32_HUMAN	59.49	1	1		13515	40S ribosomal protein S3 (Fragment) OS=Homo sapiens GN=RPS3 PE=4 SV=1
63	1626	tr|H0YCJ7|H0YCJ7_HUMAN	59.49	1	1		15003	40S ribosomal protein S3 (Fragment) OS=Homo sapiens GN=RPS3 PE=4 SV=1
63	1627	tr|E9PL45|E9PL45_HUMAN	59.49	1	1		18358	40S ribosomal protein S3 OS=Homo sapiens GN=RPS3 PE=2 SV=1
63	1672	tr|H0YEU2|H0YEU2_HUMAN	59.49	1	1		18680	40S ribosomal protein S3 (Fragment) OS=Homo sapiens GN=RPS3 PE=3 SV=1
63	1673	tr|E9PL09|E9PL09_HUMAN	59.49	1	1		25371	40S ribosomal protein S3 OS=Homo sapiens GN=RPS3 PE=2 SV=1
44	1679	tr|C9J3N8|C9J3N8_HUMAN	42.8	1	1		3888	Heat shock protein beta-1 OS=Homo sapiens GN=HSPB1 PE=2 SV=1
31	1681	tr|F8VQQ4|F8VQQ4_HUMAN	63.75	1	1		24221	Tubulin alpha-1A chain (Fragment) OS=Homo sapiens GN=TUBA1A PE=2 SV=1
40	1689	tr|B4DI39|B4DI39_HUMAN	109.47	4	2		67531	cDNA FLJ54328 highly similar to Heat shock 70 kDa protein 1 OS=Homo sapiens PE=2 SV=1
40	1690	tr|B4DWK5|B4DWK5_HUMAN	109.47	4	2		67994	cDNA FLJ54392 highly similar to Heat shock 70 kDa protein 1 OS=Homo sapiens PE=2 SV=1
40	1691	tr|Q59EJ3|Q59EJ3_HUMAN	109.47	4	2		77496	Heat shock 70kDa protein 1A variant (Fragment) OS=Homo sapiens PE=2 SV=1
73	1709	tr|J3QLE5|J3QLE5_HUMAN	20.92	1	1		17546	Small nuclear ribonucleoprotein-associated protein N (Fragment) OS=Homo sapiens GN=SNRPN PE=4 SV=1
73	1710	tr|Q6LBS1|Q6LBS1_HUMAN	20.92	1	1		21993	Small nuclear ribonucleoprotein-associated protein (Fragment) OS=Homo sapiens PE=2 SV=1
73	1711	tr|Q66K91|Q66K91_HUMAN	20.92	1	1		23656	Small nuclear ribonucleoprotein-associated protein OS=Homo sapiens GN=SNRPB PE=2 SV=1
73	1712	tr|Q5XPV6|Q5XPV6_HUMAN	20.92	1	1		23657	Small nuclear ribonucleoprotein-associated protein OS=Homo sapiens PE=2 SV=1
73	1713	tr|B4DVS0|B4DVS0_HUMAN	20.92	1	1		24088	Small nuclear ribonucleoprotein-associated protein OS=Homo sapiens GN=SNRPB PE=2 SV=1
73	1714	P14678|RSMB_HUMAN	20.92	1	1		24610	Small nuclear ribonucleoprotein-associated proteins B and B' OS=Homo sapiens GN=SNRPB PE=1 SV=2
73	1715	tr|Q53HE7|Q53HE7_HUMAN	20.92	1	1		24556	Small nuclear ribonucleoprotein-associated protein (Fragment) OS=Homo sapiens PE=2 SV=1
73	1716	P63162|RSMN_HUMAN	20.92	1	1		24614	Small nuclear ribonucleoprotein-associated protein N OS=Homo sapiens GN=SNRPN PE=1 SV=1
73	1717	tr|Q9UIS4|Q9UIS4_HUMAN	20.92	1	1		27267	Small nuclear ribonucleoprotein-associated protein OS=Homo sapiens GN=SNRPB PE=2 SV=1
73	1718	tr|B3KVR1|B3KVR1_HUMAN	20.92	1	1		25076	Small nuclear ribonucleoprotein-associated protein OS=Homo sapiens GN=SNRPN PE=2 SV=1
73	1720	tr|Q15182|Q15182_HUMAN	20.92	1	1		29671	Small nuclear ribonucleoprotein-associated protein OS=Homo sapiens GN=SNRPB PE=2 SV=1
14	1734	tr|F8W1U3|F8W1U3_HUMAN	56.87	3	3		32549	Keratin type II cytoskeletal 8 (Fragment) OS=Homo sapiens GN=KRT8 PE=2 SV=1
40	1761	tr|H0YIE7|H0YIE7_HUMAN	105.94	4	2		25218	Heat shock 70 kDa protein 1-like OS=Homo sapiens GN=HSPA1L PE=3 SV=1
40	1762	tr|B4DNV4|B4DNV4_HUMAN	105.94	4	2		25279	cDNA FLJ53071 highly similar to Heat shock 70 kDa protein 1 OS=Homo sapiens PE=2 SV=1
38	1764	tr|Q53HF2|Q53HF2_HUMAN	119.94	5	3		53500	Heat shock 70kDa protein 8 isoform 2 variant (Fragment) OS=Homo sapiens PE=2 SV=1
40	1766	tr|F8W1P1|F8W1P1_HUMAN	109.47	4	2		58302	Heat shock 70 kDa protein 1-like OS=Homo sapiens GN=HSPA1L PE=2 SV=1
38	1767	tr|B3KTV0|B3KTV0_HUMAN	119.94	5	3		67980	cDNA FLJ38781 fis clone LIVER2000216 highly similar to HEAT SHOCK COGNATE 71 kDa PROTEIN OS=Homo sapiens PE=2 SV=1
38	1768	tr|E9PKE3|E9PKE3_HUMAN	119.94	5	3		68806	Heat shock cognate 71 kDa protein OS=Homo sapiens GN=HSPA8 PE=2 SV=1
40	1770	tr|B2RCQ9|B2RCQ9_HUMAN	109.47	4	2		70376	cDNA FLJ96225 highly similar to Homo sapiens heat shock 70kDa protein 1-like (HSPA1L) mRNA OS=Homo sapiens PE=2 SV=1
74	1771	tr|B2R6X5|B2R6X5_HUMAN	41.04	1	1		70958	cDNA FLJ93166 highly similar to Homo sapiens heat shock 70kDa protein 6 (HSP70B') (HSPA6) mRNA OS=Homo sapiens PE=2 SV=1
74	1772	tr|B3KSM6|B3KSM6_HUMAN	41.04	1	1		70972	cDNA FLJ36606 fis clone TRACH2015654 highly similar to HEAT SHOCK 70 kDa PROTEIN 6 OS=Homo sapiens PE=2 SV=1
38	1774	tr|Q53GZ6|Q53GZ6_HUMAN	119.94	5	3		70899	Heat shock 70kDa protein 8 isoform 1 variant (Fragment) OS=Homo sapiens PE=2 SV=1
45	1780	tr|G3V5W4|G3V5W4_HUMAN	24.82	1	1		10831	Tubulin beta-3 chain OS=Homo sapiens GN=TUBB3 PE=2 SV=1
45	1781	tr|G3V2R8|G3V2R8_HUMAN	24.82	1	1		13583	HCG1983504 isoform CRA_e OS=Homo sapiens GN=TUBB3 PE=2 SV=1
45	1782	tr|G3V3R4|G3V3R4_HUMAN	24.82	1	1		16432	HCG1983504 isoform CRA_c OS=Homo sapiens GN=TUBB3 PE=2 SV=1
45	1783	tr|G3V2N6|G3V2N6_HUMAN	24.82	1	1		18288	HCG1983504 isoform CRA_d OS=Homo sapiens GN=TUBB3 PE=2 SV=1
64	1796	tr|F5H308|F5H308_HUMAN	47.49	1	1		33656	L-lactate dehydrogenase OS=Homo sapiens GN=LDHA PE=2 SV=1
64	1797	tr|B4DJI1|B4DJI1_HUMAN	47.49	1	1		33593	L-lactate dehydrogenase OS=Homo sapiens PE=2 SV=1
64	1800	P00338|LDHA_HUMAN	47.49	1	1		36689	L-lactate dehydrogenase A chain OS=Homo sapiens GN=LDHA PE=1 SV=2
133	1808	tr|C9JNW5|C9JNW5_HUMAN	31.4	1	1		17543	60S ribosomal protein L24 OS=Homo sapiens GN=RPL24 PE=4 SV=1
44	1822	tr|Q3LTJ8|Q3LTJ8_HUMAN	36.31	1	1		8717	MHC class II antigen (Fragment) OS=Homo sapiens GN=HLA-DRB1 PE=2 SV=1
44	1823	tr|Q29691|Q29691_HUMAN	36.31	1	1		9532	MHC Class II HLA DRB1 protein (Fragment) OS=Homo sapiens GN=MHC Class II HLA DRB1 PE=2 SV=1
44	1824	tr|P79486|P79486_HUMAN	36.31	1	1		9900	HLA-DRB1*11 protein (Fragment) OS=Homo sapiens GN=HLA-DRB1*11 PE=4 SV=1
44	1825	tr|Q30036|Q30036_HUMAN	36.31	1	1		10003	MHC class II HLA-DP-beta chain (DPB15) (Fragment) OS=Homo sapiens PE=2 SV=1
44	1827	tr|Q31619|Q31619_HUMAN	36.31	1	1		10720	HLA-DPB1 protein (Fragment) OS=Homo sapiens GN=HLA-DPB1 PE=2 SV=1
44	1828	tr|D7GL11|D7GL11_HUMAN	36.31	1	1		10472	MHC class II antigen (Fragment) OS=Homo sapiens GN=HLA-DRB1 PE=4 SV=1
44	1829	tr|F4YUA7|F4YUA7_HUMAN	36.31	1	1		10836	MHC class II antigen (Fragment) OS=Homo sapiens GN=HLA-DRB1 PE=2 SV=1
44	1830	tr|F8R8N1|F8R8N1_HUMAN	36.31	1	1		10834	MHC class II antigen (Fragment) OS=Homo sapiens GN=HLA-DR15 PE=2 SV=1
44	1831	tr|F4YZX3|F4YZX3_HUMAN	36.31	1	1		10834	MHC class II antigen (Fragment) OS=Homo sapiens GN=HLA-DRB1 PE=2 SV=1
44	1832	tr|J7RFS4|J7RFS4_HUMAN	36.31	1	1		10836	MHC class II antigen (Fragment) OS=Homo sapiens GN=HLA-DRB1 PE=4 SV=1
44	1833	tr|Q9GJ28|Q9GJ28_HUMAN	36.31	1	1		10944	MHC class II antigen DR beta 1 chain (Fragment) OS=Homo sapiens GN=HLA-DRB1 PE=2 SV=1
44	1834	tr|Q9UM29|Q9UM29_HUMAN	36.31	1	1		10864	Cell surface glycoprotein (Fragment) OS=Homo sapiens GN=HLA-DRB3 PE=2 SV=1
44	1835	tr|F8RHN0|F8RHN0_HUMAN	36.31	1	1		10894	MHC class II antigen (Fragment) OS=Homo sapiens GN=HLA-DRB1 PE=2 SV=1
44	1836	tr|E3SGD4|E3SGD4_HUMAN	36.31	1	1		10785	MHC class II antigen (Fragment) OS=Homo sapiens GN=HLA-DRB1 PE=4 SV=1
44	1838	tr|E3SWQ9|E3SWQ9_HUMAN	36.31	1	1		10919	MHC class II antigen (Fragment) OS=Homo sapiens GN=HLA-DRB1 PE=4 SV=1
44	1840	tr|L0BVW7|L0BVW7_HUMAN	36.31	1	1		10636	MHC class II antigen (Fragment) OS=Homo sapiens GN=HLA-DQB1 PE=4 SV=1
44	1841	tr|D6PZY9|D6PZY9_HUMAN	36.31	1	1		10768	MHC class II antigen (Fragment) OS=Homo sapiens GN=HLA-DRB1 PE=4 SV=1
44	1842	tr|D2DL45|D2DL45_HUMAN	36.31	1	1		10919	MHC class II antigen (Fragment) OS=Homo sapiens GN=HLA-DRB1 PE=4 SV=1
44	1843	tr|A0AQY0|A0AQY0_HUMAN	36.31	1	1		10904	MHC class II antigen (Fragment) OS=Homo sapiens GN=HLA-DRB1 PE=4 SV=1
44	1844	tr|D5L9F5|D5L9F5_HUMAN	36.31	1	1		10876	MHC class II antigen (Fragment) OS=Homo sapiens GN=HLA-DRB1 PE=4 SV=1
44	1845	tr|G0WVD5|G0WVD5_HUMAN	36.31	1	1		10904	MHC class II antigen (Fragment) OS=Homo sapiens GN=HLA-DRB1 PE=4 SV=1
44	1846	tr|F4NBN5|F4NBN5_HUMAN	36.31	1	1		10584	MHC class II antigen (Fragment) OS=Homo sapiens GN=HLA-DRB1 PE=4 SV=1
44	1847	tr|Q8HWG3|Q8HWG3_HUMAN	36.31	1	1		10920	MHC class II antigen (Fragment) OS=Homo sapiens GN=HLA-DRB1 PE=4 SV=1
44	1851	tr|Q29635|Q29635_HUMAN	36.31	1	1		16073	HLA-DRB1-1113 protein OS=Homo sapiens GN=HLA-DRB1-1113 PE=4 SV=3
44	1855	tr|Q3LAC3|Q3LAC3_HUMAN	36.31	1	1		21212	MHC class II antigen (Fragment) OS=Homo sapiens GN=HLA-DRB1 PE=2 SV=1
44	1856	tr|Q3LAA7|Q3LAA7_HUMAN	36.31	1	1		21286	MHC class II antigen (Fragment) OS=Homo sapiens GN=HLA-DRB1 PE=2 SV=1
44	1857	tr|Q3LAA5|Q3LAA5_HUMAN	36.31	1	1		21245	MHC class II antigen (Fragment) OS=Homo sapiens GN=HLA-DRB1 PE=2 SV=1
44	1858	tr|Q95IE4|Q95IE4_HUMAN	36.31	1	1		21183	Leucocyte antigen DRB (Fragment) OS=Homo sapiens GN=HLA-DRB1 PE=2 SV=1
44	1863	tr|H0Y4S5|H0Y4S5_HUMAN	36.31	1	1		26084	HLA class II histocompatibility antigen DP beta 1 chain (Fragment) OS=Homo sapiens GN=HLA-DPB1 PE=4 SV=1
44	1869	tr|Q30099|Q30099_HUMAN	36.31	1	1		29661	Lymphocyte antigen OS=Homo sapiens GN=HLA-DQ-beta PE=2 SV=1
63	1896	tr|E9PQ96|E9PQ96_HUMAN	59.49	1	1		10279	40S ribosomal protein S3 OS=Homo sapiens GN=RPS3 PE=2 SV=1
63	1897	tr|E9PJH4|E9PJH4_HUMAN	59.49	1	1		12941	40S ribosomal protein S3 OS=Homo sapiens GN=RPS3 PE=2 SV=1
63	1898	tr|E9PK82|E9PK82_HUMAN	59.49	1	1		14318	40S ribosomal protein S3 (Fragment) OS=Homo sapiens GN=RPS3 PE=2 SV=1
63	1899	tr|E9PPU1|E9PPU1_HUMAN	59.49	1	1		17407	40S ribosomal protein S3 OS=Homo sapiens GN=RPS3 PE=2 SV=1
31	1905	tr|F8VRZ4|F8VRZ4_HUMAN	63.75	1	1		12220	Tubulin alpha-1A chain (Fragment) OS=Homo sapiens GN=TUBA1A PE=2 SV=1
31	1906	tr|F8VS66|F8VS66_HUMAN	63.75	1	1		14401	Tubulin alpha-1C chain OS=Homo sapiens GN=TUBA1C PE=2 SV=1
73	1973	Q92611|EDEM1_HUMAN	20.92	1	1		73768	ER degradation-enhancing alpha-mannosidase-like protein 1 OS=Homo sapiens GN=EDEM1 PE=1 SV=1
123	2024	tr|D6RCF2|D6RCF2_HUMAN	57.2	1	1		17575	Histone H2A OS=Homo sapiens GN=H2AFY PE=2 SV=1
80	2031	tr|K7EJ44|K7EJ44_HUMAN	22.68	1	1		11390	Profilin 1 isoform CRA_b OS=Homo sapiens GN=PFN1 PE=4 SV=1
80	2032	P07737|PROF1_HUMAN	22.68	1	1		15054	Profilin-1 OS=Homo sapiens GN=PFN1 PE=1 SV=2
42	2115	tr|C8CJC2|C8CJC2_HUMAN	43.14	1	1		21032	MHC class I antigen (Fragment) OS=Homo sapiens GN=HLA-B PE=3 SV=1
42	2130	tr|I6MHI2|I6MHI2_HUMAN	43.14	1	1		21191	MHC class I antigen (Fragment) OS=Homo sapiens GN=HLA-B PE=3 SV=1
37	2395	tr|H3BPX2|H3BPX2_HUMAN	33.23	1	1		945950	Obscurin OS=Homo sapiens GN=OBSCN PE=4 SV=1
55	2402	tr|E7ERU0|E7ERU0_HUMAN	21.93	1	1		615661	Dystonin OS=Homo sapiens GN=DST PE=2 SV=1
55	2405	tr|F8W9J4|F8W9J4_HUMAN	21.93	1	1		847987	Dystonin OS=Homo sapiens GN=DST PE=2 SV=1
55	2406	Q03001|DYST_HUMAN	21.93	1	1		860679	Dystonin OS=Homo sapiens GN=DST PE=1 SV=4
55	2407	tr|E7ERU2|E7ERU2_HUMAN	21.93	1	1		860820	Dystonin OS=Homo sapiens GN=DST PE=2 SV=2
55	2409	tr|E9PEB9|E9PEB9_HUMAN	21.93	1	1		880575	Dystonin OS=Homo sapiens GN=DST PE=2 SV=2
84	3301	tr|F8W181|F8W181_HUMAN	34.52	1	1		25892	60S ribosomal protein L6 (Fragment) OS=Homo sapiens GN=RPL6 PE=2 SV=1
84	3302	tr|Q8TBK5|Q8TBK5_HUMAN	34.52	1	1		32742	60S ribosomal protein L6 OS=Homo sapiens GN=RPL6 PE=2 SV=1
84	3303	tr|Q8N5Z7|Q8N5Z7_HUMAN	34.52	1	1		32726	60S ribosomal protein L6 OS=Homo sapiens GN=RPL6 PE=2 SV=1
84	3304	Q02878|RL6_HUMAN	34.52	1	1		32728	60S ribosomal protein L6 OS=Homo sapiens GN=RPL6 PE=1 SV=3
84	3305	tr|Q9HBB3|Q9HBB3_HUMAN	34.52	1	1		32891	60S ribosomal protein L6 OS=Homo sapiens PE=2 SV=1
54	3339	tr|D2DKJ6|D2DKJ6_HUMAN	79.27	2	2		21218	MHC class I antigen (Fragment) OS=Homo sapiens GN=HLA-C PE=3 SV=1
84	3377	tr|B2R4K7|B2R4K7_HUMAN	34.52	1	1		32702	60S ribosomal protein L6 OS=Homo sapiens PE=2 SV=1
42	3388	tr|D6MJD5|D6MJD5_HUMAN	43.14	1	1		20925	MHC class I antigen (Fragment) OS=Homo sapiens GN=HLA-A PE=3 SV=1
70	3441	tr|F8VZ45|F8VZ45_HUMAN	25.34	1	1		17800	60S ribosomal protein L6 (Fragment) OS=Homo sapiens GN=RPL6 PE=2 SV=1
38	3451	P11142|HSP7C_HUMAN	119.94	5	3		70898	Heat shock cognate 71 kDa protein OS=Homo sapiens GN=HSPA8 PE=1 SV=1
29	3467	tr|B4DF70|B4DF70_HUMAN	39.96	1	1		20107	cDNA FLJ60461 highly similar to Peroxiredoxin-2 (EC 1.11.1.15) OS=Homo sapiens PE=2 SV=1
29	3468	P32119|PRDX2_HUMAN	39.96	1	1		21892	Peroxiredoxin-2 OS=Homo sapiens GN=PRDX2 PE=1 SV=5
94	3481	tr|Q53SW3|Q53SW3_HUMAN	20.03	1	1		52094	Putative uncharacterized protein DPYSL5 (Fragment) OS=Homo sapiens GN=DPYSL5 PE=2 SV=1
25	4946	tr|Q14477|Q14477_HUMAN	24.58	1	1		10928	Hbbm fused globin protein (Fragment) OS=Homo sapiens GN=HBB PE=2 SV=1
62	4960	tr|B4E241|B4E241_HUMAN	49.67	2	2		14203	Serine/arginine-rich-splicing factor 3 OS=Homo sapiens GN=SRSF3 PE=2 SV=1
62	4961	P84103|SRSF3_HUMAN	49.67	2	2		19330	Serine/arginine-rich splicing factor 3 OS=Homo sapiens GN=SRSF3 PE=1 SV=1
62	4962	tr|B2R6F3|B2R6F3_HUMAN	49.67	2	2		19330	Splicing factor arginine/serine-rich 3 OS=Homo sapiens GN=SFRS3 PE=2 SV=1
30	4983	tr|K7EKV9|K7EKV9_HUMAN	78.28	2	2		11715	ATP synthase subunit alpha mitochondrial (Fragment) OS=Homo sapiens GN=ATP5A1 PE=4 SV=1
30	4984	tr|K7EJP1|K7EJP1_HUMAN	78.28	2	2		15339	ATP synthase subunit alpha mitochondrial (Fragment) OS=Homo sapiens GN=ATP5A1 PE=4 SV=1
30	4985	tr|K7EQT2|K7EQT2_HUMAN	78.28	2	2		17258	ATP synthase subunit alpha mitochondrial (Fragment) OS=Homo sapiens GN=ATP5A1 PE=4 SV=1
30	4986	tr|B4DGW3|B4DGW3_HUMAN	78.28	2	2		17700	cDNA FLJ54625 highly similar to ATP synthase subunit alpha mitochondrial (EC 3.6.3.14) OS=Homo sapiens PE=2 SV=1
30	4987	tr|K7ERX7|K7ERX7_HUMAN	78.28	2	2		21590	ATP synthase subunit alpha mitochondrial (Fragment) OS=Homo sapiens GN=ATP5A1 PE=4 SV=1
30	4988	tr|K7EK77|K7EK77_HUMAN	78.28	2	2		22200	ATP synthase subunit alpha mitochondrial (Fragment) OS=Homo sapiens GN=ATP5A1 PE=3 SV=1
30	4989	P25705|ATPA_HUMAN	78.28	2	2		59751	ATP synthase subunit alpha mitochondrial OS=Homo sapiens GN=ATP5A1 PE=1 SV=1
31	4999	tr|F8VRK0|F8VRK0_HUMAN	63.75	1	1		5319	Tubulin alpha-1B chain (Fragment) OS=Homo sapiens GN=TUBA1B PE=2 SV=1
31	5000	tr|F8VX09|F8VX09_HUMAN	63.75	1	1		8288	Tubulin alpha-1B chain (Fragment) OS=Homo sapiens GN=TUBA1B PE=2 SV=1
31	5002	tr|F8VWV9|F8VWV9_HUMAN	63.75	1	1		8944	Tubulin alpha-1B chain (Fragment) OS=Homo sapiens GN=TUBA1B PE=2 SV=1
51	5021	tr|E9PC84|E9PC84_HUMAN	26.19	1	1		210852	Tenascin OS=Homo sapiens GN=TNC PE=2 SV=1
51	5022	tr|J3QSU6|J3QSU6_HUMAN	26.19	1	1		220851	Tenascin OS=Homo sapiens GN=TNC PE=4 SV=1
77	5039	tr|I3L3D5|I3L3D5_HUMAN	26.57	1	1		17517	Profilin-1 (Fragment) OS=Homo sapiens GN=PFN1 PE=4 SV=1
89	5252	tr|C9J7B5|C9J7B5_HUMAN	27.97	1	1		11945	Eukaryotic translation initiation factor 5A-2 OS=Homo sapiens GN=EIF5A2 PE=2 SV=1
89	5253	Q9GZV4|IF5A2_HUMAN	27.97	1	1		16793	Eukaryotic translation initiation factor 5A-2 OS=Homo sapiens GN=EIF5A2 PE=1 SV=3
64	6737	tr|H0Y6E7|H0Y6E7_HUMAN	28.52	1	1		31865	RNA-binding motif protein X chromosome N-terminally processed (Fragment) OS=Homo sapiens GN=RBMX PE=4 SV=2
64	6738	tr|H3BT71|H3BT71_HUMAN	28.52	1	1		32197	RNA-binding motif protein X chromosome N-terminally processed OS=Homo sapiens GN=RBMX PE=4 SV=1
103	6751	tr|H3BUY5|H3BUY5_HUMAN	26.66	1	1		28745	RNA-binding motif protein X chromosome N-terminally processed OS=Homo sapiens GN=RBMX PE=4 SV=1
40	6804	P39023|RL3_HUMAN	41.98	1	1		46109	60S ribosomal protein L3 OS=Homo sapiens GN=RPL3 PE=1 SV=2
99	6853	tr|B4DLV7|B4DLV7_HUMAN	32.23	1	1		51154	cDNA FLJ60299 highly similar to Rab GDP dissociation inhibitor beta OS=Homo sapiens PE=2 SV=1
40	6855	tr|B3KS36|B3KS36_HUMAN	41.98	1	1		40145	cDNA FLJ35376 fis clone SKMUS2004044 highly similar to Homo sapiens ribosomal protein L3 (RPL3) transcript variant 2 mRNA OS=Homo sapiens PE=2 SV=1
40	6876	tr|Q96QL0|Q96QL0_HUMAN	41.98	1	1		46120	Ribosomal protein L3 OS=Homo sapiens GN=RPL3 PE=2 SV=1
42	6877	tr|G0ZDT0|G0ZDT0_HUMAN	43.14	1	1		20987	MHC class I antigen (Fragment) OS=Homo sapiens GN=HLA-A PE=3 SV=1
42	6881	tr|F8R123|F8R123_HUMAN	43.14	1	1		21243	MHC class I antigen (Fragment) OS=Homo sapiens GN=HLA-A PE=3 SV=1
40	6895	tr|H7C422|H7C422_HUMAN	41.98	1	1		34968	60S ribosomal protein L3 (Fragment) OS=Homo sapiens GN=RPL3 PE=3 SV=1
54	6930	tr|F2VNR3|F2VNR3_HUMAN	79.27	2	2		21125	MHC class I antigen (Fragment) OS=Homo sapiens GN=HLA-C PE=3 SV=1
40	6948	tr|H7C3M2|H7C3M2_HUMAN	41.98	1	1		29647	60S ribosomal protein L3 (Fragment) OS=Homo sapiens GN=RPL3 PE=4 SV=1
40	6992	tr|B4DN06|B4DN06_HUMAN	41.98	1	1		13916	Ribosomal protein L3 isoform CRA_i OS=Homo sapiens GN=RPL3 PE=1 SV=1
40	6993	tr|F8WCR1|F8WCR1_HUMAN	41.98	1	1		19768	60S ribosomal protein L3 OS=Homo sapiens GN=RPL3 PE=2 SV=1
42	6999	tr|E3Q0X5|E3Q0X5_HUMAN	43.14	1	1		21006	MHC class I antigen (Fragment) OS=Homo sapiens GN=HLA-A PE=2 SV=1
67	7087	P30041|PRDX6_HUMAN	27.16	1	1		25035	Peroxiredoxin-6 OS=Homo sapiens GN=PRDX6 PE=1 SV=3
46	7171	tr|Q6FHV6|Q6FHV6_HUMAN	36.87	1	1		47269	ENO2 protein OS=Homo sapiens GN=ENO2 PE=2 SV=1
57	7234	tr|Q69YT6|Q69YT6_HUMAN	28.28	1	1		21203	Putative uncharacterized protein DKFZp547B159 (Fragment) OS=Homo sapiens GN=DKFZp547B159 PE=2 SV=1
57	7235	tr|F8W0J0|F8W0J0_HUMAN	28.28	1	1		21481	Spliceosome RNA helicase DDX39B OS=Homo sapiens GN=DDX39B PE=2 SV=1
57	7236	tr|B0UZB3|B0UZB3_HUMAN	28.28	1	1		21680	HLA-B associated transcript 1 (Fragment) OS=Homo sapiens GN=BAT1 PE=2 SV=1
57	7237	tr|H0Y400|H0Y400_HUMAN	28.28	1	1		21798	Spliceosome RNA helicase DDX39B (Fragment) OS=Homo sapiens GN=DDX39B PE=4 SV=1
57	7238	tr|H0Y7X6|H0Y7X6_HUMAN	28.28	1	1		38079	Spliceosome RNA helicase DDX39B (Fragment) OS=Homo sapiens GN=DDX39B PE=4 SV=1
57	7239	tr|H0Y7G4|H0Y7G4_HUMAN	28.28	1	1		38244	Spliceosome RNA helicase DDX39B (Fragment) OS=Homo sapiens GN=DDX39B PE=4 SV=1
57	7240	tr|B4DP52|B4DP52_HUMAN	28.28	1	1		40577	HCG2005638 isoform CRA_c OS=Homo sapiens GN=DDX39B PE=2 SV=1
57	7241	tr|Q5STU3|Q5STU3_HUMAN	28.28	1	1		48826	HLA-B associated transcript 1 OS=Homo sapiens GN=DDX39B PE=4 SV=2
57	7242	O00148|DX39A_HUMAN	28.28	1	1		49130	ATP-dependent RNA helicase DDX39A OS=Homo sapiens GN=DDX39A PE=1 SV=2
57	7243	Q13838|DX39B_HUMAN	28.28	1	1		48991	Spliceosome RNA helicase DDX39B OS=Homo sapiens GN=DDX39B PE=1 SV=1
57	7244	tr|F8VQ10|F8VQ10_HUMAN	28.28	1	1		50746	Spliceosome RNA helicase DDX39B OS=Homo sapiens GN=DDX39B PE=4 SV=1
57	7245	tr|B4DX78|B4DX78_HUMAN	28.28	1	1		53697	cDNA FLJ55484 highly similar to ATP-dependent RNA helicase DDX39 (EC 3.6.1.-) OS=Homo sapiens PE=2 SV=1
101	7333	tr|E7ER44|E7ER44_HUMAN	26.28	1	1		77970	Kaliocin-1 OS=Homo sapiens GN=LTF PE=2 SV=1
101	7338	tr|B2MV13|B2MV13_HUMAN	26.28	1	1		78396	Lactoferrin OS=Homo sapiens GN=LTF PE=2 SV=1
61	7402	tr|F8VXY0|F8VXY0_HUMAN	68.96	2	1		32680	Heterogeneous nuclear ribonucleoprotein A1 OS=Homo sapiens GN=HNRNPA1 PE=2 SV=1
61	7403	tr|F8VSB5|F8VSB5_HUMAN	68.96	2	1		32829	Heterogeneous nuclear ribonucleoprotein A1 OS=Homo sapiens GN=HNRNPA1 PE=2 SV=1
61	7404	tr|F8VRQ1|F8VRQ1_HUMAN	68.96	2	1		33155	Heterogeneous nuclear ribonucleoprotein A1 OS=Homo sapiens GN=HNRNPA1 PE=2 SV=1
61	7405	tr|F8W6I7|F8W6I7_HUMAN	68.96	2	1		34223	Heterogeneous nuclear ribonucleoprotein A1 OS=Homo sapiens GN=HNRNPA1 PE=2 SV=1
61	7406	tr|Q6IPF2|Q6IPF2_HUMAN	68.96	2	1		34180	Heterogeneous nuclear ribonucleoprotein A1 OS=Homo sapiens GN=HNRPA1 PE=2 SV=1
61	7407	tr|F8W1S7|F8W1S7_HUMAN	68.96	2	1		35508	Heterogeneous nuclear ribonucleoprotein A1 OS=Homo sapiens GN=HNRNPA1 PE=2 SV=1
61	7408	P09651|ROA1_HUMAN	68.96	2	1		38747	Heterogeneous nuclear ribonucleoprotein A1 OS=Homo sapiens GN=HNRNPA1 PE=1 SV=5
61	7418	tr|F8VTQ5|F8VTQ5_HUMAN	68.96	2	1		16536	Heterogeneous nuclear ribonucleoprotein A1 (Fragment) OS=Homo sapiens GN=HNRNPA1 PE=2 SV=1
61	7531	tr|F8VZ49|F8VZ49_HUMAN	68.96	2	1		25687	Heterogeneous nuclear ribonucleoprotein A1 (Fragment) OS=Homo sapiens GN=HNRNPA1 PE=2 SV=1
61	7532	tr|Q0VAC0|Q0VAC0_HUMAN	68.96	2	1		34152	Heterogeneous nuclear ribonucleoprotein A1 OS=Homo sapiens GN=HNRPA1 PE=2 SV=1
61	7533	Q32P51|RA1L2_HUMAN	68.96	2	1		34225	Heterogeneous nuclear ribonucleoprotein A1-like 2 OS=Homo sapiens GN=HNRNPA1L2 PE=2 SV=2
35	7576	tr|E9PS23|E9PS23_HUMAN	39.18	1	1	Acetylation (N-term)	10181	Cofilin-1 (Fragment) OS=Homo sapiens GN=CFL1 PE=2 SV=1
101	7601	tr|Q19KS2|Q19KS2_HUMAN	26.28	1	1		39143	Lactoferrin (Fragment) OS=Homo sapiens PE=2 SV=1
232	7695	tr|E9PF63|E9PF63_HUMAN	25.03	2	1		133266	Rho-associated protein kinase 2 OS=Homo sapiens GN=ROCK2 PE=2 SV=1
67	9097	tr|A4UCS6|A4UCS6_HUMAN	27.16	1	1		9032	Peroxiredoxin 6 (Fragment) OS=Homo sapiens PE=2 SV=1
127	9219	tr|E9PLL6|E9PLL6_HUMAN	49.97	1	1		12201	60S ribosomal protein L27a OS=Homo sapiens GN=RPL27A PE=2 SV=1
127	9324	tr|E9PLX7|E9PLX7_HUMAN	49.97	1	1		12477	60S ribosomal protein L27a OS=Homo sapiens GN=RPL27A PE=2 SV=1
41	9383	tr|H0YKD8|H0YKD8_HUMAN	42.28	2	1		19072	60S ribosomal protein L28 OS=Homo sapiens GN=RPL28 PE=4 SV=1
67	9403	tr|J3KSS0|J3KSS0_HUMAN	26.63	1	1		7575	60S ribosomal protein L26 OS=Homo sapiens GN=RPL26 PE=4 SV=1
67	9405	tr|J3QRI7|J3QRI7_HUMAN	26.63	1	1		12630	60S ribosomal protein L26 (Fragment) OS=Homo sapiens GN=RPL26 PE=4 SV=1
67	9406	tr|J3QQQ9|J3QQQ9_HUMAN	26.63	1	1		12692	KRAB-A domain-containing protein 2 OS=Homo sapiens GN=KRBA2 PE=4 SV=1
67	9407	tr|J3QQV1|J3QQV1_HUMAN	26.63	1	1		12934	60S ribosomal protein L26 OS=Homo sapiens GN=RPL26 PE=4 SV=1
67	9408	tr|J3QRC4|J3QRC4_HUMAN	26.63	1	1		15759	60S ribosomal protein L26 (Fragment) OS=Homo sapiens GN=RPL26 PE=4 SV=1
52	9429	tr|Q3T976|Q3T976_HUMAN	65.73	2	1		10958	MHC class II antigen (Fragment) OS=Homo sapiens GN=HLA-DRB1 PE=4 SV=1
52	9432	tr|Q95IT4|Q95IT4_HUMAN	65.73	2	1		30028	HLA-DRB1 protein OS=Homo sapiens GN=HLA-DRB1 PE=2 SV=1
76	9437	tr|L0R809|L0R809_HUMAN	30.6	1	1		8712	Alternative protein ADCY1 OS=Homo sapiens GN=ADCY1 PE=4 SV=1
68	12617	tr|D6RI02|D6RI02_HUMAN	25.45	1	1	Oxidation (M)	10615	40S ribosomal protein S3a OS=Homo sapiens GN=RPS3A PE=2 SV=1
55	15008	tr|E9PHM6|E9PHM6_HUMAN	21.93	1	1		624960	Dystonin OS=Homo sapiens GN=DST PE=2 SV=2
61	15035	tr|B7ZLH8|B7ZLH8_HUMAN	24.22	1	1		233818	EVPL protein OS=Homo sapiens GN=EVPL PE=2 SV=1
52	15106	Q15751|HERC1_HUMAN	20.32	1	1		532234	Probable E3 ubiquitin-protein ligase HERC1 OS=Homo sapiens GN=HERC1 PE=1 SV=2
75	15149	tr|J3KQM2|J3KQM2_HUMAN	20.4	1	1		133569	Integrin alpha-11 OS=Homo sapiens GN=ITGA11 PE=3 SV=1
72	16582	Q5CZC0|FSIP2_HUMAN	22.09	1	1		780624	Fibrous sheath-interacting protein 2 OS=Homo sapiens OX=9606 GN=FSIP2 PE=2 SV=4
37	16722	Q5VST9|OBSCN_HUMAN	33.23	1	1		868496	Obscurin OS=Homo sapiens OX=9606 GN=OBSCN PE=1 SV=3
26	18966	Q17RW2|COOA1_HUMAN	53.59	3	2		175496	Collagen alpha-1(XXIV) chain OS=Homo sapiens OX=9606 GN=COL24A1 PE=1 SV=2
92	31445	P11388|TOP2A_HUMAN	20.34	1	1		174384	DNA topoisomerase 2-alpha OS=Homo sapiens OX=9606 GN=TOP2A PE=1 SV=3
82	34352	Q16787|LAMA3_HUMAN	22.2	1	1		366650	Laminin subunit alpha-3 OS=Homo sapiens OX=9606 GN=LAMA3 PE=1 SV=2
59	35694	O15417|TNC18_HUMAN	20.51	1	1		314520	Trinucleotide repeat-containing gene 18 protein OS=Homo sapiens OX=9606 GN=TNRC18 PE=1 SV=3
111	38161	tr|F5H522|F5H522_HUMAN	31.31	2	2		242404	Voltage-dependent L-type calcium channel subunit alpha OS=Homo sapiens OX=9606 GN=CACNA1C PE=1 SV=1
111	38162	tr|A0A0A0MSA1|A0A0A0MSA1_HUMAN	31.31	2	2		243659	Voltage-dependent L-type calcium channel subunit alpha OS=Homo sapiens OX=9606 GN=CACNA1C PE=1 SV=1
111	38163	tr|A0A0A0MR67|A0A0A0MR67_HUMAN	31.31	2	2		243456	Voltage-dependent L-type calcium channel subunit alpha OS=Homo sapiens OX=9606 GN=CACNA1C PE=1 SV=1
111	38164	tr|F5GY28|F5GY28_HUMAN	31.31	2	2		247161	Voltage-dependent L-type calcium channel subunit alpha OS=Homo sapiens OX=9606 GN=CACNA1C PE=1 SV=1
111	38165	tr|E9PDI6|E9PDI6_HUMAN	31.31	2	2		247113	Voltage-dependent L-type calcium channel subunit alpha OS=Homo sapiens OX=9606 GN=CACNA1C PE=1 SV=1
118	38166	sp|Q13936|CAC1C_HUMAN	22	1	1		248974	Voltage-dependent L-type calcium channel subunit alpha-1C OS=Homo sapiens OX=9606 GN=CACNA1C PE=1 SV=4
93	38249	tr|H0Y465|H0Y465_HUMAN	25.23	2	1		281214	Neurofibromin (Fragment) OS=Homo sapiens OX=9606 GN=NF1 PE=1 SV=1
80	38355	tr|A0A1B0GVY1|A0A1B0GVY1_HUMAN	31.54	2	1		140818	E3 ubiquitin-protein ligase NEDD4-like OS=Homo sapiens OX=9606 GN=NEDD4L PE=1 SV=1
67	38364	sp|P52272|HNRPM_HUMAN	26.15	1	1		77516	Heterogeneous nuclear ribonucleoprotein M OS=Homo sapiens OX=9606 GN=HNRNPM PE=1 SV=3
56	38539	tr|A0A0A0MSU2|A0A0A0MSU2_HUMAN	21.63	1	1		111830	Mitotic deacetylase-associated SANT domain protein (Fragment) OS=Homo sapiens OX=9606 GN=MIDEAS PE=1 SV=6
150	38553	tr|A0A3B3ITZ9|A0A3B3ITZ9_HUMAN	21.75	1	1		103523	Thyroid hormone receptor-associated protein 3 OS=Homo sapiens OX=9606 GN=THRAP3 PE=1 SV=1
235	38658	sp|Q9Y6V0|PCLO_HUMAN	23.95	2	1		560707	Protein piccolo OS=Homo sapiens OX=9606 GN=PCLO PE=1 SV=5
35	38677	tr|K7EQL6|K7EQL6_HUMAN	33.25	2	2		143937	Ubiquitin carboxyl-terminal hydrolase 32 OS=Homo sapiens OX=9606 GN=USP32 PE=1 SV=1
35	38696	sp|P35125|UBP6_HUMAN	24.8	1	1		158658	Ubiquitin carboxyl-terminal hydrolase 6 OS=Homo sapiens OX=9606 GN=USP6 PE=1 SV=2
113	38735	sp|Q8NFA0|UBP32_HUMAN	23.52	1	1	Carbamidomethylation	181655	Ubiquitin carboxyl-terminal hydrolase 32 OS=Homo sapiens OX=9606 GN=USP32 PE=1 SV=1
134	38776	sp|A4UGR9|XIRP2_HUMAN	27.85	2	1		382302	Xin actin-binding repeat-containing protein 2 OS=Homo sapiens OX=9606 GN=XIRP2 PE=1 SV=2
38	38784	sp|Q96JG9|ZN469_HUMAN	31.94	2	2		410207	Zinc finger protein 469 OS=Homo sapiens OX=9606 GN=ZNF469 PE=2 SV=3
159	38809	tr|F8W9F9|F8W9F9_HUMAN	27.34	2	2		234378	Serine/threonine-protein kinase WNK2 OS=Homo sapiens OX=9606 GN=WNK2 PE=1 SV=1
39	38827	sp|P01266|THYG_HUMAN	23.35	1	1		304790	Thyroglobulin OS=Homo sapiens OX=9606 GN=TG PE=1 SV=5
23	38831	sp|Q8IVF2|AHNK2_HUMAN	35.33	2	2		616641	Protein AHNAK2 OS=Homo sapiens OX=9606 GN=AHNAK2 PE=1 SV=2
154	38888	tr|A6NGQ3|A6NGQ3_HUMAN	27.88	2	2		973018	Obscurin OS=Homo sapiens OX=9606 GN=OBSCN PE=1 SV=5
25	46619	Q07092|COGA1_HUMAN	32.58	2	1		157751	Collagen alpha-1(XVI) chain OS=Homo sapiens OX=9606 GN=COL16A1 PE=1 SV=2
23	48445	sp|P62805|H4_HUMAN	93.31	4	4		11367	Histone H4 OS=Homo sapiens OX=9606 GN=H4C1 PE=1 SV=2
24	48446	sp|P08727|K1C19_HUMAN	35.38	1	1		44106	Keratin type I cytoskeletal 19 OS=Homo sapiens OX=9606 GN=KRT19 PE=1 SV=4
21	48468	sp|P16401|H15_HUMAN	79.24	4	2		22580	Histone H1.5 OS=Homo sapiens OX=9606 GN=H1-5 PE=1 SV=3
34	48478	tr|A0A494C189|A0A494C189_HUMAN	87.9	4	2		13496	Histone H2A OS=Homo sapiens OX=9606 GN=H2AZ1 PE=1 SV=1
33	48479	sp|Q71UI9|H2AV_HUMAN	79.82	3	2		13509	Histone H2A.V OS=Homo sapiens OX=9606 GN=H2AFV PE=1 SV=3
33	48482	sp|P0C0S5|H2AZ_HUMAN	83.84	4	2		13553	Histone H2A.Z OS=Homo sapiens OX=9606 GN=H2AZ1 PE=1 SV=2
5	48502	sp|P04259|K2C6B_HUMAN	81.07	7	1	Carbamidomethylation	60067	Keratin type II cytoskeletal 6B OS=Homo sapiens OX=9606 GN=KRT6B PE=1 SV=5
65	48528	sp|Q09666|AHNK_HUMAN	23.96	1	1		629114	Neuroblast differentiation-associated protein AHNAK OS=Homo sapiens OX=9606 GN=AHNAK PE=1 SV=2
53	48534	sp|Q04695|K1C17_HUMAN	22.36	1	1		48106	Keratin type I cytoskeletal 17 OS=Homo sapiens OX=9606 GN=KRT17 PE=1 SV=2
15	48539	tr|A0A2R8Y7R2|A0A2R8Y7R2_HUMAN	61.97	1	1		12176	Hemoglobin subunit beta OS=Homo sapiens OX=9606 GN=HBB PE=1 SV=1
15	48541	sp|P68871|HBB_HUMAN	71.03	2	2		15998	Hemoglobin subunit beta OS=Homo sapiens OX=9606 GN=HBB PE=1 SV=2
57	48569	sp|Q5VUA4|ZN318_HUMAN	21.79	1	1		251110	Zinc finger protein 318 OS=Homo sapiens OX=9606 GN=ZNF318 PE=1 SV=2
26	48681	sp|P02545|LMNA_HUMAN	56.6	3	3		74140	Prelamin-A/C OS=Homo sapiens OX=9606 GN=LMNA PE=1 SV=1
22	48705	tr|A0A0G2JIW1|A0A0G2JIW1_HUMAN	74.21	3	3		70109	Heat shock 70 kDa protein 1B OS=Homo sapiens OX=9606 GN=HSPA1B PE=1 SV=1
85	48707	sp|P51991|ROA3_HUMAN	31.14	2	2		39595	Heterogeneous nuclear ribonucleoprotein A3 OS=Homo sapiens OX=9606 GN=HNRNPA3 PE=1 SV=2
65	48759	tr|A0A2R8Y5V9|A0A2R8Y5V9_HUMAN	28.35	1	1	Oxidation (M)	28609	Tropomyosin alpha-4 chain OS=Homo sapiens OX=9606 GN=TPM4 PE=1 SV=1
65	49072	tr|A0A286YES2|A0A286YES2_HUMAN	23.96	1	1		197317	RANBP2-like and GRIP domain-containing protein 1 OS=Homo sapiens OX=9606 GN=RGPD1 PE=4 SV=1
65	49073	tr|A0A1W2PNU4|A0A1W2PNU4_HUMAN	23.96	1	1		197209	RANBP2-like and GRIP domain-containing protein 2 OS=Homo sapiens OX=9606 GN=RGPD2 PE=4 SV=1
65	49074	tr|F8VYC4|F8VYC4_HUMAN	23.96	1	1		197331	RANBP2-like and GRIP domain-containing protein 1 OS=Homo sapiens OX=9606 GN=RGPD1 PE=4 SV=1
11	49240	sp|P14618|KPYM_HUMAN	71.15	3	3	Carbamidomethylation	57937	Pyruvate kinase PKM OS=Homo sapiens OX=9606 GN=PKM PE=1 SV=4
162	49422	sp|O75592|MYCB2_HUMAN	27.63	2	1		513643	E3 ubiquitin-protein ligase MYCBP2 OS=Homo sapiens OX=9606 GN=MYCBP2 PE=1 SV=4
305	49427	tr|A0A0J9YXM6|A0A0J9YXM6_HUMAN	27.24	2	2		211566	WD repeat-containing protein 81 OS=Homo sapiens OX=9606 GN=WDR81 PE=1 SV=1
107	49447	sp|Q07955|SRSF1_HUMAN	27.91	1	1		27745	Serine/arginine-rich splicing factor 1 OS=Homo sapiens OX=9606 GN=SRSF1 PE=1 SV=2
80	50163	tr|C9J813|C9J813_HUMAN	26.5	1	1		54159	Caldesmon (Fragment) OS=Homo sapiens OX=9606 GN=CALD1 PE=1 SV=1
32	50252	sp|P08729|K2C7_HUMAN	31.66	2	2	Mutation	51386	Keratin type II cytoskeletal 7 OS=Homo sapiens OX=9606 GN=KRT7 PE=1 SV=5
80	50273	tr|E9PGZ1|E9PGZ1_HUMAN	26.5	1	1		61706	Caldesmon OS=Homo sapiens OX=9606 GN=CALD1 PE=1 SV=1
44	50337	tr|A0A494C128|A0A494C128_HUMAN	27.06	1	1		53050	Nucleolar protein 56 OS=Homo sapiens OX=9606 GN=NOP56 PE=1 SV=1
85	50346	tr|K7EPU5|K7EPU5_HUMAN	25.96	1	1	Carbamidomethylation	46745	Sprouty-related EVH1 domain-containing protein 3 OS=Homo sapiens OX=9606 GN=SPRED3 PE=4 SV=1
85	50555	tr|A0A024RAC6|A0A024RAC6_HUMAN	21.06	1	1		87230	Elongin-A OS=Homo sapiens OX=9606 GN=ELOA PE=1 SV=1
422	50912	sp|Q5TB80|CE162_HUMAN	27.36	2	1		161942	Centrosomal protein of 162 kDa OS=Homo sapiens OX=9606 GN=CEP162 PE=1 SV=2
77	51147	sp|O14647|CHD2_HUMAN	22.71	1	1		211342	Chromodomain-helicase-DNA-binding protein 2 OS=Homo sapiens OX=9606 GN=CHD2 PE=1 SV=2
65	51360	tr|J3KNE0|J3KNE0_HUMAN	23.96	1	1		197621	RanBP2-like and GRIP domain-containing protein 3 OS=Homo sapiens OX=9606 GN=RGPD3 PE=4 SV=2
43	51407	sp|P47756|CAPZB_HUMAN	23.79	1	1	Carbamidomethylation; Mutation	31350	F-actin-capping protein subunit beta OS=Homo sapiens OX=9606 GN=CAPZB PE=1 SV=4
51	51499	sp|P24821|TENA_HUMAN	26.19	1	1		240851	Tenascin OS=Homo sapiens OX=9606 GN=TNC PE=1 SV=3
116	51500	tr|A0A087X0P0|A0A087X0P0_HUMAN	23.53	1	1		312104	Centromere-associated protein E OS=Homo sapiens OX=9606 GN=CENPE PE=1 SV=1
108	51600	tr|H0YDN1|H0YDN1_HUMAN	22.16	1	1		388036	Plectin OS=Homo sapiens OX=9606 GN=PLEC PE=1 SV=9
165	51710	tr|A0A2R8Y5P9|A0A2R8Y5P9_HUMAN	28.01	2	2		208048	Protein Shroom3 OS=Homo sapiens OX=9606 GN=SHROOM3 PE=1 SV=1
364	51730	tr|M0R300|M0R300_HUMAN	25.45	2	1		234072	Unconventional myosin-IXb (Fragment) OS=Homo sapiens OX=9606 GN=MYO9B PE=1 SV=8
247	51776	sp|Q9NSI6|BRWD1_HUMAN	25.51	2	1	Carbamidomethylation	262934	Bromodomain and WD repeat-containing protein 1 OS=Homo sapiens OX=9606 GN=BRWD1 PE=1 SV=4
51	51786	sp|P12270|TPR_HUMAN	20.07	1	1		267290	Nucleoprotein TPR OS=Homo sapiens OX=9606 GN=TPR PE=1 SV=3
41	51793	sp|O95714|HERC2_HUMAN	30.54	2	1		527234	E3 ubiquitin-protein ligase HERC2 OS=Homo sapiens OX=9606 GN=HERC2 PE=1 SV=2
61	51812	sp|P49327|FAS_HUMAN	30.71	2	1		273424	Fatty acid synthase OS=Homo sapiens OX=9606 GN=FASN PE=1 SV=3
61	51849	tr|A0A087WYF1|A0A087WYF1_HUMAN	28.06	2	1		343418	Laminin subunit alpha-2 OS=Homo sapiens OX=9606 GN=LAMA2 PE=1 SV=1
61	51850	tr|A0A087WX80|A0A087WX80_HUMAN	28.06	2	1		343752	Laminin subunit alpha-2 OS=Homo sapiens OX=9606 GN=LAMA2 PE=1 SV=1
86	51863	sp|O95613|PCNT_HUMAN	21.72	1	1		378039	Pericentrin OS=Homo sapiens OX=9606 GN=PCNT PE=1 SV=4
50	51929	tr|C9JG08|C9JG08_HUMAN	32.36	2	1		598505	Uncharacterized protein C2orf16 OS=Homo sapiens OX=9606 GN=C2orf16 PE=1 SV=2
65	56790	P20908|CO5A1_HUMAN	22.15	1	1		183559	Collagen alpha-1(V) chain OS=Homo sapiens OX=9606 GN=COL5A1 PE=1 SV=3
81	68481	tr|Q60FE2|Q60FE2_HUMAN	25.81	1	1		226530	MYH9 variant protein OS=Homo sapiens GN=MYH9 PE=2 SV=1
29	68566	P08729|K2C7_HUMAN	49.89	2	1		51386	Keratin type II cytoskeletal 7 OS=Homo sapiens GN=KRT7 PE=1 SV=5
65	68627	tr|B2ZZ86|B2ZZ86_HUMAN	22.15	1	1		183589	Collagen type V alpha 1 OS=Homo sapiens GN=COL5A1 PE=2 SV=1
72	68636	tr|F8W6Y7|F8W6Y7_HUMAN	20.95	1	1		247242	Collagen alpha-6(VI) chain OS=Homo sapiens GN=COL6A6 PE=2 SV=1
21	68742	tr|Q59GD4|Q59GD4_HUMAN	21.91	1	1		162771	Collagen type V alpha 3 preproprotein variant (Fragment) OS=Homo sapiens PE=2 SV=1
65	68754	tr|Q59EE7|Q59EE7_HUMAN	22.15	1	1		178516	Pro-alpha-1 type V collagen variant (Fragment) OS=Homo sapiens PE=2 SV=1
7	68795	tr|D6RIA3|D6RIA3_HUMAN	40.58	1	1	Carbamidomethylation	190073	Protein LOC285556 OS=Homo sapiens GN=LOC285556 PE=4 SV=1
82	68926	tr|B0YJ33|B0YJ33_HUMAN	22.2	1	1		190490	Laminin alpha-3 chain variant 2 OS=Homo sapiens GN=LAMA3 PE=4 SV=1
82	68954	tr|B0YJ32|B0YJ32_HUMAN	22.2	1	1		366951	Laminin alpha-3 chain variant 1 OS=Homo sapiens GN=LAMA3 PE=2 SV=1
50	69013	Q7Z333|SETX_HUMAN	32.79	1	1	Carbamidomethylation	302879	Probable helicase senataxin OS=Homo sapiens GN=SETX PE=1 SV=4
103	69159	Q13464|ROCK1_HUMAN	20.82	1	1	Oxidation (M)	158174	Rho-associated protein kinase 1 OS=Homo sapiens GN=ROCK1 PE=1 SV=1
16	69218	tr|Q8TAG3|Q8TAG3_HUMAN	21.31	1	1		127748	SLC4A2 protein OS=Homo sapiens GN=SLC4A2 PE=2 SV=1
16	69219	tr|Q9UEY4|Q9UEY4_HUMAN	21.31	1	1		135578	Anion exchanger 2 type b1 OS=Homo sapiens GN=SLC4A2 PE=4 SV=1
16	69220	tr|Q9UEY5|Q9UEY5_HUMAN	21.31	1	1		136218	Anion exchanger 2 type b2 OS=Homo sapiens GN=SLC4A2 PE=2 SV=1
79	69242	tr|H7C1J8|H7C1J8_HUMAN	20.38	1	1		11298	Heterogeneous nuclear ribonucleoprotein A3 (Fragment) OS=Homo sapiens GN=HNRNPA3 PE=4 SV=1
41	69458	Q9Y4W6|AFG32_HUMAN	25.78	1	1		88584	AFG3-like protein 2 OS=Homo sapiens GN=AFG3L2 PE=1 SV=2
106	69525	tr|F5GZK2|F5GZK2_HUMAN	22.68	1	1		99428	Collagen alpha-1(XXI) chain OS=Homo sapiens GN=COL21A1 PE=2 SV=1
106	69526	tr|B7ZLK3|B7ZLK3_HUMAN	22.68	1	1		99341	COL21A1 protein OS=Homo sapiens GN=COL21A1 PE=2 SV=1
106	69527	Q96P44|COLA1_HUMAN	22.68	1	1		99369	Collagen alpha-1(XXI) chain OS=Homo sapiens GN=COL21A1 PE=2 SV=1
54	69762	tr|D5FZN7|D5FZN7_HUMAN	79.27	2	2		20962	MHC class I antigen (Fragment) OS=Homo sapiens GN=HLA-C PE=3 SV=1
42	69801	tr|P79557|P79557_HUMAN	43.14	1	1		21202	HLA-A (Fragment) OS=Homo sapiens GN=HLA-A PE=2 SV=1
42	69803	tr|D5FUF1|D5FUF1_HUMAN	43.14	1	1		21049	MHC class I antigen (Fragment) OS=Homo sapiens GN=HLA-B PE=3 SV=1
91	70568	tr|B4DLQ0|B4DLQ0_HUMAN	22.57	1	1		78389	cDNA FLJ50985 highly similar to Segment polarity protein dishevelled homologDVL-2 OS=Homo sapiens PE=2 SV=1
39	70922	tr|H3BQZ7|H3BQZ7_HUMAN	24.6	1	1		84692	HCG2044799 OS=Homo sapiens GN=hCG_2044799 PE=4 SV=1
39	70923	Q1KMD3|HNRL2_HUMAN	24.6	1	1		85105	Heterogeneous nuclear ribonucleoprotein U-like protein 2 OS=Homo sapiens GN=HNRNPUL2 PE=1 SV=1
47	71240	tr|Q96IF4|Q96IF4_HUMAN	32.69	1	1	Mutation	52388	Putative uncharacterized protein (Fragment) OS=Homo sapiens PE=2 SV=1
98	71274	P50416|CPT1A_HUMAN	20.12	1	1	Oxidation (M)	88368	Carnitine O-palmitoyltransferase 1 liver isoform OS=Homo sapiens GN=CPT1A PE=1 SV=2
75	71481	tr|B1AKD8|B1AKD8_HUMAN	27.69	1	1		214564	Rootletin (Fragment) OS=Homo sapiens GN=CROCC PE=4 SV=1
91	71496	Q8N766|EMC1_HUMAN	20.66	1	1		111759	ER membrane protein complex subunit 1 OS=Homo sapiens GN=EMC1 PE=1 SV=1
16	72798	tr|J3KNG9|J3KNG9_HUMAN	21.31	1	1		127648	Anion exchange protein 2 OS=Homo sapiens GN=SLC4A2 PE=4 SV=1
16	72799	P04920|B3A2_HUMAN	21.31	1	1		137009	Anion exchange protein 2 OS=Homo sapiens GN=SLC4A2 PE=1 SV=4
72	72854	tr|J3QTJ6|J3QTJ6_HUMAN	22.09	1	1		789902	Fibrous sheath-interacting protein 2 OS=Homo sapiens GN=FSIP2 PE=4 SV=1
60	73055	tr|B0UZ83|B0UZ83_HUMAN	21.2	1	1		192874	Complement C4 beta chain OS=Homo sapiens GN=C4A PE=4 SV=1
76	73097	tr|B3KWS8|B3KWS8_HUMAN	20.73	1	1		44921	cDNA FLJ43750 fis clone TESTI2034767 highly similar to Collagen alpha-1(IX) chain OS=Homo sapiens PE=2 SV=1
68	73102	Q5U651|RAIN_HUMAN	20.97	1	1		103457	Ras-interacting protein 1 OS=Homo sapiens GN=RASIP1 PE=1 SV=1
56	73427	tr|B4DST5|B4DST5_HUMAN	32.67	1	1		164566	Tyrosine-protein phosphatase non-receptor type 23 OS=Homo sapiens GN=PTPN23 PE=2 SV=1
68	73525	Q6P158|DHX57_HUMAN	24.19	1	1		155604	Putative ATP-dependent RNA helicase DHX57 OS=Homo sapiens GN=DHX57 PE=1 SV=2
114	73790	tr|H0YCF5|H0YCF5_HUMAN	20.51	1	1		22495	Mitogen-activated protein kinase kinase kinase 11 (Fragment) OS=Homo sapiens GN=MAP3K11 PE=4 SV=1
28	73933	tr|H0YLW6|H0YLW6_HUMAN	20.28	1	1		38223	SH2 domain-containing adapter protein F OS=Homo sapiens GN=SHF PE=4 SV=1
103	73936	tr|D9ZGF8|D9ZGF8_HUMAN	20.82	1	1	Oxidation (M)	158243	Rho-associated coiled-coil containing protein kinase 1 OS=Homo sapiens GN=ROCK1 PE=2 SV=1
89	74346	tr|E9PHV1|E9PHV1_HUMAN	20.9	1	1		18108	Coiled-coil alpha-helical rod protein 1 (Fragment) OS=Homo sapiens GN=CCHCR1 PE=2 SV=1
37	80349	tr|H7BY31|H7BY31_HUMAN	25.7	1	1		301723	Obscurin OS=Homo sapiens GN=OBSCN PE=4 SV=1
24	80421	tr|B8K2M2|B8K2M2_HUMAN	21.1	1	1		73747	Zinc finger protein 185 variant 692 OS=Homo sapiens GN=ZNF185 PE=2 SV=1
24	80422	tr|F5GXF7|F5GXF7_HUMAN	21.1	1	1		76857	Zinc finger protein 185 OS=Homo sapiens GN=ZNF185 PE=2 SV=1
16	80426	tr|Q6PJY3|Q6PJY3_HUMAN	21.31	1	1		120035	SLC4A2 protein OS=Homo sapiens GN=SLC4A2 PE=2 SV=1
16	80427	tr|Q9UEY6|Q9UEY6_HUMAN	21.31	1	1		136981	Anion exchanger 2 type a OS=Homo sapiens GN=SLC4A2 PE=2 SV=1
16	80428	tr|Q99654|Q99654_HUMAN	21.31	1	1		137009	AE2 anion exchanger OS=Homo sapiens GN=SLC4A2 PE=2 SV=1
16	80429	tr|Q59GF1|Q59GF1_HUMAN	21.31	1	1		137282	Anion exchanger 2 type a variant (Fragment) OS=Homo sapiens PE=2 SV=1
38	80489	P42695|CNDD3_HUMAN	24.45	1	1		168890	Condensin-2 complex subunit D3 OS=Homo sapiens GN=NCAPD3 PE=1 SV=2
44	80596	tr|B4DFC8|B4DFC8_HUMAN	22.25	1	1		81695	cDNA FLJ58795 highly similar to Zinc finger protein 606 OS=Homo sapiens PE=2 SV=1
44	80597	Q8WXB4|ZN606_HUMAN	22.25	1	1		91812	Zinc finger protein 606 OS=Homo sapiens GN=ZNF606 PE=2 SV=1
51	80641	tr|H0YL36|H0YL36_HUMAN	20.67	1	1		78850	Disintegrin and metalloproteinase domain-containing protein 8 OS=Homo sapiens GN=ADAM8 PE=4 SV=1
53	80645	Q504Y2|PKDCC_HUMAN	20.49	1	1		54132	Protein kinase domain-containing protein cytoplasmic OS=Homo sapiens GN=PKDCC PE=2 SV=2
54	80647	B4DX44|ZN736_HUMAN	20.47	1	1		49868	Zinc finger protein 736 OS=Homo sapiens GN=ZNF736 PE=2 SV=2
51	82309	tr|H0YMQ9|H0YMQ9_HUMAN	20.07	1	1		99266	Solute carrier family 12 (Potassium/chloride transporters) member 6 isoform CRA_c OS=Homo sapiens GN=SLC12A6 PE=4 SV=1
84	82435	tr|A8Y988|A8Y988_HUMAN	22.4	1	1		164828	ATP-binding cassette (Sub-family C member 6) OS=Homo sapiens GN=ABCC6 PE=2 SV=1
41	89946	P18206|VINC_HUMAN	36.68	1	1		123799	Vinculin OS=Homo sapiens OX=9606 GN=VCL PE=1 SV=4
87	90744	P35241|RADI_HUMAN	25.21	1	1		68564	Radixin OS=Homo sapiens OX=9606 GN=RDX PE=1 SV=1
60	94516	tr|Q6U2E9|Q6U2E9_HUMAN	21.2	1	1		192750	C4B1 OS=Homo sapiens GN=C4B PE=4 SV=1
87	94830	tr|F5H1A7|F5H1A7_HUMAN	25.21	1	1		52679	Radixin OS=Homo sapiens GN=RDX PE=2 SV=1
86	95054	tr|B1AMJ5|B1AMJ5_HUMAN	21.9	1	1		145592	CDK5 regulatory subunit-associated protein 2 (Fragment) OS=Homo sapiens GN=CDK5RAP2 PE=4 SV=1
58	95102	tr|B1AK51|B1AK51_HUMAN	27.21	1	1		136452	Uncharacterized protein OS=Homo sapiens GN=CHD5 PE=4 SV=1
101	95363	tr|Q6AI59|Q6AI59_HUMAN	21.42	1	1		192923	Putative uncharacterized protein DKFZp781H0795 (Fragment) OS=Homo sapiens GN=DKFZp781H0795 PE=2 SV=1
101	95364	Q8NEV8|EXPH5_HUMAN	21.42	1	1		222517	Exophilin-5 OS=Homo sapiens GN=EXPH5 PE=2 SV=3
56	95817	Q9H3S7|PTN23_HUMAN	32.67	1	1		178972	Tyrosine-protein phosphatase non-receptor type 23 OS=Homo sapiens GN=PTPN23 PE=1 SV=1
69	96371	tr|B7TY16|B7TY16_HUMAN	39.95	1	1		107141	Actinin alpha 1 isoform 3 OS=Homo sapiens GN=ACTN1 PE=2 SV=1
59	98294	tr|H7BZ94|H7BZ94_HUMAN	32.05	1	1		52502	Protein disulfide-isomerase OS=Homo sapiens GN=P4HB PE=3 SV=2
45	98332	tr|A6NLF3|A6NLF3_HUMAN	25.61	1	1		150493	Sickle tail protein homolog OS=Homo sapiens GN=KIAA1217 PE=2 SV=2
14	98368	tr|F8VQY3|F8VQY3_HUMAN	56.87	3	3		19118	Keratin type II cytoskeletal 8 (Fragment) OS=Homo sapiens GN=KRT8 PE=2 SV=1
21	98454	tr|B4E3S1|B4E3S1_HUMAN	74.9	3	3		110911	cDNA FLJ57040 highly similar to Myosin-9 OS=Homo sapiens PE=2 SV=1
41	98489	tr|B3KXA2|B3KXA2_HUMAN	36.68	1	1		110306	cDNA FLJ45031 fis clone BRAWH3018548 highly similar to Vinculin OS=Homo sapiens PE=2 SV=1
89	98552	tr|Q6IAC8|Q6IAC8_HUMAN	20.9	1	1		88655	C6orf18 protein OS=Homo sapiens GN=C6orf18 PE=2 SV=1
86	98592	A8CG34|P121C_HUMAN	30.28	1	1	Oxidation (M)	125059	Nuclear envelope pore membrane protein POM 121C OS=Homo sapiens GN=POM121C PE=1 SV=2
69	98811	tr|B7Z2W3|B7Z2W3_HUMAN	39.95	1	1		67143	cDNA FLJ54432 highly similar to Alpha-actinin-1 OS=Homo sapiens PE=2 SV=1
69	98936	P12814|ACTN1_HUMAN	39.95	1	1		103058	Alpha-actinin-1 OS=Homo sapiens GN=ACTN1 PE=1 SV=2
45	99310	tr|B4DTY7|B4DTY7_HUMAN	25.61	1	1		167981	cDNA FLJ57813 weakly similar to p130Cas-associated protein OS=Homo sapiens PE=2 SV=1
41	99311	tr|B4E3Q9|B4E3Q9_HUMAN	36.68	1	1		100938	cDNA FLJ59659 highly similar to Vinculin OS=Homo sapiens PE=2 SV=1
101	100165	tr|Q149M6|Q149M6_HUMAN	21.42	1	1		222419	Exophilin 5 OS=Homo sapiens GN=EXPH5 PE=2 SV=1
21	110498	tr|Q86XU5|Q86XU5_HUMAN	74.9	3	3		158752	MYH9 protein (Fragment) OS=Homo sapiens GN=MYH9 PE=2 SV=1
21	110499	tr|A8K6E4|A8K6E4_HUMAN	74.9	3	3		116421	cDNA FLJ77145 highly similar to Homo sapiens myosin heavy polypeptide 9 non-muscle (MYH9) mRNA (Fragment) OS=Homo sapiens PE=2 SV=1
36	110502	tr|B4DTN7|B4DTN7_HUMAN	58.66	2	2		70317	cDNA FLJ57198 highly similar to Protein-glutamine gamma-glutamyltransferase 2 (EC 2.3.2.13) OS=Homo sapiens PE=2 SV=1
87	110504	tr|B7Z2S7|B7Z2S7_HUMAN	25.21	1	1		52651	cDNA FLJ58499 highly similar to Radixin OS=Homo sapiens PE=2 SV=1
87	110505	tr|B7Z9U6|B7Z9U6_HUMAN	25.21	1	1		52707	cDNA FLJ78960 highly similar to Radixin OS=Homo sapiens PE=2 SV=1
87	110506	tr|A7YIJ8|A7YIJ8_HUMAN	25.21	1	1		71049	Radixin OS=Homo sapiens GN=RDX PE=2 SV=1
32	110507	tr|Q2TNB3|Q2TNB3_HUMAN	53.71	2	2		27349	Cell migration-inducing protein 22 OS=Homo sapiens PE=2 SV=1
32	110508	tr|Q86SZ7|Q86SZ7_HUMAN	53.71	2	2		27402	Full-length cDNA clone CS0DJ015YJ12 of T cells (Jurkat cell line) of Homo sapiens (human) OS=Homo sapiens GN=PSME2 PE=2 SV=1
32	110509	tr|Q6FHK9|Q6FHK9_HUMAN	53.71	2	2		27432	PSME2 protein OS=Homo sapiens GN=PSME2 PE=2 SV=1
32	110510	Q9UL46|PSME2_HUMAN	53.71	2	2		27402	Proteasome activator complex subunit 2 OS=Homo sapiens GN=PSME2 PE=1 SV=4
87	110512	tr|Q9UJU1|Q9UJU1_HUMAN	25.21	1	1		16302	Cytovillin 2 (Fragment) OS=Homo sapiens GN=VIL2 PE=2 SV=1
87	110513	tr|Q9UJZ2|Q9UJZ2_HUMAN	25.21	1	1		18434	Cytovillin 2 (Fragment) OS=Homo sapiens GN=VIL2 PE=2 SV=1
87	110514	tr|Q9UJZ6|Q9UJZ6_HUMAN	25.21	1	1		19252	Ezrin (Fragment) OS=Homo sapiens PE=2 SV=1
87	110515	tr|Q9UK20|Q9UK20_HUMAN	25.21	1	1		19566	Ezrin (Fragment) OS=Homo sapiens PE=2 SV=2
87	110516	tr|Q6PJT4|Q6PJT4_HUMAN	25.21	1	1		38827	MSN protein (Fragment) OS=Homo sapiens GN=MSN PE=2 SV=1
87	110517	tr|Q6PKD3|Q6PKD3_HUMAN	25.21	1	1		40397	RDX protein (Fragment) OS=Homo sapiens GN=RDX PE=2 SV=1
87	110518	tr|Q05CU6|Q05CU6_HUMAN	25.21	1	1		40725	RDX protein (Fragment) OS=Homo sapiens GN=RDX PE=2 SV=1
87	110519	tr|B7Z437|B7Z437_HUMAN	25.21	1	1		51267	cDNA FLJ53435 highly similar to Ezrin OS=Homo sapiens PE=2 SV=1
87	110520	tr|B7Z5V2|B7Z5V2_HUMAN	25.21	1	1		65569	cDNA FLJ54141 highly similar to Ezrin OS=Homo sapiens PE=2 SV=1
87	110521	tr|E7EQR4|E7EQR4_HUMAN	25.21	1	1		65579	Ezrin OS=Homo sapiens GN=EZR PE=2 SV=2
87	110522	P26038|MOES_HUMAN	25.21	1	1		67820	Moesin OS=Homo sapiens GN=MSN PE=1 SV=3
87	110523	P15311|EZRI_HUMAN	25.21	1	1		69413	Ezrin OS=Homo sapiens GN=EZR PE=1 SV=4
87	110524	tr|B2R6J2|B2R6J2_HUMAN	25.21	1	1		69401	cDNA FLJ92973 highly similar to Homo sapiens villin 2 (ezrin) (VIL2) mRNA OS=Homo sapiens PE=2 SV=1
87	110525	tr|Q6NUR7|Q6NUR7_HUMAN	25.21	1	1		69242	Ezrin OS=Homo sapiens GN=EZR PE=2 SV=1
87	110526	tr|J7M2B1|J7M2B1_HUMAN	25.21	1	1		98949	Tyrosine-protein kinase receptor OS=Homo sapiens GN=EZR-ROS1 PE=2 SV=1
87	110530	tr|Q9UJZ8|Q9UJZ8_HUMAN	25.21	1	1		19042	Ezrin (Fragment) OS=Homo sapiens PE=2 SV=1
68	110535	tr|Q5R209|Q5R209_HUMAN	27.22	1	1	Carbamidomethylation	138403	Carbamoylphosphate synthetase I OS=Homo sapiens GN=CPS1 PE=2 SV=1
89	110537	tr|F8WCJ1|F8WCJ1_HUMAN	27.97	1	1		11688	Eukaryotic translation initiation factor 5A-2 OS=Homo sapiens GN=EIF5A2 PE=2 SV=1
89	110538	tr|C9J4W5|C9J4W5_HUMAN	27.97	1	1		12821	Eukaryotic translation initiation factor 5A-2 (Fragment) OS=Homo sapiens GN=EIF5A2 PE=2 SV=1
89	110539	tr|I3L397|I3L397_HUMAN	27.97	1	1		16118	Eukaryotic translation initiation factor 5A-1 (Fragment) OS=Homo sapiens GN=EIF5A PE=4 SV=1
89	110540	P63241|IF5A1_HUMAN	27.97	1	1		16832	Eukaryotic translation initiation factor 5A-1 OS=Homo sapiens GN=EIF5A PE=1 SV=2
89	110541	Q6IS14|IF5AL_HUMAN	27.97	1	1		16773	Eukaryotic translation initiation factor 5A-1-like OS=Homo sapiens GN=EIF5AL1 PE=1 SV=2
89	110542	tr|I3L504|I3L504_HUMAN	27.97	1	1		20504	Eukaryotic translation initiation factor 5A-1 OS=Homo sapiens GN=EIF5A PE=4 SV=1
57	110614	O43424|GRID2_HUMAN	32.65	1	1		113356	Glutamate receptor ionotropic delta-2 OS=Homo sapiens GN=GRID2 PE=2 SV=2
99	111004	tr|K7EQZ1|K7EQZ1_HUMAN	21.86	1	1	Oxidation (M)	28652	CpG-binding protein (Fragment) OS=Homo sapiens GN=CXXC1 PE=4 SV=1
104	111012	tr|Q7Z3E9|Q7Z3E9_HUMAN	21.9	1	1		93076	Putative uncharacterized protein DKFZp686J1286 (Fragment) OS=Homo sapiens GN=DKFZp686J1286 PE=2 SV=1
60	111026	tr|Q9UNU2|Q9UNU2_HUMAN	21.2	1	1		38138	Complement protein C4B frameshift mutant (Fragment) OS=Homo sapiens GN=C4B PE=4 SV=1
75	111233	Q9UKX5|ITA11_HUMAN	20.4	1	1		133470	Integrin alpha-11 OS=Homo sapiens GN=ITGA11 PE=1 SV=2
75	111234	tr|A8K8T0|A8K8T0_HUMAN	20.4	1	1		133411	cDNA FLJ78760 highly similar to Homo sapiens integrin alpha 11 (ITGA11) transcript variant 1 mRNA OS=Homo sapiens PE=2 SV=1
60	111365	P0C0L5|CO4B_HUMAN	21.2	1	1		192792	Complement C4-B OS=Homo sapiens GN=C4B PE=1 SV=1
61	111803	tr|H0YMN5|H0YMN5_HUMAN	28.94	2	1		127966	DNA helicase INO80 OS=Homo sapiens GN=INO80 PE=4 SV=1
62	111811	tr|J3KN33|J3KN33_HUMAN	23.62	1	1		161540	Centlein OS=Homo sapiens GN=CNTLN PE=4 SV=1
100	112782	tr|G8JLD6|G8JLD6_HUMAN	30.89	1	1		37548	Prickle-like protein 4 OS=Homo sapiens GN=PRICKLE4 PE=4 SV=1
45	147284	tr|B7ZM29|B7ZM29_HUMAN	25.61	1	1		147440	KIAA1217 protein OS=Homo sapiens GN=KIAA1217 PE=2 SV=1
73	147703	tr|H0Y8D6|H0Y8D6_HUMAN	37.22	3	1		159971	ATP-binding cassette sub-family A member 2 (Fragment) OS=Homo sapiens GN=ABCA2 PE=3 SV=1
42	148193	tr|F2VNE8|F2VNE8_HUMAN	43.14	1	1		21109	MHC class I antigen (Fragment) OS=Homo sapiens GN=HLA-A PE=3 SV=1
27	149598	tr|G3V1Y7|G3V1Y7_HUMAN	31.53	1	1		13159	Myosin light polypeptide 6 OS=Homo sapiens GN=MYL6 PE=2 SV=1
27	149599	P60660|MYL6_HUMAN	31.53	1	1		16930	Myosin light polypeptide 6 OS=Homo sapiens GN=MYL6 PE=1 SV=2
27	149600	tr|J3KND3|J3KND3_HUMAN	31.53	1	1		17058	Myosin light polypeptide 6 OS=Homo sapiens GN=MYL6 PE=4 SV=1
41	149601	tr|Q5JQ13|Q5JQ13_HUMAN	36.68	1	1		87444	Vinculin (Fragment) OS=Homo sapiens GN=VCL PE=4 SV=1
27	149604	tr|F8VZU9|F8VZU9_HUMAN	31.53	1	1		11677	Myosin light polypeptide 6 OS=Homo sapiens GN=MYL6 PE=2 SV=1
27	149605	tr|Q6IBG5|Q6IBG5_HUMAN	31.53	1	1		12970	MYL6 protein OS=Homo sapiens GN=MYL6 PE=2 SV=1
27	149606	tr|F8VPF3|F8VPF3_HUMAN	31.53	1	1		14436	Myosin light polypeptide 6 (Fragment) OS=Homo sapiens GN=MYL6 PE=2 SV=1
27	149607	tr|F8W1R7|F8W1R7_HUMAN	31.53	1	1		16290	Myosin light polypeptide 6 OS=Homo sapiens GN=MYL6 PE=2 SV=1
27	149608	tr|G8JLA2|G8JLA2_HUMAN	31.53	1	1		17089	Myosin light polypeptide 6 OS=Homo sapiens GN=MYL6 PE=4 SV=1
27	149609	tr|G3V1V0|G3V1V0_HUMAN	31.53	1	1		18037	Myosin light polypeptide 6 OS=Homo sapiens GN=MYL6 PE=2 SV=1
27	149610	tr|F8W180|F8W180_HUMAN	31.53	1	1		22094	Myosin light polypeptide 6 OS=Homo sapiens GN=MYL6 PE=2 SV=1
27	149611	tr|B7Z6Z4|B7Z6Z4_HUMAN	31.53	1	1		26707	Myosin light polypeptide 6 OS=Homo sapiens GN=MYL6 PE=2 SV=1
56	149613	tr|B4DJ21|B4DJ21_HUMAN	32.67	1	1		100717	cDNA FLJ53444 highly similar to Tyrosine-protein phosphatase non-receptor type 23 (EC 3.1.3.48) OS=Homo sapiens PE=2 SV=1
45	149615	tr|B9EGK4|B9EGK4_HUMAN	25.61	1	1		150523	KIAA1217 protein OS=Homo sapiens GN=KIAA1217 PE=2 SV=1
27	149616	tr|F8VXL3|F8VXL3_HUMAN	31.53	1	1		5247	Myosin light polypeptide 6 OS=Homo sapiens GN=MYL6 PE=2 SV=1
27	149617	tr|H0YI43|H0YI43_HUMAN	31.53	1	1		9258	Myosin light polypeptide 6 (Fragment) OS=Homo sapiens GN=MYL6 PE=4 SV=1
45	149623	tr|Q5T5P1|Q5T5P1_HUMAN	25.61	1	1		103666	Sickle tail protein homolog (Fragment) OS=Homo sapiens GN=KIAA1217 PE=4 SV=2
60	149624	tr|B7Z9R3|B7Z9R3_HUMAN	25.67	1	1		63759	cDNA FLJ78927 highly similar to Zinc finger protein 582 OS=Homo sapiens PE=2 SV=1
80	149627	tr|B4E3I0|B4E3I0_HUMAN	26.5	1	1		35382	cDNA FLJ55017 highly similar to Caldesmon OS=Homo sapiens PE=2 SV=1
80	149628	tr|Q9NYG1|Q9NYG1_HUMAN	26.5	1	1		56462	Caldesmon 1 isoform CRA_b OS=Homo sapiens GN=CALD1 PE=2 SV=3
80	149629	tr|B4DPW5|B4DPW5_HUMAN	26.5	1	1		57414	cDNA FLJ59374 highly similar to Homo sapiens caldesmon 1 (CALD1) transcript variant 2 mRNA OS=Homo sapiens PE=2 SV=1
80	149630	tr|F5H1Z9|F5H1Z9_HUMAN	26.5	1	1		62712	Caldesmon OS=Homo sapiens GN=CALD1 PE=2 SV=1
80	149631	tr|B7Z6G4|B7Z6G4_HUMAN	26.5	1	1		62742	cDNA FLJ53193 highly similar to Homo sapiens caldesmon 1 (CALD1) transcript variant 5 mRNA OS=Homo sapiens PE=2 SV=1
80	149632	tr|E7EX44|E7EX44_HUMAN	26.5	1	1		64169	Caldesmon OS=Homo sapiens GN=CALD1 PE=2 SV=1
80	149633	Q05682|CALD1_HUMAN	26.5	1	1		93231	Caldesmon OS=Homo sapiens GN=CALD1 PE=1 SV=3
63	149636	tr|B4DUX6|B4DUX6_HUMAN	22.95	1	1		31055	Calponin-1 OS=Homo sapiens GN=CNN1 PE=2 SV=1
63	149637	P51911|CNN1_HUMAN	22.95	1	1		33170	Calponin-1 OS=Homo sapiens GN=CNN1 PE=1 SV=2
63	149638	tr|Q53FP8|Q53FP8_HUMAN	22.95	1	1		33185	Calponin 1 basic smooth muscle variant (Fragment) OS=Homo sapiens PE=2 SV=1
48	149642	tr|A8K4Z6|A8K4Z6_HUMAN	20.82	1	1		70521	cDNA FLJ76180 OS=Homo sapiens PE=2 SV=1
48	149643	Q9BRD0|BUD13_HUMAN	20.82	1	1		70521	BUD13 homolog OS=Homo sapiens GN=BUD13 PE=1 SV=1
83	149661	tr|B9EIL0|B9EIL0_HUMAN	22.85	1	1		31587	Putative uncharacterized protein OS=Homo sapiens PE=2 SV=1
75	149715	tr|B4E3M0|B4E3M0_HUMAN	20.4	1	1		72026	cDNA FLJ58807 highly similar to Integrin alpha-11 OS=Homo sapiens PE=2 SV=1
90	149736	Q68DN1|CB016_HUMAN	20.88	1	1		224320	Uncharacterized protein C2orf16 OS=Homo sapiens GN=C2orf16 PE=2 SV=3
89	149737	tr|E7EPK4|E7EPK4_HUMAN	20.9	1	1		21591	Coiled-coil alpha-helical rod protein 1 (Fragment) OS=Homo sapiens GN=CCHCR1 PE=2 SV=1
48	149738	tr|H7C462|H7C462_HUMAN	20.82	1	1		13017	BUD13 homolog (Fragment) OS=Homo sapiens GN=BUD13 PE=4 SV=1
89	149739	tr|Q0EFB6|Q0EFB6_HUMAN	20.9	1	1		85869	HCR protein OS=Homo sapiens GN=HCR PE=2 SV=1
89	149740	tr|A8K081|A8K081_HUMAN	20.9	1	1		88738	cDNA FLJ78692 OS=Homo sapiens PE=2 SV=1
89	149741	tr|Q769H0|Q769H0_HUMAN	20.9	1	1		88617	StAR protein binding protein OS=Homo sapiens GN=SBP 1b PE=2 SV=1
89	149742	tr|E9PE84|E9PE84_HUMAN	20.9	1	1		95145	Coiled-coil alpha-helical rod protein 1 OS=Homo sapiens GN=CCHCR1 PE=2 SV=1
86	150356	tr|Q5JTU8|Q5JTU8_HUMAN	21.9	1	1		102323	CDK5 regulatory subunit-associated protein 2 (Fragment) OS=Homo sapiens GN=CDK5RAP2 PE=4 SV=1
77	151137	tr|H3BR07|H3BR07_HUMAN	42.99	1	1	Mutation	8036	Activating transcription factor 7-interacting protein 2 (Fragment) OS=Homo sapiens GN=ATF7IP2 PE=4 SV=1
77	151138	tr|H3BUP1|H3BUP1_HUMAN	42.99	1	1	Mutation	9082	Activating transcription factor 7-interacting protein 2 (Fragment) OS=Homo sapiens GN=ATF7IP2 PE=4 SV=1
77	151153	tr|H3BPC9|H3BPC9_HUMAN	42.99	1	1	Mutation	44592	Activating transcription factor 7-interacting protein 2 OS=Homo sapiens GN=ATF7IP2 PE=4 SV=1
77	151155	tr|B4DR02|B4DR02_HUMAN	42.99	1	1	Mutation	47801	cDNA FLJ61338 highly similar to Homo sapiens activating transcription factor 7 interacting protein 2 (ATF7IP2) mRNA OS=Homo sapiens PE=2 SV=1
77	151156	tr|F5GY73|F5GY73_HUMAN	42.99	1	1	Mutation	47902	Activating transcription factor 7-interacting protein 2 OS=Homo sapiens GN=ATF7IP2 PE=2 SV=1
77	151167	Q5U623|MCAF2_HUMAN	42.99	1	1	Mutation	75764	Activating transcription factor 7-interacting protein 2 OS=Homo sapiens GN=ATF7IP2 PE=2 SV=2
51	151457	tr|E7EQV3|E7EQV3_HUMAN	20.07	1	1		65748	Polyadenylate-binding protein 1 OS=Homo sapiens GN=PABPC1 PE=2 SV=1
55	172139	tr|F5H7K6|F5H7K6_HUMAN	45.65	2	2		59935	Polyubiquitin-C OS=Homo sapiens GN=UBC PE=2 SV=1
32	172338	tr|J3KPI6|J3KPI6_HUMAN	28.8	2	1		119380	Mitogen-activated protein kinase kinase kinase 9 OS=Homo sapiens GN=MAP3K9 PE=4 SV=1
116	172802	tr|A8K6U7|A8K6U7_HUMAN	20.01	1	1		95679	cDNA FLJ78252 highly similar to Homo sapiens heterogeneous nuclear ribonucleoprotein U-like 1 (HNRPUL1) transcript variant 1 mRNA OS=Homo sapiens PE=2 SV=1
58	184717	tr|F1T0E5|F1T0E5_HUMAN	21.39	1	1		152001	Calcium-dependent secretion activator 1 OS=Homo sapiens GN=CADPS PE=2 SV=1
48	187008	tr|B7Z565|B7Z565_HUMAN	48.13	2	2		94784	cDNA FLJ54739 highly similar to Alpha-actinin-1 OS=Homo sapiens PE=2 SV=1
86	187020	Q96HA1|P121A_HUMAN	30.28	1	1	Oxidation (M)	127720	Nuclear envelope pore membrane protein POM 121 OS=Homo sapiens GN=POM121 PE=1 SV=2
102	187026	tr|J3KSJ6|J3KSJ6_HUMAN	25.04	1	1		8691	Uncharacterized protein C1orf159 (Fragment) OS=Homo sapiens GN=C1orf159 PE=4 SV=1
79	187049	Q5THR3|EFCB6_HUMAN	20.8	1	1		172929	EF-hand calcium-binding domain-containing protein 6 OS=Homo sapiens GN=EFCAB6 PE=1 SV=1
103	187072	Q8IZ52|CHSS2_HUMAN	23.39	1	1		85467	Chondroitin sulfate synthase 2 OS=Homo sapiens GN=CHPF PE=1 SV=2
82	187083	tr|Q6VU69|Q6VU69_HUMAN	22.2	1	1		184053	Laminin alpha 3 splice variant a OS=Homo sapiens GN=LAMA3 PE=2 SV=1
148	188527	tr|B7Z7Y1|B7Z7Y1_HUMAN	21.4	1	1		136844	Rap guanine nucleotide exchange factor 6 OS=Homo sapiens GN=RAPGEF6 PE=2 SV=1
52	189263	tr|K7ESB7|K7ESB7_HUMAN	22.38	1	1		148800	Dedicator of cytokinesis protein 6 (Fragment) OS=Homo sapiens GN=DOCK6 PE=4 SV=1
44	200185	tr|B0V1E4|B0V1E4_HUMAN	36.31	1	1		25897	HLA class II histocompatibility antigen DP beta 1 chain OS=Homo sapiens GN=HLA-DPB1 PE=4 SV=1
42	200338	tr|E0WBT2|E0WBT2_HUMAN	43.14	1	1		20925	MHC class I antigen (Fragment) OS=Homo sapiens GN=HLA-A PE=3 SV=1
56	204004	tr|F8W079|F8W079_HUMAN	45.72	1	1	Oxidation (M)	30170	ATP synthase subunit beta mitochondrial (Fragment) OS=Homo sapiens GN=ATP5B PE=2 SV=1
42	204030	tr|D7NP79|D7NP79_HUMAN	43.14	1	1		21034	MHC class I antigen (Fragment) OS=Homo sapiens GN=HLA-A PE=3 SV=1
42	204031	tr|D2U7E1|D2U7E1_HUMAN	43.14	1	1		20985	MHC class I antigen (Fragment) OS=Homo sapiens GN=HLA-B PE=3 SV=1
42	204032	tr|C9WET6|C9WET6_HUMAN	43.14	1	1		21275	MHC class I antigen (Fragment) OS=Homo sapiens GN=HLA-C PE=3 SV=1
42	204033	tr|Q2LDE3|Q2LDE3_HUMAN	43.14	1	1		21077	MHC class I antigen (Fragment) OS=Homo sapiens GN=HLA-B PE=2 SV=1
42	204034	tr|D7NNM4|D7NNM4_HUMAN	43.14	1	1		21112	MHC class I antigen (Fragment) OS=Homo sapiens GN=HLA-A PE=3 SV=1
42	204035	tr|C6K4L8|C6K4L8_HUMAN	43.14	1	1		21219	MHC class I antigen (Fragment) OS=Homo sapiens GN=HLA-C PE=3 SV=1
42	204036	tr|P79503|P79503_HUMAN	43.14	1	1		21036	HLA-B (Fragment) OS=Homo sapiens GN=HLA-B PE=3 SV=1
42	204037	tr|I6TRV7|I6TRV7_HUMAN	43.14	1	1		20962	MHC class I antigen (Fragment) OS=Homo sapiens GN=HLA-A PE=3 SV=1
42	204038	tr|C0KK04|C0KK04_HUMAN	43.14	1	1		21245	MHC class I antigen (Fragment) OS=Homo sapiens GN=HLA-C PE=3 SV=1
42	204039	tr|I2B2Y2|I2B2Y2_HUMAN	43.14	1	1		21092	MHC class I antigen (Fragment) OS=Homo sapiens GN=HLA-B PE=3 SV=1
42	204040	tr|Q4L1J6|Q4L1J6_HUMAN	43.14	1	1		21072	MHC class I antigen (Fragment) OS=Homo sapiens GN=HLA-B PE=2 SV=1
42	204041	tr|D3U754|D3U754_HUMAN	43.14	1	1		20962	MHC class I antigen (Fragment) OS=Homo sapiens GN=HLA-C PE=3 SV=1
42	204042	tr|D3U422|D3U422_HUMAN	43.14	1	1		21127	MHC class I antigen (Fragment) OS=Homo sapiens GN=HLA-A PE=3 SV=1
42	204043	tr|F1AQR8|F1AQR8_HUMAN	43.14	1	1		21245	MHC class I antigen (Fragment) OS=Homo sapiens GN=HLA-C PE=3 SV=1
42	204044	tr|F8RHI1|F8RHI1_HUMAN	43.14	1	1		21077	MHC class I antigen (Fragment) OS=Homo sapiens GN=HLA-C PE=3 SV=1
42	204045	tr|A7WPI6|A7WPI6_HUMAN	43.14	1	1		20789	MHC class I antigen (Fragment) OS=Homo sapiens GN=HLA-B PE=3 SV=1
42	204046	tr|F8SKU6|F8SKU6_HUMAN	43.14	1	1		20987	MHC class I antigen (Fragment) OS=Homo sapiens GN=HLA-A PE=3 SV=1
42	204047	tr|D4HP80|D4HP80_HUMAN	43.14	1	1		21063	MHC class I antigen (Fragment) OS=Homo sapiens GN=HLA-B PE=3 SV=1
42	204048	tr|Q9TPR7|Q9TPR7_HUMAN	43.14	1	1		21221	MHC class I antigen (Fragment) OS=Homo sapiens GN=HLA-A PE=2 SV=1
42	204049	tr|Q3MQ00|Q3MQ00_HUMAN	43.14	1	1		21002	MHC class I antigen (Fragment) OS=Homo sapiens GN=HLA-B PE=3 SV=1
42	204050	tr|F8RHD3|F8RHD3_HUMAN	43.14	1	1		21085	MHC class I antigen (Fragment) OS=Homo sapiens GN=HLA-A PE=3 SV=1
42	204051	tr|I3QHQ0|I3QHQ0_HUMAN	43.14	1	1		21071	MHC class I antigen (Fragment) OS=Homo sapiens GN=HLA-A PE=3 SV=1
42	204052	tr|G3DR80|G3DR80_HUMAN	43.14	1	1		20939	MHC class I antigen (Fragment) OS=Homo sapiens GN=HLA-A PE=3 SV=1
42	204053	tr|D5FHH9|D5FHH9_HUMAN	43.14	1	1		21078	MHC class I antigen (Fragment) OS=Homo sapiens GN=HLA-A PE=3 SV=1
42	204054	tr|G0ZMG5|G0ZMG5_HUMAN	43.14	1	1		21184	MHC class I antigen (Fragment) OS=Homo sapiens GN=HLA-A PE=3 SV=1
42	204055	tr|D7NPN4|D7NPN4_HUMAN	43.14	1	1		20963	MHC class I antigen (Fragment) OS=Homo sapiens GN=HLA-B PE=3 SV=1
42	204056	tr|F2VYJ3|F2VYJ3_HUMAN	43.14	1	1		21079	MHC class I antigen (Fragment) OS=Homo sapiens GN=HLA-B PE=3 SV=1
42	204057	tr|F8R8H5|F8R8H5_HUMAN	43.14	1	1		20851	MHC class I antigen (Fragment) OS=Homo sapiens GN=HLA-A PE=3 SV=1
42	204058	tr|F1C3H4|F1C3H4_HUMAN	43.14	1	1		20976	MHC class I antigen (Fragment) OS=Homo sapiens GN=HLA-B PE=3 SV=1
42	204059	tr|D4IH41|D4IH41_HUMAN	43.14	1	1		21093	MHC class I antigen (Fragment) OS=Homo sapiens GN=HLA-B PE=3 SV=2
42	204060	tr|D2DKN2|D2DKN2_HUMAN	43.14	1	1		20789	MHC class I antigen (Fragment) OS=Homo sapiens GN=HLA-B PE=3 SV=1
42	204061	tr|I6NN70|I6NN70_HUMAN	43.14	1	1		21115	MHC class I antigen (Fragment) OS=Homo sapiens GN=HLA-A PE=3 SV=1
42	204062	tr|G4XFZ6|G4XFZ6_HUMAN	43.14	1	1		21069	MHC class I antigen (Fragment) OS=Homo sapiens GN=HLA-A PE=2 SV=1
42	204063	tr|G1EPR6|G1EPR6_HUMAN	43.14	1	1		21031	MHC class I antigen (Fragment) OS=Homo sapiens GN=HLA-B PE=3 SV=1
42	204064	tr|F8SY75|F8SY75_HUMAN	43.14	1	1		21022	MHC class I antigen (Fragment) OS=Homo sapiens GN=HLA-Cw PE=3 SV=1
42	204065	tr|F2X8C1|F2X8C1_HUMAN	43.14	1	1		21228	MHC class I antigen (Fragment) OS=Homo sapiens GN=HLA-A PE=3 SV=1
42	204066	tr|K7P580|K7P580_HUMAN	43.14	1	1		21090	MHC class I antigen (Fragment) OS=Homo sapiens GN=HLA-C PE=3 SV=1
42	204067	tr|F2VND2|F2VND2_HUMAN	43.14	1	1		20929	MHC class I antigen (Fragment) OS=Homo sapiens GN=HLA-A PE=3 SV=1
42	204068	tr|Q2L9H3|Q2L9H3_HUMAN	43.14	1	1		21105	MHC class I antigen (Fragment) OS=Homo sapiens GN=HLA-A PE=3 SV=1
42	204069	tr|L0BX38|L0BX38_HUMAN	43.14	1	1		20950	MHC class I antigen (Fragment) OS=Homo sapiens GN=HLA-A PE=4 SV=1
42	204070	tr|J7FNZ6|J7FNZ6_HUMAN	43.14	1	1		21283	MHC class I antigen (Fragment) OS=Homo sapiens GN=HLA-A PE=3 SV=1
42	204071	tr|D3U3P3|D3U3P3_HUMAN	43.14	1	1		20900	MHC class I antigen (Fragment) OS=Homo sapiens GN=HLA-C PE=3 SV=1
42	204072	tr|D6MKV8|D6MKV8_HUMAN	43.14	1	1		21028	MHC class I antigen (Fragment) OS=Homo sapiens GN=HLA-C PE=3 SV=1
42	204073	tr|C9WCS6|C9WCS6_HUMAN	43.14	1	1		21181	MHC class I antigen (Fragment) OS=Homo sapiens GN=HLA-B PE=3 SV=1
42	204074	tr|H6UV81|H6UV81_HUMAN	43.14	1	1		21116	MHC class I antigen (Fragment) OS=Homo sapiens GN=HLA-C PE=3 SV=1
42	204075	tr|F8RHF1|F8RHF1_HUMAN	43.14	1	1		21079	MHC class I antigen (Fragment) OS=Homo sapiens GN=HLA-B PE=3 SV=1
42	204076	tr|F2VNU1|F2VNU1_HUMAN	43.14	1	1		21007	MHC class I antigen (Fragment) OS=Homo sapiens GN=HLA-C PE=3 SV=1
42	204077	tr|C9WCZ2|C9WCZ2_HUMAN	43.14	1	1		21075	MHC class I antigen (Fragment) OS=Homo sapiens GN=HLA-B PE=3 SV=1
42	204078	tr|E2DH83|E2DH83_HUMAN	43.14	1	1		20925	MHC class I antigen (Fragment) OS=Homo sapiens GN=HLA-A PE=3 SV=1
42	204079	tr|E2DH87|E2DH87_HUMAN	43.14	1	1		21142	MHC class I antigen (Fragment) OS=Homo sapiens GN=HLA-B PE=3 SV=1
42	204080	tr|G1EP24|G1EP24_HUMAN	43.14	1	1		21091	MHC class I antigen (Fragment) OS=Homo sapiens GN=HLA-A PE=3 SV=1
42	204081	tr|K7P5N3|K7P5N3_HUMAN	43.14	1	1		21160	MHC class I antigen (Fragment) OS=Homo sapiens GN=HLA-C PE=3 SV=1
42	204082	tr|E8ZF54|E8ZF54_HUMAN	43.14	1	1		20973	MHC class I antigen (Fragment) OS=Homo sapiens GN=HLA-A PE=3 SV=1
42	204083	tr|D9U3H3|D9U3H3_HUMAN	43.14	1	1		21017	MHC class I antigen (Fragment) OS=Homo sapiens GN=HLA-B PE=3 SV=1
42	204084	tr|E3SWK4|E3SWK4_HUMAN	43.14	1	1		21219	MHC class I antigen (Fragment) OS=Homo sapiens GN=HLA-C PE=3 SV=1
42	204085	tr|D3G9J5|D3G9J5_HUMAN	43.14	1	1		21115	MHC class I antigen (Fragment) OS=Homo sapiens GN=HLA-B PE=3 SV=1
42	204086	tr|B8Y6A5|B8Y6A5_HUMAN	43.14	1	1		21143	MHC class I antigen (Fragment) OS=Homo sapiens GN=HLA-A PE=3 SV=1
42	204087	tr|H6A2D1|H6A2D1_HUMAN	43.14	1	1		21006	MHC class I antigen (Fragment) OS=Homo sapiens GN=HLA-A PE=3 SV=1
42	204088	tr|F4YU67|F4YU67_HUMAN	43.14	1	1		20864	MHC class I antigen (Fragment) OS=Homo sapiens GN=HLA-B PE=3 SV=1
42	204089	tr|G9HW24|G9HW24_HUMAN	43.14	1	1		21001	MHC class I antigen (Fragment) OS=Homo sapiens GN=HLA-A PE=3 SV=1
42	204090	tr|D7NQT7|D7NQT7_HUMAN	43.14	1	1		20923	MHC class I antigen (Fragment) OS=Homo sapiens GN=HLA-A PE=3 SV=1
42	204091	tr|C7FDU9|C7FDU9_HUMAN	43.14	1	1		21231	MHC class I antigen (Fragment) OS=Homo sapiens GN=HLA-C PE=3 SV=1
42	204092	tr|J7JGS9|J7JGS9_HUMAN	43.14	1	1		21015	MHC class I antigen (Fragment) OS=Homo sapiens GN=HLA-B PE=3 SV=1
42	204093	tr|I6R6Z3|I6R6Z3_HUMAN	43.14	1	1		21071	MHC class I antigen (Fragment) OS=Homo sapiens GN=HLA-A PE=3 SV=1
42	204094	tr|H2BE76|H2BE76_HUMAN	43.14	1	1		20993	MHC class I antigen (Fragment) OS=Homo sapiens GN=HLA-A PE=3 SV=1
42	204095	tr|F1AQP3|F1AQP3_HUMAN	43.14	1	1		21103	MHC class I antigen (Fragment) OS=Homo sapiens GN=HLA-B PE=3 SV=1
42	204096	tr|E0YTH7|E0YTH7_HUMAN	43.14	1	1		21143	MHC class I antigen (Fragment) OS=Homo sapiens GN=HLA-A PE=3 SV=1
42	204097	tr|Q45FZ2|Q45FZ2_HUMAN	43.14	1	1		20976	MHC class I antigen (Fragment) OS=Homo sapiens GN=HLA-Cw PE=2 SV=1
42	204098	tr|Q3BK09|Q3BK09_HUMAN	43.14	1	1		21129	MHC class I antigen (Fragment) OS=Homo sapiens GN=HLA-A PE=2 SV=1
42	204099	tr|F1AQN9|F1AQN9_HUMAN	43.14	1	1		21129	MHC class I antigen (Fragment) OS=Homo sapiens GN=HLA-B PE=3 SV=1
42	204100	tr|D6MLF9|D6MLF9_HUMAN	43.14	1	1		21119	MHC class I antigen (Fragment) OS=Homo sapiens GN=HLA-C PE=3 SV=1
42	204101	tr|G1ENR2|G1ENR2_HUMAN	43.14	1	1		21230	MHC class I antigen (Fragment) OS=Homo sapiens GN=HLA-C PE=3 SV=1
42	204102	tr|Q5K018|Q5K018_HUMAN	43.14	1	1		23898	MHC class I antigen (Fragment) OS=Homo sapiens GN=HLA-C PE=3 SV=2
42	204103	tr|O19633|O19633_HUMAN	43.14	1	1		24294	HLA-A26 protein OS=Homo sapiens GN=HLA-A26 PE=3 SV=1
42	204104	tr|Q50I06|Q50I06_HUMAN	43.14	1	1		28920	MHC class I antigen (Fragment) OS=Homo sapiens GN=HLA-A PE=2 SV=1
42	204105	tr|H6SSQ1|H6SSQ1_HUMAN	43.14	1	1		31564	MHC class I antigen (Fragment) OS=Homo sapiens GN=HLA-A PE=3 SV=1
42	204106	tr|D0RB02|D0RB02_HUMAN	43.14	1	1		31670	MHC class I antigen (Fragment) OS=Homo sapiens GN=HLA-A PE=3 SV=1
42	204107	tr|B7VCC4|B7VCC4_HUMAN	43.14	1	1		31544	MHC class I antigen (Fragment) OS=Homo sapiens GN=HLA-A PE=3 SV=1
42	204108	tr|H6SFV4|H6SFV4_HUMAN	43.14	1	1		31566	MHC class I antigen (Fragment) OS=Homo sapiens GN=HLA-A PE=3 SV=1
42	204109	tr|I6Z8E6|I6Z8E6_HUMAN	43.14	1	1		31634	MHC class I antigen (Fragment) OS=Homo sapiens GN=HLA-A PE=3 SV=1
42	204110	tr|A8E0Y5|A8E0Y5_HUMAN	43.14	1	1		31571	MHC class I antigen (Fragment) OS=Homo sapiens GN=HLA-B PE=3 SV=1
42	204111	tr|B2DFW8|B2DFW8_HUMAN	43.14	1	1		31502	MHC class I antigen (Fragment) OS=Homo sapiens GN=HLA-A PE=3 SV=1
42	204112	tr|D2KZ30|D2KZ30_HUMAN	43.14	1	1		31612	MHC class I antigen (Fragment) OS=Homo sapiens GN=HLA-A PE=3 SV=1
42	204113	tr|C7DRS0|C7DRS0_HUMAN	43.14	1	1		31599	MHC class I antigen (Fragment) OS=Homo sapiens GN=HLA-B PE=3 SV=1
42	204114	tr|B2DFX0|B2DFX0_HUMAN	43.14	1	1		31585	MHC class I antigen (Fragment) OS=Homo sapiens GN=HLA-B PE=3 SV=1
42	204115	tr|F4YTE2|F4YTE2_HUMAN	43.14	1	1		34323	MHC class I antigen (Fragment) OS=Homo sapiens GN=HLA-B PE=3 SV=1
42	204116	tr|Q5SRN7|Q5SRN7_HUMAN	43.14	1	1		34211	HLA class I histocompatibility antigen A-68 alpha chain OS=Homo sapiens GN=HLA-A PE=2 SV=2
42	204117	tr|A6H567|A6H567_HUMAN	43.14	1	1		36916	MHC class I antigen (Fragment) OS=Homo sapiens GN=HLA-B PE=3 SV=1
42	204118	tr|F6IQR9|F6IQR9_HUMAN	43.14	1	1		38074	MHC class I antigen (Fragment) OS=Homo sapiens GN=HLA-A PE=2 SV=1
42	204119	tr|F4NBQ1|F4NBQ1_HUMAN	43.14	1	1		38118	MHC class I antigen (Fragment) OS=Homo sapiens GN=HLA-B PE=2 SV=1
42	204120	tr|F6IQY5|F6IQY5_HUMAN	43.14	1	1		38165	MHC class I antigen (Fragment) OS=Homo sapiens GN=HLA-A PE=2 SV=1
42	204121	tr|D7RVC0|D7RVC0_HUMAN	43.14	1	1		38337	MHC class I antigen (Fragment) OS=Homo sapiens GN=HLA-Cw PE=3 SV=1
42	204122	tr|F6IQQ9|F6IQQ9_HUMAN	43.14	1	1		39213	MHC class I antigen (Fragment) OS=Homo sapiens GN=HLA-C PE=3 SV=1
42	204123	tr|F6IQC9|F6IQC9_HUMAN	43.14	1	1		39197	MHC class I antigen (Fragment) OS=Homo sapiens GN=HLA-C PE=3 SV=1
42	204124	tr|C5J406|C5J406_HUMAN	43.14	1	1		40447	MHC class I antigen OS=Homo sapiens GN=HLA-B PE=3 SV=1
42	204125	tr|Q0EFB2|Q0EFB2_HUMAN	43.14	1	1		40521	HLA-B protein OS=Homo sapiens GN=HLA-B PE=3 SV=1
42	204126	tr|C6K6J1|C6K6J1_HUMAN	43.14	1	1		40592	MHC class I antigen OS=Homo sapiens GN=HLA-B PE=3 SV=1
42	204127	tr|Q9GIX2|Q9GIX2_HUMAN	43.14	1	1		40433	MHC class I antigen OS=Homo sapiens GN=HLA-B PE=3 SV=1
42	204128	P16190|1A33_HUMAN	43.14	1	1		40892	HLA class I histocompatibility antigen A-33 alpha chain OS=Homo sapiens GN=HLA-A PE=2 SV=3
42	204129	tr|I3ZN80|I3ZN80_HUMAN	43.14	1	1		40918	MHC class I antigen OS=Homo sapiens GN=HLA-A PE=3 SV=1
42	204130	tr|B5TZV4|B5TZV4_HUMAN	43.14	1	1		41039	MHC class I antigen OS=Homo sapiens GN=HLA-A PE=3 SV=1
42	204131	tr|C5IWY0|C5IWY0_HUMAN	43.14	1	1		40826	MHC class I antigen OS=Homo sapiens GN=HLA-A PE=3 SV=1
42	204132	tr|Q52QV2|Q52QV2_HUMAN	43.14	1	1		41009	MHC class I antigen OS=Homo sapiens GN=HLA-C PE=3 SV=1
42	204133	tr|C1K0Y5|C1K0Y5_HUMAN	43.14	1	1		40863	MHC class I antigen OS=Homo sapiens GN=HLA-Cw PE=3 SV=1
44	204134	tr|P79547|P79547_HUMAN	36.31	1	1		10907	MHC class II antigen (Fragment) OS=Homo sapiens GN=HLA-DR PE=4 SV=1
44	204135	tr|D6MJC0|D6MJC0_HUMAN	36.31	1	1		10834	MHC class II antigen (Fragment) OS=Homo sapiens GN=HLA-DR15 PE=2 SV=1
44	204136	tr|Q9TQ42|Q9TQ42_HUMAN	36.31	1	1		10904	MHC class II antigen (Fragment) OS=Homo sapiens GN=HLA-DRB1 PE=4 SV=1
44	204137	tr|Q19K84|Q19K84_HUMAN	36.31	1	1		11002	MHC class II antigen (Fragment) OS=Homo sapiens GN=HLA-DRB1 PE=2 SV=1
44	204138	tr|Q1EIR2|Q1EIR2_HUMAN	36.31	1	1		10897	MHC class II antigen (Fragment) OS=Homo sapiens GN=HLA-DRB1 PE=2 SV=1
44	204139	tr|F8LFR6|F8LFR6_HUMAN	36.31	1	1		21398	MHC class II antigen (Fragment) OS=Homo sapiens GN=HLA-DQB1 PE=2 SV=1
44	204140	tr|I4EPD5|I4EPD5_HUMAN	36.31	1	1		21398	MHC class II antigen (Fragment) OS=Homo sapiens GN=HLA-DQB1 PE=4 SV=1
44	204141	tr|F1CT76|F1CT76_HUMAN	36.31	1	1		25483	MHC class II antigen (Fragment) OS=Homo sapiens GN=HLA-DRB1 PE=2 SV=1
44	204142	tr|B0S7Y8|B0S7Y8_HUMAN	36.31	1	1		25842	HLA class II histocompatibility antigen DQ beta 1 chain OS=Homo sapiens GN=HLA-DQB1 PE=4 SV=1
44	204143	tr|Q30030|Q30030_HUMAN	36.31	1	1		26312	HLA-DPB1 protein (Fragment) OS=Homo sapiens GN=HLA-DPB1 PE=2 SV=1
44	204144	tr|Q30132|Q30132_HUMAN	36.31	1	1		26407	HLA-DRB1 protein (Fragment) OS=Homo sapiens GN=HLA-DRB1 PE=2 SV=1
44	204145	tr|Q30147|Q30147_HUMAN	36.31	1	1		27092	MHC class II HLA-DR-beta mRNA (DR6) (Fragment) OS=Homo sapiens PE=2 SV=1
44	204146	tr|Q30151|Q30151_HUMAN	36.31	1	1		27274	HLA-DRB5 protein (Fragment) OS=Homo sapiens GN=HLA-DRB5 PE=2 SV=1
44	204147	tr|F8VUZ1|F8VUZ1_HUMAN	36.31	1	1		27192	HLA class II histocompatibility antigen DQ beta 1 chain OS=Homo sapiens GN=HLA-DQB1 PE=2 SV=1
44	204148	tr|Q29901|Q29901_HUMAN	36.31	1	1		29862	Lymphocyte antigen OS=Homo sapiens GN=HLA-DRw12 PE=2 SV=1
44	204149	tr|Q95462|Q95462_HUMAN	36.31	1	1		30265	DRB1 protein (Fragment) OS=Homo sapiens GN=DRB1 PE=2 SV=1
82	204839	tr|G5E9C8|G5E9C8_HUMAN	30.22	2	1		150857	Son of sevenless homolog 1 OS=Homo sapiens GN=SOS1 PE=2 SV=1
69	214245	tr|H9KV75|H9KV75_HUMAN	39.95	1	1		94826	Alpha-actinin-1 OS=Homo sapiens GN=ACTN1 PE=4 SV=1
69	214247	tr|H7C144|H7C144_HUMAN	39.95	1	1		39002	Alpha-actinin-4 (Fragment) OS=Homo sapiens GN=ACTN4 PE=4 SV=1
69	214248	tr|F5GXS2|F5GXS2_HUMAN	39.95	1	1		59588	Alpha-actinin-4 OS=Homo sapiens GN=ACTN4 PE=2 SV=1
69	214249	tr|A4K467|A4K467_HUMAN	39.95	1	1		59579	Actinin alpha4 isoform OS=Homo sapiens GN=ACTN4 PE=2 SV=1
69	214267	tr|Q5ZEZ4|Q5ZEZ4_HUMAN	39.95	1	1		10195	Alpha-actinin 1 (Fragment) OS=Homo sapiens GN=ACTN1 PE=2 SV=1
69	214268	tr|H0YJ11|H0YJ11_HUMAN	39.95	1	1		24382	Alpha-actinin-1 (Fragment) OS=Homo sapiens GN=ACTN1 PE=4 SV=1
69	214269	tr|H0YJW3|H0YJW3_HUMAN	39.95	1	1		28881	Alpha-actinin-1 (Fragment) OS=Homo sapiens GN=ACTN1 PE=4 SV=1
69	214270	tr|H7C5W8|H7C5W8_HUMAN	39.95	1	1		34320	Alpha-actinin-1 (Fragment) OS=Homo sapiens GN=ACTN1 PE=4 SV=1
69	214271	tr|A1L0V1|A1L0V1_HUMAN	39.95	1	1		35412	ACTN1 protein (Fragment) OS=Homo sapiens GN=ACTN1 PE=2 SV=1
69	214272	tr|B3KUX9|B3KUX9_HUMAN	39.95	1	1		54281	cDNA FLJ40884 fis clone UTERU2000607 highly similar to Alpha-actinin-1 OS=Homo sapiens PE=2 SV=1
69	214273	tr|B4DFY0|B4DFY0_HUMAN	39.95	1	1		61575	cDNA FLJ53313 highly similar to Alpha-actinin-1 OS=Homo sapiens PE=2 SV=1
140	215100	tr|E9PFN4|E9PFN4_HUMAN	22.37	1	1		135303	Sodium bicarbonate cotransporter 3 OS=Homo sapiens GN=SLC4A7 PE=2 SV=1
50	223419	P12532|KCRU_HUMAN	92.14	3	3		47037	Creatine kinase U-type mitochondrial OS=Homo sapiens GN=CKMT1A PE=1 SV=1
52	223420	tr|Q9MY06|Q9MY06_HUMAN	65.73	2	1		8999	MHC class II antigen (Fragment) OS=Homo sapiens PE=2 SV=1
52	223421	tr|Q9TQ70|Q9TQ70_HUMAN	65.73	2	1		10176	MHC class II antigen (Fragment) OS=Homo sapiens GN=HLA-DRB1 PE=4 SV=1
52	223422	tr|O19547|O19547_HUMAN	65.73	2	1		10267	MHC class II antigen HLA-DR-beta 1 (Fragment) OS=Homo sapiens GN=HLA-DRB1 PE=4 SV=1
52	223423	tr|L0BXL7|L0BXL7_HUMAN	65.73	2	1		10808	MHC class II antigen (Fragment) OS=Homo sapiens GN=HLA-DRB1 PE=4 SV=1
52	223424	tr|D5G2K9|D5G2K9_HUMAN	65.73	2	1		10785	MHC class II antigen (Fragment) OS=Homo sapiens GN=HLA-DRB1 PE=4 SV=1
52	223425	tr|H2BDS2|H2BDS2_HUMAN	65.73	2	1		10785	MHC class II antigen (Fragment) OS=Homo sapiens GN=HLA-DRB1 PE=4 SV=1
52	223426	tr|G8GB41|G8GB41_HUMAN	65.73	2	1		10838	MHC class II antigen (Fragment) OS=Homo sapiens GN=HLA-DRB1 PE=4 SV=1
54	223427	tr|I3QHS0|I3QHS0_HUMAN	79.27	2	2		20816	MHC class I antigen (Fragment) OS=Homo sapiens GN=HLA-B PE=3 SV=1
54	223428	tr|H6A2D9|H6A2D9_HUMAN	79.27	2	2		21095	MHC class I antigen (Fragment) OS=Homo sapiens GN=HLA-B PE=3 SV=1
54	223429	tr|J9PWW3|J9PWW3_HUMAN	79.27	2	2		21123	MHC class I antigen (Fragment) OS=Homo sapiens GN=HLA-C PE=3 SV=1
54	223430	tr|D6MKV7|D6MKV7_HUMAN	79.27	2	2		21279	MHC class I antigen (Fragment) OS=Homo sapiens GN=HLA-C PE=3 SV=1
54	223431	tr|Q0P6N1|Q0P6N1_HUMAN	79.27	2	2		21235	MHC class I antigen (Fragment) OS=Homo sapiens GN=HLA-CW PE=3 SV=1
54	223432	tr|C9WCY7|C9WCY7_HUMAN	79.27	2	2		21075	MHC class I antigen (Fragment) OS=Homo sapiens GN=HLA-B PE=3 SV=1
54	223433	tr|K9LCP2|K9LCP2_HUMAN	79.27	2	2		21098	MHC class I antigen (Fragment) OS=Homo sapiens GN=HLA-B PE=4 SV=1
54	223434	tr|G1EPK0|G1EPK0_HUMAN	79.27	2	2		20767	MHC class I antigen (Fragment) OS=Homo sapiens GN=HLA-B PE=3 SV=1
54	223435	tr|J7K034|J7K034_HUMAN	79.27	2	2		21047	MHC class I antigen (Fragment) OS=Homo sapiens GN=HLA-C PE=3 SV=1
54	223436	tr|G1ENW4|G1ENW4_HUMAN	79.27	2	2		21125	MHC class I antigen (Fragment) OS=Homo sapiens GN=HLA-C PE=3 SV=1
54	223437	tr|Q0E9R0|Q0E9R0_HUMAN	79.27	2	2		21132	MHC class I antigen (Fragment) OS=Homo sapiens GN=HLA-C PE=3 SV=1
54	223438	tr|I6RCY1|I6RCY1_HUMAN	79.27	2	2		20841	MHC class I antigen (Fragment) OS=Homo sapiens GN=HLA-B PE=3 SV=1
54	223439	tr|Q9TP32|Q9TP32_HUMAN	79.27	2	2		21092	MHC class I antigen (Fragment) OS=Homo sapiens GN=HLA-B PE=2 SV=1
54	223440	tr|G0WVC1|G0WVC1_HUMAN	79.27	2	2		20933	MHC class I antigen (Fragment) OS=Homo sapiens GN=HLA-B PE=3 SV=1
54	223441	tr|H6A2G0|H6A2G0_HUMAN	79.27	2	2		21116	MHC class I antigen (Fragment) OS=Homo sapiens GN=HLA-C PE=3 SV=1
54	223442	tr|E3SG97|E3SG97_HUMAN	79.27	2	2		20815	MHC class I antigen (Fragment) OS=Homo sapiens GN=HLA-B PE=3 SV=1
54	223443	tr|C5IZX5|C5IZX5_HUMAN	79.27	2	2		21063	MHC class I antigen (Fragment) OS=Homo sapiens GN=HLA-C PE=3 SV=1
54	223444	tr|D2DKM8|D2DKM8_HUMAN	79.27	2	2		20972	MHC class I antigen (Fragment) OS=Homo sapiens GN=HLA-B PE=3 SV=1
54	223445	tr|C0M107|C0M107_HUMAN	79.27	2	2		21079	MHC class I antigen (Fragment) OS=Homo sapiens GN=HLA-B PE=3 SV=1
54	223446	tr|F4YU66|F4YU66_HUMAN	79.27	2	2		21079	MHC class I antigen (Fragment) OS=Homo sapiens GN=HLA-B PE=3 SV=1
54	223447	tr|C5IZZ0|C5IZZ0_HUMAN	79.27	2	2		21078	MHC class I antigen (Fragment) OS=Homo sapiens GN=HLA-C PE=3 SV=1
54	223448	tr|I6NWJ2|I6NWJ2_HUMAN	79.27	2	2		21059	MHC class I antigen (Fragment) OS=Homo sapiens GN=HLA-C PE=3 SV=1
54	223449	tr|G1EPY6|G1EPY6_HUMAN	79.27	2	2		21142	MHC class I antigen (Fragment) OS=Homo sapiens GN=HLA-B PE=3 SV=1
54	223450	tr|D7NQZ4|D7NQZ4_HUMAN	79.27	2	2		21278	MHC class I antigen (Fragment) OS=Homo sapiens GN=HLA-C PE=3 SV=1
54	223451	tr|C5IZS4|C5IZS4_HUMAN	79.27	2	2		21024	MHC class I antigen (Fragment) OS=Homo sapiens GN=HLA-B PE=3 SV=1
54	223452	tr|G1EQD7|G1EQD7_HUMAN	79.27	2	2		21203	MHC class I antigen (Fragment) OS=Homo sapiens GN=HLA-C PE=3 SV=1
54	223453	tr|Q95IA8|Q95IA8_HUMAN	79.27	2	2		21000	MHC class I antigen (Fragment) OS=Homo sapiens GN=HLA-B PE=2 SV=1
54	223454	tr|O78051|O78051_HUMAN	79.27	2	2		23313	MHC class I antigen HLA-B heavy chain (Fragment) OS=Homo sapiens GN=HLA-B PE=3 SV=1
54	223455	tr|O78050|O78050_HUMAN	79.27	2	2		23362	MHC class I antigen HLA-B heavy chain (Fragment) OS=Homo sapiens GN=HLA-B PE=3 SV=1
54	223456	tr|G0WJF3|G0WJF3_HUMAN	79.27	2	2		31662	MHC class I antigen (Fragment) OS=Homo sapiens GN=HLA-C PE=3 SV=1
54	223457	tr|I7H0B8|I7H0B8_HUMAN	79.27	2	2		31615	MHC class I antigen (Fragment) OS=Homo sapiens GN=HLA-B PE=3 SV=1
54	223458	tr|I7A3E6|I7A3E6_HUMAN	79.27	2	2		31799	MHC class I antigen (Fragment) OS=Homo sapiens GN=HLA-B PE=3 SV=1
54	223459	tr|B6EBD8|B6EBD8_HUMAN	79.27	2	2		31627	MHC class I antigen (Fragment) OS=Homo sapiens GN=HLA-B PE=3 SV=1
54	223460	tr|B2DG11|B2DG11_HUMAN	79.27	2	2		31527	MHC class I antigen (Fragment) OS=Homo sapiens GN=HLA-B PE=3 SV=1
54	223461	tr|F2XI41|F2XI41_HUMAN	79.27	2	2		31726	MHC class I antigen (Fragment) OS=Homo sapiens GN=HLA-B PE=3 SV=1
54	223462	tr|C0M115|C0M115_HUMAN	79.27	2	2		34470	MHC class I antigen (Fragment) OS=Homo sapiens GN=HLA-Cw PE=3 SV=1
54	223463	tr|F4NC09|F4NC09_HUMAN	79.27	2	2		38324	MHC class I antigen (Fragment) OS=Homo sapiens GN=HLA-B PE=3 SV=1
54	223464	tr|D2KPG8|D2KPG8_HUMAN	79.27	2	2		37747	MHC class I antigen (Fragment) OS=Homo sapiens GN=HLA-B PE=3 SV=1
54	223465	tr|F6IQP6|F6IQP6_HUMAN	79.27	2	2		39324	MHC class I antigen (Fragment) OS=Homo sapiens GN=HLA-C PE=3 SV=1
54	223466	tr|F6IQQ5|F6IQQ5_HUMAN	79.27	2	2		39216	MHC class I antigen (Fragment) OS=Homo sapiens GN=HLA-C PE=3 SV=1
54	223467	tr|Q0VJ75|Q0VJ75_HUMAN	79.27	2	2		40299	MHC class I antigen OS=Homo sapiens GN=HLA-B PE=3 SV=1
54	223468	tr|Q08GE4|Q08GE4_HUMAN	79.27	2	2		40524	MHC class I antigen OS=Homo sapiens GN=HLA-B PE=3 SV=1
54	223469	tr|B1GYE6|B1GYE6_HUMAN	79.27	2	2		40845	MHC class I antigen (Fragment) OS=Homo sapiens GN=HLA-C PE=3 SV=1
54	223470	tr|I3ZN87|I3ZN87_HUMAN	79.27	2	2		40780	MHC class I antigen OS=Homo sapiens GN=HLA-C PE=3 SV=1
81	223516	P19105|ML12A_HUMAN	51.27	1	1		19794	Myosin regulatory light chain 12A OS=Homo sapiens GN=MYL12A PE=1 SV=2
81	223517	tr|Q53X45|Q53X45_HUMAN	51.27	1	1		19794	Myosin regulatory light chain OS=Homo sapiens GN=MRLC3 PE=2 SV=1
81	223518	tr|Q53HL1|Q53HL1_HUMAN	51.27	1	1		19793	Myosin regulatory light chain MRCL3 variant (Fragment) OS=Homo sapiens PE=2 SV=1
81	223519	O14950|ML12B_HUMAN	51.27	1	1		19779	Myosin regulatory light chain 12B OS=Homo sapiens GN=MYL12B PE=1 SV=2
81	223520	tr|J3QRS3|J3QRS3_HUMAN	51.27	1	1		20457	Myosin regulatory light chain 12A OS=Homo sapiens GN=MYL12A PE=4 SV=1
67	223521	tr|D6RCN3|D6RCN3_HUMAN	48.96	1	1		3713	Annexin A5 OS=Homo sapiens GN=ANXA5 PE=2 SV=1
68	223542	tr|E9PL32|E9PL32_HUMAN	42.57	1	1		10575	Cathepsin B heavy chain (Fragment) OS=Homo sapiens GN=CTSB PE=2 SV=1
68	223543	tr|E9PS78|E9PS78_HUMAN	42.57	1	1		10703	Cathepsin B heavy chain (Fragment) OS=Homo sapiens GN=CTSB PE=2 SV=1
68	223544	tr|E9PR54|E9PR54_HUMAN	42.57	1	1		11375	Cathepsin B heavy chain (Fragment) OS=Homo sapiens GN=CTSB PE=2 SV=1
68	223545	tr|E9PJ67|E9PJ67_HUMAN	42.57	1	1		11760	Cathepsin B heavy chain (Fragment) OS=Homo sapiens GN=CTSB PE=2 SV=1
68	223546	tr|Q5HYG5|Q5HYG5_HUMAN	42.57	1	1		12668	Putative uncharacterized protein DKFZp686N0152 OS=Homo sapiens GN=DKFZp686N0152 PE=2 SV=1
68	223547	tr|E9PCB3|E9PCB3_HUMAN	42.57	1	1		12682	Cathepsin B heavy chain OS=Homo sapiens GN=CTSB PE=4 SV=2
68	223548	tr|E9PKD0|E9PKD0_HUMAN	42.57	1	1		13210	Cathepsin B heavy chain (Fragment) OS=Homo sapiens GN=CTSB PE=2 SV=1
68	223549	tr|E9PKQ7|E9PKQ7_HUMAN	42.57	1	1		15377	Cathepsin B heavy chain (Fragment) OS=Homo sapiens GN=CTSB PE=2 SV=1
68	223550	tr|E9PNL5|E9PNL5_HUMAN	42.57	1	1		16082	Cathepsin B heavy chain (Fragment) OS=Homo sapiens GN=CTSB PE=4 SV=1
68	223551	tr|E9PHZ5|E9PHZ5_HUMAN	42.57	1	1		16633	Cathepsin B heavy chain (Fragment) OS=Homo sapiens GN=CTSB PE=2 SV=1
68	223552	tr|E9PLY3|E9PLY3_HUMAN	42.57	1	1		18515	Cathepsin B heavy chain (Fragment) OS=Homo sapiens GN=CTSB PE=2 SV=1
68	223553	tr|E9PSG5|E9PSG5_HUMAN	42.57	1	1		18929	Cathepsin B heavy chain (Fragment) OS=Homo sapiens GN=CTSB PE=2 SV=1
68	223554	tr|E9PQM1|E9PQM1_HUMAN	42.57	1	1		19478	Cathepsin B heavy chain (Fragment) OS=Homo sapiens GN=CTSB PE=2 SV=1
68	223555	P07858|CATB_HUMAN	42.57	1	1		37822	Cathepsin B OS=Homo sapiens GN=CTSB PE=1 SV=3
68	223556	tr|A8K2H4|A8K2H4_HUMAN	42.57	1	1		37794	cDNA FLJ78235 OS=Homo sapiens PE=2 SV=1
83	223557	tr|B4DN41|B4DN41_HUMAN	38.58	1	1		67763	cDNA FLJ53366 highly similar to Probable ATP-dependent RNA helicase DDX5 (EC 3.6.1.-) OS=Homo sapiens PE=2 SV=1
74	223602	tr|Q6ZNC2|Q6ZNC2_HUMAN	24.7	1	1		30533	cDNA FLJ16223 fis clone CTONG3003598 OS=Homo sapiens PE=2 SV=1
78	223610	tr|H9E7T7|H9E7T7_HUMAN	20.39	1	1		25434	Cytochrome c oxidase subunit 2 (Fragment) OS=Homo sapiens GN=COX2 PE=3 SV=1
78	223611	tr|Q6VJJ3|Q6VJJ3_HUMAN	20.39	1	1		25595	Cytochrome c oxidase subunit 2 OS=Homo sapiens GN=COX2 PE=3 SV=1
59	230902	tr|D6RGK2|D6RGK2_HUMAN	22.06	1	1		18278	PACRG-like protein OS=Homo sapiens GN=PACRGL PE=2 SV=1
44	244002	tr|Q5JXT2|Q5JXT2_HUMAN	27.06	1	1		31253	Nucleolar protein 56 (Fragment) OS=Homo sapiens GN=NOP56 PE=4 SV=1
13	252597	tr|E7EXB4|E7EXB4_HUMAN	105.94	5	5		23783	60 kDa heat shock protein mitochondrial (Fragment) OS=Homo sapiens GN=HSPD1 PE=2 SV=1
73	275541	tr|H0Y8C9|H0Y8C9_HUMAN	37.22	3	1		118130	ATP-binding cassette sub-family A member 2 (Fragment) OS=Homo sapiens GN=ABCA2 PE=3 SV=1
59	344973	tr|D6RC23|D6RC23_HUMAN	22.06	1	1		15450	PACRG-like protein (Fragment) OS=Homo sapiens GN=PACRGL PE=2 SV=1
59	345034	tr|D6RC13|D6RC13_HUMAN	22.06	1	1		22201	PACRG-like protein (Fragment) OS=Homo sapiens GN=PACRGL PE=2 SV=1
59	345080	tr|D6R9N9|D6R9N9_HUMAN	22.06	1	1		27276	PACRG-like protein (Fragment) OS=Homo sapiens GN=PACRGL PE=2 SV=1
112	397852	tr|A0A0B4J1R6|A0A0B4J1R6_HUMAN	29.34	2	1		49910	Transketolase OS=Homo sapiens OX=9606 GN=TKT PE=1 SV=1
85	397974	sp|Q2MJR0|SPRE3_HUMAN	25.96	1	1	Carbamidomethylation	42670	Sprouty-related EVH1 domain-containing protein 3 OS=Homo sapiens OX=9606 GN=SPRED3 PE=2 SV=1
119	399086	sp|Q12950|FOXD4_HUMAN	26.44	2	2		47309	Forkhead box protein D4 OS=Homo sapiens OX=9606 GN=FOXD4 PE=2 SV=4
63	399803	sp|Q9BZC7|ABCA2_HUMAN	28.85	2	2		269830	ATP-binding cassette sub-family A member 2 OS=Homo sapiens OX=9606 GN=ABCA2 PE=1 SV=4
73	399804	tr|J3QSS3|J3QSS3_HUMAN	37.22	3	1		269929	ATP-binding cassette sub-family A member 2 OS=Homo sapiens OX=9606 GN=ABCA2 PE=1 SV=2
73	399805	tr|A0A087WXK5|A0A087WXK5_HUMAN	37.22	3	1		273005	ATP-binding cassette sub-family A member 2 OS=Homo sapiens OX=9606 GN=ABCA2 PE=1 SV=1
129	400369	sp|Q5T3U5|MRP7_HUMAN	20.78	1	1		161628	Multidrug resistance-associated protein 7 OS=Homo sapiens OX=9606 GN=ABCC10 PE=1 SV=1
59	400412	sp|P07237|PDIA1_HUMAN	32.05	1	1		57116	Protein disulfide-isomerase OS=Homo sapiens OX=9606 GN=P4HB PE=1 SV=3
47	400535	sp|Q92766|RREB1_HUMAN	30.52	2	1		181419	Ras-responsive element-binding protein 1 OS=Homo sapiens OX=9606 GN=RREB1 PE=1 SV=3
65	400581	sp|A6NKT7|RGPD3_HUMAN	23.96	1	1		197486	RanBP2-like and GRIP domain-containing protein 3 OS=Homo sapiens OX=9606 GN=RGPD3 PE=3 SV=2
193	400640	tr|A0A087WY00|A0A087WY00_HUMAN	27.02	2	1		212200	Unconventional myosin-Va OS=Homo sapiens OX=9606 GN=MYO5A PE=1 SV=1
26	400670	tr|E9PG32|E9PG32_HUMAN	31.52	1	1	Oxidation (M)	454330	Dynein heavy chain 12 axonemal OS=Homo sapiens OX=9606 GN=DNAH12 PE=1 SV=2
127	400808	sp|Q2TAZ0|ATG2A_HUMAN	26.17	2	1		212858	Autophagy-related protein 2 homolog A OS=Homo sapiens OX=9606 GN=ATG2A PE=1 SV=3
57	400820	sp|Q8TF72|SHRM3_HUMAN	20.93	1	1		216856	Protein Shroom3 OS=Homo sapiens OX=9606 GN=SHROOM3 PE=1 SV=2
80	415818	tr|E9PPJ1|E9PPJ1_HUMAN	20.74	1	1		195646	Kinetochore scaffold 1 OS=Homo sapiens OX=9606 GN=KNL1 PE=1 SV=2
80	415819	sp|Q8NG31|KNL1_HUMAN	20.74	1	1		265389	Kinetochore scaffold 1 OS=Homo sapiens OX=9606 GN=KNL1 PE=1 SV=3
47	415992	sp|Q96HP0|DOCK6_HUMAN	24.22	1	1		229556	Dedicator of cytokinesis protein 6 OS=Homo sapiens OX=9606 GN=DOCK6 PE=1 SV=3
60	416002	sp|Q8WXI9|P66B_HUMAN	21.9	1	1	Carbamidomethylation	65261	Transcriptional repressor p66-beta OS=Homo sapiens OX=9606 GN=GATAD2B PE=1 SV=1
28	416020	sp|Q9UPN3|MACF1_HUMAN	38.15	3	1		838323	Microtubule-actin cross-linking factor 1 isoforms 1/2/3/5 OS=Homo sapiens OX=9606 GN=MACF1 PE=1 SV=4
102	416135	sp|P07305|H10_HUMAN	31.56	1	1		20863	Histone H1.0 OS=Homo sapiens OX=9606 GN=H1-0 PE=1 SV=3
26	423176	sp|Q6ZR08|DYH12_HUMAN	31.52	1	1	Oxidation (M)	356942	Dynein heavy chain 12 axonemal OS=Homo sapiens OX=9606 GN=DNAH12 PE=2 SV=2
72	423227	sp|A6H8Y1|BDP1_HUMAN	20.5	1	1		293883	Transcription factor TFIIIB component B'' homolog OS=Homo sapiens OX=9606 GN=BDP1 PE=1 SV=3
66	423589	tr|A0A087X0X3|A0A087X0X3_HUMAN	36.59	2	2		77570	Heterogeneous nuclear ribonucleoprotein M OS=Homo sapiens OX=9606 GN=HNRNPM PE=1 SV=1
53	423607	sp|P46821|MAP1B_HUMAN	20.5	1	1		270632	Microtubule-associated protein 1B OS=Homo sapiens OX=9606 GN=MAP1B PE=1 SV=2
56	426689	sp|Q9P2P6|STAR9_HUMAN	23.77	1	1		516351	StAR-related lipid transfer protein 9 OS=Homo sapiens OX=9606 GN=STARD9 PE=1 SV=3
61	426733	sp|P24043|LAMA2_HUMAN	28.06	2	1		343906	Laminin subunit alpha-2 OS=Homo sapiens OX=9606 GN=LAMA2 PE=1 SV=4
17	427270	tr|A0A1W2PP35|A0A1W2PP35_HUMAN	61.61	1	1		80649	Heterogeneous nuclear ribonucleoprotein U (Fragment) OS=Homo sapiens OX=9606 GN=HNRNPU PE=1 SV=1
17	427271	tr|A0A1W2PPS1|A0A1W2PPS1_HUMAN	49.68	3	2	Mutation	88318	Heterogeneous nuclear ribonucleoprotein U OS=Homo sapiens OX=9606 GN=HNRNPU PE=1 SV=1
48	427305	sp|O75528|TADA3_HUMAN	23.69	1	1		48902	Transcriptional adapter 3 OS=Homo sapiens OX=9606 GN=TADA3 PE=1 SV=1
29	427497	sp|P07910|HNRPC_HUMAN	41.62	2	2		33670	Heterogeneous nuclear ribonucleoproteins C1/C2 OS=Homo sapiens OX=9606 GN=HNRNPC PE=1 SV=4
60	501236	B4DSM7|B4DSM7_HUMAN	20.81	1	1		55454	cDNA FLJ50647 highly similar to Zinc finger and BTB domain-containing protein 17 OS=Homo sapiens OX=9606 PE=2 SV=1
85	501237	Q8NFG3|Q8NFG3_HUMAN	31.14	2	2		6122	BX1 (Fragment) OS=Homo sapiens OX=9606 PE=2 SV=1
85	501238	H7C1J8|H7C1J8_HUMAN	31.14	2	2		11298	Heterogeneous nuclear ribonucleoprotein A3 (Fragment) OS=Homo sapiens OX=9606 GN=HNRNPA3 PE=1 SV=1
85	501239	B4E036|B4E036_HUMAN	31.14	2	2		14040	cDNA FLJ59080 highly similar to Heterogeneous nuclear ribonucleoprotein A3 OS=Homo sapiens OX=9606 PE=2 SV=1
85	501240	Q66K53|Q66K53_HUMAN	31.14	2	2		17868	HNRPA3 protein (Fragment) OS=Homo sapiens OX=9606 GN=HNRPA3 PE=2 SV=1
85	501241	B4E3E6|B4E3E6_HUMAN	31.14	2	2		34189	cDNA FLJ58832 highly similar to Heterogeneous nuclear ribonucleoprotein A3 OS=Homo sapiens OX=9606 PE=2 SV=1
86	501266	A8K679|A8K679_HUMAN	21.72	1	1		27104	cDNA FLJ78581 OS=Homo sapiens OX=9606 PE=2 SV=1
327	501274	A0A6Q8PHK0|A0A6Q8PHK0_HUMAN	24.08	2	2		228482	E3 ubiquitin-protein ligase TRIP12 OS=Homo sapiens OX=9606 GN=TRIP12 PE=1 SV=1
59	501312	M0R0K9|M0R0K9_HUMAN	26.14	1	1		48435	Transcription intermediary factor 1-beta (Fragment) OS=Homo sapiens OX=9606 GN=TRIM28 PE=1 SV=1
72	501321	B1WB49|B1WB49_HUMAN	20.5	1	1		293427	BDP1 protein (Fragment) OS=Homo sapiens OX=9606 GN=BDP1 PE=2 SV=1
60	501325	B4DYU5|B4DYU5_HUMAN	20.81	1	1		57091	cDNA FLJ50396 highly similar to Zinc finger and BTB domain-containing protein 17 OS=Homo sapiens OX=9606 PE=2 SV=1
89	501355	A8K9U1|A8K9U1_HUMAN	23.91	1	1		191158	cDNA FLJ76468 highly similar to Homo sapiens cullin 7 (CUL7) mRNA OS=Homo sapiens OX=9606 PE=2 SV=1
67	501357	M0QY96|M0QY96_HUMAN	26.15	1	1		12462	Heterogeneous nuclear ribonucleoprotein M (Fragment) OS=Homo sapiens OX=9606 GN=HNRNPM PE=1 SV=1
110	501379	B7Z514|B7Z514_HUMAN	24.08	1	1		38179	Glutathione synthetase OS=Homo sapiens OX=9606 PE=2 SV=1
110	501380	B7Z1C5|B7Z1C5_HUMAN	24.08	1	1		44838	Glutathione synthetase OS=Homo sapiens OX=9606 PE=2 SV=1
110	501381	A0A2R8Y430|A0A2R8Y430_HUMAN	24.08	1	1		49977	Glutathione synthetase OS=Homo sapiens OX=9606 GN=GSS PE=1 SV=1
110	501382	V9HWJ1|V9HWJ1_HUMAN	24.08	1	1		52385	Glutathione synthetase OS=Homo sapiens OX=9606 GN=HEL-S-64p PE=2 SV=1
114	501397	Q8TA90|Q8TA90_HUMAN	23.37	1	1		57500	Similar to Elongation factor 2b (Fragment) OS=Homo sapiens OX=9606 PE=2 SV=1
116	501401	Q6NZ55|Q6NZ55_HUMAN	22.67	1	1		24265	60S ribosomal protein L13 OS=Homo sapiens OX=9606 GN=RPL13 PE=1 SV=1
116	501402	A8K4C8|A8K4C8_HUMAN	22.67	1	1		24261	60S ribosomal protein L13 OS=Homo sapiens OX=9606 GN=RPL13 PE=2 SV=1
47	501414	Q8N959|Q8N959_HUMAN	25.15	1	1	Carbamidomethylation	35226	N-myc downstream-regulated gene 1 protein OS=Homo sapiens OX=9606 PE=2 SV=1
117	501415	D3DWL9|D3DWL9_HUMAN	22.45	1	1		151986	Cleavage and polyadenylation specific factor 1 160kDa isoform CRA_a OS=Homo sapiens OX=9606 GN=CPSF1 PE=4 SV=1
91	501418	Q96IE3|Q96IE3_HUMAN	21.49	1	1		113767	Similar to plectin 1 intermediate filament binding protein 500kD (Fragment) OS=Homo sapiens OX=9606 PE=2 SV=1
118	501419	A0A087WUX4|A0A087WUX4_HUMAN	22	1	1		27077	Voltage-dependent L-type calcium channel subunit alpha-1C (Fragment) OS=Homo sapiens OX=9606 GN=CACNA1C PE=1 SV=1
125	501441	sp|P29475|NOS1_HUMAN	20.53	1	1		160970	Nitric oxide synthase brain OS=Homo sapiens OX=9606 GN=NOS1 PE=1 SV=2
127	501473	A0A3B3ITZ9|A0A3B3ITZ9_HUMAN	20.42	1	1		103523	Thyroid hormone receptor-associated protein 3 OS=Homo sapiens OX=9606 GN=THRAP3 PE=1 SV=1
128	501489	Q6MZT4|Q6MZT4_HUMAN	20.73	1	1		155499	Uncharacterized protein DKFZp686E2242 (Fragment) OS=Homo sapiens OX=9606 GN=DKFZp686E2242 PE=2 SV=1
74	501490	Q0P6H7|Q0P6H7_HUMAN	28.78	1	1		50829	TRIM29 protein OS=Homo sapiens OX=9606 GN=TRIM29 PE=1 SV=2
130	501516	sp|D6REC4|CFA99_HUMAN	21.49	1	1		52293	Cilia- and flagella-associated protein 99 OS=Homo sapiens OX=9606 GN=CFAP99 PE=3 SV=1
76	501627	sp|P31947|1433S_HUMAN	34.69	2	1		27774	14-3-3 protein sigma OS=Homo sapiens OX=9606 GN=SFN PE=1 SV=1
131	501728	A0A2X0U4M4|A0A2X0U4M4_HUMAN	20.97	1	1		97574	ARHGEF26 (Fragment) OS=Homo sapiens OX=9606 GN=ARHGEF26 PE=4 SV=1
40	501830	A0A0U4BW16|A0A0U4BW16_HUMAN	34.35	2	2		226515	Non-muscle myosin heavy chain 9 OS=Homo sapiens OX=9606 GN=MYH9 PE=2 SV=1
87	501847	A0A1U9X7M8|A0A1U9X7M8_HUMAN	24.61	1	1		151345	DPCR1 OS=Homo sapiens OX=9606 PE=4 SV=1
87	501848	A0A1U9X7M2|A0A1U9X7M2_HUMAN	24.61	1	1		151083	DPCR1 OS=Homo sapiens OX=9606 PE=4 SV=1
87	501849	A0A1U9X7M9|A0A1U9X7M9_HUMAN	24.61	1	1		151156	DPCR1 OS=Homo sapiens OX=9606 PE=4 SV=1
63	501960	A0A2R8Y7H3|A0A2R8Y7H3_HUMAN	21.21	1	1		46789	Putative acyl-coenzyme A thioesterase 6 OS=Homo sapiens OX=9606 GN=ACOT6 PE=1 SV=1
63	501963	A0A7P0T933|A0A7P0T933_HUMAN	21.21	1	1		34246	ADP-ribosylation factor-like protein 13B OS=Homo sapiens OX=9606 GN=ARL13B PE=4 SV=1
93	502235	A0A0S2Z5W5|A0A0S2Z5W5_HUMAN	22.8	1	1		27503	G elongation factor mitochondrial 1 isoform 3 OS=Homo sapiens OX=9606 GN=GFM1 PE=2 SV=1
93	502236	D3DNL3|D3DNL3_HUMAN	22.8	1	1		46026	G elongation factor mitochondrial 1 isoform CRA_c OS=Homo sapiens OX=9606 GN=GFM1 PE=4 SV=1
93	502237	E5KND5|E5KND5_HUMAN	22.8	1	1		83472	Elongation factor G mitochondrial OS=Homo sapiens OX=9606 GN=GFM1 PE=2 SV=1
60	502364	Q86V29|Q86V29_HUMAN	20.81	1	1		71650	Wee1-like protein kinase OS=Homo sapiens OX=9606 GN=WEE1 PE=2 SV=1
52	502402	Q8TBA7|Q8TBA7_HUMAN	30.25	2	1		73827	HSP90AA1 protein (Fragment) OS=Homo sapiens OX=9606 GN=HSP90AA1 PE=2 SV=2
79	503313	sp|Q12955|ANK3_HUMAN	31.4	2	1		480416	Ankyrin-3 OS=Homo sapiens OX=9606 GN=ANK3 PE=1 SV=3
101	501124	B4DMJ2|B4DMJ2_HUMAN	33.8	1	1		27063	60S ribosomal protein L4 OS=Homo sapiens OX=9606 PE=2 SV=1
101	501125	H3BM89|H3BM89_HUMAN	33.8	1	1		37657	60S ribosomal protein L4 OS=Homo sapiens OX=9606 GN=RPL4 PE=1 SV=1
101	501127	B4DMJ6|B4DMJ6_HUMAN	33.8	1	1		46012	60S ribosomal protein L4 OS=Homo sapiens OX=9606 PE=2 SV=1
101	501128	Q53G74|Q53G74_HUMAN	33.8	1	1		47718	60S ribosomal protein L4 (Fragment) OS=Homo sapiens OX=9606 PE=2 SV=1
101	501129	Q59GY2|Q59GY2_HUMAN	33.8	1	1		48996	60S ribosomal protein L4 (Fragment) OS=Homo sapiens OX=9606 PE=2 SV=1
82	501132	Q14222|Q14222_HUMAN	33.57	1	1		24196	EEF1A protein (Fragment) OS=Homo sapiens OX=9606 GN=EEF1A PE=2 SV=1
82	501133	Q96C29|Q96C29_HUMAN	33.57	1	1		26316	Uncharacterized protein (Fragment) OS=Homo sapiens OX=9606 PE=2 SV=1
82	501134	Q8TBL1|Q8TBL1_HUMAN	33.57	1	1		26488	Uncharacterized protein (Fragment) OS=Homo sapiens OX=9606 PE=2 SV=1
82	501135	Q6P082|Q6P082_HUMAN	33.57	1	1		26617	EEF1A1 protein (Fragment) OS=Homo sapiens OX=9606 GN=EEF1A1 PE=2 SV=1
82	501136	Q96CD8|Q96CD8_HUMAN	33.57	1	1		30700	Uncharacterized protein (Fragment) OS=Homo sapiens OX=9606 PE=2 SV=1
82	501137	Q59GP5|Q59GP5_HUMAN	33.57	1	1		36911	Eukaryotic translation elongation factor 1 alpha 2 variant (Fragment) OS=Homo sapiens OX=9606 PE=2 SV=1
82	501138	A0A4D5RBG5|A0A4D5RBG5_HUMAN	33.57	1	1		39061	Elongation factor 1-alpha OS=Homo sapiens OX=9606 PE=3 SV=1
82	501139	Q8IUB0|Q8IUB0_HUMAN	33.57	1	1		38669	CTCL tumor antigen HD-CL-08 OS=Homo sapiens OX=9606 PE=2 SV=1
82	501140	Q53HR1|Q53HR1_HUMAN	33.57	1	1		39256	Eukaryotic translation elongation factor 1 alpha 1 variant (Fragment) OS=Homo sapiens OX=9606 PE=2 SV=1
82	501141	A0A4D5RA76|A0A4D5RA76_HUMAN	33.57	1	1		41307	Elongation factor 1-alpha OS=Homo sapiens OX=9606 PE=3 SV=1
82	501142	B4DNE0|B4DNE0_HUMAN	33.57	1	1		42596	cDNA FLJ52573 highly similar to Elongation factor 1-alpha 1 OS=Homo sapiens OX=9606 PE=2 SV=1
82	501143	Q96RE1|Q96RE1_HUMAN	33.57	1	1		43025	Translation elongation factor 1 alpha 1-like 14 OS=Homo sapiens OX=9606 GN=EEF1A1L14 PE=2 SV=1
82	501144	A0A4D5RAN2|A0A4D5RAN2_HUMAN	33.57	1	1		44785	Tr-type G domain-containing protein OS=Homo sapiens OX=9606 PE=3 SV=1
82	501145	A0A4D5RAC7|A0A4D5RAC7_HUMAN	33.57	1	1		46211	Tr-type G domain-containing protein OS=Homo sapiens OX=9606 PE=4 SV=1
82	501146	A0A7I2V5N4|A0A7I2V5N4_HUMAN	33.57	1	1		47266	Elongation factor 1-alpha OS=Homo sapiens OX=9606 GN=EEF1A1 PE=1 SV=1
82	501147	A0A4D5RAC9|A0A4D5RAC9_HUMAN	33.57	1	1		49398	Elongation factor 1-alpha OS=Homo sapiens OX=9606 PE=3 SV=1
82	501148	A0A7I2V659|A0A7I2V659_HUMAN	33.57	1	1		49824	Elongation factor 1-alpha OS=Homo sapiens OX=9606 GN=EEF1A1 PE=1 SV=1
82	501149	A0A087WVQ9|A0A087WVQ9_HUMAN	33.57	1	1		49870	Elongation factor 1-alpha OS=Homo sapiens OX=9606 GN=EEF1A1 PE=1 SV=2
82	501150	Q53HR5|Q53HR5_HUMAN	33.57	1	1		50125	Elongation factor 1-alpha (Fragment) OS=Homo sapiens OX=9606 PE=2 SV=1
82	501151	Q53G85|Q53G85_HUMAN	33.57	1	1		50113	Elongation factor 1-alpha (Fragment) OS=Homo sapiens OX=9606 PE=2 SV=1
82	501152	A8K9C4|A8K9C4_HUMAN	33.57	1	1		50201	Elongation factor 1-alpha OS=Homo sapiens OX=9606 PE=2 SV=1
82	501153	Q6IPT9|Q6IPT9_HUMAN	33.57	1	1		50185	Elongation factor 1-alpha OS=Homo sapiens OX=9606 GN=EEF1A1 PE=2 SV=1
82	501154	Q53GE9|Q53GE9_HUMAN	33.57	1	1		50111	Elongation factor 1-alpha (Fragment) OS=Homo sapiens OX=9606 PE=2 SV=1
82	501155	Q6IPN6|Q6IPN6_HUMAN	33.57	1	1		50123	Elongation factor 1-alpha OS=Homo sapiens OX=9606 GN=EEF1A1 PE=2 SV=1
82	501156	A0A2U3TZH3|A0A2U3TZH3_HUMAN	33.57	1	1		54341	Elongation factor 1-alpha OS=Homo sapiens OX=9606 GN=EEF1A2 PE=1 SV=1
83	501161	Q03838|Q03838_HUMAN	31.6	1	1		50280	Profilaggrin (Fragment) OS=Homo sapiens OX=9606 GN=FLG PE=2 SV=1
103	501163	B4DUK1|B4DUK1_HUMAN	30.28	1	1		11161	cDNA FLJ51310 moderately similar to Peroxiredoxin-6 OS=Homo sapiens OX=9606 PE=2 SV=1
103	501164	V9HWC7|V9HWC7_HUMAN	30.28	1	1		25035	Epididymis secretory sperm binding protein Li 128m OS=Homo sapiens OX=9606 GN=HEL-S-128m PE=2 SV=1
104	501165	C9JNW5|C9JNW5_HUMAN	30.53	1	1		17543	60S ribosomal protein L24 OS=Homo sapiens OX=9606 GN=RPL24 PE=1 SV=1
104	501166	V9HW01|V9HW01_HUMAN	30.53	1	1		17779	Epididymis secretory protein Li 310 OS=Homo sapiens OX=9606 GN=HEL-S-310 PE=2 SV=1
105	501170	A0A024R2U6|A0A024R2U6_HUMAN	28.11	1	1		92154	RNA binding motif protein 5 isoform CRA_a OS=Homo sapiens OX=9606 GN=RBM5 PE=3 SV=1
106	501174	R9S3C3|R9S3C3_HUMAN	28.52	1	1		18531	p14ARF/p16INK4a fusion protein OS=Homo sapiens OX=9606 GN=p14ARF PE=2 SV=1
84	501176	Q8NI98|Q8NI98_HUMAN	27.41	1	1	Oxidation (M)	10913	Cytoskeletal tropomyosin TM30 OS=Homo sapiens OX=9606 GN=OK/SW-cl.5 PE=2 SV=1
45	501177	H0YKD8|H0YKD8_HUMAN	38.73	2	1		19072	60S ribosomal protein L28 OS=Homo sapiens OX=9606 GN=RPL28 PE=1 SV=1
107	501178	Q59FA2|Q59FA2_HUMAN	28.79	1	1		25625	Serine/arginine-rich splicing factor 1 (Fragment) OS=Homo sapiens OX=9606 PE=2 SV=1
107	501179	A8K1L8|A8K1L8_HUMAN	28.79	1	1		27688	Serine/arginine-rich splicing factor 1 OS=Homo sapiens OX=9606 PE=2 SV=1
108	501184	H7C3Z9|H7C3Z9_HUMAN	26.62	1	1	Oxidation (M)	13497	Anterior gradient protein 2 homolog (Fragment) OS=Homo sapiens OX=9606 GN=AGR2 PE=1 SV=1
108	501185	H7C040|H7C040_HUMAN	26.62	1	1	Oxidation (M)	15036	Anterior gradient protein 3 (Fragment) OS=Homo sapiens OX=9606 GN=AGR3 PE=1 SV=1
108	501186	B5MC62|B5MC62_HUMAN	26.62	1	1	Oxidation (M)	18714	Anterior gradient protein 3 OS=Homo sapiens OX=9606 GN=AGR3 PE=1 SV=1
108	501187	Q53G64|Q53G64_HUMAN	26.62	1	1	Oxidation (M)	19963	Anterior gradient 2 homolog (Fragment) OS=Homo sapiens OX=9606 PE=2 SV=1
108	501188	B2R7D7|B2R7D7_HUMAN	26.62	1	1	Oxidation (M)	20007	cDNA FLJ93394 highly similar to Homo sapiens anterior gradient 2 homolog (Xenopus laevis) (AGR2) mRNA OS=Homo sapiens OX=9606 PE=2 SV=1
108	501189	Q4JM46|Q4JM46_HUMAN	26.62	1	1	Oxidation (M)	19979	AGR2 OS=Homo sapiens OX=9606 GN=AGR2 PE=2 SV=1
108	501190	B5MC07|B5MC07_HUMAN	26.62	1	1	Oxidation (M)	21392	Anterior gradient protein 2 homolog OS=Homo sapiens OX=9606 GN=AGR2 PE=1 SV=1
108	501191	Q4JM47|Q4JM47_HUMAN	26.62	1	1	Oxidation (M)	22238	AGR2 OS=Homo sapiens OX=9606 GN=AGR2 PE=4 SV=1
29	501192	G3V4W0|G3V4W0_HUMAN	41.62	2	2		28916	Heterogeneous nuclear ribonucleoproteins C1/C2 (Fragment) OS=Homo sapiens OX=9606 GN=HNRNPC PE=1 SV=1
29	501193	B4DY08|B4DY08_HUMAN	41.62	2	2		31972	Heterogeneous nuclear ribonucleoproteins C1/C2 OS=Homo sapiens OX=9606 GN=HNRNPC PE=1 SV=1
29	501194	D3DPI2|D3DPI2_HUMAN	41.62	2	2		32314	HCG1641229 isoform CRA_a OS=Homo sapiens OX=9606 GN=hCG_1641229 PE=3 SV=1
29	501195	A8K9A4|A8K9A4_HUMAN	41.62	2	2		33612	cDNA FLJ75154 highly similar to Homo sapiens heterogeneous nuclear ribonucleoprotein C (C1/C2) mRNA OS=Homo sapiens OX=9606 PE=2 SV=1
66	501202	E9PFN4|E9PFN4_HUMAN	21.91	1	1		135303	Anion exchange protein OS=Homo sapiens OX=9606 GN=SLC4A7 PE=1 SV=1
67	501206	M0R2I7|M0R2I7_HUMAN	26.15	1	1		22708	Heterogeneous nuclear ribonucleoprotein M (Fragment) OS=Homo sapiens OX=9606 GN=HNRNPM PE=1 SV=1
67	501207	Q6P2D7|Q6P2D7_HUMAN	26.15	1	1		30457	HNRPM protein (Fragment) OS=Homo sapiens OX=9606 GN=HNRPM PE=2 SV=1
67	501208	M0QZM1|M0QZM1_HUMAN	26.15	1	1		40052	Heterogeneous nuclear ribonucleoprotein M (Fragment) OS=Homo sapiens OX=9606 GN=HNRNPM PE=1 SV=1
67	501209	Q7KYM9|Q7KYM9_HUMAN	26.15	1	1		59966	ORF protein OS=Homo sapiens OX=9606 GN=ORF PE=2 SV=1
67	501210	Q59ES8|Q59ES8_HUMAN	26.15	1	1		65255	Heterogeneous nuclear ribonucleoprotein M isoform a variant (Fragment) OS=Homo sapiens OX=9606 PE=2 SV=1
52	501211	Q20BG7|Q20BG7_HUMAN	21.38	1	1		160943	Cortactin-binding protein 2 (Fragment) OS=Homo sapiens OX=9606 GN=CTTNBP2 PE=4 SV=1
52	501212	Q20BG9|Q20BG9_HUMAN	21.38	1	1		181050	Cortactin-binding protein 2 OS=Homo sapiens OX=9606 GN=CTTNBP2 PE=4 SV=1
53	496391	J3KNE0|J3KNE0_HUMAN	20.5	1	1		197621	RanBP2-like and GRIP domain-containing protein 3 OS=Homo sapiens OX=9606 GN=RGPD3 PE=1 SV=2
53	496397	Q5H9P1|Q5H9P1_HUMAN	20.5	1	1		192379	Uncharacterized protein DKFZp686F1345 (Fragment) OS=Homo sapiens OX=9606 GN=DKFZp686F1345 PE=2 SV=1
4	501021	B4E335|B4E335_HUMAN	131.67	11	7	Oxidation (M); Carbamidomethylation; Mutation	39226	cDNA FLJ52842 highly similar to Actin cytoplasmic 1 OS=Homo sapiens OX=9606 PE=2 SV=1
4	501022	Q53G76|Q53G76_HUMAN	131.67	11	7	Oxidation (M); Carbamidomethylation; Mutation	41721	Beta actin variant (Fragment) OS=Homo sapiens OX=9606 PE=2 SV=1
4	501023	Q1KLZ0|Q1KLZ0_HUMAN	131.67	11	7	Oxidation (M); Carbamidomethylation; Mutation	41737	HCG15971 isoform CRA_a OS=Homo sapiens OX=9606 GN=PS1TP5BP1 PE=2 SV=1
4	501024	Q53G99|Q53G99_HUMAN	131.67	11	7	Oxidation (M); Carbamidomethylation; Mutation	41765	Beta actin variant (Fragment) OS=Homo sapiens OX=9606 PE=2 SV=1
12	501028	E7EXB4|E7EXB4_HUMAN	107.22	5	5		23783	60 kDa heat shock protein mitochondrial (Fragment) OS=Homo sapiens OX=9606 GN=HSPD1 PE=1 SV=1
12	501029	E7ESH4|E7ESH4_HUMAN	107.22	5	5		24927	60 kDa heat shock protein mitochondrial (Fragment) OS=Homo sapiens OX=9606 GN=HSPD1 PE=1 SV=2
12	501030	Q53SE2|Q53SE2_HUMAN	107.22	5	5		25154	Uncharacterized protein HSPD1 (Fragment) OS=Homo sapiens OX=9606 GN=HSPD1 PE=3 SV=1
12	501031	A0A7I2V5K3|A0A7I2V5K3_HUMAN	107.22	5	5		32116	60 kDa chaperonin OS=Homo sapiens OX=9606 GN=HSPD1 PE=1 SV=1
12	501032	A0A7I2YQ71|A0A7I2YQ71_HUMAN	107.22	5	5		33705	60 kDa chaperonin OS=Homo sapiens OX=9606 GN=HSPD1 PE=1 SV=1
12	501033	A0A7I2V369|A0A7I2V369_HUMAN	107.22	5	5		34807	60 kDa chaperonin OS=Homo sapiens OX=9606 GN=HSPD1 PE=1 SV=1
12	501034	A0A7I2V5M1|A0A7I2V5M1_HUMAN	107.22	5	5		40104	60 kDa chaperonin OS=Homo sapiens OX=9606 GN=HSPD1 PE=1 SV=1
12	501035	A0A7I2V599|A0A7I2V599_HUMAN	107.22	5	5		57786	60 kDa chaperonin OS=Homo sapiens OX=9606 GN=HSPD1 PE=1 SV=1
12	501036	A0A7I2V2X6|A0A7I2V2X6_HUMAN	107.22	5	5		57759	60 kDa chaperonin OS=Homo sapiens OX=9606 GN=HSPD1 PE=1 SV=1
12	501037	B3GQS7|B3GQS7_HUMAN	107.22	5	5		60680	60 kDa chaperonin OS=Homo sapiens OX=9606 GN=HSPD1 PE=2 SV=1
12	501038	A0A024R3X4|A0A024R3X4_HUMAN	107.22	5	5		61055	60 kDa chaperonin (Fragment) OS=Homo sapiens OX=9606 GN=HSPD1 PE=2 SV=1
12	501040	C9JL19|C9JL19_HUMAN	103.62	4	4		8991	60 kDa heat shock protein mitochondrial (Fragment) OS=Homo sapiens OX=9606 GN=HSPD1 PE=1 SV=1
12	501041	C9JCQ4|C9JCQ4_HUMAN	103.62	4	4		10279	60 kDa heat shock protein mitochondrial (Fragment) OS=Homo sapiens OX=9606 GN=HSPD1 PE=1 SV=1
12	501042	A0A0S2Z415|A0A0S2Z415_HUMAN	103.62	4	4		18301	Heat shock 60kDa protein 1 isoform 4 OS=Homo sapiens OX=9606 GN=HSPD1 PE=2 SV=1
12	501043	C9JL25|C9JL25_HUMAN	103.62	4	4		19207	60 kDa heat shock protein mitochondrial (Fragment) OS=Homo sapiens OX=9606 GN=HSPD1 PE=1 SV=1
12	501044	A0A7I2YQK6|A0A7I2YQK6_HUMAN	103.62	4	4		51233	60 kDa chaperonin OS=Homo sapiens OX=9606 GN=HSPD1 PE=1 SV=1
11	501045	H3BTN5|H3BTN5_HUMAN	71.15	3	3	Carbamidomethylation	53045	Pyruvate kinase (Fragment) OS=Homo sapiens OX=9606 GN=PKM PE=1 SV=1
11	501046	A0A024R5Z9|A0A024R5Z9_HUMAN	71.15	3	3	Carbamidomethylation	58062	Pyruvate kinase OS=Homo sapiens OX=9606 GN=PKM2 PE=3 SV=1
11	501047	V9HWB8|V9HWB8_HUMAN	71.15	3	3	Carbamidomethylation	57937	Pyruvate kinase OS=Homo sapiens OX=9606 GN=HEL-S-30 PE=2 SV=1
35	501052	B3KS36|B3KS36_HUMAN	50.06	2	2		40145	cDNA FLJ35376 fis clone SKMUS2004044 highly similar to Homo sapiens ribosomal protein L3 (RPL3) transcript variant 2 mRNA OS=Homo sapiens OX=9606 PE=2 SV=1
36	501056	A0A024R4F1|A0A024R4F1_HUMAN	54.07	2	2		47169	2-phospho-D-glycerate hydro-lyase OS=Homo sapiens OX=9606 GN=HEL-S-17 PE=2 SV=1
35	501059	H7C422|H7C422_HUMAN	50.06	2	2		34968	60S ribosomal protein L3 (Fragment) OS=Homo sapiens OX=9606 GN=RPL3 PE=1 SV=1
35	501060	Q96QL0|Q96QL0_HUMAN	50.06	2	2		46120	Ribosomal protein L3 OS=Homo sapiens OX=9606 GN=RPL3 PE=2 SV=1
18	501061	A0A1W2PP22|A0A1W2PP22_HUMAN	59.25	1	1		19643	Heterogeneous nuclear ribonucleoprotein U (Fragment) OS=Homo sapiens OX=9606 GN=HNRNPU PE=1 SV=1
81	501062	D6RCF2|D6RCF2_HUMAN	55.92	1	1		17575	Histone H2A OS=Homo sapiens OX=9606 GN=MACROH2A1 PE=1 SV=1
95	501063	A8MUD9|A8MUD9_HUMAN	56.42	1	1		24433	60S ribosomal protein L7 OS=Homo sapiens OX=9606 GN=RPL7 PE=1 SV=1
95	501064	O95036|O95036_HUMAN	56.42	1	1		29037	Similar to 60S ribosomal protein L7; similar to P18124 (PID:d133021) OS=Homo sapiens OX=9606 GN=WUGSC:H_RG054D04.1 PE=3 SV=1
95	501065	A0A024R814|A0A024R814_HUMAN	56.42	1	1		30438	Ribosomal protein L7 isoform CRA_a OS=Homo sapiens OX=9606 GN=RPL7 PE=3 SV=1
24	501066	B7Z2I6|B7Z2I6_HUMAN	51.31	1	1		53484	Transferrin receptor protein 1 OS=Homo sapiens OX=9606 PE=2 SV=1
24	501067	G3V0E5|G3V0E5_HUMAN	51.31	1	1		75964	Transferrin receptor protein 1 OS=Homo sapiens OX=9606 GN=TFRC PE=1 SV=1
24	501068	A8K6Q8|A8K6Q8_HUMAN	51.31	1	1		84873	Transferrin receptor protein 1 OS=Homo sapiens OX=9606 PE=2 SV=1
17	501069	B4E388|B4E388_HUMAN	75.5	3	3		61531	cDNA FLJ54407 highly similar to Heat shock 70 kDa protein 1 OS=Homo sapiens OX=9606 PE=2 SV=1
37	501070	Q5SRT3|Q5SRT3_HUMAN	59.17	2	2		26923	Chloride intracellular channel protein OS=Homo sapiens OX=9606 GN=CLIC1 PE=2 SV=2
37	501071	Q53FB0|Q53FB0_HUMAN	59.17	2	2		27015	Chloride intracellular channel protein (Fragment) OS=Homo sapiens OX=9606 PE=2 SV=1
98	501072	E9PKT2|E9PKT2_HUMAN	47.44	1	1		4691	60S ribosomal protein L27a OS=Homo sapiens OX=9606 GN=RPL27A PE=1 SV=1
98	501073	H0YF34|H0YF34_HUMAN	47.44	1	1		4724	60S ribosomal protein L27a (Fragment) OS=Homo sapiens OX=9606 GN=RPL27A PE=1 SV=1
98	501075	Q9BQQ5|Q9BQQ5_HUMAN	47.44	1	1		12015	Ribosomal protein L27a OS=Homo sapiens OX=9606 GN=L27a PE=4 SV=1
98	501076	E9PLL6|E9PLL6_HUMAN	47.44	1	1		12201	60S ribosomal protein L27a OS=Homo sapiens OX=9606 GN=RPL27A PE=1 SV=1
98	501077	E9PLX7|E9PLX7_HUMAN	47.44	1	1		12477	60S ribosomal protein L27a OS=Homo sapiens OX=9606 GN=RPL27A PE=1 SV=1
98	501078	Q6NZ52|Q6NZ52_HUMAN	47.44	1	1		16478	60S ribosomal protein L27a OS=Homo sapiens OX=9606 GN=RPL27A PE=2 SV=1
98	501079	B4DRW5|B4DRW5_HUMAN	47.44	1	1		35073	cDNA FLJ60028 highly similar to Sodium/potassium-transporting ATPase alpha-2 chain OS=Homo sapiens OX=9606 PE=2 SV=1
82	501080	Q53G89|Q53G89_HUMAN	33.57	1	1		46894	Elongation factor 1-alpha (Fragment) OS=Homo sapiens OX=9606 PE=2 SV=1
41	501081	C9J3N8|C9J3N8_HUMAN	43.15	1	1		3888	Heat shock protein beta-1 OS=Homo sapiens OX=9606 GN=HSPB1 PE=1 SV=1
41	501082	B4DL87|B4DL87_HUMAN	43.15	1	1		18536	Heat shock 27 kDa protein OS=Homo sapiens OX=9606 PE=2 SV=1
41	501083	A0A6Q8PFK8|A0A6Q8PFK8_HUMAN	43.15	1	1		21882	Heat shock protein beta-1 OS=Homo sapiens OX=9606 GN=HSPB1 PE=1 SV=1
41	501084	V9HW43|V9HW43_HUMAN	43.15	1	1		22783	Heat shock 27 kDa protein OS=Homo sapiens OX=9606 GN=HEL-S-102 PE=2 SV=1
41	501085	A0A6Q8PGK1|A0A6Q8PGK1_HUMAN	43.15	1	1		23705	Heat shock 27 kDa protein OS=Homo sapiens OX=9606 GN=HSPB1 PE=1 SV=1
99	501086	M0R0X0|M0R0X0_HUMAN	42.38	1	1		11430	Tubulin beta-4A chain OS=Homo sapiens OX=9606 GN=TUBB4A PE=1 SV=1
99	501087	M0QY85|M0QY85_HUMAN	42.38	1	1		11788	Tubulin beta-4A chain (Fragment) OS=Homo sapiens OX=9606 GN=TUBB4A PE=1 SV=1
99	501088	M0QY37|M0QY37_HUMAN	42.38	1	1		12031	Tubulin beta-4A chain OS=Homo sapiens OX=9606 GN=TUBB4A PE=1 SV=1
99	501089	M0QX14|M0QX14_HUMAN	42.38	1	1		12215	Tubulin beta-4A chain OS=Homo sapiens OX=9606 GN=TUBB4A PE=1 SV=1
99	501090	A0A075B724|A0A075B724_HUMAN	42.38	1	1		12999	Tubulin beta-8 chain OS=Homo sapiens OX=9606 GN=TUBB8 PE=1 SV=1
99	501091	M0QZL7|M0QZL7_HUMAN	42.38	1	1		16568	Tubulin beta-4A chain (Fragment) OS=Homo sapiens OX=9606 GN=TUBB4A PE=1 SV=8
99	501092	M0R278|M0R278_HUMAN	42.38	1	1		17642	Tubulin beta-4A chain (Fragment) OS=Homo sapiens OX=9606 GN=TUBB4A PE=1 SV=1
99	501093	B4DNW1|B4DNW1_HUMAN	42.38	1	1		21031	cDNA FLJ59940 highly similar to Tubulin beta-2C chain OS=Homo sapiens OX=9606 PE=2 SV=1
99	501094	B4DJ43|B4DJ43_HUMAN	42.38	1	1		40567	cDNA FLJ53341 highly similar to Tubulin beta-4 chain OS=Homo sapiens OX=9606 PE=2 SV=1
99	501095	B4DE77|B4DE77_HUMAN	42.38	1	1		45842	Tubulin beta chain OS=Homo sapiens OX=9606 PE=2 SV=1
99	501096	Q8IZ29|Q8IZ29_HUMAN	42.38	1	1		49840	Tubulin beta chain OS=Homo sapiens OX=9606 GN=TUBB2C PE=2 SV=1
42	501097	B4DEI3|B4DEI3_HUMAN	42.09	1	1		16695	cDNA FLJ57715 highly similar to Voltage-dependent anion-selective channel protein 1 OS=Homo sapiens OX=9606 PE=2 SV=1
42	501098	C9JI87|C9JI87_HUMAN	42.09	1	1		20275	Voltage-dependent anion-selective channel protein 1 (Fragment) OS=Homo sapiens OX=9606 GN=VDAC1 PE=1 SV=6
42	501099	A0A1L1UHR1|A0A1L1UHR1_HUMAN	42.09	1	1		30773	Voltage-dependent anion-selective channel protein 1 OS=Homo sapiens OX=9606 PE=2 SV=1
42	501100	B3KTS5|B3KTS5_HUMAN	42.09	1	1		30744	Voltage-dependent anion-selective channel protein 1 OS=Homo sapiens OX=9606 PE=2 SV=1
43	501111	sp|P0DOY3|IGLC3_HUMAN	37.94	1	1	Carbamidomethylation	11266	Immunoglobulin lambda constant 3 OS=Homo sapiens OX=9606 GN=IGLC3 PE=1 SV=1
44	501116	A0A0S2Z3C4|A0A0S2Z3C4_HUMAN	37.12	1	1	Oxidation (M)	19327	ADP/ATP translocase (Fragment) OS=Homo sapiens OX=9606 GN=SLC25A4 PE=2 SV=1
44	501117	A8K787|A8K787_HUMAN	37.12	1	1	Oxidation (M)	33081	ADP/ATP translocase OS=Homo sapiens OX=9606 PE=2 SV=1
44	501118	A0A0S2Z3H3|A0A0S2Z3H3_HUMAN	37.12	1	1	Oxidation (M)	33065	ADP/ATP translocase (Fragment) OS=Homo sapiens OX=9606 GN=SLC25A4 PE=2 SV=1
44	501119	Q6I9V5|Q6I9V5_HUMAN	37.12	1	1	Oxidation (M)	32866	ADP/ATP translocase OS=Homo sapiens OX=9606 GN=SLC25A6 PE=2 SV=1
44	501120	Q59EI9|Q59EI9_HUMAN	37.12	1	1	Oxidation (M)	35383	ADP/ATP translocase (Fragment) OS=Homo sapiens OX=9606 PE=2 SV=1
44	501121	Q6NVC0|Q6NVC0_HUMAN	37.12	1	1	Oxidation (M)	35294	ADP/ATP translocase (Fragment) OS=Homo sapiens OX=9606 GN=SLC25A5 PE=2 SV=1
14	501122	Q6PIL8|Q6PIL8_HUMAN	52.13	2	2	Carbamidomethylation	25834	IGK@ protein OS=Homo sapiens OX=9606 GN=IGK@ PE=1 SV=1
55	494427	F8W079|F8W079_HUMAN	47.75	1	1	Oxidation (M)	30170	ATP synthase subunit beta mitochondrial (Fragment) OS=Homo sapiens OX=9606 GN=ATP5F1B PE=1 SV=1
55	494428	H0YH81|H0YH81_HUMAN	47.75	1	1	Oxidation (M)	38258	ATP synthase subunit beta (Fragment) OS=Homo sapiens OX=9606 GN=ATP5F1B PE=1 SV=1
55	494429	Q0QEN7|Q0QEN7_HUMAN	47.75	1	1	Oxidation (M)	48113	ATP synthase subunit beta (Fragment) OS=Homo sapiens OX=9606 GN=ATP5B PE=2 SV=1
55	494430	V9HW31|V9HW31_HUMAN	47.75	1	1	Oxidation (M)	56560	ATP synthase subunit beta OS=Homo sapiens OX=9606 GN=HEL-S-271 PE=2 SV=1
37	494431	K7EQL6|K7EQL6_HUMAN	25.3	1	1		143937	Ubiquitinyl hydrolase 1 OS=Homo sapiens OX=9606 GN=USP32 PE=1 SV=1
22	494432	E7ESK7|E7ESK7_HUMAN	39.38	1	1		15697	14-3-3 protein zeta/delta (Fragment) OS=Homo sapiens OX=9606 GN=YWHAZ PE=1 SV=1
22	494433	B0AZS6|B0AZS6_HUMAN	39.38	1	1		19072	14-3-3 protein zeta/delta OS=Homo sapiens OX=9606 GN=YWHAZ PE=1 SV=1
22	494434	D0PNI1|D0PNI1_HUMAN	39.38	1	1		27745	Epididymis luminal protein 4 OS=Homo sapiens OX=9606 GN=YWHAZ PE=2 SV=1
22	494435	E7EX29|E7EX29_HUMAN	39.38	1	1		28037	14-3-3 protein zeta/delta (Fragment) OS=Homo sapiens OX=9606 GN=YWHAZ PE=1 SV=1
57	494436	A0A6Q8PF80|A0A6Q8PF80_HUMAN	37.46	1	1		38641	Prelamin-A/C OS=Homo sapiens OX=9606 GN=LMNA PE=1 SV=1
96	494439	I4AY87|I4AY87_HUMAN	54.51	1	1		12476	Epididymis secretory sperm binding protein (Fragment) OS=Homo sapiens OX=9606 GN=MIF PE=2 SV=1
23	494450	F5GZS6|F5GZS6_HUMAN	50.9	2	1		64873	4F2 cell-surface antigen heavy chain OS=Homo sapiens OX=9606 GN=SLC3A2 PE=1 SV=1
23	494451	A0A7P0T9F7|A0A7P0T9F7_HUMAN	50.9	2	1		65241	4F2 cell-surface antigen heavy chain OS=Homo sapiens OX=9606 GN=SLC3A2 PE=4 SV=1
23	494452	A0A7P0Z4A0|A0A7P0Z4A0_HUMAN	50.9	2	1		66583	4F2 cell-surface antigen heavy chain OS=Homo sapiens OX=9606 GN=SLC3A2 PE=4 SV=1
23	494455	A0A7P0Z4P5|A0A7P0Z4P5_HUMAN	50.9	2	1		70479	4F2 cell-surface antigen heavy chain OS=Homo sapiens OX=9606 GN=SLC3A2 PE=4 SV=1
59	494456	B4DHB3|B4DHB3_HUMAN	34.68	1	1	Oxidation (M)	29992	Phosphoglycerate kinase OS=Homo sapiens OX=9606 PE=2 SV=1
59	494459	B4E1H9|B4E1H9_HUMAN	34.68	1	1	Oxidation (M)	35045	Phosphoglycerate kinase OS=Homo sapiens OX=9606 PE=2 SV=1
59	494460	V9HW85|V9HW85_HUMAN	34.68	1	1	Oxidation (M)	44895	Phosphoglycerate kinase OS=Homo sapiens OX=9606 GN=HEL-S-272 PE=2 SV=1
59	494461	V9HWF4|V9HWF4_HUMAN	34.68	1	1	Oxidation (M)	44615	Phosphoglycerate kinase OS=Homo sapiens OX=9606 GN=HEL-S-68p PE=2 SV=1
59	494462	A0A140VJR3|A0A140VJR3_HUMAN	34.68	1	1	Oxidation (M)	44796	Phosphoglycerate kinase OS=Homo sapiens OX=9606 PE=2 SV=1
60	494463	A0A024R8W0|A0A024R8W0_HUMAN	34.01	1	1		46871	RNA helicase OS=Homo sapiens OX=9606 GN=DDX48 PE=3 SV=1
61	494464	B3KTQ9|B3KTQ9_HUMAN	32.42	1	1		21253	Procollagen-proline 2-oxoglutarate 4-dioxygenase (Proline 4-hydroxylase) beta polypeptide isoform CRA_b OS=Homo sapiens OX=9606 GN=P4HB PE=2 SV=1
61	494465	Q96C96|Q96C96_HUMAN	32.42	1	1		31463	p4HB protein (Fragment) OS=Homo sapiens OX=9606 GN=P4HB PE=2 SV=2
61	494466	H0Y3Z3|H0Y3Z3_HUMAN	32.42	1	1		47440	Protein disulfide-isomerase OS=Homo sapiens OX=9606 GN=P4HB PE=1 SV=2
61	494467	B4DLN6|B4DLN6_HUMAN	32.42	1	1		51188	cDNA FLJ59033 highly similar to Protein disulfide-isomerase OS=Homo sapiens OX=9606 PE=2 SV=1
61	494468	B4DUA5|B4DUA5_HUMAN	32.42	1	1		51253	cDNA FLJ59430 highly similar to Protein disulfide-isomerase OS=Homo sapiens OX=9606 PE=2 SV=1
61	494469	H7BZ94|H7BZ94_HUMAN	32.42	1	1		52502	Protein disulfide-isomerase OS=Homo sapiens OX=9606 GN=P4HB PE=1 SV=2
62	494475	H0Y6E7|H0Y6E7_HUMAN	30.08	1	1		31865	RNA-binding motif protein X chromosome (Fragment) OS=Homo sapiens OX=9606 GN=RBMX PE=1 SV=2
62	494476	H3BT71|H3BT71_HUMAN	30.08	1	1		32197	RNA-binding motif protein X chromosome OS=Homo sapiens OX=9606 GN=RBMX PE=1 SV=1
63	494479	B2RDY9|B2RDY9_HUMAN	29.32	1	1		51615	Adenylyl cyclase-associated protein OS=Homo sapiens OX=9606 PE=2 SV=1
64	494480	B4DMC6|B4DMC6_HUMAN	29.04	1	1		42935	cDNA FLJ60696 highly similar to Elongation factor 2 OS=Homo sapiens OX=9606 PE=2 SV=1
64	494481	B4DRE8|B4DRE8_HUMAN	29.04	1	1		55670	cDNA FLJ58164 highly similar to Elongation factor 2 OS=Homo sapiens OX=9606 PE=2 SV=1
64	494482	B4DPU3|B4DPU3_HUMAN	29.04	1	1		62850	cDNA FLJ56548 highly similar to Elongation factor 2 OS=Homo sapiens OX=9606 PE=2 SV=1
114	494483	Q6PK56|Q6PK56_HUMAN	23.37	1	1		64781	EEF2 protein (Fragment) OS=Homo sapiens OX=9606 GN=EEF2 PE=2 SV=1
114	494484	A0A384N6H1|A0A384N6H1_HUMAN	23.37	1	1		95338	Epididymis secretory sperm binding protein OS=Homo sapiens OX=9606 PE=2 SV=1
13	494486	sp|P0DPK2|H3Y1_HUMAN	38.66	2	1	Mutation	15423	Histone H3.Y OS=Homo sapiens OX=9606 GN=H3Y1 PE=1 SV=1
31	494487	A0A024RA28|A0A024RA28_HUMAN	53	2	2		31163	Heterogeneous nuclear ribonucleoprotein A2/B1 isoform CRA_d OS=Homo sapiens OX=9606 GN=HNRNPA2B1 PE=1 SV=1
31	494488	A0A7I2V4N1|A0A7I2V4N1_HUMAN	53	2	2		32487	Heterogeneous nuclear ribonucleoproteins A2/B1 OS=Homo sapiens OX=9606 GN=HNRNPA2B1 PE=1 SV=1
31	494489	A0A7I2V3P1|A0A7I2V3P1_HUMAN	53	2	2		33271	Heterogeneous nuclear ribonucleoproteins A2/B1 OS=Homo sapiens OX=9606 GN=HNRNPA2B1 PE=1 SV=1
31	494490	A0A7I2V4I6|A0A7I2V4I6_HUMAN	53	2	2		34260	Heterogeneous nuclear ribonucleoproteins A2/B1 OS=Homo sapiens OX=9606 GN=HNRNPA2B1 PE=1 SV=1
38	494491	A0A7I2V3P7|A0A7I2V3P7_HUMAN	37.64	2	2		34566	Heterogeneous nuclear ribonucleoproteins A2/B1 OS=Homo sapiens OX=9606 GN=HNRNPA2B1 PE=1 SV=1
31	494492	A0A7I2V323|A0A7I2V323_HUMAN	53	2	2		35222	Heterogeneous nuclear ribonucleoproteins A2/B1 OS=Homo sapiens OX=9606 GN=HNRNPA2B1 PE=1 SV=1
31	494493	A0A384NL58|A0A384NL58_HUMAN	53	2	2		37460	Heterogeneous nuclear ribonucleoproteins A2/B1 OS=Homo sapiens OX=9606 PE=2 SV=1
87	494499	A0A0G2JN73|A0A0G2JN73_HUMAN	24.61	1	1		56346	Mucin-like protein 3 OS=Homo sapiens OX=9606 GN=MUCL3 PE=1 SV=1
87	494500	A0A1B0GV46|A0A1B0GV46_HUMAN	24.61	1	1		158331	Mucin-like protein 3 OS=Homo sapiens OX=9606 GN=MUCL3 PE=1 SV=1
66	494503	D6RI02|D6RI02_HUMAN	27.58	1	1	Oxidation (M)	10615	40S ribosomal protein S3a OS=Homo sapiens OX=9606 GN=RPS3A PE=1 SV=1
66	494504	B7Z3M5|B7Z3M5_HUMAN	27.58	1	1	Oxidation (M)	20294	40S ribosomal protein S3a OS=Homo sapiens OX=9606 GN=RPS3A PE=2 SV=1
66	494505	H0Y8L7|H0Y8L7_HUMAN	27.58	1	1	Oxidation (M)	22137	40S ribosomal protein S3a (Fragment) OS=Homo sapiens OX=9606 GN=RPS3A PE=1 SV=1
66	494506	E9PFI5|E9PFI5_HUMAN	27.58	1	1	Oxidation (M)	23747	40S ribosomal protein S3a OS=Homo sapiens OX=9606 GN=RPS3A PE=1 SV=1
66	494507	H0Y9Y4|H0Y9Y4_HUMAN	27.58	1	1	Oxidation (M)	23528	40S ribosomal protein S3a (Fragment) OS=Homo sapiens OX=9606 GN=RPS3A PE=1 SV=1
66	494508	D6RG13|D6RG13_HUMAN	27.58	1	1	Oxidation (M)	25608	40S ribosomal protein S3a (Fragment) OS=Homo sapiens OX=9606 GN=RPS3A PE=1 SV=1
66	494509	A8K4W0|A8K4W0_HUMAN	27.58	1	1	Oxidation (M)	29955	40S ribosomal protein S3a OS=Homo sapiens OX=9606 GN=RPS3A PE=2 SV=1
66	494510	Q6NXR8|Q6NXR8_HUMAN	27.58	1	1	Oxidation (M)	29975	40S ribosomal protein S3a OS=Homo sapiens OX=9606 GN=RPS3A PE=2 SV=1
46	494511	sp|Q8IWZ6|BBS7_HUMAN	24.42	1	1		80353	Bardet-Biedl syndrome 7 protein OS=Homo sapiens OX=9606 GN=BBS7 PE=1 SV=2
67	494514	V9HW56|V9HW56_HUMAN	27.03	1	1	Oxidation (M)	28522	Epididymis secretory protein Li 108 OS=Homo sapiens OX=9606 GN=HEL-S-108 PE=2 SV=1
67	494515	A0A2R8YHD2|A0A2R8YHD2_HUMAN	27.03	1	1	Oxidation (M)	28705	Tropomyosin alpha-4 chain (Fragment) OS=Homo sapiens OX=9606 GN=TPM4 PE=1 SV=2
67	494516	V9HW25|V9HW25_HUMAN	27.03	1	1	Oxidation (M)	32990	Epididymis secretory protein Li 273 OS=Homo sapiens OX=9606 GN=HEL-S-273 PE=2 SV=1
67	494517	sp|P07951|TPM2_HUMAN	27.03	1	1	Oxidation (M)	32851	Tropomyosin beta chain OS=Homo sapiens OX=9606 GN=TPM2 PE=1 SV=1
87	494518	A0A1U9X7N1|A0A1U9X7N1_HUMAN	24.61	1	1		151155	DPCR1 OS=Homo sapiens OX=9606 PE=4 SV=1
87	494519	A0A1U9X7M7|A0A1U9X7M7_HUMAN	24.61	1	1		151168	DPCR1 OS=Homo sapiens OX=9606 PE=4 SV=1
87	494520	A0A1U9X7M5|A0A1U9X7M5_HUMAN	24.61	1	1		151255	DPCR1 OS=Homo sapiens OX=9606 PE=4 SV=1
87	494521	E9PEI6|E9PEI6_HUMAN	24.61	1	1		151168	DPCR1 OS=Homo sapiens OX=9606 GN=MUCL3 PE=1 SV=1
87	494522	A0A1U9X7M3|A0A1U9X7M3_HUMAN	24.61	1	1		151055	DPCR1 OS=Homo sapiens OX=9606 PE=4 SV=1
87	494523	A0A1U9X7M6|A0A1U9X7M6_HUMAN	24.61	1	1		151417	DPCR1 OS=Homo sapiens OX=9606 PE=4 SV=1
11	494524	B4DRT3|B4DRT3_HUMAN	71.15	3	3	Carbamidomethylation	55927	Pyruvate kinase OS=Homo sapiens OX=9606 PE=2 SV=1
37	494527	K7EN13|K7EN13_HUMAN	25.3	1	1		19318	Ubiquitin carboxyl-terminal hydrolase 32 (Fragment) OS=Homo sapiens OX=9606 GN=USP32 PE=1 SV=1
37	494529	Q6IRT0|Q6IRT0_HUMAN	25.3	1	1		40736	USP32 protein (Fragment) OS=Homo sapiens OX=9606 GN=USP32 PE=2 SV=1
37	494530	Q4VC15|Q4VC15_HUMAN	25.3	1	1		43227	USP32 protein (Fragment) OS=Homo sapiens OX=9606 GN=USP32 PE=2 SV=1
37	494531	Q1K9C9|Q1K9C9_HUMAN	25.3	1	1		65648	Oncogene OS=Homo sapiens OX=9606 GN=tre PE=2 SV=1
73	494532	E5RHH1|E5RHH1_HUMAN	24.41	1	1		4528	60S ribosomal protein L26-like 1 (Fragment) OS=Homo sapiens OX=9606 GN=RPL26L1 PE=1 SV=8
73	494533	J3KSS0|J3KSS0_HUMAN	24.41	1	1		7575	60S ribosomal protein L26 OS=Homo sapiens OX=9606 GN=RPL26 PE=3 SV=1
73	494534	J3QQQ9|J3QQQ9_HUMAN	24.41	1	1		12692	KOW domain-containing protein OS=Homo sapiens OX=9606 PE=3 SV=1
73	494535	J3QRI7|J3QRI7_HUMAN	24.41	1	1		12630	60S ribosomal protein L26 (Fragment) OS=Homo sapiens OX=9606 GN=RPL26 PE=3 SV=1
73	494536	J3QQV1|J3QQV1_HUMAN	24.41	1	1		12934	60S ribosomal protein L26 OS=Homo sapiens OX=9606 GN=RPL26 PE=3 SV=1
73	494537	E5RIT6|E5RIT6_HUMAN	24.41	1	1		15207	60S ribosomal protein L26-like 1 (Fragment) OS=Homo sapiens OX=9606 GN=RPL26L1 PE=1 SV=1
73	494538	J3QRC4|J3QRC4_HUMAN	24.41	1	1		15759	60S ribosomal protein L26 (Fragment) OS=Homo sapiens OX=9606 GN=RPL26 PE=3 SV=1
73	494539	A0A024RBF6|A0A024RBF6_HUMAN	24.41	1	1		17271	HCG26523 isoform CRA_a OS=Homo sapiens OX=9606 GN=hCG_26523 PE=3 SV=1
73	494540	Q6IBH6|Q6IBH6_HUMAN	24.41	1	1		17244	RPL26 protein OS=Homo sapiens OX=9606 GN=RPL26 PE=2 SV=1
74	494544	Q8TBW1|Q8TBW1_HUMAN	24.45	1	1		42753	Uncharacterized protein (Fragment) OS=Homo sapiens OX=9606 PE=2 SV=1
87	494545	A8K3Q9|A8K3Q9_HUMAN	24.61	1	1		23455	60S ribosomal protein L14 OS=Homo sapiens OX=9606 PE=1 SV=1
87	494546	Q6IPH7|Q6IPH7_HUMAN	24.61	1	1		23787	60S ribosomal protein L14 OS=Homo sapiens OX=9606 GN=RPL14 PE=2 SV=1
48	494547	H0YDU4|H0YDU4_HUMAN	24.8	1	1		27757	Nucleolar protein 56 (Fragment) OS=Homo sapiens OX=9606 GN=NOP56 PE=1 SV=1
48	494552	A0PJ92|A0PJ92_HUMAN	24.8	1	1		49757	NOP56 protein (Fragment) OS=Homo sapiens OX=9606 GN=NOP56 PE=2 SV=1
48	494553	A0A494C128|A0A494C128_HUMAN	24.8	1	1		53050	Nucleolar protein 56 OS=Homo sapiens OX=9606 GN=NOP56 PE=1 SV=1
48	494555	F1T0G2|F1T0G2_HUMAN	24.8	1	1		73734	HHIP-like protein 1 OS=Homo sapiens OX=9606 GN=HHIPL1 PE=2 SV=1
48	494557	F1T0G3|F1T0G3_HUMAN	24.8	1	1		86731	HHIP-like protein 1 OS=Homo sapiens OX=9606 GN=HHIPL1 PE=2 SV=1
39	494566	Q6VB86|Q6VB86_HUMAN	23.35	1	1		53199	FOXD4 OS=Homo sapiens OX=9606 GN=FOXD4 PE=2 SV=1
77	494651	B3KU23|B3KU23_HUMAN	22.64	1	1	Oxidation (M)	69737	cDNA FLJ39097 fis clone NTONG2000977 highly similar to Neurolysin mitochondrial OS=Homo sapiens OX=9606 PE=2 SV=1
77	494652	A8K9T8|A8K9T8_HUMAN	22.64	1	1	Oxidation (M)	80678	cDNA FLJ76106 highly similar to Homo sapiens neurolysin (metallopeptidase M3 family) (NLN) mRNA OS=Homo sapiens OX=9606 PE=2 SV=1
78	494653	A0A140T963|A0A140T963_HUMAN	22.23	1	1		25416	RNF103-CHMP3 readthrough (Fragment) OS=Homo sapiens OX=9606 GN=RNF103-CHMP3 PE=3 SV=1
79	494658	B4DNY8|B4DNY8_HUMAN	22.32	1	1		9048	cDNA FLJ51013 highly similar to 60S ribosomal protein L6 OS=Homo sapiens OX=9606 PE=2 SV=1
80	494662	F5GZK9|F5GZK9_HUMAN	21.32	1	1		42515	mRNA-decapping enzyme 1B OS=Homo sapiens OX=9606 GN=DCP1B PE=1 SV=1
79	494663	F8VZA3|F8VZA3_HUMAN	22.32	1	1		11571	60S ribosomal protein L6 (Fragment) OS=Homo sapiens OX=9606 GN=RPL6 PE=1 SV=1
63	494664	A7BI36|A7BI36_HUMAN	21.21	1	1		165748	p180/ribosome receptor OS=Homo sapiens OX=9606 GN=RRBP1 PE=2 SV=2
79	494665	F8VWR1|F8VWR1_HUMAN	22.32	1	1		13204	60S ribosomal protein L6 (Fragment) OS=Homo sapiens OX=9606 GN=RPL6 PE=1 SV=2
79	494666	F8VU16|F8VU16_HUMAN	22.32	1	1		13448	60S ribosomal protein L6 (Fragment) OS=Homo sapiens OX=9606 GN=RPL6 PE=1 SV=1
79	494669	F8VZ45|F8VZ45_HUMAN	22.32	1	1		17800	60S ribosomal protein L6 (Fragment) OS=Homo sapiens OX=9606 GN=RPL6 PE=1 SV=1
84	494672	H0YCZ2|H0YCZ2_HUMAN	20.51	1	1		155090	Kinetochore scaffold 1 (Fragment) OS=Homo sapiens OX=9606 GN=KNL1 PE=1 SV=1
34	494675	H7C1J2|H7C1J2_HUMAN	20.75	1	1		26471	Deoxynucleotidyltransferase terminal-interacting protein 1 (Fragment) OS=Homo sapiens OX=9606 GN=DNTTIP1 PE=1 SV=1
79	494687	A0A024RBK3|A0A024RBK3_HUMAN	22.32	1	1		32728	60S ribosomal protein L6 OS=Homo sapiens OX=9606 GN=RPL6 PE=3 SV=1
79	494688	Q8N5Z7|Q8N5Z7_HUMAN	22.32	1	1		32726	60S ribosomal protein L6 OS=Homo sapiens OX=9606 GN=RPL6 PE=1 SV=1
45	494700	O60251|O60251_HUMAN	38.73	2	1		6170	Ribosomal protein L28 (Fragment) OS=Homo sapiens OX=9606 PE=4 SV=1
29	494744	G3V575|G3V575_HUMAN	41.62	2	2		20366	Heterogeneous nuclear ribonucleoproteins C1/C2 (Fragment) OS=Homo sapiens OX=9606 GN=HNRNPC PE=1 SV=1
29	494768	B2R5W2|B2R5W2_HUMAN	41.62	2	2		31948	Heterogeneous nuclear ribonucleoproteins C1/C2 OS=Homo sapiens OX=9606 GN=HNRNPC PE=1 SV=1
29	494771	B3KX96|B3KX96_HUMAN	41.62	2	2		32330	cDNA FLJ45003 fis clone BRAWH3011623 highly similar to Heterogeneous nuclear ribonucleoproteins C OS=Homo sapiens OX=9606 PE=2 SV=1
128	494840	B9EG74|B9EG74_HUMAN	20.73	1	1		214905	CDK5 regulatory subunit associated protein 2 OS=Homo sapiens OX=9606 GN=CDK5RAP2 PE=2 SV=1
39	495144	B4DQZ5|B4DQZ5_HUMAN	23.35	1	1		133382	cDNA FLJ51634 highly similar to Integrator complex subunit 2 OS=Homo sapiens OX=9606 PE=2 SV=1
39	495145	J3KMZ7|J3KMZ7_HUMAN	23.35	1	1		133379	Integrator complex subunit 2 OS=Homo sapiens OX=9606 GN=INTS2 PE=1 SV=1
85	495154	A0A7I2V2R3|A0A7I2V2R3_HUMAN	31.14	2	2		35412	Heterogeneous nuclear ribonucleoprotein A3 OS=Homo sapiens OX=9606 GN=HNRNPA3 PE=1 SV=1
85	495157	A0A7I2V4J6|A0A7I2V4J6_HUMAN	22.12	1	1		39538	Heterogeneous nuclear ribonucleoprotein A3 OS=Homo sapiens OX=9606 GN=HNRNPA3 PE=1 SV=1
85	495159	A0A7I2V4G0|A0A7I2V4G0_HUMAN	31.14	2	2		41283	Heterogeneous nuclear ribonucleoprotein A3 OS=Homo sapiens OX=9606 GN=HNRNPA3 PE=1 SV=1
35	495270	sp|Q8NCF5|NF2IP_HUMAN	22.8	1	1		45817	NFATC2-interacting protein OS=Homo sapiens OX=9606 GN=NFATC2IP PE=1 SV=1
61	495343	A0A0U1RQF0|A0A0U1RQF0_HUMAN	30.71	2	1		273196	3-hydroxyacyl-[acyl-carrier-protein] dehydratase OS=Homo sapiens OX=9606 GN=FASN PE=1 SV=1
39	495546	B2RU26|B2RU26_HUMAN	23.35	1	1		304673	Thyroglobulin OS=Homo sapiens OX=9606 GN=TG PE=2 SV=1
53	495708	Q658K0|Q658K0_HUMAN	20.5	1	1		107641	Vacuolar protein sorting-associated protein 11 homolog OS=Homo sapiens OX=9606 GN=DKFZp564P2364 PE=2 SV=1
35	495721	Q59GG9|Q59GG9_HUMAN	22.8	1	1		113115	Son of sevenless homolog 1 variant (Fragment) OS=Homo sapiens OX=9606 PE=2 SV=1
35	495837	Q53SF8|Q53SF8_HUMAN	22.8	1	1		149062	Uncharacterized protein SOS1 (Fragment) OS=Homo sapiens OX=9606 GN=SOS1 PE=4 SV=1
63	495842	G5E9C8|G5E9C8_HUMAN	21.21	1	1		150857	Son of sevenless homolog 1 OS=Homo sapiens OX=9606 GN=SOS1 PE=1 SV=1
30	496149	F5H7S7|F5H7S7_HUMAN	31.96	2	1		174448	Ras GTPase-activating-like protein IQGAP2 OS=Homo sapiens OX=9606 GN=IQGAP2 PE=1 SV=2
30	496261	A0A024RAJ8|A0A024RAJ8_HUMAN	31.96	2	1		180592	IQ motif containing GTPase activating protein 2 isoform CRA_b OS=Homo sapiens OX=9606 GN=IQGAP2 PE=4 SV=1
89	496321	A0A087X0P0|A0A087X0P0_HUMAN	23.91	1	1		312104	Centromere-associated protein E OS=Homo sapiens OX=9606 GN=CENPE PE=1 SV=1
17	494382	A0A0G2JIW1|A0A0G2JIW1_HUMAN	75.5	3	3		70109	Heat shock 70 kDa protein 1B OS=Homo sapiens OX=9606 GN=HSPA1B PE=1 SV=1
19	494396	H0YEN5|H0YEN5_HUMAN	48.85	2	2		21154	40S ribosomal protein S2 (Fragment) OS=Homo sapiens OX=9606 GN=RPS2 PE=1 SV=1
19	494397	Q8J014|Q8J014_HUMAN	48.85	2	2		25605	40S ribosomal protein S2 OS=Homo sapiens OX=9606 GN=rps2 PE=2 SV=1
10	494398	B4E1T6|B4E1T6_HUMAN	72.1	2	2		43003	cDNA FLJ54342 highly similar to Heat shock 70 kDa protein 1 OS=Homo sapiens OX=9606 PE=2 SV=1
19	494399	Q9BSW5|Q9BSW5_HUMAN	48.85	2	2		10541	RPS2 protein (Fragment) OS=Homo sapiens OX=9606 GN=RPS2 PE=2 SV=2
19	494400	E9PQD7|E9PQD7_HUMAN	48.85	2	2		25211	40S ribosomal protein S2 OS=Homo sapiens OX=9606 GN=RPS2 PE=1 SV=1
23	494401	Q0VAS5|Q0VAS5_HUMAN	93.31	4	4		11314	Histone H4 OS=Homo sapiens OX=9606 GN=HIST1H4H PE=2 SV=1
23	494402	B2R4R0|B2R4R0_HUMAN	93.31	4	4		11367	Histone H4 OS=Homo sapiens OX=9606 GN=HIST1H4J PE=2 SV=1
43	494406	A0A4D5RAI5|A0A4D5RAI5_HUMAN	55.72	1	1		28432	Annexin OS=Homo sapiens OX=9606 PE=3 SV=1
43	494407	B4DL19|B4DL19_HUMAN	55.72	1	1		19589	Annexin OS=Homo sapiens OX=9606 PE=2 SV=1
43	494408	A0A4D5RAU4|A0A4D5RAU4_HUMAN	55.72	1	1		24901	Annexin OS=Homo sapiens OX=9606 PE=3 SV=1
43	494409	A0A4D5RAG0|A0A4D5RAG0_HUMAN	55.72	1	1		30124	Annexin OS=Homo sapiens OX=9606 PE=3 SV=1
43	494410	A0A4D5RAA5|A0A4D5RAA5_HUMAN	55.72	1	1		31509	Annexin OS=Homo sapiens OX=9606 PE=3 SV=1
43	494411	A0A4D5RA86|A0A4D5RA86_HUMAN	55.72	1	1		32859	Annexin OS=Homo sapiens OX=9606 PE=3 SV=1
43	494412	A0A4D5RAB7|A0A4D5RAB7_HUMAN	55.72	1	1		33181	Annexin OS=Homo sapiens OX=9606 PE=3 SV=1
43	494413	A0A4D5RAA2|A0A4D5RAA2_HUMAN	55.72	1	1		34437	Annexin OS=Homo sapiens OX=9606 PE=3 SV=1
43	494414	Q5TZZ9|Q5TZZ9_HUMAN	55.72	1	1		38714	Annexin OS=Homo sapiens OX=9606 GN=ANXA1 PE=2 SV=1
28	494419	V9HWF5|V9HWF5_HUMAN	48.93	1	1	Carbamidomethylation	18012	Peptidyl-prolyl cis-trans isomerase OS=Homo sapiens OX=9606 GN=HEL-S-69p PE=1 SV=1
28	494420	A8K486|A8K486_HUMAN	48.93	1	1	Carbamidomethylation	18013	Peptidyl-prolyl cis-trans isomerase OS=Homo sapiens OX=9606 PE=2 SV=1
17	491868	A0A1X7SBS1|A0A1X7SBS1_HUMAN	44.24	3	2	Mutation	81795	Heterogeneous nuclear ribonucleoprotein U OS=Homo sapiens OX=9606 GN=HNRNPU PE=1 SV=1
17	491869	B3KX72|B3KX72_HUMAN	44.24	3	2	Mutation	83085	cDNA FLJ44920 fis clone BRAMY3011501 highly similar to Heterogeneous nuclear ribonucleoprotein U OS=Homo sapiens OX=9606 PE=2 SV=1
17	491870	B4DLR3|B4DLR3_HUMAN	44.24	3	2	Mutation	86861	cDNA FLJ54020 highly similar to Heterogeneous nuclear ribonucleoprotein U OS=Homo sapiens OX=9606 PE=2 SV=1
18	491914	Q96BA7|Q96BA7_HUMAN	59.25	1	1		79716	HNRPU protein OS=Homo sapiens OX=9606 PE=2 SV=1
18	491915	A0A1W2PP35|A0A1W2PP35_HUMAN	59.25	1	1		80649	Heterogeneous nuclear ribonucleoprotein U (Fragment) OS=Homo sapiens OX=9606 GN=HNRNPU PE=1 SV=1
47	491918	B7Z9U8|B7Z9U8_HUMAN	24.22	1	1		154536	cDNA FLJ78962 highly similar to Dedicator of cytokinesis protein 6 OS=Homo sapiens OX=9606 PE=2 SV=1
47	491919	B4DIL4|B4DIL4_HUMAN	24.22	1	1		154493	cDNA FLJ50166 highly similar to Dedicator of cytokinesis protein 6 OS=Homo sapiens OX=9606 PE=2 SV=1
48	491920	A0A087WWT3|A0A087WWT3_HUMAN	23.67	1	1		45148	Albumin OS=Homo sapiens OX=9606 GN=ALB PE=1 SV=1
48	491921	H0YA55|H0YA55_HUMAN	23.67	1	1		51578	Albumin (Fragment) OS=Homo sapiens OX=9606 GN=ALB PE=1 SV=1
48	491922	D6RHD5|D6RHD5_HUMAN	23.67	1	1		52059	Albumin OS=Homo sapiens OX=9606 GN=ALB PE=1 SV=1
48	491923	B7WNR0|B7WNR0_HUMAN	23.67	1	1		56212	Albumin OS=Homo sapiens OX=9606 GN=ALB PE=1 SV=1
48	491924	B2RBS8|B2RBS8_HUMAN	23.67	1	1		69393	cDNA FLJ95666 highly similar to Homo sapiens albumin (ALB) mRNA OS=Homo sapiens OX=9606 PE=2 SV=1
50	491928	G3V5W4|G3V5W4_HUMAN	22.96	1	1		10831	Tubulin beta-3 chain OS=Homo sapiens OX=9606 GN=TUBB3 PE=1 SV=1
50	491929	G3V3R4|G3V3R4_HUMAN	22.96	1	1		16432	HCG1983504 isoform CRA_c OS=Homo sapiens OX=9606 GN=TUBB3 PE=1 SV=1
52	491931	A0A024R2D7|A0A024R2D7_HUMAN	22.18	1	1		41393	ADA3 homolog OS=Homo sapiens OX=9606 GN=TADA3L PE=2 SV=1
40	491933	B7Z2I8|B7Z2I8_HUMAN	20.84	1	1		82295	PDZ domain containing RING finger 3 isoform CRA_a OS=Homo sapiens OX=9606 GN=PDZRN3 PE=2 SV=1
55	491934	A0A172Q398|A0A172Q398_HUMAN	20.41	1	1		71679	CUB domain-containing protein 1 (Fragment) OS=Homo sapiens OX=9606 GN=CDCP1 PE=2 SV=1
55	491935	A0A0Y0BS51|A0A0Y0BS51_HUMAN	20.41	1	1		71855	CUB domain containing protein 1 (Fragment) OS=Homo sapiens OX=9606 PE=2 SV=1
58	491940	G5E9G0|G5E9G0_HUMAN	21.65	1	1		40267	60S ribosomal protein L3 OS=Homo sapiens OX=9606 GN=RPL3 PE=1 SV=1
69	491957	A0A7I2V638|A0A7I2V638_HUMAN	24.69	1	1		5352	Ribosomal protein L19 OS=Homo sapiens OX=9606 GN=RPL19 PE=1 SV=1
69	491960	A0A7I2V4U6|A0A7I2V4U6_HUMAN	24.69	1	1		10938	Ribosomal protein L19 OS=Homo sapiens OX=9606 GN=RPL19 PE=1 SV=1
69	491961	A0A7I2V2L0|A0A7I2V2L0_HUMAN	24.69	1	1		12422	Ribosomal protein L19 OS=Homo sapiens OX=9606 GN=RPL19 PE=1 SV=1
69	491962	A0A7I2V512|A0A7I2V512_HUMAN	24.69	1	1		12536	Ribosomal protein L19 OS=Homo sapiens OX=9606 GN=RPL19 PE=1 SV=1
69	491967	J3QR09|J3QR09_HUMAN	24.69	1	1		23135	Ribosomal protein L19 OS=Homo sapiens OX=9606 GN=RPL19 PE=1 SV=1
69	491968	J3KTE4|J3KTE4_HUMAN	24.69	1	1		23248	Ribosomal protein L19 OS=Homo sapiens OX=9606 GN=RPL19 PE=1 SV=1
69	491969	Q53G49|Q53G49_HUMAN	24.69	1	1		23467	Ribosomal protein L19 (Fragment) OS=Homo sapiens OX=9606 PE=2 SV=1
69	491971	A0A7I2YQG2|A0A7I2YQG2_HUMAN	24.69	1	1		25701	Ribosomal protein L19 OS=Homo sapiens OX=9606 GN=RPL19 PE=1 SV=1
28	492089	G3V5H6|G3V5H6_HUMAN	22.57	1	1		5634	Spermatogenesis-associated protein 7 OS=Homo sapiens OX=9606 GN=SPATA7 PE=1 SV=1
28	492092	G3V287|G3V287_HUMAN	22.57	1	1		9193	Spermatogenesis-associated protein 7 OS=Homo sapiens OX=9606 GN=SPATA7 PE=1 SV=1
28	492101	B3KP74|B3KP74_HUMAN	22.57	1	1		36414	cDNA FLJ31302 fis clone LIVER1000079 highly similar to Spermatogenesis-associated protein 7 OS=Homo sapiens OX=9606 PE=2 SV=1
60	492148	sp|Q96DE9|EOLA2_HUMAN	20.81	1	1		17780	Protein EOLA2 OS=Homo sapiens OX=9606 GN=EOLA2 PE=2 SV=1
35	492176	sp|P49753|ACOT2_HUMAN	22.8	1	1		53219	Acyl-coenzyme A thioesterase 2 mitochondrial OS=Homo sapiens OX=9606 GN=ACOT2 PE=1 SV=6
35	492381	Q96HC2|Q96HC2_HUMAN	22.8	1	1		96734	ABCA2 protein (Fragment) OS=Homo sapiens OX=9606 GN=ABCA2 PE=2 SV=1
57	492643	Q8N519|Q8N519_HUMAN	37.46	1	1		53197	LMNA protein OS=Homo sapiens OX=9606 PE=2 SV=1
57	492644	Q5I6Y5|Q5I6Y5_HUMAN	37.46	1	1		55044	Epididymis secretory sperm binding protein OS=Homo sapiens OX=9606 GN=LMNA PE=2 SV=1
26	492645	Q3BDU5|Q3BDU5_HUMAN	56.6	3	3		55638	Prelamin-A/C OS=Homo sapiens OX=9606 GN=LMNA PE=1 SV=1
57	492646	A0A6Q8PHQ9|A0A6Q8PHQ9_HUMAN	37.46	1	1		58496	Prelamin-A/C OS=Homo sapiens OX=9606 GN=LMNA PE=1 SV=1
26	492647	A0A384MQX1|A0A384MQX1_HUMAN	56.6	3	3		74140	Epididymis secretory sperm binding protein OS=Homo sapiens OX=9606 PE=2 SV=1
26	492648	A0A6Q8PFJ0|A0A6Q8PFJ0_HUMAN	56.6	3	3		80903	Prelamin-A/C OS=Homo sapiens OX=9606 GN=LMNA PE=1 SV=1
29	492850	E9PG32|E9PG32_HUMAN	23.31	1	1	Oxidation (M)	454330	Dynein heavy chain 12 axonemal OS=Homo sapiens OX=9606 GN=DNAH12 PE=1 SV=2
40	493127	A0A024R1N1|A0A024R1N1_HUMAN	34.35	2	2		226530	Myosin heavy polypeptide 9 non-muscle isoform CRA_a OS=Homo sapiens OX=9606 GN=MYH9 PE=3 SV=1
43	493626	B1AK87|B1AK87_HUMAN	23.79	1	1	Carbamidomethylation; Mutation	27440	F-actin-capping protein subunit beta OS=Homo sapiens OX=9606 GN=CAPZB PE=1 SV=2
43	493627	B1AK85|B1AK85_HUMAN	23.79	1	1	Carbamidomethylation; Mutation	29265	F-actin-capping protein subunit beta OS=Homo sapiens OX=9606 GN=CAPZB PE=1 SV=1
43	493628	A0A384MR50|A0A384MR50_HUMAN	23.79	1	1	Carbamidomethylation; Mutation	30629	F-actin-capping protein subunit beta OS=Homo sapiens OX=9606 PE=2 SV=1
43	493629	B2R7T8|B2R7T8_HUMAN	23.79	1	1	Carbamidomethylation; Mutation	30657	F-actin-capping protein subunit beta OS=Homo sapiens OX=9606 PE=2 SV=1
43	493630	B1AK88|B1AK88_HUMAN	23.79	1	1	Carbamidomethylation; Mutation	33781	F-actin-capping protein subunit beta OS=Homo sapiens OX=9606 GN=CAPZB PE=1 SV=1
43	493631	B4DWA6|B4DWA6_HUMAN	23.79	1	1	Carbamidomethylation; Mutation	37482	F-actin-capping protein subunit beta OS=Homo sapiens OX=9606 PE=2 SV=1
10	494378	B4DNT8|B4DNT8_HUMAN	72.1	2	2		67419	cDNA FLJ54370 highly similar to Heat shock 70 kDa protein 1 OS=Homo sapiens OX=9606 PE=2 SV=1
17	494380	A0A1U9X7W4|A0A1U9X7W4_HUMAN	75.5	3	3		70038	HSPA1A OS=Homo sapiens OX=9606 PE=3 SV=1
2	491794	B4E0B3|B4E0B3_HUMAN	94.32	3	2		12121	Histone H2A OS=Homo sapiens OX=9606 PE=2 SV=1
14	491795	D9YZU5|D9YZU5_HUMAN	67.48	2	2		15998	Beta-globin OS=Homo sapiens OX=9606 GN=HBB PE=3 SV=1
14	491796	C8C504|C8C504_HUMAN	67.48	2	2		15997	Beta-globin OS=Homo sapiens OX=9606 GN=HBB PE=3 SV=1
14	491797	A0A481SHK9|A0A481SHK9_HUMAN	67.48	2	2		15968	Hemoglobin subunit beta OS=Homo sapiens OX=9606 GN=HBB PE=3 SV=1
22	491798	A0A2R8YGF8|A0A2R8YGF8_HUMAN	55.66	2	2		18089	Actin cytoplasmic 1 (Fragment) OS=Homo sapiens OX=9606 GN=ACTB PE=1 SV=1
14	491799	Q9H1I6|Q9H1I6_HUMAN	57.72	1	1		3294	Mutant beta-globin (Fragment) OS=Homo sapiens OX=9606 GN=HBB PE=3 SV=1
14	491800	B3VL12|B3VL12_HUMAN	57.72	1	1		4266	Truncated beta globin OS=Homo sapiens OX=9606 PE=3 SV=1
14	491801	D5FZW3|D5FZW3_HUMAN	57.72	1	1		4550	Beta globin (Fragment) OS=Homo sapiens OX=9606 PE=3 SV=1
14	491802	A0A2S1CVU8|A0A2S1CVU8_HUMAN	57.72	1	1		6034	Beta-globin (Fragment) OS=Homo sapiens OX=9606 GN=HBB PE=3 SV=1
14	491803	E9M263|E9M263_HUMAN	57.72	1	1		6252	Hemoglobin beta chain (Fragment) OS=Homo sapiens OX=9606 GN=HBB PE=3 SV=1
14	491804	O95408|O95408_HUMAN	57.72	1	1		6266	Beta globin (Fragment) OS=Homo sapiens OX=9606 GN=HBB PE=3 SV=1
14	491805	Q9BXA2|Q9BXA2_HUMAN	57.72	1	1		6463	Beta-globin (Fragment) OS=Homo sapiens OX=9606 PE=3 SV=1
14	491806	A0A140KFU0|A0A140KFU0_HUMAN	57.72	1	1		6939	Beta globin (Fragment) OS=Homo sapiens OX=9606 GN=hbb PE=3 SV=1
14	491807	A9YUX2|A9YUX2_HUMAN	57.72	1	1		6998	Truncated beta-globin OS=Homo sapiens OX=9606 GN=HBB PE=3 SV=1
14	491808	Q9UP81|Q9UP81_HUMAN	57.72	1	1		9689	Mutant beta-globin OS=Homo sapiens OX=9606 GN=HBB PE=3 SV=1
14	491809	F8W6P5|F8W6P5_HUMAN	57.72	1	1		9670	Hemoglobin subunit beta (Fragment) OS=Homo sapiens OX=9606 GN=HBB PE=1 SV=1
14	491810	Q3Y9I8|Q3Y9I8_HUMAN	57.72	1	1		10962	Hemoglobin beta (Fragment) OS=Homo sapiens OX=9606 GN=HBB PE=3 SV=1
14	491811	A0A1B4WRL5|A0A1B4WRL5_HUMAN	57.72	1	1		11532	Beta globin (Fragment) OS=Homo sapiens OX=9606 GN=hbb PE=3 SV=1
14	491812	Q8IZI0|Q8IZI0_HUMAN	57.72	1	1		11505	Hemoglobin beta chain variant Hb-I_Toulouse (Fragment) OS=Homo sapiens OX=9606 GN=HBB PE=3 SV=1
14	491813	B3VL31|B3VL31_HUMAN	57.72	1	1		11508	Beta globin (Fragment) OS=Homo sapiens OX=9606 PE=3 SV=1
14	491814	Q52MT0|Q52MT0_HUMAN	57.72	1	1		11476	Beta globin (Fragment) OS=Homo sapiens OX=9606 GN=HBB PE=3 SV=1
14	491815	B3VL05|B3VL05_HUMAN	57.72	1	1		11494	Beta globin (Fragment) OS=Homo sapiens OX=9606 PE=3 SV=1
14	491816	Q3LR79|Q3LR79_HUMAN	57.72	1	1		11482	Hemoglobin beta (Fragment) OS=Homo sapiens OX=9606 GN=HBB PE=3 SV=1
14	491817	Q9BWU5|Q9BWU5_HUMAN	57.72	1	1		11501	Mutant hemoglobin beta chain (Fragment) OS=Homo sapiens OX=9606 GN=HBB PE=3 SV=1
14	491818	Q8IUL9|Q8IUL9_HUMAN	57.72	1	1		11548	Hemoglobin beta chain variant Hb.Sinai-Bel Air (Fragment) OS=Homo sapiens OX=9606 GN=HBB PE=3 SV=1
14	491819	E9NGZ5|E9NGZ5_HUMAN	57.72	1	1		11494	Hemoglobin beta globin chain (Fragment) OS=Homo sapiens OX=9606 GN=HBB PE=3 SV=1
14	491820	Q4TWB7|Q4TWB7_HUMAN	57.72	1	1		11495	Beta globin chain (Fragment) OS=Homo sapiens OX=9606 GN=HBB PE=3 SV=1
14	491821	A0A2R8Y7R2|A0A2R8Y7R2_HUMAN	57.72	1	1		12176	Hemoglobin subunit beta OS=Homo sapiens OX=9606 GN=HBB PE=1 SV=1
14	491822	Q9BWV6|Q9BWV6_HUMAN	57.72	1	1		12234	Mutant beta globin OS=Homo sapiens OX=9606 GN=HBB PE=3 SV=1
14	491823	Q9GZL9|Q9GZL9_HUMAN	57.72	1	1		12528	Beta-globin (Fragment) OS=Homo sapiens OX=9606 GN=HBB PE=3 SV=1
14	491824	B3VL86|B3VL86_HUMAN	57.72	1	1		14956	Mutant beta-globin OS=Homo sapiens OX=9606 GN=HBB PE=3 SV=1
16	491825	B3KTT5|B3KTT5_HUMAN	60.35	2	2		51917	cDNA FLJ38698 fis clone KIDNE2002015 highly similar to HEAT SHOCK 70 kDa PROTEIN 1 OS=Homo sapiens OX=9606 PE=2 SV=1
32	491826	A0A024R5Z7|A0A024R5Z7_HUMAN	33.5	1	1	Carbamidomethylation	38604	Annexin OS=Homo sapiens OX=9606 GN=ANXA2 PE=2 SV=1
33	491829	A8K1D2|A8K1D2_HUMAN	32.7	1	1	Oxidation (M)	29645	LIM and SH3 domain protein 1 OS=Homo sapiens OX=9606 PE=2 SV=1
33	491830	A0A024R1S8|A0A024R1S8_HUMAN	32.7	1	1	Oxidation (M)	29717	LIM and SH3 domain protein 1 OS=Homo sapiens OX=9606 GN=LASP1 PE=4 SV=1
46	491833	Q6IPX5|Q6IPX5_HUMAN	29.57	1	1		31296	40S ribosomal protein S2 OS=Homo sapiens OX=9606 GN=RPS2 PE=2 SV=1
46	491834	Q3KQT6|Q3KQT6_HUMAN	29.57	1	1		31385	40S ribosomal protein S2 OS=Homo sapiens OX=9606 GN=RPS2 PE=2 SV=1
23	491838	G3V5X4|G3V5X4_HUMAN	29.88	2	2		787736	Nesprin-2 OS=Homo sapiens OX=9606 GN=SYNE2 PE=1 SV=1
128	491849	F8WEM5|F8WEM5_HUMAN	25.99	2	2		7246	E3 ubiquitin-protein ligase Hakai OS=Homo sapiens OX=9606 GN=CBLL1 PE=1 SV=1
27	428018	tr|A0A0G2JPF8|A0A0G2JPF8_HUMAN	42.7	2	1		32057	Heterogeneous nuclear ribonucleoprotein C-like 4 OS=Homo sapiens OX=9606 GN=HNRNPCL4 PE=4 SV=1
39	428019	sp|B2RXH8|HNRC2_HUMAN	32.21	1	1	Mutation	32072	Heterogeneous nuclear ribonucleoprotein C-like 2 OS=Homo sapiens OX=9606 GN=HNRNPCL2 PE=1 SV=1
29	428020	sp|P0DMR1|HNRC4_HUMAN	41.62	2	2		32029	Heterogeneous nuclear ribonucleoprotein C-like 4 OS=Homo sapiens OX=9606 GN=HNRNPCL4 PE=3 SV=1
39	428021	sp|O60812|HNRC1_HUMAN	32.21	1	1	Mutation	32142	Heterogeneous nuclear ribonucleoprotein C-like 1 OS=Homo sapiens OX=9606 GN=HNRNPCL1 PE=1 SV=1
81	428296	sp|P35579|MYH9_HUMAN	31.35	2	1		226530	Myosin-9 OS=Homo sapiens OX=9606 GN=MYH9 PE=1 SV=4
59	428338	tr|A0A087WXD2|A0A087WXD2_HUMAN	21.2	1	1		106898	Membrane-associated guanylate kinase WW and PDZ domain-containing protein 1 OS=Homo sapiens OX=9606 GN=MAGI1 PE=1 SV=1
116	428355	sp|Q02224|CENPE_HUMAN	23.53	1	1		316414	Centromere-associated protein E OS=Homo sapiens OX=9606 GN=CENPE PE=1 SV=2
101	428825	sp|P36578|RL4_HUMAN	33.8	1	1		47697	60S ribosomal protein L4 OS=Homo sapiens OX=9606 GN=RPL4 PE=1 SV=5
55	428939	sp|Q9H254|SPTN4_HUMAN	26.9	1	1	Oxidation (M)	288984	Spectrin beta chain non-erythrocytic 4 OS=Homo sapiens OX=9606 GN=SPTBN4 PE=1 SV=2
44	432945	tr|H0YDU4|H0YDU4_HUMAN	27.06	1	1		27757	Nucleolar protein 56 (Fragment) OS=Homo sapiens OX=9606 GN=NOP56 PE=1 SV=1
44	432946	sp|O00567|NOP56_HUMAN	27.06	1	1		66050	Nucleolar protein 56 OS=Homo sapiens OX=9606 GN=NOP56 PE=1 SV=4
190	433117	sp|Q9Y2H9|MAST1_HUMAN	30.85	3	1		170676	Microtubule-associated serine/threonine-protein kinase 1 OS=Homo sapiens OX=9606 GN=MAST1 PE=1 SV=2
38	433199	sp|P31639|SC5A2_HUMAN	20.26	1	1		72897	Sodium/glucose cotransporter 2 OS=Homo sapiens OX=9606 GN=SLC5A2 PE=1 SV=1
53	433300	sp|Q9NRP7|STK36_HUMAN	22.75	1	1		143995	Serine/threonine-protein kinase 36 OS=Homo sapiens OX=9606 GN=STK36 PE=1 SV=2
111	433310	tr|A0A087WUX4|A0A087WUX4_HUMAN	23.12	1	1		27077	Voltage-dependent L-type calcium channel subunit alpha-1C (Fragment) OS=Homo sapiens OX=9606 GN=CACNA1C PE=1 SV=1
137	433394	tr|A0A2R8Y430|A0A2R8Y430_HUMAN	24.21	1	1		49977	Glutathione synthetase OS=Homo sapiens OX=9606 GN=GSS PE=1 SV=1
364	433677	sp|A1L4H1|SRCRL_HUMAN	27.76	2	1		165742	Soluble scavenger receptor cysteine-rich domain-containing protein SSC5D OS=Homo sapiens OX=9606 GN=SSC5D PE=1 SV=3
71	433692	sp|O60486|PLXC1_HUMAN	21.37	1	1		175741	Plexin-C1 OS=Homo sapiens OX=9606 GN=PLXNC1 PE=1 SV=1
92	433696	sp|Q96PX9|PKH4B_HUMAN	27.85	2	2		139667	Pleckstrin homology domain-containing family G member 4B OS=Homo sapiens OX=9606 GN=PLEKHG4B PE=1 SV=4
131	433786	sp|Q5T1H1|EYS_HUMAN	28.14	2	1		350797	Protein eyes shut homolog OS=Homo sapiens OX=9606 GN=EYS PE=1 SV=5
52	434118	sp|P08238|HS90B_HUMAN	30.25	2	1		83264	Heat shock protein HSP 90-beta OS=Homo sapiens OX=9606 GN=HSP90AB1 PE=1 SV=4
71	434225	sp|Q96RL7|VP13A_HUMAN	24.55	2	2		360277	Vacuolar protein sorting-associated protein 13A OS=Homo sapiens OX=9606 GN=VPS13A PE=1 SV=2
42	438671	sp|P15880|RS2_HUMAN	33.08	1	1		31324	40S ribosomal protein S2 OS=Homo sapiens OX=9606 GN=RPS2 PE=1 SV=2
17	438679	tr|A0A1X7SBS1|A0A1X7SBS1_HUMAN	49.68	3	2	Mutation	81795	Heterogeneous nuclear ribonucleoprotein U OS=Homo sapiens OX=9606 GN=HNRNPU PE=1 SV=1
28	438680	sp|Q14847|LASP1_HUMAN	29.72	1	1		29717	LIM and SH3 domain protein 1 OS=Homo sapiens OX=9606 GN=LASP1 PE=1 SV=2
17	438681	sp|Q00839|HNRPU_HUMAN	49.68	3	2	Mutation	90585	Heterogeneous nuclear ribonucleoprotein U OS=Homo sapiens OX=9606 GN=HNRNPU PE=1 SV=6
29	438683	tr|A0A087WZF2|A0A087WZF2_HUMAN	26.08	1	1		22157	Empty spiracles homolog 1 (Drosophila) isoform CRA_a OS=Homo sapiens OX=9606 GN=EMX1 PE=4 SV=1
135	438689	tr|F8WEM5|F8WEM5_HUMAN	24.77	2	2		7246	E3 ubiquitin-protein ligase Hakai OS=Homo sapiens OX=9606 GN=CBLL1 PE=1 SV=1
55	438702	sp|Q9H5V8|CDCP1_HUMAN	20.41	1	1		92932	CUB domain-containing protein 1 OS=Homo sapiens OX=9606 GN=CDCP1 PE=1 SV=3
54	438715	sp|O95235|KI20A_HUMAN	20.74	1	1		100278	Kinesin-like protein KIF20A OS=Homo sapiens OX=9606 GN=KIF20A PE=1 SV=1
50	438731	tr|A0A2R8Y7G1|A0A2R8Y7G1_HUMAN	23.29	1	1		94452	Aryl hydrocarbon receptor OS=Homo sapiens OX=9606 GN=AHR PE=1 SV=1
58	438762	sp|Q9ULU8|CAPS1_HUMAN	21.39	1	1		152786	Calcium-dependent secretion activator 1 OS=Homo sapiens OX=9606 GN=CADPS PE=1 SV=3
61	438769	sp|P84098|RL19_HUMAN	21.07	1	1		23466	60S ribosomal protein L19 OS=Homo sapiens OX=9606 GN=RPL19 PE=1 SV=1
64	438782	sp|Q9UL36|ZN236_HUMAN	20.15	1	1		203702	Zinc finger protein 236 OS=Homo sapiens OX=9606 GN=ZNF236 PE=2 SV=2
35	438787	sp|P39023|RL3_HUMAN	50.06	2	2		46109	60S ribosomal protein L3 OS=Homo sapiens OX=9606 GN=RPL3 PE=1 SV=2
19	438907	sp|Q9P212|PLCE1_HUMAN	44.61	2	2		258712	1-phosphatidylinositol 4 5-bisphosphate phosphodiesterase epsilon-1 OS=Homo sapiens OX=9606 GN=PLCE1 PE=1 SV=3
66	439215	sp|O43603|GALR2_HUMAN	20.86	1	1		41700	Galanin receptor type 2 OS=Homo sapiens OX=9606 GN=GALR2 PE=1 SV=1
52	439236	sp|Q8WZ74|CTTB2_HUMAN	21.38	1	1		181050	Cortactin-binding protein 2 OS=Homo sapiens OX=9606 GN=CTTNBP2 PE=1 SV=1
52	439281	sp|Q92817|EVPL_HUMAN	29.75	2	1		231602	Envoplakin OS=Homo sapiens OX=9606 GN=EVPL PE=1 SV=3
127	439327	sp|Q9Y2W1|TR150_HUMAN	20.42	1	1		108666	Thyroid hormone receptor-associated protein 3 OS=Homo sapiens OX=9606 GN=THRAP3 PE=1 SV=2
259	439729	tr|A0A0G2JR66|A0A0G2JR66_HUMAN	26.33	2	1		208705	Kinesin-like protein KIF26B (Fragment) OS=Homo sapiens OX=9606 GN=KIF26B PE=1 SV=1
37	440047	tr|K7ENG9|K7ENG9_HUMAN	22.02	1	1	Mutation	12098	Synaptogyrin-2 OS=Homo sapiens OX=9606 GN=SYNGR2 PE=1 SV=1
39	440119	tr|A0A0G2JNQ3|A0A0G2JNQ3_HUMAN	32.21	1	1	Mutation	32053	Heterogeneous nuclear ribonucleoprotein C-like 2 OS=Homo sapiens OX=9606 GN=HNRNPCL2 PE=4 SV=1
74	440131	sp|Q14134|TRI29_HUMAN	28.78	1	1		65835	Tripartite motif-containing protein 29 OS=Homo sapiens OX=9606 GN=TRIM29 PE=1 SV=2
82	440138	sp|P68104|EF1A1_HUMAN	33.57	1	1		50141	Elongation factor 1-alpha 1 OS=Homo sapiens OX=9606 GN=EEF1A1 PE=1 SV=1
65	441229	sp|P0DJD0|RGPD1_HUMAN	23.96	1	1		196661	RANBP2-like and GRIP domain-containing protein 1 OS=Homo sapiens OX=9606 GN=RGPD1 PE=2 SV=1
65	441230	sp|P0DJD1|RGPD2_HUMAN	23.96	1	1		197306	RANBP2-like and GRIP domain-containing protein 2 OS=Homo sapiens OX=9606 GN=RGPD2 PE=2 SV=1
65	441231	sp|Q7Z3J3|RGPD4_HUMAN	23.96	1	1		197287	RanBP2-like and GRIP domain-containing protein 4 OS=Homo sapiens OX=9606 GN=RGPD4 PE=2 SV=3
17	446365	sp|P0DMV8|HS71A_HUMAN	75.5	3	3		70052	Heat shock 70 kDa protein 1A OS=Homo sapiens OX=9606 GN=HSPA1A PE=1 SV=1
52	446373	sp|P04083|ANXA1_HUMAN	55.53	1	1		38714	Annexin A1 OS=Homo sapiens OX=9606 GN=ANXA1 PE=1 SV=2
16	446374	tr|A0A087WWU8|A0A087WWU8_HUMAN	52.01	1	1	Oxidation (M)	26421	Tropomyosin alpha-3 chain OS=Homo sapiens OX=9606 GN=TPM3 PE=1 SV=1
56	446376	sp|P06576|ATPB_HUMAN	45.72	1	1	Oxidation (M)	56560	ATP synthase subunit beta mitochondrial OS=Homo sapiens OX=9606 GN=ATP5F1B PE=1 SV=3
17	446378	sp|P63104|1433Z_HUMAN	38.91	1	1		27745	14-3-3 protein zeta/delta OS=Homo sapiens OX=9606 GN=YWHAZ PE=1 SV=1
57	446379	sp|P38919|IF4A3_HUMAN	37.49	1	1		46871	Eukaryotic initiation factor 4A-III OS=Homo sapiens OX=9606 GN=EIF4A3 PE=1 SV=4
96	446380	sp|P14174|MIF_HUMAN	54.51	1	1		12476	Macrophage migration inhibitory factor OS=Homo sapiens OX=9606 GN=MIF PE=1 SV=4
18	446383	sp|P08195|4F2_HUMAN	51.96	2	1		67994	4F2 cell-surface antigen heavy chain OS=Homo sapiens OX=9606 GN=SLC3A2 PE=1 SV=3
87	446385	sp|Q3MIW9|MUCL3_HUMAN	24.61	1	1		56347	Mucin-like protein 3 OS=Homo sapiens OX=9606 GN=MUCL3 PE=1 SV=2
59	446387	tr|H0Y3Z3|H0Y3Z3_HUMAN	32.05	1	1		31552	Protein disulfide-isomerase (Fragment) OS=Homo sapiens OX=9606 GN=P4HB PE=1 SV=1
31	446388	sp|P22626|ROA2_HUMAN	53	2	2		37430	Heterogeneous nuclear ribonucleoproteins A2/B1 OS=Homo sapiens OX=9606 GN=HNRNPA2B1 PE=1 SV=2
87	446391	sp|Q9Y6X8|ZHX2_HUMAN	33.95	2	1		92307	Zinc fingers and homeoboxes protein 2 OS=Homo sapiens OX=9606 GN=ZHX2 PE=1 SV=1
114	446392	sp|P13639|EF2_HUMAN	23.37	1	1		95338	Elongation factor 2 OS=Homo sapiens OX=9606 GN=EEF2 PE=1 SV=4
64	446394	sp|P38159|RBMX_HUMAN	28.52	1	1		42332	RNA-binding motif protein X chromosome OS=Homo sapiens OX=9606 GN=RBMX PE=1 SV=3
65	446395	tr|A0A2R8YEU4|A0A2R8YEU4_HUMAN	28.35	1	1	Oxidation (M)	19865	Tropomyosin alpha-4 chain (Fragment) OS=Homo sapiens OX=9606 GN=TPM4 PE=1 SV=1
65	446396	tr|A0A2R8YGX3|A0A2R8YGX3_HUMAN	28.35	1	1	Oxidation (M)	20986	Tropomyosin alpha-4 chain OS=Homo sapiens OX=9606 GN=TPM4 PE=1 SV=1
65	446397	tr|A0A2R8YH90|A0A2R8YH90_HUMAN	28.35	1	1	Oxidation (M)	25533	Tropomyosin alpha-4 chain (Fragment) OS=Homo sapiens OX=9606 GN=TPM4 PE=1 SV=1
65	446398	tr|A0A2R8YE05|A0A2R8YE05_HUMAN	28.35	1	1	Oxidation (M)	26034	Tropomyosin alpha-4 chain OS=Homo sapiens OX=9606 GN=TPM4 PE=1 SV=1
65	446399	tr|K7ENT6|K7ENT6_HUMAN	28.35	1	1	Oxidation (M)	28116	Tropomyosin alpha-4 chain OS=Homo sapiens OX=9606 GN=TPM4 PE=1 SV=3
65	446400	tr|A0A2R8YHD2|A0A2R8YHD2_HUMAN	28.35	1	1	Oxidation (M)	28705	Tropomyosin alpha-4 chain (Fragment) OS=Homo sapiens OX=9606 GN=TPM4 PE=1 SV=2
66	446401	sp|P00558|PGK1_HUMAN	28.36	1	1	Oxidation (M)	44615	Phosphoglycerate kinase 1 OS=Homo sapiens OX=9606 GN=PGK1 PE=1 SV=3
66	446402	sp|P07205|PGK2_HUMAN	28.36	1	1	Oxidation (M)	44796	Phosphoglycerate kinase 2 OS=Homo sapiens OX=9606 GN=PGK2 PE=1 SV=3
67	446409	tr|E5RHH1|E5RHH1_HUMAN	26.63	1	1		4528	60S ribosomal protein L26-like 1 (Fragment) OS=Homo sapiens OX=9606 GN=RPL26L1 PE=1 SV=8
67	446410	tr|E5RIT6|E5RIT6_HUMAN	26.63	1	1		15207	60S ribosomal protein L26-like 1 (Fragment) OS=Homo sapiens OX=9606 GN=RPL26L1 PE=1 SV=1
67	446411	sp|Q9UNX3|RL26L_HUMAN	26.63	1	1		17256	60S ribosomal protein L26-like 1 OS=Homo sapiens OX=9606 GN=RPL26L1 PE=1 SV=1
67	446412	sp|P61254|RL26_HUMAN	26.63	1	1		17258	60S ribosomal protein L26 OS=Homo sapiens OX=9606 GN=RPL26 PE=1 SV=1
44	446415	sp|P25106|ACKR3_HUMAN	27.06	1	1		41493	Atypical chemokine receptor 3 OS=Homo sapiens OX=9606 GN=ACKR3 PE=1 SV=3
68	446417	sp|P61247|RS3A_HUMAN	25.45	1	1	Oxidation (M)	29945	40S ribosomal protein S3a OS=Homo sapiens OX=9606 GN=RPS3A PE=1 SV=2
69	446421	sp|Q9NZM6|PK2L2_HUMAN	25.68	1	1		73790	Polycystic kidney disease 2-like 2 protein OS=Homo sapiens OX=9606 GN=PKD2L2 PE=2 SV=2
70	446424	tr|F8VZA3|F8VZA3_HUMAN	25.34	1	1		11571	60S ribosomal protein L6 (Fragment) OS=Homo sapiens OX=9606 GN=RPL6 PE=1 SV=1
70	446425	tr|F8VWR1|F8VWR1_HUMAN	25.34	1	1		13204	60S ribosomal protein L6 (Fragment) OS=Homo sapiens OX=9606 GN=RPL6 PE=1 SV=2
70	446426	tr|F8VU16|F8VU16_HUMAN	25.34	1	1		13448	60S ribosomal protein L6 (Fragment) OS=Homo sapiens OX=9606 GN=RPL6 PE=1 SV=1
70	446428	tr|U3KQR5|U3KQR5_HUMAN	25.34	1	1		17928	60S ribosomal protein L6 (Fragment) OS=Homo sapiens OX=9606 GN=RPL6 PE=1 SV=1
70	446430	sp|Q02878|RL6_HUMAN	25.34	1	1		32728	60S ribosomal protein L6 OS=Homo sapiens OX=9606 GN=RPL6 PE=1 SV=3
45	446432	tr|B4DND0|B4DND0_HUMAN	22.12	1	1		18751	Uridine phosphorylase 1 OS=Homo sapiens OX=9606 GN=UPP1 PE=1 SV=1
44	446433	sp|Q96JK4|HIPL1_HUMAN	27.06	1	1		86731	HHIP-like protein 1 OS=Homo sapiens OX=9606 GN=HHIPL1 PE=2 SV=2
71	446435	tr|A0A087WV04|A0A087WV04_HUMAN	25.99	1	1		77422	SUN domain-containing ossification factor OS=Homo sapiens OX=9606 GN=SUCO PE=1 SV=1
71	446438	tr|B4DYM4|B4DYM4_HUMAN	25.99	1	1		98284	SUN domain-containing ossification factor OS=Homo sapiens OX=9606 GN=SUCO PE=1 SV=1
35	446446	tr|K7EN13|K7EN13_HUMAN	24.8	1	1		19318	Ubiquitin carboxyl-terminal hydrolase 32 (Fragment) OS=Homo sapiens OX=9606 GN=USP32 PE=1 SV=1
72	446452	sp|O75962|TRIO_HUMAN	24.76	1	1		346901	Triple functional domain protein OS=Homo sapiens OX=9606 GN=TRIO PE=1 SV=2
86	446455	tr|A0A0A0MRG9|A0A0A0MRG9_HUMAN	21.9	1	1		189633	CDK5 regulatory subunit-associated protein 2 OS=Homo sapiens OX=9606 GN=CDK5RAP2 PE=1 SV=1
71	446457	sp|Q9UBS9|SUCO_HUMAN	25.99	1	1		139430	SUN domain-containing ossification factor OS=Homo sapiens OX=9606 GN=SUCO PE=1 SV=1
44	446467	sp|A6NMZ7|CO6A6_HUMAN	27.06	1	1		247171	Collagen alpha-6(VI) chain OS=Homo sapiens OX=9606 GN=COL6A6 PE=1 SV=2
32	446475	tr|H7C1J2|H7C1J2_HUMAN	23.41	1	1		26471	Deoxynucleotidyltransferase terminal-interacting protein 1 (Fragment) OS=Homo sapiens OX=9606 GN=DNTTIP1 PE=1 SV=1
32	446479	sp|Q9H147|TDIF1_HUMAN	23.41	1	1		37013	Deoxynucleotidyltransferase terminal-interacting protein 1 OS=Homo sapiens OX=9606 GN=DNTTIP1 PE=1 SV=2
76	446484	tr|A0A0C4DG22|A0A0C4DG22_HUMAN	21.83	1	1		20397	RNA exonuclease 4 (Fragment) OS=Homo sapiens OX=9606 GN=REXO4 PE=1 SV=1
47	446488	tr|A0A087X055|A0A087X055_HUMAN	21.22	1	1		79687	Ras-responsive element-binding protein 1 OS=Homo sapiens OX=9606 GN=RREB1 PE=1 SV=1
82	446496	tr|A0A2R8Y870|A0A2R8Y870_HUMAN	20.46	1	1		80250	Kinesin-like protein (Fragment) OS=Homo sapiens OX=9606 GN=KIFC2 PE=1 SV=1
86	446507	sp|Q86V15|CASZ1_HUMAN	20.12	1	1		190068	Zinc finger protein castor homolog 1 OS=Homo sapiens OX=9606 GN=CASZ1 PE=1 SV=4
80	446517	sp|Q8IZD4|DCP1B_HUMAN	21.32	1	1		67723	mRNA-decapping enzyme 1B OS=Homo sapiens OX=9606 GN=DCP1B PE=1 SV=2
195	446538	sp|P46939|UTRO_HUMAN	23.2	2	2		394467	Utrophin OS=Homo sapiens OX=9606 GN=UTRN PE=1 SV=2
85	446540	tr|A0A494C0W7|A0A494C0W7_HUMAN	21.06	1	1		51822	Cytochrome P450 3A4 OS=Homo sapiens OX=9606 GN=CYP3A4 PE=1 SV=1
45	446541	sp|P46779|RL28_HUMAN	38.73	2	1		15747	60S ribosomal protein L28 OS=Homo sapiens OX=9606 GN=RPL28 PE=1 SV=3
35	446551	sp|Q9P2E9|RRBP1_HUMAN	30.98	2	1		152456	Ribosome-binding protein 1 OS=Homo sapiens OX=9606 GN=RRBP1 PE=1 SV=5
29	446573	sp|B7ZW38|HNRC3_HUMAN	41.62	2	2		32029	Heterogeneous nuclear ribonucleoprotein C-like 3 OS=Homo sapiens OX=9606 GN=HNRNPCL3 PE=2 SV=1
210	446587	tr|A0A2R8Y5N1|A0A2R8Y5N1_HUMAN	27.43	2	2		139413	Protein diaphanous homolog 1 OS=Homo sapiens OX=9606 GN=DIAPH1 PE=1 SV=1
39	446591	sp|Q9H0H0|INT2_HUMAN	23.35	1	1		134323	Integrator complex subunit 2 OS=Homo sapiens OX=9606 GN=INTS2 PE=1 SV=2
63	447714	sp|Q07889|SOS1_HUMAN	21.21	1	1		152463	Son of sevenless homolog 1 OS=Homo sapiens OX=9606 GN=SOS1 PE=1 SV=1
53	447901	sp|Q6P1J6|PLB1_HUMAN	20.5	1	1		163080	Phospholipase B1 membrane-associated OS=Homo sapiens OX=9606 GN=PLB1 PE=1 SV=3
65	447987	sp|Q99666|RGPD5_HUMAN	23.96	1	1		198922	RANBP2-like and GRIP domain-containing protein 5/6 OS=Homo sapiens OX=9606 GN=RGPD5 PE=1 SV=3
13	458601	tr|E7ESH4|E7ESH4_HUMAN	105.94	5	5		25226	60 kDa heat shock protein mitochondrial (Fragment) OS=Homo sapiens OX=9606 GN=HSPD1 PE=1 SV=1
12	458602	sp|P10809|CH60_HUMAN	107.22	5	5		61055	60 kDa heat shock protein mitochondrial OS=Homo sapiens OX=9606 GN=HSPD1 PE=1 SV=2
13	458603	tr|C9JL19|C9JL19_HUMAN	102.42	4	4		8991	60 kDa heat shock protein mitochondrial (Fragment) OS=Homo sapiens OX=9606 GN=HSPD1 PE=1 SV=1
13	458604	tr|C9JCQ4|C9JCQ4_HUMAN	102.42	4	4		10279	60 kDa heat shock protein mitochondrial (Fragment) OS=Homo sapiens OX=9606 GN=HSPD1 PE=1 SV=1
13	458605	tr|C9JL25|C9JL25_HUMAN	102.42	4	4		19207	60 kDa heat shock protein mitochondrial (Fragment) OS=Homo sapiens OX=9606 GN=HSPD1 PE=1 SV=1
36	458606	sp|P06733|ENOA_HUMAN	54.07	2	2		47169	Alpha-enolase OS=Homo sapiens OX=9606 GN=ENO1 PE=1 SV=2
39	458607	sp|P06748|NPM_HUMAN	56.84	1	1		32575	Nucleophosmin OS=Homo sapiens OX=9606 GN=NPM1 PE=1 SV=2
17	458608	tr|A0A1W2PP22|A0A1W2PP22_HUMAN	61.61	1	1		19643	Heterogeneous nuclear ribonucleoprotein U (Fragment) OS=Homo sapiens OX=9606 GN=HNRNPU PE=1 SV=1
124	458609	sp|Q96QK1|VPS35_HUMAN	55.9	1	1		91707	Vacuolar protein sorting-associated protein 35 OS=Homo sapiens OX=9606 GN=VPS35 PE=1 SV=2
95	458610	sp|P18124|RL7_HUMAN	56.42	1	1		29226	60S ribosomal protein L7 OS=Homo sapiens OX=9606 GN=RPL7 PE=1 SV=1
26	458611	tr|G3V0E5|G3V0E5_HUMAN	53.19	1	1		75964	Transferrin receptor (P90 CD71) isoform CRA_c OS=Homo sapiens OX=9606 GN=TFRC PE=1 SV=1
24	458612	sp|P02786|TFR1_HUMAN	51.31	1	1		84871	Transferrin receptor protein 1 OS=Homo sapiens OX=9606 GN=TFRC PE=1 SV=2
127	458613	tr|E9PKT2|E9PKT2_HUMAN	49.97	1	1		4691	60S ribosomal protein L27a OS=Homo sapiens OX=9606 GN=RPL27A PE=1 SV=1
127	458614	tr|H0YF34|H0YF34_HUMAN	49.97	1	1		4724	60S ribosomal protein L27a (Fragment) OS=Homo sapiens OX=9606 GN=RPL27A PE=1 SV=1
37	458615	sp|O00299|CLIC1_HUMAN	59.17	2	2		26923	Chloride intracellular channel protein 1 OS=Homo sapiens OX=9606 GN=CLIC1 PE=1 SV=4
41	458616	sp|P04792|HSPB1_HUMAN	43.15	1	1		22783	Heat shock protein beta-1 OS=Homo sapiens OX=9606 GN=HSPB1 PE=1 SV=2
66	458617	tr|M0QZM1|M0QZM1_HUMAN	36.59	2	2		40052	Heterogeneous nuclear ribonucleoprotein M (Fragment) OS=Homo sapiens OX=9606 GN=HNRNPM PE=1 SV=1
129	458618	tr|M0R0X0|M0R0X0_HUMAN	41.9	1	1		11430	Tubulin beta-4A chain OS=Homo sapiens OX=9606 GN=TUBB4A PE=1 SV=1
129	458619	tr|M0QY85|M0QY85_HUMAN	41.9	1	1		11788	Tubulin beta-4A chain (Fragment) OS=Homo sapiens OX=9606 GN=TUBB4A PE=1 SV=1
129	458620	tr|M0QY37|M0QY37_HUMAN	41.9	1	1		12031	Tubulin beta-4A chain OS=Homo sapiens OX=9606 GN=TUBB4A PE=1 SV=1
129	458621	tr|M0QX14|M0QX14_HUMAN	41.9	1	1		12215	Tubulin beta-4A chain OS=Homo sapiens OX=9606 GN=TUBB4A PE=1 SV=1
129	458622	tr|A0A075B724|A0A075B724_HUMAN	41.9	1	1		12999	Tubulin beta-8 chain OS=Homo sapiens OX=9606 GN=TUBB8 PE=1 SV=1
129	458623	tr|M0QZL7|M0QZL7_HUMAN	41.9	1	1		16568	Tubulin beta-4A chain (Fragment) OS=Homo sapiens OX=9606 GN=TUBB4A PE=1 SV=8
129	458624	tr|M0R278|M0R278_HUMAN	41.9	1	1		17642	Tubulin beta-4A chain (Fragment) OS=Homo sapiens OX=9606 GN=TUBB4A PE=1 SV=1
45	458626	tr|C9JI87|C9JI87_HUMAN	39.31	1	1		20275	Voltage-dependent anion-selective channel protein 1 (Fragment) OS=Homo sapiens OX=9606 GN=VDAC1 PE=1 SV=6
42	458627	sp|P21796|VDAC1_HUMAN	42.09	1	1		30773	Voltage-dependent anion-selective channel protein 1 OS=Homo sapiens OX=9606 GN=VDAC1 PE=1 SV=2
44	458628	sp|P12235|ADT1_HUMAN	37.12	1	1	Oxidation (M)	33065	ADP/ATP translocase 1 OS=Homo sapiens OX=9606 GN=SLC25A4 PE=1 SV=4
44	458629	sp|P12236|ADT3_HUMAN	37.12	1	1	Oxidation (M)	32866	ADP/ATP translocase 3 OS=Homo sapiens OX=9606 GN=SLC25A6 PE=1 SV=4
44	458630	sp|P05141|ADT2_HUMAN	37.12	1	1	Oxidation (M)	32852	ADP/ATP translocase 2 OS=Homo sapiens OX=9606 GN=SLC25A5 PE=1 SV=7
57	458631	sp|P46531|NOTC1_HUMAN	28.7	2	1	Carbamidomethylation	272503	Neurogenic locus notch homolog protein 1 OS=Homo sapiens OX=9606 GN=NOTCH1 PE=1 SV=4
66	458638	tr|M0R2I7|M0R2I7_HUMAN	36.59	2	2		22708	Heterogeneous nuclear ribonucleoprotein M (Fragment) OS=Homo sapiens OX=9606 GN=HNRNPM PE=1 SV=1
132	458640	tr|A0A087WVQ9|A0A087WVQ9_HUMAN	31.88	1	1		47883	Elongation factor 1-alpha 1 OS=Homo sapiens OX=9606 GN=EEF1A1 PE=1 SV=1
82	458641	sp|Q5VTE0|EF1A3_HUMAN	33.57	1	1		50185	Putative elongation factor 1-alpha-like 3 OS=Homo sapiens OX=9606 GN=EEF1A1P5 PE=5 SV=1
82	458642	sp|Q05639|EF1A2_HUMAN	33.57	1	1		50470	Elongation factor 1-alpha 2 OS=Homo sapiens OX=9606 GN=EEF1A2 PE=1 SV=1
132	458643	tr|A0A2U3TZH3|A0A2U3TZH3_HUMAN	31.88	1	1		54341	Elongation factor 1-alpha OS=Homo sapiens OX=9606 GN=EEF1A2 PE=1 SV=1
68	458644	tr|M0R0K9|M0R0K9_HUMAN	25.83	1	1		48435	Transcription intermediary factor 1-beta (Fragment) OS=Homo sapiens OX=9606 GN=TRIM28 PE=1 SV=1
59	458645	sp|Q13263|TIF1B_HUMAN	26.14	1	1		88550	Transcription intermediary factor 1-beta OS=Homo sapiens OX=9606 GN=TRIM28 PE=1 SV=5
104	458646	sp|P83731|RL24_HUMAN	30.53	1	1		17779	60S ribosomal protein L24 OS=Homo sapiens OX=9606 GN=RPL24 PE=1 SV=1
106	458662	tr|D6RC37|D6RC37_HUMAN	27.93	1	1		7119	Activated RNA polymerase II transcriptional coactivator p15 (Fragment) OS=Homo sapiens OX=9606 GN=SUB1 PE=1 SV=8
106	458667	sp|B7ZAQ6|GPHRA_HUMAN	27.93	1	1		52917	Golgi pH regulator A OS=Homo sapiens OX=9606 GN=GPR89A PE=1 SV=2
108	458680	sp|Q8TD06|AGR3_HUMAN	26.62	1	1	Oxidation (M)	19171	Anterior gradient protein 3 OS=Homo sapiens OX=9606 GN=AGR3 PE=1 SV=1
108	458681	sp|O95994|AGR2_HUMAN	26.62	1	1	Oxidation (M)	19979	Anterior gradient protein 2 homolog OS=Homo sapiens OX=9606 GN=AGR2 PE=1 SV=1
66	458682	tr|M0QY96|M0QY96_HUMAN	27.41	1	1		12462	Heterogeneous nuclear ribonucleoprotein M (Fragment) OS=Homo sapiens OX=9606 GN=HNRNPM PE=1 SV=1
103	458688	sp|P30041|PRDX6_HUMAN	30.28	1	1		25035	Peroxiredoxin-6 OS=Homo sapiens OX=9606 GN=PRDX6 PE=1 SV=3
110	458696	sp|P42167|LAP2B_HUMAN	22.87	1	1		50670	Lamina-associated polypeptide 2 isoforms beta/gamma OS=Homo sapiens OX=9606 GN=TMPO PE=1 SV=2
86	458700	sp|Q96SN8|CK5P2_HUMAN	21.9	1	1		215036	CDK5 regulatory subunit-associated protein 2 OS=Homo sapiens OX=9606 GN=CDK5RAP2 PE=1 SV=5
47	458707	sp|Q9HC58|NCKX3_HUMAN	35.74	2	1		71992	Sodium/potassium/calcium exchanger 3 OS=Homo sapiens OX=9606 GN=SLC24A3 PE=2 SV=4
112	458730	sp|P29401|TKT_HUMAN	29.34	2	1		67878	Transketolase OS=Homo sapiens OX=9606 GN=TKT PE=1 SV=3
89	458739	sp|Q14999|CUL7_HUMAN	23.91	1	1		191159	Cullin-7 OS=Homo sapiens OX=9606 GN=CUL7 PE=1 SV=2
137	458745	tr|A0A2R8Y5T7|A0A2R8Y5T7_HUMAN	24.21	1	1		39768	Glutathione synthetase (Fragment) OS=Homo sapiens OX=9606 GN=GSS PE=1 SV=1
110	458746	sp|P48637|GSHB_HUMAN	24.08	1	1		52385	Glutathione synthetase OS=Homo sapiens OX=9606 GN=GSS PE=1 SV=1
116	458813	sp|P26373|RL13_HUMAN	22.67	1	1		24261	60S ribosomal protein L13 OS=Homo sapiens OX=9606 GN=RPL13 PE=1 SV=4
59	458826	tr|M0R288|M0R288_HUMAN	22.06	1	1		16221	Zinc finger protein 397 (Fragment) OS=Homo sapiens OX=9606 GN=ZNF397 PE=1 SV=8
148	458828	sp|Q8TEU7|RPGF6_HUMAN	21.4	1	1		179422	Rap guanine nucleotide exchange factor 6 OS=Homo sapiens OX=9606 GN=RAPGEF6 PE=1 SV=2
112	458829	tr|M0R113|M0R113_HUMAN	21.51	1	1		11964	Zinc finger protein 333 OS=Homo sapiens OX=9606 GN=ZNF333 PE=1 SV=1
112	458839	tr|M0R1P1|M0R1P1_HUMAN	21.51	1	1		17855	Zinc finger protein 333 OS=Homo sapiens OX=9606 GN=ZNF333 PE=4 SV=1
76	458922	sp|Q8N5I2|ARRD1_HUMAN	36.08	2	2		45981	Arrestin domain-containing protein 1 OS=Homo sapiens OX=9606 GN=ARRDC1 PE=1 SV=1
124	458932	sp|P35241|RADI_HUMAN	21.16	1	1	Oxidation (M)	68564	Radixin OS=Homo sapiens OX=9606 GN=RDX PE=1 SV=1
120	458989	sp|P04433|KV311_HUMAN	22.13	1	1	Carbamidomethylation	12575	Immunoglobulin kappa variable 3-11 OS=Homo sapiens OX=9606 GN=IGKV3-11 PE=1 SV=1
120	458991	tr|A0A0C4DH90|A0A0C4DH90_HUMAN	22.13	1	1	Carbamidomethylation	12586	Immunoglobulin kappa variable 3/OR2-268 (non-functional) (Fragment) OS=Homo sapiens OX=9606 GN=IGKV3OR2-268 PE=4 SV=5
120	458992	sp|P01619|KV320_HUMAN	22.13	1	1	Carbamidomethylation	12557	Immunoglobulin kappa variable 3-20 OS=Homo sapiens OX=9606 GN=IGKV3-20 PE=1 SV=2
120	458993	sp|A0A0C4DH55|KVD07_HUMAN	22.13	1	1	Carbamidomethylation	13148	Immunoglobulin kappa variable 3D-7 OS=Homo sapiens OX=9606 GN=IGKV3D-7 PE=3 SV=5
59	459000	sp|Q01959|SC6A3_HUMAN	22.06	1	1		68495	Sodium-dependent dopamine transporter OS=Homo sapiens OX=9606 GN=SLC6A3 PE=1 SV=1
86	459088	sp|P17040|ZSC20_HUMAN	21.72	1	1		117541	Zinc finger and SCAN domain-containing protein 20 OS=Homo sapiens OX=9606 GN=ZSCAN20 PE=1 SV=3
93	459200	sp|Q96RP9|EFGM_HUMAN	22.8	1	1		83472	Elongation factor G mitochondrial OS=Homo sapiens OX=9606 GN=GFM1 PE=1 SV=2
52	459767	sp|Q92538|GBF1_HUMAN	21.38	1	1		206444	Golgi-specific brefeldin A-resistance guanine nucleotide exchange factor 1 OS=Homo sapiens OX=9606 GN=GBF1 PE=1 SV=2
63	459980	sp|Q75VX8|GARE2_HUMAN	21.21	1	1		92882	GRB2-associated and regulator of MAPK protein 2 OS=Homo sapiens OX=9606 GN=GAREM2 PE=1 SV=3
122	460263	sp|O14745|NHRF1_HUMAN	26.4	1	1	Mutation	38868	Na(+)/H(+) exchange regulatory cofactor NHE-RF1 OS=Homo sapiens OX=9606 GN=SLC9A3R1 PE=1 SV=4
76	468019	sp|Q6W2J9|BCOR_HUMAN	26.45	1	1		192187	BCL-6 corepressor OS=Homo sapiens OX=9606 GN=BCOR PE=1 SV=1
13	472599	sp|P0DPK5|H3Y2_HUMAN	38.66	2	1	Mutation	16466	Histone H3.X OS=Homo sapiens OX=9606 GN=H3Y2 PE=5 SV=1
100	476680	B4DRR0|B4DRR0_HUMAN	35.99	1	1		57839	cDNA FLJ53910 highly similar to Keratin type II cytoskeletal 6A OS=Homo sapiens OX=9606 PE=2 SV=1
100	476688	A0A0S2Z427|A0A0S2Z427_HUMAN	35.99	1	1		9268	Keratin 6A isoform 2 OS=Homo sapiens OX=9606 GN=KRT6A PE=2 SV=1
156	476745	A4D1A8|A4D1A8_HUMAN	26.67	2	1		411165	Similar to Piccolo protein (Aczonin) OS=Homo sapiens OX=9606 GN=LOC392742 PE=4 SV=1
40	476799	A0A7P0T890|A0A7P0T890_HUMAN	30	2	1		888399	Dystonin OS=Homo sapiens OX=9606 GN=DST PE=4 SV=1
76	476849	E3UVQ2|E3UVQ2_HUMAN	26.45	1	1		211202	BCL6 corepressor/retinoic acid receptor alpha fusion protein OS=Homo sapiens OX=9606 GN=BCOR-RARA PE=2 SV=1
76	476852	H9A532|H9A532_HUMAN	26.45	1	1		337724	BCL6 corepressor-cyclin B3 fusion protein OS=Homo sapiens OX=9606 PE=2 SV=1
89	477032	A0A669KBH4|A0A669KBH4_HUMAN	23.91	1	1		194417	Cullin-7 OS=Homo sapiens OX=9606 GN=CUL7 PE=1 SV=1
84	477105	E9PPJ1|E9PPJ1_HUMAN	20.51	1	1		195646	Kinetochore scaffold 1 OS=Homo sapiens OX=9606 GN=KNL1 PE=1 SV=2
122	477222	E7EPG1|E7EPG1_HUMAN	20.3	1	1		110752	Multimerin-1 OS=Homo sapiens OX=9606 GN=MMRN1 PE=1 SV=1
49	477652	D3DS14|D3DS14_HUMAN	23.05	1	1		164645	Uncharacterized protein OS=Homo sapiens OX=9606 GN=FLJ10357 PE=4 SV=1
191	477834	Q59FF5|Q59FF5_HUMAN	25.63	2	1		164920	Myosin Va variant (Fragment) OS=Homo sapiens OX=9606 PE=2 SV=1
152	477919	H0Y390|H0Y390_HUMAN	35.07	3	1		505767	Microtubule-actin cross-linking factor 1 isoforms 1/2/3/5 (Fragment) OS=Homo sapiens OX=9606 GN=MACF1 PE=1 SV=1
118	478067	A0A0A0MSA1|A0A0A0MSA1_HUMAN	22	1	1		243659	Voltage-dependent L-type calcium channel subunit alpha OS=Homo sapiens OX=9606 GN=CACNA1C PE=1 SV=1
59	478101	B2R8R5|B2R8R5_HUMAN	26.14	1	1		88560	cDNA FLJ94025 highly similar to Homo sapiens tripartite motif-containing 28 (TRIM28) mRNA OS=Homo sapiens OX=9606 PE=2 SV=1
62	478269	B3KRG5|B3KRG5_HUMAN	30.08	1	1		28020	cDNA FLJ34201 fis clone FCBBF3019714 highly similar to HETEROGENEOUS NUCLEAR RIBONUCLEOPROTEIN G OS=Homo sapiens OX=9606 PE=2 SV=1
62	478270	H3BUY5|H3BUY5_HUMAN	30.08	1	1		28745	RNA-binding motif protein X chromosome OS=Homo sapiens OX=9606 GN=RBMX PE=1 SV=1
62	478271	B4E352|B4E352_HUMAN	30.08	1	1		38071	cDNA FLJ54953 highly similar to Heterogeneous nuclear ribonucleoprotein G OS=Homo sapiens OX=9606 PE=2 SV=1
193	478695	A0A7P0TAI3|A0A7P0TAI3_HUMAN	28.33	2	1		525039	Histone-lysine N-methyltransferase 2C OS=Homo sapiens OX=9606 GN=KMT2C PE=4 SV=1
6	481487	A0A0S2Z3K0|A0A0S2Z3K0_HUMAN	48.5	4	3	Mutation	44524	Collagen type I alpha 2 isoform 5 (Fragment) OS=Homo sapiens OX=9606 GN=COL1A2 PE=1 SV=1
13	481564	A0A024RCL8|A0A024RCL8_HUMAN	40.94	3	3		13890	Histone H2B OS=Homo sapiens OX=9606 GN=HIST1H2BK PE=3 SV=1
13	481565	A0A024QZZ7|A0A024QZZ7_HUMAN	40.94	3	3		13936	Histone H2B OS=Homo sapiens OX=9606 GN=HIST1H2BD PE=3 SV=1
13	481566	A0A024RCJ2|A0A024RCJ2_HUMAN	40.94	3	3		13904	Histone H2B OS=Homo sapiens OX=9606 GN=HIST1H2BJ PE=3 SV=1
72	481570	A0A0G2JNU3|A0A0G2JNU3_HUMAN	20.5	1	1		293898	Transcription factor TFIIIB component B'' homolog OS=Homo sapiens OX=9606 GN=BDP1 PE=1 SV=1
13	481573	U3KQK0|U3KQK0_HUMAN	40.94	3	3		18804	Histone H2B OS=Homo sapiens OX=9606 GN=H2BC15 PE=1 SV=1
13	481574	B4DR52|B4DR52_HUMAN	40.94	3	3		18041	Histone H2B OS=Homo sapiens OX=9606 PE=2 SV=1
93	481630	F8WAU4|F8WAU4_HUMAN	22.8	1	1		50912	Elongation factor G mitochondrial OS=Homo sapiens OX=9606 GN=GFM1 PE=1 SV=1
93	481631	E5KND7|E5KND7_HUMAN	22.8	1	1		83486	Elongation factor G mitochondrial OS=Homo sapiens OX=9606 GN=GFM1 PE=3 SV=1
134	481787	H0Y465|H0Y465_HUMAN	20.18	1	1		281214	Neurofibromin (Fragment) OS=Homo sapiens OX=9606 GN=NF1 PE=1 SV=1
49	481887	D3DS15|D3DS15_HUMAN	23.05	1	1		162787	Uncharacterized protein OS=Homo sapiens OX=9606 GN=FLJ10357 PE=4 SV=1
23	481915	A0A7P0TAT7|A0A7P0TAT7_HUMAN	50.9	2	1		32057	4F2 cell-surface antigen heavy chain OS=Homo sapiens OX=9606 GN=SLC3A2 PE=4 SV=1
118	482073	Q59GU3|Q59GU3_HUMAN	22	1	1		95954	Voltage-dependent L-type calcium channel subunit alpha (Fragment) OS=Homo sapiens OX=9606 PE=2 SV=1
118	482074	F5H522|F5H522_HUMAN	22	1	1		242404	Voltage-dependent L-type calcium channel subunit alpha OS=Homo sapiens OX=9606 GN=CACNA1C PE=1 SV=1
67	482393	A0A087X0X3|A0A087X0X3_HUMAN	26.15	1	1		77570	Heterogeneous nuclear ribonucleoprotein M OS=Homo sapiens OX=9606 GN=HNRNPM PE=1 SV=1
295	482537	A0A2R8Y706|A0A2R8Y706_HUMAN	26.74	2	1		526943	Cytoplasmic dynein 1 heavy chain 1 OS=Homo sapiens OX=9606 GN=DYNC1H1 PE=1 SV=2
17	483303	A0A1W2PPS1|A0A1W2PPS1_HUMAN	44.24	3	2	Mutation	88318	Heterogeneous nuclear ribonucleoprotein U OS=Homo sapiens OX=9606 GN=HNRNPU PE=1 SV=1
119	483437	B7Z7Y1|B7Z7Y1_HUMAN	21.77	1	1		136844	Rap guanine nucleotide exchange factor 6 OS=Homo sapiens OX=9606 GN=RAPGEF6 PE=1 SV=1
52	483438	A8K899|A8K899_HUMAN	22.18	1	1		48883	ADA3 homolog OS=Homo sapiens OX=9606 PE=2 SV=1
83	483468	I0B0K7|I0B0K7_HUMAN	31.6	1	1		294482	Truncated profilaggrin OS=Homo sapiens OX=9606 GN=FLG PE=4 SV=1
61	483986	A0A7P0T9K9|A0A7P0T9K9_HUMAN	32.42	1	1		49581	Protein disulfide-isomerase OS=Homo sapiens OX=9606 GN=P4HB PE=4 SV=1
61	483988	I3L0S0|I3L0S0_HUMAN	32.42	1	1		52549	Protein disulfide-isomerase OS=Homo sapiens OX=9606 GN=P4HB PE=1 SV=2
61	483989	I3L3P5|I3L3P5_HUMAN	32.42	1	1		53227	Protein disulfide-isomerase OS=Homo sapiens OX=9606 GN=P4HB PE=1 SV=2
61	483990	A0A7P0TA97|A0A7P0TA97_HUMAN	32.42	1	1		53581	Protein disulfide-isomerase OS=Homo sapiens OX=9606 GN=P4HB PE=4 SV=1
61	483991	A0A7P0T8X1|A0A7P0T8X1_HUMAN	32.42	1	1		54015	Protein disulfide-isomerase OS=Homo sapiens OX=9606 GN=P4HB PE=4 SV=1
61	483992	A0A7P0T8C0|A0A7P0T8C0_HUMAN	32.42	1	1		54310	Protein disulfide-isomerase OS=Homo sapiens OX=9606 GN=P4HB PE=4 SV=1
61	483993	A0A7P0T9U6|A0A7P0T9U6_HUMAN	32.42	1	1		54687	Protein disulfide-isomerase OS=Homo sapiens OX=9606 GN=P4HB PE=4 SV=1
61	483994	A0A7P0T8J3|A0A7P0T8J3_HUMAN	32.42	1	1		54911	Protein disulfide-isomerase OS=Homo sapiens OX=9606 GN=P4HB PE=4 SV=1
61	483995	B4DNL5|B4DNL5_HUMAN	32.42	1	1		55381	Protein disulfide-isomerase OS=Homo sapiens OX=9606 PE=2 SV=1
61	483996	A0A024R8S5|A0A024R8S5_HUMAN	32.42	1	1		57116	Protein disulfide-isomerase OS=Homo sapiens OX=9606 GN=P4HB PE=2 SV=1
61	483997	A0A7P0T9D6|A0A7P0T9D6_HUMAN	32.42	1	1		59008	Protein disulfide-isomerase OS=Homo sapiens OX=9606 GN=P4HB PE=4 SV=1
61	483998	A0A7P0TB26|A0A7P0TB26_HUMAN	32.42	1	1		59698	Protein disulfide-isomerase OS=Homo sapiens OX=9606 GN=P4HB PE=4 SV=1
61	483999	I3L4M2|I3L4M2_HUMAN	32.42	1	1		60835	Protein disulfide-isomerase OS=Homo sapiens OX=9606 GN=P4HB PE=1 SV=2
61	484000	A0A7P0TA35|A0A7P0TA35_HUMAN	32.42	1	1		61043	Protein disulfide-isomerase OS=Homo sapiens OX=9606 GN=P4HB PE=4 SV=1
61	484001	A0A7P0TA71|A0A7P0TA71_HUMAN	32.42	1	1		62032	Protein disulfide-isomerase OS=Homo sapiens OX=9606 GN=P4HB PE=4 SV=1
53	484347	H7BYX7|H7BYX7_HUMAN	20.5	1	1		161643	Lysophospholipase (Fragment) OS=Homo sapiens OX=9606 GN=PLB1 PE=1 SV=1
53	484348	B2RWP8|B2RWP8_HUMAN	20.5	1	1		162978	Lysophospholipase OS=Homo sapiens OX=9606 GN=PLB1 PE=2 SV=1
72	484461	H0YCV8|H0YCV8_HUMAN	20.5	1	1		66951	Transcription factor TFIIIB component B'' homolog (Fragment) OS=Homo sapiens OX=9606 GN=BDP1 PE=1 SV=1
82	484731	Q9NZS6|Q9NZS6_HUMAN	33.57	1	1		46269	Elongation factor 1-alpha (Fragment) OS=Homo sapiens OX=9606 PE=2 SV=1
55	485328	A0A024R2T5|A0A024R2T5_HUMAN	20.41	1	1		92874	CUB domain containing protein 1 isoform CRA_a OS=Homo sapiens OX=9606 GN=CDCP1 PE=4 SV=1
123	485516	sp|Q9NZN4|EHD2_HUMAN	20.23	1	1	Oxidation (M)	61162	EH domain-containing protein 2 OS=Homo sapiens OX=9606 GN=EHD2 PE=1 SV=2
33	486288	C9J0D1|C9J0D1_HUMAN	79.82	3	2		13163	Histone H2A OS=Homo sapiens OX=9606 GN=H2AZ2 PE=1 SV=1
33	486289	A0A494C189|A0A494C189_HUMAN	83.84	4	2		13496	Histone H2A OS=Homo sapiens OX=9606 GN=H2AZ1 PE=1 SV=1
57	486309	B4E244|B4E244_HUMAN	20.93	1	1		122259	cDNA FLJ55531 highly similar to Homo sapiens shroom (SHRM) mRNA OS=Homo sapiens OX=9606 PE=2 SV=1
105	486320	A0A499FJI4|A0A499FJI4_HUMAN	25.75	2	1		510091	RCR-type E3 ubiquitin transferase OS=Homo sapiens OX=9606 GN=MYCBP2 PE=1 SV=1
57	486321	A0A2R8Y5P9|A0A2R8Y5P9_HUMAN	20.93	1	1		208048	Protein Shroom3 OS=Homo sapiens OX=9606 GN=SHROOM3 PE=1 SV=1
10	486417	Q0D2M2|Q0D2M2_HUMAN	77.01	7	2		13834	HIST1H2BC protein OS=Homo sapiens OX=9606 GN=HIST1H2BC PE=2 SV=1
10	486418	B2R4S9|B2R4S9_HUMAN	77.01	7	2		13906	Histone H2B OS=Homo sapiens OX=9606 GN=HIST1H2BC PE=2 SV=1
13	486419	A0A024RCJ9|A0A024RCJ9_HUMAN	40.94	3	3		13922	Histone H2B OS=Homo sapiens OX=9606 GN=HIST1H2BN PE=3 SV=1
13	486420	I6L9F7|I6L9F7_HUMAN	40.94	3	3		15157	Histone H2B (Fragment) OS=Homo sapiens OX=9606 GN=HIST1H2BM PE=2 SV=1
48	486422	A8K9K6|A8K9K6_HUMAN	24.8	1	1		65978	cDNA FLJ76962 highly similar to Homo sapiens nucleolar protein 5A (56kDa with KKE/D repeat) (NOL5A) mRNA OS=Homo sapiens OX=9606 PE=2 SV=1
57	486449	B3KY47|B3KY47_HUMAN	20.93	1	1		192593	cDNA FLJ46841 fis clone UTERU3000670 highly similar to Homo sapiens shroom (SHRM) mRNA OS=Homo sapiens OX=9606 PE=2 SV=1
57	486469	Q6ZVL3|Q6ZVL3_HUMAN	20.93	1	1		87858	cDNA FLJ42424 fis clone BLADE2004089 moderately similar to Mus musculus PDZ domain actin binding protein Shroom mRNA (Fragment) OS=Homo sapiens OX=9606 PE=2 SV=1
93	486740	C9IZ01|C9IZ01_HUMAN	22.8	1	1		66035	Elongation factor G mitochondrial OS=Homo sapiens OX=9606 GN=GFM1 PE=1 SV=1
70	486847	A0A2X0SFJ0|A0A2X0SFJ0_HUMAN	26.38	1	1		341825	Non-specific serine/threonine protein kinase (Fragment) OS=Homo sapiens OX=9606 GN=TRIO PE=3 SV=1
85	486969	A0A0G2JRG8|A0A0G2JRG8_HUMAN	20.08	1	1		96191	Rho GTPase-activating protein 27 OS=Homo sapiens OX=9606 GN=ARHGAP27 PE=1 SV=1
85	486970	E9PIR1|E9PIR1_HUMAN	20.08	1	1		96102	Rho GTPase-activating protein 27 OS=Homo sapiens OX=9606 GN=ARHGAP27 PE=1 SV=1
85	486974	A0A0G2JNY3|A0A0G2JNY3_HUMAN	20.08	1	1		98485	Rho GTPase-activating protein 27 OS=Homo sapiens OX=9606 GN=ARHGAP27 PE=1 SV=1
52	487424	Q9H6X9|Q9H6X9_HUMAN	30.25	2	1		41613	cDNA: FLJ21717 fis clone COL10322 OS=Homo sapiens OX=9606 PE=2 SV=1
55	487836	M0QZQ3|M0QZQ3_HUMAN	26.9	1	1	Oxidation (M)	225488	Spectrin beta chain OS=Homo sapiens OX=9606 GN=SPTBN4 PE=1 SV=1
118	487843	A0A0A0MR67|A0A0A0MR67_HUMAN	22	1	1		243456	Voltage-dependent L-type calcium channel subunit alpha OS=Homo sapiens OX=9606 GN=CACNA1C PE=1 SV=1
118	487845	F5GY28|F5GY28_HUMAN	22	1	1		247161	Voltage-dependent L-type calcium channel subunit alpha OS=Homo sapiens OX=9606 GN=CACNA1C PE=1 SV=1
118	487846	E9PDI6|E9PDI6_HUMAN	22	1	1		247113	Voltage-dependent L-type calcium channel subunit alpha OS=Homo sapiens OX=9606 GN=CACNA1C PE=1 SV=1
32	488448	B3KY79|B3KY79_HUMAN	31.66	2	2	Mutation	49035	cDNA FLJ46620 fis clone TLUNG2000654 highly similar to Keratin type II cytoskeletal 7 OS=Homo sapiens OX=9606 PE=2 SV=1
31	488451	Q16195|Q16195_HUMAN	30.26	1	1		27667	Keratin (Fragment) OS=Homo sapiens OX=9606 GN=keratin PE=2 SV=1
30	488468	F8VQY3|F8VQY3_HUMAN	32.58	2	1		19118	Keratin type II cytoskeletal 8 (Fragment) OS=Homo sapiens OX=9606 GN=KRT8 PE=1 SV=1
30	488469	F8VUG2|F8VUG2_HUMAN	32.58	2	1		30907	Keratin type II cytoskeletal 8 (Fragment) OS=Homo sapiens OX=9606 GN=KRT8 PE=1 SV=1
30	488470	F8W1U3|F8W1U3_HUMAN	32.58	2	1		32549	Keratin type II cytoskeletal 8 (Fragment) OS=Homo sapiens OX=9606 GN=KRT8 PE=1 SV=1
25	488517	C9JM50|C9JM50_HUMAN	35.34	1	1		20843	Keratin type I cytoskeletal 19 (Fragment) OS=Homo sapiens OX=9606 GN=KRT19 PE=1 SV=1
52	488771	A8K3W9|A8K3W9_HUMAN	30.25	2	1		41612	cDNA FLJ77842 OS=Homo sapiens OX=9606 PE=2 SV=1
74	489434	Q53G41|Q53G41_HUMAN	28.78	1	1		65817	Tripartite motif protein TRIM29 isoform alpha variant (Fragment) OS=Homo sapiens OX=9606 PE=2 SV=1
74	489435	A0A024R3J1|A0A024R3J1_HUMAN	28.78	1	1		65835	Tripartite motif-containing 29 isoform CRA_a OS=Homo sapiens OX=9606 GN=TRIM29 PE=4 SV=1
12	489646	B7Z5E7|B7Z5E7_HUMAN	103.62	4	4		55084	60 kDa chaperonin OS=Homo sapiens OX=9606 PE=2 SV=1
12	489647	B7Z597|B7Z597_HUMAN	107.22	5	5		60048	60 kDa chaperonin OS=Homo sapiens OX=9606 PE=2 SV=1
50	489699	H7C1I7|H7C1I7_HUMAN	21.39	1	1		134427	Zinc finger MYM-type protein 4 (Fragment) OS=Homo sapiens OX=9606 GN=ZMYM4 PE=1 SV=1
42	489835	B3KXW2|B3KXW2_HUMAN	20.63	1	1		141706	cDNA FLJ46178 fis clone TESTI4003944 highly similar to Homo sapiens zinc finger protein 532 (ZNF532) mRNA OS=Homo sapiens OX=9606 PE=2 SV=1
81	489854	A0A024R223|A0A024R223_HUMAN	24.27	2	2		339188	Vacuolar protein sorting 13A (Yeast) isoform CRA_c OS=Homo sapiens OX=9606 GN=VPS13A PE=3 SV=1
12	491777	Q6N097|Q6N097_HUMAN	85.74	3	3	Carbamidomethylation	52759	Uncharacterized protein DKFZp686H20196 OS=Homo sapiens OX=9606 GN=DKFZp686H20196 PE=2 SV=1
12	491783	A0A4W9A917|A0A4W9A917_HUMAN	80.59	2	2	Carbamidomethylation	41335	Immunoglobulin heavy constant gamma 3 (Fragment) OS=Homo sapiens OX=9606 GN=IGHG3 PE=1 SV=1
96	29771	Q7Z401|MYCPP_HUMAN	21.59	1	1	Oxidation (M)	209243	C-myc promoter-binding protein OS=Homo sapiens OX=9606 GN=DENND4A PE=1 SV=2
23	14759	tr|E7EN95|E7EN95_HUMAN	33.8	2	1		256278	Filamin-B OS=Homo sapiens GN=FLNB PE=2 SV=1
108	51654	sp|Q15149|PLEC_HUMAN	22.16	1	1		531796	Plectin OS=Homo sapiens OX=9606 GN=PLEC PE=1 SV=3
61	56406	P25940|CO5A3_HUMAN	23.24	1	1		172120	Collagen alpha-3(V) chain OS=Homo sapiens OX=9606 GN=COL5A3 PE=1 SV=3
60	69050	tr|F8VNV9|F8VNV9_HUMAN	21.2	1	1		187665	C4b-B OS=Homo sapiens GN=C4B PE=2 SV=1
47	482457	A0A2X0TVX1|A0A2X0TVX1_HUMAN	24.22	1	1		229782	DOCK6 (Fragment) OS=Homo sapiens OX=9606 GN=DOCK6 PE=3 SV=1

## Sheet: Normal vs SIL
Protein Group	Protein ID	Accession	-10lgP	#Peptides	#Unique	PTM	Avg. Mass	Description
78	56	tr|D6RHD5|D6RHD5_HUMAN	41.94	1	1		52059	Serum albumin OS=Homo sapiens GN=ALB PE=2 SV=1
19	77	P35908|K22E_HUMAN	102	12	1	Carbamidomethylation	65433	Keratin type II cytoskeletal 2 epidermal OS=Homo sapiens GN=KRT2 PE=1 SV=2
28	124	tr|C9JTX5|C9JTX5_HUMAN	32.28	1	1		8534	Actin cytoplasmic 1 (Fragment) OS=Homo sapiens GN=ACTB PE=2 SV=1
50	209	P01859|IGHG2_HUMAN	91.41	4	1	Carbamidomethylation	35901	Ig gamma-2 chain C region OS=Homo sapiens GN=IGHG2 PE=1 SV=2
50	211	tr|Q6N093|Q6N093_HUMAN	91.41	4	1	Carbamidomethylation	46061	Putative uncharacterized protein DKFZp686I04196 (Fragment) OS=Homo sapiens GN=DKFZp686I04196 PE=1 SV=1
51	285	P35555|FBN1_HUMAN	30.7	1	1	Carbamidomethylation	312237	Fibrillin-1 OS=Homo sapiens GN=FBN1 PE=1 SV=3
58	287	tr|Q9BX83|Q9BX83_HUMAN	27.79	1	1		10710	Hemoglobin alpha 1 globin chain (Fragment) OS=Homo sapiens GN=HBA1 PE=2 SV=1
64	950	tr|Q14222|Q14222_HUMAN	30.03	1	1		24196	EEF1A protein (Fragment) OS=Homo sapiens GN=EEF1A PE=1 SV=1
34	1339	Q8N1N4|K2C78_HUMAN	74.27	4	2	Carbamidomethylation	56866	Keratin type II cytoskeletal 78 OS=Homo sapiens GN=KRT78 PE=2 SV=2
60	1343	P02790|HEMO_HUMAN	69.86	2	2	Carbamidomethylation	51676	Hemopexin OS=Homo sapiens GN=HPX PE=1 SV=2
68	1429	tr|Q6NS95|Q6NS95_HUMAN	67.92	2	2	Carbamidomethylation	25148	IGL@ protein OS=Homo sapiens GN=IGL@ PE=2 SV=1
68	1437	tr|Q96E61|Q96E61_HUMAN	67.92	2	2	Carbamidomethylation	24713	Putative uncharacterized protein OS=Homo sapiens PE=2 SV=1
43	3368	tr|H0YNP5|H0YNP5_HUMAN	33.57	1	1		19727	Annexin (Fragment) OS=Homo sapiens GN=ANXA2 PE=3 SV=1
43	3373	tr|H0YM50|H0YM50_HUMAN	33.57	1	1		28379	Annexin (Fragment) OS=Homo sapiens GN=ANXA2 PE=3 SV=1
32	3376	A6NMY6|AXA2L_HUMAN	47.73	2	2		38659	Putative annexin A2-like protein OS=Homo sapiens GN=ANXA2P2 PE=5 SV=2
38	5038	tr|B4E0A4|B4E0A4_HUMAN	39.51	2	2		132558	cDNA FLJ57023 highly similar to Homo sapiens collagen type VI alpha 3 (COL6A3) transcript variant 3 mRNA OS=Homo sapiens PE=2 SV=1
51	7501	tr|B4E3I6|B4E3I6_HUMAN	30.7	1	1	Carbamidomethylation	124381	cDNA FLJ61597 highly similar to Fibrillin-1 (Fragment) OS=Homo sapiens PE=2 SV=1
39	7696	tr|Q4LE79|Q4LE79_HUMAN	109.41	6	6	Carbamidomethylation	265192	DSP variant protein (Fragment) OS=Homo sapiens GN=DSP variant protein PE=2 SV=1
39	7700	tr|D7RX09|D7RX09_HUMAN	109.41	6	6	Carbamidomethylation	278914	Desmoplakin Ia OS=Homo sapiens PE=2 SV=1
18	7711	P15924|DESP_HUMAN	142.02	28	28	Carbamidomethylation	331774	Desmoplakin OS=Homo sapiens GN=DSP PE=1 SV=3
83	9574	tr|E7EQL8|E7EQL8_HUMAN	28.46	1	1		163907	Gamma-tubulin complex component 6 OS=Homo sapiens GN=TUBGCP6 PE=2 SV=1
66	18169	Q9UPA5|BSN_HUMAN	33.06	1	1	Acetylation (N-term)	416475	Protein bassoon OS=Homo sapiens OX=9606 GN=BSN PE=1 SV=4
54	34338	Q9H2D6|TARA_HUMAN	20.21	1	1		261373	TRIO and F-actin-binding protein OS=Homo sapiens OX=9606 GN=TRIOBP PE=1 SV=3
12	37994	sp|P02452|CO1A1_HUMAN	27.42	1	1		138942	Collagen alpha-1(I) chain OS=Homo sapiens OX=9606 GN=COL1A1 PE=1 SV=5
74	39253	P05997|CO5A2_HUMAN	28.65	1	1		144910	Collagen alpha-2(V) chain OS=Homo sapiens OX=9606 GN=COL5A2 PE=1 SV=3
5	48466	sp|P02461|CO3A1_HUMAN	43.71	2	2		138564	Collagen alpha-1(III) chain OS=Homo sapiens OX=9606 GN=COL3A1 PE=1 SV=4
13	48470	sp|P02458|CO2A1_HUMAN	32.99	2	2		141786	Collagen alpha-1(II) chain OS=Homo sapiens OX=9606 GN=COL2A1 PE=1 SV=3
5	48471	sp|Q02388|CO7A1_HUMAN	34.39	2	2		295216	Collagen alpha-1(VII) chain OS=Homo sapiens OX=9606 GN=COL7A1 PE=1 SV=2
242	48570	sp|Q9UPN4|CP131_HUMAN	26.89	2	1		122149	Centrosomal protein of 131 kDa OS=Homo sapiens OX=9606 GN=CEP131 PE=1 SV=3
24	49292	tr|A0A494C071|A0A494C071_HUMAN	23.22	1	1		217771	Uncharacterized protein OS=Homo sapiens OX=9606 PE=4 SV=1
34	49902	sp|P35527|K1C9_HUMAN	40.5	2	2		62064	Keratin type I cytoskeletal 9 OS=Homo sapiens OX=9606 GN=KRT9 PE=1 SV=3
17	51581	sp|Q5VT06|CE350_HUMAN	21.73	1	1		350931	Centrosome-associated protein 350 OS=Homo sapiens OX=9606 GN=CEP350 PE=1 SV=1
58	57778	P20930|FILA_HUMAN	37.47	1	1		435180	Filaggrin OS=Homo sapiens OX=9606 GN=FLG PE=1 SV=3
15	68467	tr|Q9HAR8|Q9HAR8_HUMAN	76.27	3	2	Mutation	3293	Mutant beta-globin (Fragment) OS=Homo sapiens GN=HBB PE=3 SV=1
28	68493	tr|Q86UH9|Q86UH9_HUMAN	40.99	2	2		59017	Gag protein OS=Homo sapiens PE=4 SV=1
75	68499	P14923|PLAK_HUMAN	32.28	1	1		81745	Junction plakoglobin OS=Homo sapiens GN=JUP PE=1 SV=3
62	68730	tr|Q8NGB0|Q8NGB0_HUMAN	21.9	1	1		156507	Seven transmembrane helix receptor OS=Homo sapiens GN=GPR142 PE=2 SV=1
74	70910	tr|B4DNJ0|B4DNJ0_HUMAN	28.65	1	1		56474	cDNA FLJ60734 highly similar to Collagen alpha-2(V) chain OS=Homo sapiens PE=2 SV=1
74	71204	tr|Q5PR22|Q5PR22_HUMAN	29.73	1	1		109643	COL5A2 protein OS=Homo sapiens GN=COL5A2 PE=2 SV=1
58	72489	tr|A8K5I6|A8K5I6_HUMAN	38.1	1	1		53561	cDNA FLJ78643 highly similar to Homo sapiens cornulin (CRNN) mRNA OS=Homo sapiens PE=2 SV=1
70	72490	Q9UBG3|CRNN_HUMAN	65.77	1	1		53533	Cornulin OS=Homo sapiens GN=CRNN PE=1 SV=1
89	72486	tr|A7MBM9|A7MBM9_HUMAN	23.78	1	1		191387	ATP-binding cassette sub-family A (ABC1) member 3 OS=Homo sapiens GN=ABCA3 PE=2 SV=1
75	72551	tr|Q9BYF7|Q9BYF7_HUMAN	21.42	1	1		42287	SCCA2b OS=Homo sapiens GN=SCCA2 PE=2 SV=1
75	72552	tr|H0Y5H9|H0Y5H9_HUMAN	21.42	1	1		42507	Serpin B4 (Fragment) OS=Homo sapiens GN=SERPINB4 PE=3 SV=1
75	72553	tr|Q5K684|Q5K684_HUMAN	21.42	1	1		44770	SCCA1/SCCA2 fusion protein OS=Homo sapiens PE=2 SV=1
75	72555	tr|Q5K633|Q5K633_HUMAN	21.42	1	1		44810	SCCA2/SCCA1 fusion protein isoform 2 OS=Homo sapiens PE=2 SV=1
75	72556	tr|A8K847|A8K847_HUMAN	21.42	1	1		44853	cDNA FLJ75229 highly similar to Homo sapiens serpin peptidase inhibitor clade B (ovalbumin) member 4 (SERPINB4) mRNA OS=Homo sapiens PE=2 SV=1
75	72557	P48594|SPB4_HUMAN	21.42	1	1		44854	Serpin B4 OS=Homo sapiens GN=SERPINB4 PE=1 SV=2
75	72558	tr|Q86W05|Q86W05_HUMAN	21.42	1	1		44830	Squamous cell carcinoma antigen 2 OS=Homo sapiens GN=SERPINB4 PE=2 SV=1
61	72730	tr|H3BQ34|H3BQ34_HUMAN	74.95	2	2		30720	Pyruvate kinase OS=Homo sapiens GN=PKM PE=3 SV=1
75	73302	tr|C9JZ65|C9JZ65_HUMAN	21.42	1	1		24374	Serpin B4 (Fragment) OS=Homo sapiens GN=SERPINB4 PE=2 SV=1
74	80353	Q2UY09|COSA1_HUMAN	20.58	1	1		116657	Collagen alpha-1(XXVIII) chain OS=Homo sapiens GN=COL28A1 PE=2 SV=2
51	94108	tr|Q59HB9|Q59HB9_HUMAN	30.7	1	1	Carbamidomethylation	90838	Fibrillin 1 variant (Fragment) OS=Homo sapiens PE=2 SV=1
51	94109	tr|H0YND0|H0YND0_HUMAN	30.7	1	1	Carbamidomethylation	93359	Fibrillin-1 (Fragment) OS=Homo sapiens GN=FBN1 PE=4 SV=1
78	98032	tr|Q5T3N1|Q5T3N1_HUMAN	46.91	1	1		22755	Annexin A1 (Fragment) OS=Homo sapiens GN=ANXA1 PE=4 SV=1
78	98033	tr|B4DL19|B4DL19_HUMAN	46.91	1	1		19589	Annexin OS=Homo sapiens PE=2 SV=1
91	98113	tr|J3QT83|J3QT83_HUMAN	24.9	1	1		92626	Collagen alpha-1(XIV) chain (Fragment) OS=Homo sapiens GN=COL14A1 PE=4 SV=1
38	98357	Q01469|FABP5_HUMAN	52.99	4	4		15164	Fatty acid-binding protein epidermal OS=Homo sapiens GN=FABP5 PE=1 SV=3
38	98358	tr|E7DVW5|E7DVW5_HUMAN	52.99	4	4		15164	Fatty acid binding protein 5 (Psoriasis-associated) OS=Homo sapiens GN=FABP5 PE=2 SV=1
13	99417	tr|Q5DT20|Q5DT20_HUMAN	140.1	17	17		282360	Hornerin OS=Homo sapiens GN=HRNR PE=2 SV=1
24	207981	P55083|MFAP4_HUMAN	88.58	3	3	Carbamidomethylation	28648	Microfibril-associated glycoprotein 4 OS=Homo sapiens GN=MFAP4 PE=1 SV=2
24	207982	tr|K7ES70|K7ES70_HUMAN	88.58	3	3	Carbamidomethylation	31326	Microfibril-associated glycoprotein 4 OS=Homo sapiens GN=MFAP4 PE=4 SV=1
8	399472	tr|A0A0G2JPF6|A0A0G2JPF6_HUMAN	26.41	1	1		72941	Putative golgin subfamily A member 8F/8G OS=Homo sapiens OX=9606 GN=GOLGA8F PE=4 SV=1
8	399473	tr|A0A0G2JP48|A0A0G2JP48_HUMAN	26.41	1	1		72955	Putative golgin subfamily A member 8F/8G OS=Homo sapiens OX=9606 GN=GOLGA8G PE=4 SV=1
8	422967	tr|H3BMC3|H3BMC3_HUMAN	26.41	1	1		71572	Putative golgin subfamily A member 8F/8G OS=Homo sapiens OX=9606 GN=GOLGA8F PE=4 SV=2
387	423040	tr|A0A0G2JRW3|A0A0G2JRW3_HUMAN	29.77	2	2		426594	Mucin-4 (Fragment) OS=Homo sapiens OX=9606 GN=MUC4 PE=1 SV=1
4	426674	sp|P13646|K1C13_HUMAN	96.7	1	1		49588	Keratin type I cytoskeletal 13 OS=Homo sapiens OX=9606 GN=KRT13 PE=1 SV=4
91	426855	tr|H0YBB2|H0YBB2_HUMAN	24.9	1	1		36960	Collagen alpha-1(XIV) chain (Fragment) OS=Homo sapiens OX=9606 GN=COL14A1 PE=1 SV=8
74	428738	sp|Q8IUA7|ABCA9_HUMAN	32.66	1	1		184360	ATP-binding cassette sub-family A member 9 OS=Homo sapiens OX=9606 GN=ABCA9 PE=1 SV=1
25	476684	B2R5B3|B2R5B3_HUMAN	38.2	1	1		14111	Histone H2A OS=Homo sapiens OX=9606 PE=2 SV=1
67	466622	sp|Q05707|COEA1_HUMAN	23.55	1	1		193513	Collagen alpha-1(XIV) chain OS=Homo sapiens OX=9606 GN=COL14A1 PE=1 SV=3
12	481508	B4DYV6|B4DYV6_HUMAN	22.99	1	1		62934	cDNA FLJ59075 moderately similar to Homo sapiens golgi autoantigen golgin subfamily a 8A (GOLGA8A) transcript variant 3 mRNA OS=Homo sapiens OX=9606 PE=2 SV=1
12	481511	A0A0G2JP48|A0A0G2JP48_HUMAN	22.99	1	1		72955	Putative golgin subfamily A member 8F/8G OS=Homo sapiens OX=9606 GN=GOLGA8G PE=4 SV=1
4	482818	A1A4E9|A1A4E9_HUMAN	96.7	1	1		49586	Keratin 13 OS=Homo sapiens OX=9606 GN=KRT13 PE=2 SV=1
13	29671	Q86YZ3|HORN_HUMAN	140.1	17	17		282389	Hornerin OS=Homo sapiens OX=9606 GN=HRNR PE=1 SV=2

## Sheet: Normal vs SCC
Protein Group	Protein ID	Accession	-10lgP	#Peptides	#Unique	PTM	Avg. Mass	Description
78	55	tr|H0YA55|H0YA55_HUMAN	41.94	1	1		51578	Serum albumin (Fragment) OS=Homo sapiens GN=ALB PE=4 SV=1
30	57	tr|B7WNR0|B7WNR0_HUMAN	25.93	1	1		56212	Serum albumin OS=Homo sapiens GN=ALB PE=2 SV=1
78	65	tr|C9JKR2|C9JKR2_HUMAN	41.94	1	1		47287	Albumin isoform CRA_k OS=Homo sapiens GN=ALB PE=4 SV=1
77	79	P10412|H14_HUMAN	21.11	1	1		21865	Histone H1.4 OS=Homo sapiens GN=HIST1H1E PE=1 SV=2
18	103	tr|Q6N095|Q6N095_HUMAN	84.57	3	3	Carbamidomethylation	52360	Putative uncharacterized protein DKFZp686K03196 OS=Homo sapiens GN=DKFZp686K03196 PE=1 SV=1
45	122	tr|Q0KKI6|Q0KKI6_HUMAN	62.63	2	2	Carbamidomethylation	24030	Immunoblobulin light chain (Fragment) OS=Homo sapiens PE=2 SV=1
45	123	tr|Q8TCD0|Q8TCD0_HUMAN	62.63	2	2	Carbamidomethylation	26235	Putative uncharacterized protein OS=Homo sapiens PE=2 SV=1
45	202	P01834|IGKC_HUMAN	62.63	2	2	Carbamidomethylation	11609	Ig kappa chain C region OS=Homo sapiens GN=IGKC PE=1 SV=1
45	203	tr|Q6GMX0|Q6GMX0_HUMAN	62.63	2	2	Carbamidomethylation	25807	Putative uncharacterized protein OS=Homo sapiens PE=2 SV=1
45	204	tr|Q5EFE6|Q5EFE6_HUMAN	62.63	2	2	Carbamidomethylation	25698	Anti-RhD monoclonal T125 kappa light chain OS=Homo sapiens PE=2 SV=1
45	207	tr|Q7Z3Y4|Q7Z3Y4_HUMAN	62.63	2	2	Carbamidomethylation	25702	Putative uncharacterized protein OS=Homo sapiens PE=1 SV=1
51	316	tr|A4UCT1|A4UCT1_HUMAN	34.66	1	1		17303	Glyceraldehyde-3-phosphate dehydrogenase (Fragment) OS=Homo sapiens PE=2 SV=1
51	317	tr|Q0QET7|Q0QET7_HUMAN	34.66	1	1		24620	Glyceraldehyde-3-phosphate dehydrogenase (Fragment) OS=Homo sapiens GN=GAPDH PE=2 SV=1
70	643	tr|K7EM90|K7EM90_HUMAN	56.01	2	2		21020	Enolase (Fragment) OS=Homo sapiens GN=ENO1 PE=3 SV=1
69	823	P37802|TAGL2_HUMAN	62.95	2	2	Carbamidomethylation	22391	Transgelin-2 OS=Homo sapiens GN=TAGLN2 PE=1 SV=3
58	857	tr|Q8WU19|Q8WU19_HUMAN	72.25	2	2		37218	TUBA1B protein OS=Homo sapiens GN=TUBA1B PE=2 SV=1
64	951	tr|Q96C29|Q96C29_HUMAN	30.03	1	1		26316	Putative uncharacterized protein (Fragment) OS=Homo sapiens PE=2 SV=1
64	952	tr|Q8TBL1|Q8TBL1_HUMAN	30.03	1	1		26488	Putative uncharacterized protein (Fragment) OS=Homo sapiens PE=2 SV=1
64	953	tr|Q6P082|Q6P082_HUMAN	30.03	1	1		26617	EEF1A1 protein (Fragment) OS=Homo sapiens GN=EEF1A1 PE=2 SV=1
64	954	tr|Q96CD8|Q96CD8_HUMAN	30.03	1	1		30700	Putative uncharacterized protein (Fragment) OS=Homo sapiens PE=2 SV=1
64	955	tr|Q6P4C9|Q6P4C9_HUMAN	30.03	1	1		31060	EEF1A1 protein (Fragment) OS=Homo sapiens GN=EEF1A1 PE=2 SV=1
64	956	tr|B4E2C5|B4E2C5_HUMAN	30.03	1	1		33189	cDNA FLJ54032 highly similar to Elongation factor 1-alpha 1 OS=Homo sapiens PE=2 SV=1
64	957	tr|Q504Z0|Q504Z0_HUMAN	30.03	1	1		33242	EEF1A1 protein OS=Homo sapiens GN=EEF1A1 PE=2 SV=1
64	958	tr|Q59GP5|Q59GP5_HUMAN	30.03	1	1		36911	Eukaryotic translation elongation factor 1 alpha 2 variant (Fragment) OS=Homo sapiens PE=2 SV=1
64	959	tr|Q8IUB0|Q8IUB0_HUMAN	30.03	1	1		38669	Elongation factor 1-alpha OS=Homo sapiens PE=2 SV=1
64	960	tr|Q53HR1|Q53HR1_HUMAN	30.03	1	1		39256	Elongation factor 1-alpha (Fragment) OS=Homo sapiens PE=2 SV=1
64	961	tr|B4DNE0|B4DNE0_HUMAN	30.03	1	1		42596	cDNA FLJ52573 highly similar to Elongation factor 1-alpha 1 OS=Homo sapiens PE=2 SV=1
64	962	tr|Q96RE1|Q96RE1_HUMAN	30.03	1	1		43025	Elongation factor 1-alpha OS=Homo sapiens GN=EEF1A1L14 PE=2 SV=1
64	963	tr|Q16577|Q16577_HUMAN	30.03	1	1		42824	Elongation factor 1-alpha OS=Homo sapiens GN=PTI-1 PE=2 SV=1
64	964	tr|Q9NZS6|Q9NZS6_HUMAN	30.03	1	1		46269	Elongation factor 1-alpha (Fragment) OS=Homo sapiens PE=2 SV=1
64	967	tr|A8K9C4|A8K9C4_HUMAN	30.03	1	1		50201	Elongation factor 1-alpha OS=Homo sapiens PE=2 SV=1
64	968	tr|Q53HM9|Q53HM9_HUMAN	30.03	1	1		50142	Elongation factor 1-alpha (Fragment) OS=Homo sapiens PE=2 SV=1
64	969	tr|Q53HR5|Q53HR5_HUMAN	30.03	1	1		50125	Elongation factor 1-alpha (Fragment) OS=Homo sapiens PE=2 SV=1
64	970	tr|Q6IPS9|Q6IPS9_HUMAN	30.03	1	1		50141	Elongation factor 1-alpha OS=Homo sapiens GN=EEF1A1 PE=2 SV=1
64	971	Q5VTE0|EF1A3_HUMAN	30.03	1	1		50185	Putative elongation factor 1-alpha-like 3 OS=Homo sapiens GN=EEF1A1P5 PE=5 SV=1
64	972	P68104|EF1A1_HUMAN	30.03	1	1		50141	Elongation factor 1-alpha 1 OS=Homo sapiens GN=EEF1A1 PE=1 SV=1
64	973	tr|Q6IPN6|Q6IPN6_HUMAN	30.03	1	1		50123	Elongation factor 1-alpha OS=Homo sapiens GN=EEF1A1 PE=2 SV=1
64	974	tr|Q53HQ7|Q53HQ7_HUMAN	30.03	1	1		50199	Elongation factor 1-alpha (Fragment) OS=Homo sapiens PE=2 SV=1
64	976	tr|Q6IPT9|Q6IPT9_HUMAN	30.03	1	1		50185	Elongation factor 1-alpha OS=Homo sapiens GN=EEF1A1 PE=2 SV=1
64	978	tr|Q53G85|Q53G85_HUMAN	30.03	1	1		50113	Elongation factor 1-alpha (Fragment) OS=Homo sapiens PE=2 SV=1
64	979	Q05639|EF1A2_HUMAN	30.03	1	1		50470	Elongation factor 1-alpha 2 OS=Homo sapiens GN=EEF1A2 PE=1 SV=1
57	998	Q01995|TAGL_HUMAN	82.61	3	3	Carbamidomethylation	22611	Transgelin OS=Homo sapiens GN=TAGLN PE=1 SV=4
57	999	tr|Q5U0D2|Q5U0D2_HUMAN	82.61	3	3	Carbamidomethylation	22611	Putative uncharacterized protein DKFZp686P11128 OS=Homo sapiens GN=TAGLN PE=2 SV=1
57	1000	tr|Q6FI52|Q6FI52_HUMAN	82.61	3	3	Carbamidomethylation	22551	TAGLN protein OS=Homo sapiens GN=TAGLN PE=2 SV=1
63	1179	tr|Q71V99|Q71V99_HUMAN	32.91	1	1		17971	Peptidyl-prolyl cis-trans isomerase OS=Homo sapiens PE=2 SV=1
63	1180	tr|A8K486|A8K486_HUMAN	32.91	1	1		18013	Peptidyl-prolyl cis-trans isomerase OS=Homo sapiens PE=2 SV=1
63	1181	tr|B2RE56|B2RE56_HUMAN	32.91	1	1		18008	Peptidyl-prolyl cis-trans isomerase OS=Homo sapiens PE=2 SV=1
71	1210	P31947|1433S_HUMAN	50	2	1		27774	14-3-3 protein sigma OS=Homo sapiens GN=SFN PE=1 SV=1
42	1279	tr|G3V5X4|G3V5X4_HUMAN	40.13	2	1		787736	Nesprin-2 OS=Homo sapiens GN=SYNE2 PE=2 SV=1
55	1408	Q9C0G6|DYH6_HUMAN	27.72	1	1		475986	Dynein heavy chain 6 axonemal OS=Homo sapiens GN=DNAH6 PE=1 SV=3
73	1433	tr|B0AZS6|B0AZS6_HUMAN	46.12	2	2		19072	14-3-3 protein zeta/delta OS=Homo sapiens GN=YWHAZ PE=2 SV=1
45	1553	tr|Q569I7|Q569I7_HUMAN	62.63	2	2	Carbamidomethylation	20668	Putative uncharacterized protein OS=Homo sapiens PE=2 SV=1
58	1749	tr|B4DN58|B4DN58_HUMAN	72.25	2	2		20043	cDNA FLJ53765 highly similar to Tubulin alpha chain OS=Homo sapiens PE=2 SV=1
29	2201	tr|A6NLG9|A6NLG9_HUMAN	34.2	1	1		34876	Biglycan OS=Homo sapiens GN=BGN PE=2 SV=1
29	2209	tr|B3KS75|B3KS75_HUMAN	34.2	1	1		39042	cDNA FLJ35704 fis clone SPLEN2020183 highly similar to Biglycan OS=Homo sapiens PE=2 SV=1
29	2213	P21810|PGS1_HUMAN	34.2	1	1		41654	Biglycan OS=Homo sapiens GN=BGN PE=1 SV=2
29	2214	tr|A8K7E0|A8K7E0_HUMAN	34.2	1	1		41669	cDNA FLJ76911 highly similar to Homo sapiens biglycan (BGN) mRNA OS=Homo sapiens PE=2 SV=1
29	2215	tr|Q53FI4|Q53FI4_HUMAN	34.2	1	1		41605	Biglycan preproprotein variant (Fragment) OS=Homo sapiens PE=2 SV=1
29	2216	tr|Q53HU6|Q53HU6_HUMAN	34.2	1	1		41655	Biglycan preproprotein variant (Fragment) OS=Homo sapiens PE=2 SV=1
38	2382	tr|D3DPF9|D3DPF9_HUMAN	37.58	1	1	Carbamidomethylation	2993008	Titin isoform CRA_b OS=Homo sapiens GN=TTN PE=2 SV=1
38	2383	tr|C0JYZ2|C0JYZ2_HUMAN	41.4	1	1	Carbamidomethylation	3713611	Titin OS=Homo sapiens GN=TTN PE=2 SV=1
38	2384	Q8WZ42|TITIN_HUMAN	41.4	1	1	Carbamidomethylation	3815922	Titin OS=Homo sapiens GN=TTN PE=1 SV=4
38	2385	tr|D3DPG0|D3DPG0_HUMAN	41.4	1	1	Carbamidomethylation	3881151	Titin isoform CRA_a OS=Homo sapiens GN=TTN PE=4 SV=1
29	5071	tr|B4DDQ2|B4DDQ2_HUMAN	34.2	1	1		37618	cDNA FLJ55187 highly similar to Biglycan OS=Homo sapiens PE=2 SV=1
67	5127	tr|E9PHT9|E9PHT9_HUMAN	47.04	1	1		18224	Annexin OS=Homo sapiens GN=ANXA5 PE=2 SV=1
67	5129	tr|E7ENQ5|E7ENQ5_HUMAN	47.04	1	1		30863	Annexin OS=Homo sapiens GN=ANXA5 PE=2 SV=1
33	5155	tr|Q5HY54|Q5HY54_HUMAN	56.66	2	2		276548	Filamin-A OS=Homo sapiens GN=FLNA PE=2 SV=1
33	5156	tr|Q60FE6|Q60FE6_HUMAN	56.66	2	2		277503	Filamin A OS=Homo sapiens GN=FLNA PE=2 SV=1
33	5157	tr|Q60FE5|Q60FE5_HUMAN	56.66	2	2		278224	Filamin A OS=Homo sapiens GN=FLNA PE=2 SV=1
23	38849	sp|Q8WXH0|SYNE2_HUMAN	20.03	1	1		796457	Nesprin-2 OS=Homo sapiens OX=9606 GN=SYNE2 PE=1 SV=3
78	48423	sp|P02768|ALBU_HUMAN	41.94	1	1		69367	Serum albumin OS=Homo sapiens OX=9606 GN=ALB PE=1 SV=2
78	48546	tr|A0A087WWT3|A0A087WWT3_HUMAN	41.94	1	1		45148	Serum albumin OS=Homo sapiens OX=9606 GN=ALB PE=1 SV=1
84	56625	P06576|ATPB_HUMAN	37.71	1	1		56560	ATP synthase subunit beta mitochondrial OS=Homo sapiens OX=9606 GN=ATP5F1B PE=1 SV=3
32	68468	tr|D2JYH7|D2JYH7_HUMAN	56.26	2	2		227337	Myosin heavy chain 11 smooth muscle isoform 1 OS=Homo sapiens GN=MYH11 PE=2 SV=1
32	68469	P35749|MYH11_HUMAN	56.26	2	2		227337	Myosin-11 OS=Homo sapiens GN=MYH11 PE=1 SV=3
[truncated: 55 more rows]

## Sheet: SIL vs SCC
Protein Group	Protein ID	Accession	-10lgP	#Peptides	#Unique	PTM	Avg. Mass	Description
[truncated: 351 more rows]
